# Supplementary material for: Label Retaining Cells (LRCs) with Myoepithelial Characteristic from the Proximal Acinar Region Define Stem Cells in the Sweat Gland
Source: PLoS One. 2013 Sep 18;8(9):e74174. doi: 10.1371/journal.pone.0074174 (PMC3776797; doi:10.1371/journal.pone.0074174)
Supplement: Table S2 — Unique DEG list for SG LRCs. Functionally categorized list of genes identified in SG LRCs (GFP+/α6+) when compared to the basal layer of the sole’s epidermis. (XLSX) [file pone.0074174.s004.xlsx]

## Sheet: unique DEG-SGGFPa6 vs IFskina6-
Transcript ID	Column #	gene_assignment	Gene Symbol	RefSeq	Ratio(SGGFPa6-2010 vs. IFskina6-2010)	Fold-Change(SGGFPa6-2010 vs. IFskina6-2010)	Fold-Change(SGGFPa6-2010 vs. IFskina6-2010) (Description)	Ratio(SGGFPa6-2011 vs. IFskina6-2011)	Fold-Change(SGGFPa6-2011 vs. IFskina6-2011)	Fold-Change(SGGFPa6-2011 vs. IFskina6-2011) (Description)
10372078	9447	NM_026065 // Mrpl42 // mitochondrial ribosomal protein L42 // 10 C2|10 39.0 cM // 67270	Mrpl42	NM_026065	26.4149	26.4149	SGGFPa6-2010 up vs IFskina6-2010	3.65634	3.65634	SGGFPa6-2011 up vs IFskina6-2011
10425299	15219	NM_172609 // Tomm22 // translocase of outer mitochondrial membrane 22 homolog (yeast) /	Tomm22	NM_172609	20.0124	20.0124	SGGFPa6-2010 up vs IFskina6-2010	6.8628	6.8628	SGGFPa6-2011 up vs IFskina6-2011
10406710	13109	NM_009321 // Tbca // tubulin cofactor A // 13 D1|13 // 21371 /// ENSMUST00000046644 //	Tbca	NM_009321	17.6392	17.6392	SGGFPa6-2010 up vs IFskina6-2010	2.18532	2.18532	SGGFPa6-2011 up vs IFskina6-2011
10384458	10727	NM_019549 // Plek // pleckstrin // 11 A2|11 6.5 cM // 56193 /// ENSMUST00000102881 // P	Plek	NM_019549	16.7958	16.7958	SGGFPa6-2010 up vs IFskina6-2010	5.03344	5.03344	SGGFPa6-2011 up vs IFskina6-2011
10452643	18123	NM_026064 // 2900073G15Rik // RIKEN cDNA 2900073G15 gene // 17 E1.3|17 // 67268 /// ENS	2900073G15Rik	NM_026064	15.5676	15.5676	SGGFPa6-2010 up vs IFskina6-2010	2.13916	2.13916	SGGFPa6-2011 up vs IFskina6-2011
10528207	26122	NM_001159557 // Cd36 // CD36 antigen // 5 A3|5 2.0 cM // 12491 /// NM_001159558 // Cd36	Cd36	NM_001159557	13.679	13.679	SGGFPa6-2010 up vs IFskina6-2010	6.56247	6.56247	SGGFPa6-2011 up vs IFskina6-2011
10358709	8069	NM_025379 // Cox7b // cytochrome c oxidase subunit VIIb // X|X C3 // 66142 /// ENSMUST0	Cox7b	NM_025379	13.674	13.674	SGGFPa6-2010 up vs IFskina6-2010	2.35003	2.35003	SGGFPa6-2011 up vs IFskina6-2011
10408693	13385	NM_028784 // F13a1 // coagulation factor XIII, A1 subunit // 13 A3.3|13 // 74145 /// NM	F13a1	NM_028784	12.1244	12.1244	SGGFPa6-2010 up vs IFskina6-2010	2.9339	2.9339	SGGFPa6-2011 up vs IFskina6-2011
10512093	24469	NM_001033305 // Ndufb6 // NADH dehydrogenase (ubiquinone) 1 beta subcomplex, 6 // 4 A5|	Ndufb6	NM_001033305	12.0278	12.0278	SGGFPa6-2010 up vs IFskina6-2010	3.08905	3.08905	SGGFPa6-2011 up vs IFskina6-2011
10603551	34743	NM_007807 // Cybb // cytochrome b-245, beta polypeptide // X A1.1|X // 13058 /// ENSMUS	Cybb	NM_007807	11.9609	11.9609	SGGFPa6-2010 up vs IFskina6-2010	2.31997	2.31997	SGGFPa6-2011 up vs IFskina6-2011
10461622	19050	NM_027209 // Ms4a6b // membrane-spanning 4-domains, subfamily A, member 6B // 19|19 B /	Ms4a6b	NM_027209	11.7926	11.7926	SGGFPa6-2010 up vs IFskina6-2010	2.25965	2.25965	SGGFPa6-2011 up vs IFskina6-2011
10383758	10651	NR_002321 // Tug1 // taurine upregulated gene 1 // 11 A1|11 // 544752 /// NR_002322 //	Tug1	NR_002321	11.507	11.507	SGGFPa6-2010 up vs IFskina6-2010	2.78608	2.78608	SGGFPa6-2011 up vs IFskina6-2011
10482500	21248	NM_028810 // Rnd3 // Rho family GTPase 3 // 2 C1.1|2 // 74194 /// ENSMUST00000017288 //	Rnd3	NM_028810	11.0837	11.0837	SGGFPa6-2010 up vs IFskina6-2010	2.87598	2.87598	SGGFPa6-2011 up vs IFskina6-2011
10565712	30469	NM_025408 // Acer3 // alkaline ceramidase 3 // 7 E2|7 // 66190 /// ENSMUST00000033020 /	Acer3	NM_025408	11.0746	11.0746	SGGFPa6-2010 up vs IFskina6-2010	2.13251	2.13251	SGGFPa6-2011 up vs IFskina6-2011
10428554	15576	NM_080635 // Eif3h // eukaryotic translation initiation factor 3, subunit H // 15|15 D1	Eif3h	NM_080635	10.4931	10.4931	SGGFPa6-2010 up vs IFskina6-2010	2.38317	2.38317	SGGFPa6-2011 up vs IFskina6-2011
10399825	12306	NM_007861 // Dld // dihydrolipoamide dehydrogenase // 12 A3|12 15.1 cM // 13382 /// ENS	Dld	NM_007861	9.90532	9.90532	SGGFPa6-2010 up vs IFskina6-2010	4.16756	4.16756	SGGFPa6-2011 up vs IFskina6-2011
10485635	21624	NM_145380 // Eif3m // eukaryotic translation initiation factor 3, subunit M // 2 E2|2 5	Eif3m	NM_145380	9.77046	9.77046	SGGFPa6-2010 up vs IFskina6-2010	4.14483	4.14483	SGGFPa6-2011 up vs IFskina6-2011
10444800	17260	NM_011482 // Nhp2l1 // NHP2 non-histone chromosome protein 2-like 1 (S. cerevisiae) //	Nhp2l1	NM_011482	9.75565	9.75565	SGGFPa6-2010 up vs IFskina6-2010	2.12821	2.12821	SGGFPa6-2011 up vs IFskina6-2011
10494322	22523	NM_023210 // Anp32e // acidic (leucine-rich) nuclear phosphoprotein 32 family, member E	Anp32e	NM_023210	9.7392	9.7392	SGGFPa6-2010 up vs IFskina6-2010	3.11932	3.11932	SGGFPa6-2011 up vs IFskina6-2011
10407072	13157	NM_029001 // Elovl7 // ELOVL family member 7, elongation of long chain fatty acids (yea	Elovl7	NM_029001	9.69973	9.69973	SGGFPa6-2010 up vs IFskina6-2010	3.21148	3.21148	SGGFPa6-2011 up vs IFskina6-2011
10359689	8151	NM_009721 // Atp1b1 // ATPase, Na+/K+ transporting, beta 1 polypeptide // 1 H2.2|1 86.8	Atp1b1	NM_009721	9.5676	9.5676	SGGFPa6-2010 up vs IFskina6-2010	15.4843	15.4843	SGGFPa6-2011 up vs IFskina6-2011
10393936	11647	NM_007621 // Cbr2 // carbonyl reductase 2 // 11 E2|11 72.5 cM // 12409 /// ENSMUST00000	Cbr2	NM_007621	9.23889	9.23889	SGGFPa6-2010 up vs IFskina6-2010	4.63611	4.63611	SGGFPa6-2011 up vs IFskina6-2011
10446282	17448	NM_010130 // Emr1 // EGF-like module containing, mucin-like, hormone receptor-like sequ	Emr1	NM_010130	9.09446	9.09446	SGGFPa6-2010 up vs IFskina6-2010	2.7221	2.7221	SGGFPa6-2011 up vs IFskina6-2011
10411491	13702	NM_178716 // Tnpo1 // transportin 1 // 13 D1|13 53.0 cM // 238799 /// NM_001048267 // T	Tnpo1	NM_178716	9.08543	9.08543	SGGFPa6-2010 up vs IFskina6-2010	2.34718	2.34718	SGGFPa6-2011 up vs IFskina6-2011
10501063	23275	NM_007651 // Cd53 // CD53 antigen // 3 F2.3|3 50.5 cM // 12508 /// ENSMUST00000038845 /	Cd53	NM_007651	9.08477	9.08477	SGGFPa6-2010 up vs IFskina6-2010	8.28371	8.28371	SGGFPa6-2011 up vs IFskina6-2011
10373454	9582	NM_011119 // Pa2g4 // proliferation-associated 2G4 // 10 D3|10 // 18813 /// ENSMUST0000	Pa2g4	NM_011119	8.7236	8.7236	SGGFPa6-2010 up vs IFskina6-2010	5.32137	5.32137	SGGFPa6-2011 up vs IFskina6-2011
10544644	27857	U42384 // Dfna5 // deafness, autosomal dominant 5 (human) // 6 B2.3|6 // 54722 /// ENSM	Dfna5	U42384	8.46578	8.46578	SGGFPa6-2010 up vs IFskina6-2010	2.02866	2.02866	SGGFPa6-2011 up vs IFskina6-2011
10499420	23073	NM_031248 // Robld3 // roadblock domain containing 3 // 3 F1|3 // 83409 /// ENSMUST0000	Robld3	NM_031248	8.29453	8.29453	SGGFPa6-2010 up vs IFskina6-2010	3.38489	3.38489	SGGFPa6-2011 up vs IFskina6-2011
10369647	9232	NM_053183 // Ddx50 // DEAD (Asp-Glu-Ala-Asp) box polypeptide 50 // 10 B4|10 // 94213 //	Ddx50	NM_053183	8.21507	8.21507	SGGFPa6-2010 up vs IFskina6-2010	4.32162	4.32162	SGGFPa6-2011 up vs IFskina6-2011
10545958	28058	NM_013471 // Anxa4 // annexin A4 // 6 D1|6 38.0 cM // 11746 /// ENSMUST00000001187 // A	Anxa4	NM_013471	8.16076	8.16076	SGGFPa6-2010 up vs IFskina6-2010	2.96312	2.96312	SGGFPa6-2011 up vs IFskina6-2011
10453544	18203	NM_176917 // Mettl4 // methyltransferase like 4 // 17 E5|17 // 76781 /// ENSMUST0000009	Mettl4	NM_176917	8.02819	8.02819	SGGFPa6-2010 up vs IFskina6-2010	2.29539	2.29539	SGGFPa6-2011 up vs IFskina6-2011
10497501	22855	XM_975226 // Naaladl2 // N-acetylated alpha-linked acidic dipeptidase-like 2 // 3 A3|3	Naaladl2	XM_975226	7.86563	7.86563	SGGFPa6-2010 up vs IFskina6-2010	3.95392	3.95392	SGGFPa6-2011 up vs IFskina6-2011
10409804	13512	NM_153538 // Zcchc6 // zinc finger, CCHC domain containing 6 // 13 B2|13 // 214290 ///	Zcchc6	NM_153538	7.77539	7.77539	SGGFPa6-2010 up vs IFskina6-2010	5.16331	5.16331	SGGFPa6-2011 up vs IFskina6-2011
10473343	20268	NM_025885 // Med19 // mediator of RNA polymerase II transcription, subunit 19 homolog (	Med19	NM_025885	7.76637	7.76637	SGGFPa6-2010 up vs IFskina6-2010	2.82882	2.82882	SGGFPa6-2011 up vs IFskina6-2011
10475990	20595	NM_015747 // Slc20a1 // solute carrier family 20, member 1 // 2 F1|2 73.0 cM // 20515 /	Slc20a1	NM_015747	7.53394	7.53394	SGGFPa6-2010 up vs IFskina6-2010	2.27401	2.27401	SGGFPa6-2011 up vs IFskina6-2011
10379727	10243	NM_001081957 // Gm11428 // predicted gene 11428 // 11 C|11 // 100034251 /// FJ007372 //	Gm11428	NM_001081957	7.5246	7.5246	SGGFPa6-2010 up vs IFskina6-2010	3.91684	3.91684	SGGFPa6-2011 up vs IFskina6-2011
10538253	27141	NM_001164734 // Mpp6 // membrane protein, palmitoylated 6 (MAGUK p55 subfamily member 6	Mpp6	NM_001164734	7.51018	7.51018	SGGFPa6-2010 up vs IFskina6-2010	2.69336	2.69336	SGGFPa6-2011 up vs IFskina6-2011
10385081	10795	AY702092 // Anp32-ps // acidic (leucine-rich) nuclear phosphoprotein 32 family, pseudog	Anp32-ps	AY702092	7.38722	7.38722	SGGFPa6-2010 up vs IFskina6-2010	3.55705	3.55705	SGGFPa6-2011 up vs IFskina6-2011
10374464	9711	BC040462 // Spred2 // sprouty-related, EVH1 domain containing 2 // 11|11 A3.2 // 114716	Spred2	BC040462	7.24061	7.24061	SGGFPa6-2010 up vs IFskina6-2010	3.27068	3.27068	SGGFPa6-2011 up vs IFskina6-2011
10367073	8948	NM_026943 // Snrpd2 // small nuclear ribonucleoprotein D2 // 7 A3|7 // 107686 /// ENSMU	Snrpd2	NM_026943	7.23564	7.23564	SGGFPa6-2010 up vs IFskina6-2010	2.40969	2.40969	SGGFPa6-2011 up vs IFskina6-2011
10514366	24715	NR_033611 // Gm12669 // predicted gene 12669 // 4 C5|4 // 620016 /// NM_023140 // Glrx3	Gm12669	NR_033611	7.10296	7.10296	SGGFPa6-2010 up vs IFskina6-2010	6.87989	6.87989	SGGFPa6-2011 up vs IFskina6-2011
10419038	14572	NM_078478 // Ghitm // growth hormone inducible transmembrane protein // 14 B|14 15.0 cM	Ghitm	NM_078478	6.88964	6.88964	SGGFPa6-2010 up vs IFskina6-2010	2.21509	2.21509	SGGFPa6-2011 up vs IFskina6-2011
10428842	15608	NM_175151 // Tatdn1 // TatD DNase domain containing 1 // 15 D1|15 // 69694 /// NM_17522	Tatdn1	NM_175151	6.85315	6.85315	SGGFPa6-2010 up vs IFskina6-2010	5.67444	5.67444	SGGFPa6-2011 up vs IFskina6-2011
10578771	31962	NM_144731 // Galnt7 // UDP-N-acetyl-alpha-D-galactosamine: polypeptide N-acetylgalactos	Galnt7	NM_144731	6.8478	6.8478	SGGFPa6-2010 up vs IFskina6-2010	2.63521	2.63521	SGGFPa6-2011 up vs IFskina6-2011
10456699	18525	NM_177470 // Acaa2 // acetyl-Coenzyme A acyltransferase 2 (mitochondrial 3-oxoacyl-Coen	Acaa2	NM_177470	6.8128	6.8128	SGGFPa6-2010 up vs IFskina6-2010	2.96032	2.96032	SGGFPa6-2011 up vs IFskina6-2011
10430846	15815	NM_025987 // Ndufa6 // NADH dehydrogenase (ubiquinone) 1 alpha subcomplex, 6 (B14) // 1	Ndufa6	NM_025987	6.81162	6.81162	SGGFPa6-2010 up vs IFskina6-2010	6.58721	6.58721	SGGFPa6-2011 up vs IFskina6-2011
10401630	12491	NM_025421 // Acyp1 // acylphosphatase 1, erythrocyte (common) type // 12 D2|12 // 66204	Acyp1	NM_025421	6.7624	6.7624	SGGFPa6-2010 up vs IFskina6-2010	3.33851	3.33851	SGGFPa6-2011 up vs IFskina6-2011
10384150	10692	ENSMUST00000059507 // Purb // purine rich element binding protein B // 11 A1|11 3.0 cM	Purb	ENSMUST00000059507	6.60491	6.60491	SGGFPa6-2010 up vs IFskina6-2010	3.21251	3.21251	SGGFPa6-2011 up vs IFskina6-2011
10479979	21025	NM_138756 // Slc25a36 // solute carrier family 25, member 36 // 9 E3.3|9 // 192287 ///	Slc25a36	NM_138756	6.55832	6.55832	SGGFPa6-2010 up vs IFskina6-2010	3.57462	3.57462	SGGFPa6-2011 up vs IFskina6-2011
10383671	10643	NM_007879 // Drg1 // developmentally regulated GTP binding protein 1 // 11 A1|11 // 134	Drg1	NM_007879	6.5047	6.5047	SGGFPa6-2010 up vs IFskina6-2010	3.27683	3.27683	SGGFPa6-2011 up vs IFskina6-2011
10404774	12876	NM_007772 // Hivep1 // human immunodeficiency virus type I enhancer binding protein 1 /	Hivep1	NM_007772	6.49822	6.49822	SGGFPa6-2010 up vs IFskina6-2010	2.30318	2.30318	SGGFPa6-2011 up vs IFskina6-2011
10361091	8309	NM_007498 // Atf3 // activating transcription factor 3 // 1 H6|1 103.2 cM // 11910 ///	Atf3	NM_007498	6.48391	6.48391	SGGFPa6-2010 up vs IFskina6-2010	2.01428	2.01428	SGGFPa6-2011 up vs IFskina6-2011
10496485	22737	NM_007917 // Eif4e // eukaryotic translation initiation factor 4E // 3 G3-H1|3 25.0 cM	Eif4e	NM_007917	6.3999	6.3999	SGGFPa6-2010 up vs IFskina6-2010	2.25782	2.25782	SGGFPa6-2011 up vs IFskina6-2011
10461587	19046	XM_986941 // Ms4a4a // membrane-spanning 4-domains, subfamily A, member 4A // 19 A|19 /	Ms4a4a	XM_986941	6.38536	6.38536	SGGFPa6-2010 up vs IFskina6-2010	8.10604	8.10604	SGGFPa6-2011 up vs IFskina6-2011
10517517	25072	NM_007572 // C1qa // complement component 1, q subcomponent, alpha polypeptide // 4 D3|	C1qa	NM_007572	6.38081	6.38081	SGGFPa6-2010 up vs IFskina6-2010	2.96733	2.96733	SGGFPa6-2011 up vs IFskina6-2011
10440647	16843	NM_018778 // Cldn8 // claudin 8 // 16 C3.3|16 // 54420 /// ENSMUST00000049697 // Cldn8	Cldn8	NM_018778	6.37291	6.37291	SGGFPa6-2010 up vs IFskina6-2010	7.51658	7.51658	SGGFPa6-2011 up vs IFskina6-2011
10474411	20445	NM_011699 // Lin7c // lin-7 homolog C (C. elegans) // 2 E3|2 61.0 cM // 22343 /// ENSMU	Lin7c	NM_011699	6.36542	6.36542	SGGFPa6-2010 up vs IFskina6-2010	2.56383	2.56383	SGGFPa6-2011 up vs IFskina6-2011
10554926	29101	NM_025515 // Ccdc90b // coiled-coil domain containing 90B // 7 E1|7 // 66365 /// NM_001	Ccdc90b	NM_025515	6.26917	6.26917	SGGFPa6-2010 up vs IFskina6-2010	5.05514	5.05514	SGGFPa6-2011 up vs IFskina6-2011
10556764	29343	NM_013636 // Ppp1cc // protein phosphatase 1, catalytic subunit, gamma isoform // 5|5 F	Ppp1cc	NM_013636	6.24697	6.24697	SGGFPa6-2010 up vs IFskina6-2010	2.75458	2.75458	SGGFPa6-2011 up vs IFskina6-2011
10435075	16215	NM_011638 // Tfrc // transferrin receptor // 16 B3|16 21.2 cM // 22042 /// ENSMUST00000	Tfrc	NM_011638	6.09774	6.09774	SGGFPa6-2010 up vs IFskina6-2010	4.99583	4.99583	SGGFPa6-2011 up vs IFskina6-2011
10422980	14981	NM_177178 // Lmbrd2 // LMBR1 domain containing 2 // 15 A1|15 // 320506 /// ENSMUST00000	Lmbrd2	NM_177178	6.00133	6.00133	SGGFPa6-2010 up vs IFskina6-2010	2.29942	2.29942	SGGFPa6-2011 up vs IFskina6-2011				Apoptosis
10498361	22956	NM_032399 // Gpr87 // G protein-coupled receptor 87 // 3 D|3 // 84111 /// ENSMUST000000	Gpr87	NM_032399	5.98555	5.98555	SGGFPa6-2010 up vs IFskina6-2010	3.71792	3.71792	SGGFPa6-2011 up vs IFskina6-2011
10551883	28762	NM_011662 // Tyrobp // TYRO protein tyrosine kinase binding protein // 7 B|7 10.0 cM //	Tyrobp	NM_011662	5.95402	5.95402	SGGFPa6-2010 up vs IFskina6-2010	2.02052	2.02052	SGGFPa6-2011 up vs IFskina6-2011
10511345	24376	NM_181989 // Sdr16c5 // short chain dehydrogenase/reductase family 16C, member 5 // 4 A	Sdr16c5	NM_181989	5.73358	5.73358	SGGFPa6-2010 up vs IFskina6-2010	5.71052	5.71052	SGGFPa6-2011 up vs IFskina6-2011
10479726	20993	NM_153594 // Pcmtd2 // protein-L-isoaspartate (D-aspartate) O-methyltransferase domain	Pcmtd2	NM_153594	5.7155	5.7155	SGGFPa6-2010 up vs IFskina6-2010	3.02586	3.02586	SGGFPa6-2011 up vs IFskina6-2011
10543944	27780	NM_008098 // Mtpn // myotrophin // 6 B1|6 // 14489 /// ENSMUST00000031866 // Mtpn // my	Mtpn	NM_008098	5.6872	5.6872	SGGFPa6-2010 up vs IFskina6-2010	2.67681	2.67681	SGGFPa6-2011 up vs IFskina6-2011
10394448	11689	NM_030723 // Pum2 // pumilio 2 (Drosophila) // 12 A1.3|12 // 80913 /// NM_001160219 //	Pum2	NM_030723	5.67853	5.67853	SGGFPa6-2010 up vs IFskina6-2010	2.4915	2.4915	SGGFPa6-2011 up vs IFskina6-2011
10530612	26352	NM_028194 // Fryl // furry homolog-like (Drosophila) // 5 C3.2|5 // 72313 /// ENSMUST00	Fryl	NM_028194	5.67551	5.67551	SGGFPa6-2010 up vs IFskina6-2010	2.61753	2.61753	SGGFPa6-2011 up vs IFskina6-2011
10474700	20492	NM_011580 // Thbs1 // thrombospondin 1 // 2 F1-F3|2 65.0 cM // 21825 /// ENSMUST0000003	Thbs1	NM_011580	5.67287	5.67287	SGGFPa6-2010 up vs IFskina6-2010	2.62224	2.62224	SGGFPa6-2011 up vs IFskina6-2011
10379689	10239	NM_027427 // Taf15 // TAF15 RNA polymerase II, TATA box binding protein (TBP)-associate	Taf15	NM_027427	5.66452	5.66452	SGGFPa6-2010 up vs IFskina6-2010	3.26611	3.26611	SGGFPa6-2011 up vs IFskina6-2011
10384656	10751	NM_016888 // B3gnt2 // UDP-GlcNAc:betaGal beta-1,3-N-acetylglucosaminyltransferase 2 //	B3gnt2	NM_016888	5.66258	5.66258	SGGFPa6-2010 up vs IFskina6-2010	3.33973	3.33973	SGGFPa6-2011 up vs IFskina6-2011
10484402	21375	NM_007615 // Ctnnd1 // catenin (cadherin associated protein), delta 1 // 2 D|2 47.8 cM	Ctnnd1	NM_007615	5.657	5.657	SGGFPa6-2010 up vs IFskina6-2010	2.79786	2.79786	SGGFPa6-2011 up vs IFskina6-2011
10368041	9055	NM_028440 // 3110003A17Rik // RIKEN cDNA 3110003A17 gene // 10 A3|10 // 73112 /// ENSMU	3110003A17Rik	NM_028440	5.65357	5.65357	SGGFPa6-2010 up vs IFskina6-2010	2.72893	2.72893	SGGFPa6-2011 up vs IFskina6-2011
10594613	33663	NM_144937 // Usp3 // ubiquitin specific peptidase 3 // 9 C|9 // 235441 /// ENSMUST00000	Usp3	NM_144937	5.64745	5.64745	SGGFPa6-2010 up vs IFskina6-2010	2.74039	2.74039	SGGFPa6-2011 up vs IFskina6-2011
10596347	33850	NM_175025 // Atp2c1 // ATPase, Ca++-sequestering // 9 F1|9 // 235574 /// ENSMUST0000003	Atp2c1	NM_175025	5.61023	5.61023	SGGFPa6-2010 up vs IFskina6-2010	2.10303	2.10303	SGGFPa6-2011 up vs IFskina6-2011
10507784	24032	NM_008917 // Ppt1 // palmitoyl-protein thioesterase 1 // 4 D1-D3|4 59.1 cM // 19063 ///	Ppt1	NM_008917	5.58095	5.58095	SGGFPa6-2010 up vs IFskina6-2010	3.04828	3.04828	SGGFPa6-2011 up vs IFskina6-2011
10545910	28052	NM_025823 // Pcyox1 // prenylcysteine oxidase 1 // 6 D1|6 // 66881 /// ENSMUST000000320	Pcyox1	NM_025823	5.57137	5.57137	SGGFPa6-2010 up vs IFskina6-2010	3.11328	3.11328	SGGFPa6-2011 up vs IFskina6-2011
10484888	21556	NM_008982 // Ptprj // protein tyrosine phosphatase, receptor type, J // 2 E1-2|2 49.5 c	Ptprj	NM_008982	5.56414	5.56414	SGGFPa6-2010 up vs IFskina6-2010	3.37651	3.37651	SGGFPa6-2011 up vs IFskina6-2011
10495163	22606	NM_026013 // Dram2 // VDNA-damage regulated autophagy modulator 2 // 3|3 F3 // 67171 //	Dram2	NM_026013	5.5231	5.5231	SGGFPa6-2010 up vs IFskina6-2010	2.09244	2.09244	SGGFPa6-2011 up vs IFskina6-2011
10542714	27647	NM_001163628 // Lyrm5 // LYR motif containing 5 // 6 G3|6 71.12 cM // 67636 /// NM_1336	Lyrm5	NM_001163628	5.50748	5.50748	SGGFPa6-2010 up vs IFskina6-2010	3.44631	3.44631	SGGFPa6-2011 up vs IFskina6-2011
10372478	9491	NM_024454 // Rab21 // RAB21, member RAS oncogene family // 10|10 D1 // 216344 /// ENSMU	Rab21	NM_024454	5.50348	5.50348	SGGFPa6-2010 up vs IFskina6-2010	2.40058	2.40058	SGGFPa6-2011 up vs IFskina6-2011
10549276	28411	NM_024469 // Bhlhe41 // basic helix-loop-helix family, member e41 // 6 G2-G3|6 74.5 cM	Bhlhe41	NM_024469	5.49772	5.49772	SGGFPa6-2010 up vs IFskina6-2010	2.00388	2.00388	SGGFPa6-2011 up vs IFskina6-2011
10586284	32855	NM_028906 // Dpp8 // dipeptidylpeptidase 8 // 9|9 D // 74388 /// ENSMUST00000034960 //	Dpp8	NM_028906	5.42956	5.42956	SGGFPa6-2010 up vs IFskina6-2010	3.04081	3.04081	SGGFPa6-2011 up vs IFskina6-2011
10430265	15750	NM_018749 // Eif3d // eukaryotic translation initiation factor 3, subunit D // 15 E1|15	Eif3d	NM_018749	5.36286	5.36286	SGGFPa6-2010 up vs IFskina6-2010	2.01133	2.01133	SGGFPa6-2011 up vs IFskina6-2011				Cytoskeleton
10543959	27782	NM_008973 // Ptn // pleiotrophin // 6 B1|6 13.5 cM // 19242 /// ENSMUST00000101534 // P	Ptn	NM_008973	5.28243	5.28243	SGGFPa6-2010 up vs IFskina6-2010	4.48283	4.48283	SGGFPa6-2011 up vs IFskina6-2011
10401138	12446	NM_023721 // Atp6v1d // ATPase, H+ transporting, lysosomal V1 subunit D // 12 C3|12 36.	Atp6v1d	NM_023721	5.27057	5.27057	SGGFPa6-2010 up vs IFskina6-2010	3.92097	3.92097	SGGFPa6-2011 up vs IFskina6-2011
10395932	11860	NM_146034 // Ctage5 // CTAGE family, member 5 // 12 C1|12 23.0 cM // 217615 /// NM_0011	Ctage5	NM_146034	5.26379	5.26379	SGGFPa6-2010 up vs IFskina6-2010	3.67427	3.67427	SGGFPa6-2011 up vs IFskina6-2011
10365590	8800	NM_026070 // Ccdc53 // coiled-coil domain containing 53 // 10|10 C2 // 67282 /// NM_001	Ccdc53	NM_026070	5.24198	5.24198	SGGFPa6-2010 up vs IFskina6-2010	2.92399	2.92399	SGGFPa6-2011 up vs IFskina6-2011
10591253	33312	NM_001082485 // 5730601F06Rik // RIKEN cDNA 5730601F06 gene // 9 A3|9 // 77519 /// NM_0	5730601F06Rik	NM_001082485	5.19718	5.19718	SGGFPa6-2010 up vs IFskina6-2010	3.5152	3.5152	SGGFPa6-2011 up vs IFskina6-2011
10357454	7896	NM_177445 // Dars // aspartyl-tRNA synthetase // 1 E4|1 // 226414 /// NM_145507 // Dars	Dars	NM_177445	5.17223	5.17223	SGGFPa6-2010 up vs IFskina6-2010	5.23387	5.23387	SGGFPa6-2011 up vs IFskina6-2011
10525657	25863	NM_026603 // Denr // density-regulated protein // 5 F|5 // 68184 /// ENSMUST00000023869	Denr	NM_026603	5.15291	5.15291	SGGFPa6-2010 up vs IFskina6-2010	5.78491	5.78491	SGGFPa6-2011 up vs IFskina6-2011
10504458	23654	NM_001080385 // Clta // clathrin, light polypeptide (Lca) // 4 B1|4 // 12757 /// NM_016	Clta	NM_001080385	5.1465	5.1465	SGGFPa6-2010 up vs IFskina6-2010	2.38473	2.38473	SGGFPa6-2011 up vs IFskina6-2011
10362811	8500	NM_001162908 // Sesn1 // sestrin 1 // 10 B2|10 25.0 cM // 140742 /// NM_001013370 // Se	Sesn1	NM_001162908	5.12576	5.12576	SGGFPa6-2010 up vs IFskina6-2010	3.06811	3.06811	SGGFPa6-2011 up vs IFskina6-2011
10420338	14736	NM_025682 // Pspc1 // paraspeckle protein 1 // 14 C3|14 // 66645 /// ENSMUST00000022507	Pspc1	NM_025682	5.11271	5.11271	SGGFPa6-2010 up vs IFskina6-2010	2.08668	2.08668	SGGFPa6-2011 up vs IFskina6-2011				Receptor
10354555	7625	NM_133728 // Asnsd1 // asparagine synthetase domain containing 1 // 1|1 C1 // 70396 ///	Asnsd1	NM_133728	5.11247	5.11247	SGGFPa6-2010 up vs IFskina6-2010	3.23388	3.23388	SGGFPa6-2011 up vs IFskina6-2011
10564573	30346	NM_001081345 // Chd2 // chromodomain helicase DNA binding protein 2 // 7 D1|7 // 244059	Chd2	NM_001081345	5.09562	5.09562	SGGFPa6-2010 up vs IFskina6-2010	2.14265	2.14265	SGGFPa6-2011 up vs IFskina6-2011
10459590	18828	NM_001127177 // Ptpn2 // protein tyrosine phosphatase, non-receptor type 2 // 18 E1|18	Ptpn2	NM_001127177	5.06032	5.06032	SGGFPa6-2010 up vs IFskina6-2010	3.33711	3.33711	SGGFPa6-2011 up vs IFskina6-2011
10490872	22138	NM_001163579 // Lrrcc1 // leucine rich repeat and coiled-coil domain containing 1 // 3|	Lrrcc1	NM_001163579	5.05687	5.05687	SGGFPa6-2010 up vs IFskina6-2010	2.52811	2.52811	SGGFPa6-2011 up vs IFskina6-2011
10531529	26462	NM_178854 // Cnot6l // CCR4-NOT transcription complex, subunit 6-like // 5 E3|5 // 2314	Cnot6l	NM_178854	5.02856	5.02856	SGGFPa6-2010 up vs IFskina6-2010	2.98799	2.98799	SGGFPa6-2011 up vs IFskina6-2011
10366310	8864	NM_175489 // Osbpl8 // oxysterol binding protein-like 8 // 10 D1|10 // 237542 /// NM_00	Osbpl8	NM_175489	5.01759	5.01759	SGGFPa6-2010 up vs IFskina6-2010	2.02957	2.02957	SGGFPa6-2011 up vs IFskina6-2011
10456764	18535	NM_010754 // Smad2 // MAD homolog 2 (Drosophila) // 18 E3|18 48.0 cM // 17126 /// ENSMU	Smad2	NM_010754	4.99867	4.99867	SGGFPa6-2010 up vs IFskina6-2010	2.25333	2.25333	SGGFPa6-2011 up vs IFskina6-2011
10500268	23183	NM_078479 // Mrps21 // mitochondrial ribosomal protein S21 // 3|3 F2 // 66292 /// ENSMU	Mrps21	NM_078479	4.98804	4.98804	SGGFPa6-2010 up vs IFskina6-2010	2.1226	2.1226	SGGFPa6-2011 up vs IFskina6-2011
10476928	20703	AB017157 // Cst9 // cystatin 9 // 2|2 H1 // 13013 /// AB017157 // Cst9 // cystatin 9 //	Cst9	AB017157	4.98677	4.98677	SGGFPa6-2010 up vs IFskina6-2010	5.16508	5.16508	SGGFPa6-2011 up vs IFskina6-2011
10586180	32842	NM_033607 // Uchl4 // ubiquitin carboxyl-terminal esterase L4 // 9 C|9 35.0 cM // 93841	Uchl4	NM_033607	4.97091	4.97091	SGGFPa6-2010 up vs IFskina6-2010	2.40817	2.40817	SGGFPa6-2011 up vs IFskina6-2011
10407319	13184	NM_001005859 // Rpl34 // ribosomal protein L34 // 3 G3|3 // 68436 /// NM_026724 // Rpl3	Rpl34	NM_001005859	4.96919	4.96919	SGGFPa6-2010 up vs IFskina6-2010	2.54756	2.54756	SGGFPa6-2011 up vs IFskina6-2011
10354506	7620	NM_133829 // Mfsd6 // major facilitator superfamily domain containing 6 // 1 C1.1|1 //	Mfsd6	NM_133829	4.96211	4.96211	SGGFPa6-2010 up vs IFskina6-2010	3.91399	3.91399	SGGFPa6-2011 up vs IFskina6-2011
10587323	32935	NM_008181 // Gsta1 // glutathione S-transferase, alpha 1 (Ya) // 9 E1|9 43.0 cM // 1485	Gsta1	NM_008181	4.95987	4.95987	SGGFPa6-2010 up vs IFskina6-2010	3.37432	3.37432	SGGFPa6-2011 up vs IFskina6-2011
10561008	29832	NM_001039185 // Ceacam1 // carcinoembryonic antigen-related cell adhesion molecule 1 //	Ceacam1	NM_001039185	4.95596	4.95596	SGGFPa6-2010 up vs IFskina6-2010	6.38172	6.38172	SGGFPa6-2011 up vs IFskina6-2011
10496159	22704	NM_027927 // Ints12 // integrator complex subunit 12 // 3|3 H2 // 71793 /// ENSMUST0000	Ints12	NM_027927	4.92708	4.92708	SGGFPa6-2010 up vs IFskina6-2010	2.32763	2.32763	SGGFPa6-2011 up vs IFskina6-2011
10599951	34301	BC024574 // 1110012L19Rik // RIKEN cDNA 1110012L19 gene // X A7.1|X // 68618 /// NM_026	1110012L19Rik	BC024574	4.90793	4.90793	SGGFPa6-2010 up vs IFskina6-2010	3.21331	3.21331	SGGFPa6-2011 up vs IFskina6-2011
10500614	23230	NM_010763 // Man1a2 // mannosidase, alpha, class 1A, member 2 // 3 F2.2|3 // 17156 ///	Man1a2	NM_010763	4.90351	4.90351	SGGFPa6-2010 up vs IFskina6-2010	2.55535	2.55535	SGGFPa6-2011 up vs IFskina6-2011
10571114	31168	NM_153592 // Erlin2 // ER lipid raft associated 2 // 8 A2|8 // 244373 /// ENSMUST000000	Erlin2	NM_153592	4.87418	4.87418	SGGFPa6-2010 up vs IFskina6-2010	2.88732	2.88732	SGGFPa6-2011 up vs IFskina6-2011
10378059	10087	NM_026559 // Txndc17 // thioredoxin domain containing 17 // 11 B4|11 38.0 cM // 52700 /	Txndc17	NM_026559	4.86853	4.86853	SGGFPa6-2010 up vs IFskina6-2010	2.77721	2.77721	SGGFPa6-2011 up vs IFskina6-2011
10395259	11788	NM_021524 // Nampt // nicotinamide phosphoribosyltransferase // 12|12 B1 // 59027 /// E	Nampt	NM_021524	4.84041	4.84041	SGGFPa6-2010 up vs IFskina6-2010	3.96913	3.96913	SGGFPa6-2011 up vs IFskina6-2011				Cytoskeleton
10527638	26063	NM_009663 // Alox5ap // arachidonate 5-lipoxygenase activating protein // 5 G3|5 // 116	Alox5ap	NM_009663	4.84015	4.84015	SGGFPa6-2010 up vs IFskina6-2010	3.87885	3.87885	SGGFPa6-2011 up vs IFskina6-2011				Cytoskeleton
10511755	24420	NM_177327 // Wwp1 // WW domain containing E3 ubiquitin protein ligase 1 // 4 A3|4 // 10	Wwp1	NM_177327	4.81836	4.81836	SGGFPa6-2010 up vs IFskina6-2010	2.6114	2.6114	SGGFPa6-2011 up vs IFskina6-2011
10360120	8197	NM_025388 // Ufc1 // ubiquitin-fold modifier conjugating enzyme 1 // 1 H3|1 93.0 cM //	Ufc1	NM_025388	4.81694	4.81694	SGGFPa6-2010 up vs IFskina6-2010	2.78322	2.78322	SGGFPa6-2011 up vs IFskina6-2011
10478012	20814	NM_011665 // Ube2i // ubiquitin-conjugating enzyme E2I // 17 A3.3|17 // 22196 /// NM_00	Ube2i	NM_011665	4.8165	4.8165	SGGFPa6-2010 up vs IFskina6-2010	2.02432	2.02432	SGGFPa6-2011 up vs IFskina6-2011
10595723	33778	NM_001114977 // 2610101N10Rik // RIKEN cDNA 2610101N10 gene // 9|9 E4 // 67958 /// NM_0	2610101N10Rik	NM_001114977	4.78787	4.78787	SGGFPa6-2010 up vs IFskina6-2010	3.37284	3.37284	SGGFPa6-2011 up vs IFskina6-2011
10407481	13206	NM_019703 // Pfkp // phosphofructokinase, platelet // 13 A1|13 // 56421 /// ENSMUST0000	Pfkp	NM_019703	4.78094	4.78094	SGGFPa6-2010 up vs IFskina6-2010	2.90213	2.90213	SGGFPa6-2011 up vs IFskina6-2011
10503109	23484	NM_181391 // Chchd7 // coiled-coil-helix-coiled-coil-helix domain containing 7 // 4 A1|	Chchd7	NM_181391	4.78027	4.78027	SGGFPa6-2010 up vs IFskina6-2010	3.4189	3.4189	SGGFPa6-2011 up vs IFskina6-2011				Cytoskeleton
10464572	19374	NM_133666 // Ndufv1 // NADH dehydrogenase (ubiquinone) flavoprotein 1 // 19 A|19 // 179	Ndufv1	NM_133666	4.77645	4.77645	SGGFPa6-2010 up vs IFskina6-2010	2.28783	2.28783	SGGFPa6-2011 up vs IFskina6-2011
10494910	22584	NM_026602 // Bcas2 // breast carcinoma amplified sequence 2 // 3 F2.2|3 // 68183 /// EN	Bcas2	NM_026602	4.76867	4.76867	SGGFPa6-2010 up vs IFskina6-2010	2.72978	2.72978	SGGFPa6-2011 up vs IFskina6-2011
10399874	12310	NM_007530 // Bcap29 // B-cell receptor-associated protein 29 // 12 A3|12 17.0 cM // 120	Bcap29	NM_007530	4.76504	4.76504	SGGFPa6-2010 up vs IFskina6-2010	3.91824	3.91824	SGGFPa6-2011 up vs IFskina6-2011
10553993	28998	NM_021336 // Snrpa1 // small nuclear ribonucleoprotein polypeptide A' // 7 C|7 // 68981	Snrpa1	NM_021336	4.71982	4.71982	SGGFPa6-2010 up vs IFskina6-2010	4.37106	4.37106	SGGFPa6-2011 up vs IFskina6-2011				Receptor
10398461	12161	NM_012023 // Ppp2r5c // protein phosphatase 2, regulatory subunit B (B56), gamma isofor	Ppp2r5c	NM_012023	4.71914	4.71914	SGGFPa6-2010 up vs IFskina6-2010	3.01075	3.01075	SGGFPa6-2011 up vs IFskina6-2011
10480121	21038	NM_024185 // Fam188a // family with sequence similarity 188, member A // 2 A1|2 // 6696	Fam188a	NM_024185	4.70645	4.70645	SGGFPa6-2010 up vs IFskina6-2010	2.19006	2.19006	SGGFPa6-2011 up vs IFskina6-2011
10483548	21311	NM_029280 // Mettl5 // methyltransferase like 5 // 2|2 C3 // 75422 /// NM_009278 // Ssb	Mettl5	NM_029280	4.67129	4.67129	SGGFPa6-2010 up vs IFskina6-2010	2.0991	2.0991	SGGFPa6-2011 up vs IFskina6-2011
10505839	23822	NM_172871 // Klhl9 // kelch-like 9 (Drosophila) // 4 C4|4 // 242521 /// ENSMUST00000094	Klhl9	NM_172871	4.67019	4.67019	SGGFPa6-2010 up vs IFskina6-2010	2.15368	2.15368	SGGFPa6-2011 up vs IFskina6-2011
10397818	12047	NM_016856 // Cpsf2 // cleavage and polyadenylation specific factor 2 // 12|12 F1 // 517	Cpsf2	NM_016856	4.65404	4.65404	SGGFPa6-2010 up vs IFskina6-2010	3.00387	3.00387	SGGFPa6-2011 up vs IFskina6-2011
10354647	7633	ENSMUST00000097739 // Pgap1 // post-GPI attachment to proteins 1 // 1 C1.1|1 // 241062	Pgap1	ENSMUST00000097739	4.61137	4.61137	SGGFPa6-2010 up vs IFskina6-2010	2.01246	2.01246	SGGFPa6-2011 up vs IFskina6-2011
10585599	32775	NM_133976 // Imp3 // IMP3, U3 small nucleolar ribonucleoprotein, homolog (yeast) // 9 B	Imp3	NM_133976	4.60225	4.60225	SGGFPa6-2010 up vs IFskina6-2010	2.30579	2.30579	SGGFPa6-2011 up vs IFskina6-2011
10461721	19068	NM_010821 // Mpeg1 // macrophage expressed gene 1 // 19 A|19 // 17476 /// ENSMUST000000	Mpeg1	NM_010821	4.60019	4.60019	SGGFPa6-2010 up vs IFskina6-2010	2.3083	2.3083	SGGFPa6-2011 up vs IFskina6-2011
10575249	31601	NM_175646 // Txnl4b // thioredoxin-like 4B // 8 D3|8 // 234723 /// ENSMUST00000034159 /	Txnl4b	NM_175646	4.57628	4.57628	SGGFPa6-2010 up vs IFskina6-2010	2.08655	2.08655	SGGFPa6-2011 up vs IFskina6-2011
10586184	32843	NM_025372 // Tipin // timeless interacting protein // 9 D|9 36.0 cM // 66131 /// ENSMUS	Tipin	NM_025372	4.57246	4.57246	SGGFPa6-2010 up vs IFskina6-2010	6.2851	6.2851	SGGFPa6-2011 up vs IFskina6-2011
10478938	20908	NM_011826 // Hax1 // HCLS1 associated X-1 // 3|3 // 23897 /// ENSMUST00000079724 // Hax	Hax1	NM_011826	4.57033	4.57033	SGGFPa6-2010 up vs IFskina6-2010	2.03591	2.03591	SGGFPa6-2011 up vs IFskina6-2011				Protein Transport/Apoptosis
10605370	35000	NM_008621 // Mpp1 // membrane protein, palmitoylated // X A7.3|X 30.48 cM // 17524 ///	Mpp1	NM_008621	4.56207	4.56207	SGGFPa6-2010 up vs IFskina6-2010	2.32299	2.32299	SGGFPa6-2011 up vs IFskina6-2011
10604974	34964	NM_019405 // Cetn2 // centrin 2 // X B|X 28.85 cM // 26370 /// ENSMUST00000114551 // Ce	Cetn2	NM_019405	4.5247	4.5247	SGGFPa6-2010 up vs IFskina6-2010	3.35476	3.35476	SGGFPa6-2011 up vs IFskina6-2011
10399407	12244	NM_012038 // Vsnl1 // visinin-like 1 // 12|12 A2 // 26950 /// ENSMUST00000072299 // Vsn	Vsnl1	NM_012038	4.46353	4.46353	SGGFPa6-2010 up vs IFskina6-2010	2.03098	2.03098	SGGFPa6-2011 up vs IFskina6-2011
10395910	11857	NM_008891 // Pnn // pinin // 12 C1|12 23.0 cM // 18949 /// ENSMUST00000021381 // Pnn //	Pnn	NM_008891	4.45453	4.45453	SGGFPa6-2010 up vs IFskina6-2010	2.78443	2.78443	SGGFPa6-2011 up vs IFskina6-2011
10543114	27698	NM_026632 // Rpa3 // replication protein A3 // 6 A1|6 // 68240 /// ENSMUST00000012627 /	Rpa3	NM_026632	4.44093	4.44093	SGGFPa6-2010 up vs IFskina6-2010	3.01554	3.01554	SGGFPa6-2011 up vs IFskina6-2011
10377368	10025	NM_009080 // Rpl26 // ribosomal protein L26 // 11 B3|11 // 19941 /// ENSMUST00000073471	Rpl26	NM_009080	4.43051	4.43051	SGGFPa6-2010 up vs IFskina6-2010	3.79846	3.79846	SGGFPa6-2011 up vs IFskina6-2011
10599377	34223	NM_021465 // Stag2 // stromal antigen 2 // X A2|X // 20843 /// NM_001077712 // Stag2 //	Stag2	NM_021465	4.42994	4.42994	SGGFPa6-2010 up vs IFskina6-2010	4.51389	4.51389	SGGFPa6-2011 up vs IFskina6-2011
10540544	27412	NM_008188 // Thumpd3 // THUMP domain containing 3 // 6 E3|6 48.7 cM // 14911 /// ENSMUS	Thumpd3	NM_008188	4.42612	4.42612	SGGFPa6-2010 up vs IFskina6-2010	3.67149	3.67149	SGGFPa6-2011 up vs IFskina6-2011
10580370	32134	NM_019794 // Dnaja2 // DnaJ (Hsp40) homolog, subfamily A, member 2 // 8|8 C4 // 56445 /	Dnaja2	NM_019794	4.41742	4.41742	SGGFPa6-2010 up vs IFskina6-2010	3.50897	3.50897	SGGFPa6-2011 up vs IFskina6-2011
10461614	19049	NM_028595 // Ms4a6c // membrane-spanning 4-domains, subfamily A, member 6C // 19 A|19 /	Ms4a6c	NM_028595	4.41055	4.41055	SGGFPa6-2010 up vs IFskina6-2010	3.57294	3.57294	SGGFPa6-2011 up vs IFskina6-2011
10392685	11534	NR_024085 // BC006965 // cDNA sequence BC006965 // 11 E2|11 // 217294	BC006965	NR_024085	4.40677	4.40677	SGGFPa6-2010 up vs IFskina6-2010	2.76008	2.76008	SGGFPa6-2011 up vs IFskina6-2011
10388520	11143	NM_026029 // Glod4 // glyoxalase domain containing 4 // 11 B5|11 // 67201 /// ENSMUST00	Glod4	NM_026029	4.40491	4.40491	SGGFPa6-2010 up vs IFskina6-2010	2.74224	2.74224	SGGFPa6-2011 up vs IFskina6-2011
10440427	16807	NM_025967 // D16Ertd472e // DNA segment, Chr 16, ERATO Doi 472, expressed // 16 C3.1|16	D16Ertd472e	NM_025967	4.4027	4.4027	SGGFPa6-2010 up vs IFskina6-2010	2.80929	2.80929	SGGFPa6-2011 up vs IFskina6-2011
10360794	8276	NM_175127 // Fbxo28 // F-box protein 28 // 1 H5|1 98.7 cM // 67948 /// ENSMUST000000514	Fbxo28	NM_175127	4.39871	4.39871	SGGFPa6-2010 up vs IFskina6-2010	3.27694	3.27694	SGGFPa6-2011 up vs IFskina6-2011
10501690	23340	NM_144902 // Slc35a3 // solute carrier family 35 (UDP-N-acetylglucosamine (UDP-GlcNAc)	Slc35a3	NM_144902	4.33463	4.33463	SGGFPa6-2010 up vs IFskina6-2010	4.13867	4.13867	SGGFPa6-2011 up vs IFskina6-2011
10453429	18190	NM_008838 // Pigf // phosphatidylinositol glycan anchor biosynthesis, class F // 17 E4-	Pigf	NM_008838	4.33068	4.33068	SGGFPa6-2010 up vs IFskina6-2010	2.768	2.768	SGGFPa6-2011 up vs IFskina6-2011
10606689	35179	NM_013898 // Timm8a1 // translocase of inner mitochondrial membrane 8 homolog a1 (yeast	Timm8a1	NM_013898	4.31963	4.31963	SGGFPa6-2010 up vs IFskina6-2010	4.56924	4.56924	SGGFPa6-2011 up vs IFskina6-2011
10566097	30511	NM_022979 // Nup98 // nucleoporin 98 // 7 E2|7 51.5 cM // 269966 /// ENSMUST00000070165	Nup98	NM_022979	4.30882	4.30882	SGGFPa6-2010 up vs IFskina6-2010	2.11499	2.11499	SGGFPa6-2011 up vs IFskina6-2011
10401335	12467	NM_027213 // Med6 // mediator of RNA polymerase II transcription, subunit 6 homolog (ye	Med6	NM_027213	4.303	4.303	SGGFPa6-2010 up vs IFskina6-2010	2.28679	2.28679	SGGFPa6-2011 up vs IFskina6-2011
10526977	26006	NM_133916 // Eif3b // eukaryotic translation initiation factor 3, subunit B // 5 G2|5 8	Eif3b	NM_133916	4.2789	4.2789	SGGFPa6-2010 up vs IFskina6-2010	2.09339	2.09339	SGGFPa6-2011 up vs IFskina6-2011				Notch Signaling Pathway
10405545	12956	NM_028281 // Pcbd2 // pterin 4 alpha carbinolamine dehydratase/dimerization cofactor of	Pcbd2	NM_028281	4.26841	4.26841	SGGFPa6-2010 up vs IFskina6-2010	3.51531	3.51531	SGGFPa6-2011 up vs IFskina6-2011
10414113	13966	NM_001004436 // Wapal // wings apart-like homolog (Drosophila) // 14 B|14 // 218914 ///	Wapal	NM_001004436	4.26208	4.26208	SGGFPa6-2010 up vs IFskina6-2010	5.756	5.756	SGGFPa6-2011 up vs IFskina6-2011
10584891	32706	NM_007503 // Fxyd2 // FXYD domain-containing ion transport regulator 2 // 9|9 B // 1193	Fxyd2	NM_007503	4.26033	4.26033	SGGFPa6-2010 up vs IFskina6-2010	3.02388	3.02388	SGGFPa6-2011 up vs IFskina6-2011
10415119	14156	NM_019402 // Pabpn1 // poly(A) binding protein, nuclear 1 // 14 C3|14 19.5 cM // 54196	Pabpn1	NM_019402	4.23783	4.23783	SGGFPa6-2010 up vs IFskina6-2010	2.456	2.456	SGGFPa6-2011 up vs IFskina6-2011
10605315	34989	NM_025410 // Lage3 // L antigen family, member 3 // X|X A6 // 66192 /// ENSMUST00000015	Lage3	NM_025410	4.19508	4.19508	SGGFPa6-2010 up vs IFskina6-2010	2.8517	2.8517	SGGFPa6-2011 up vs IFskina6-2011
10403765	12726	NM_172120 // Vps41 // vacuolar protein sorting 41 (yeast) // 13 A2|13 9.0 cM // 218035	Vps41	NM_172120	4.16949	4.16949	SGGFPa6-2010 up vs IFskina6-2010	2.01462	2.01462	SGGFPa6-2011 up vs IFskina6-2011
10395831	11847	NM_001037756 // Brms1l // breast cancer metastasis-suppressor 1-like // 12 C1|12 23.0 c	Brms1l	NM_001037756	4.16802	4.16802	SGGFPa6-2010 up vs IFskina6-2010	3.35483	3.35483	SGGFPa6-2011 up vs IFskina6-2011
10550509	28582	NM_009402 // Pglyrp1 // peptidoglycan recognition protein 1 // 7|7 A3 // 21946 /// ENSM	Pglyrp1	NM_009402	4.15158	4.15158	SGGFPa6-2010 up vs IFskina6-2010	3.03605	3.03605	SGGFPa6-2011 up vs IFskina6-2011
10388591	11147	NM_007754 // Cpd // carboxypeptidase D // 11 B5|11 46.0 cM // 12874 /// ENSMUST00000021	Cpd	NM_007754	4.14792	4.14792	SGGFPa6-2010 up vs IFskina6-2010	2.10465	2.10465	SGGFPa6-2011 up vs IFskina6-2011				cytoskeleton
10351404	7290	NM_001039483 // Tmco1 // transmembrane and coiled-coil domains 1 // 1 H2.3|1 // 68944 /	Tmco1	NM_001039483	4.14673	4.14673	SGGFPa6-2010 up vs IFskina6-2010	2.73319	2.73319	SGGFPa6-2011 up vs IFskina6-2011
10365227	8764	NM_018829 // Ap3m1 // adaptor-related protein complex 3, mu 1 subunit // 14 A3|14 2.5 c	Ap3m1	NM_018829	4.13292	4.13292	SGGFPa6-2010 up vs IFskina6-2010	3.73985	3.73985	SGGFPa6-2011 up vs IFskina6-2011
10401309	12462	NM_025461 // Cox16 // COX16 cytochrome c oxidase assembly homolog (S. cerevisiae) // 12	Cox16	NM_025461	4.12197	4.12197	SGGFPa6-2010 up vs IFskina6-2010	2.90129	2.90129	SGGFPa6-2011 up vs IFskina6-2011
10491551	22208	NM_019393 // Exosc9 // exosome component 9 // 3 B|3 // 50911 /// ENSMUST00000029269 //	Exosc9	NM_019393	4.11812	4.11812	SGGFPa6-2010 up vs IFskina6-2010	3.88149	3.88149	SGGFPa6-2011 up vs IFskina6-2011
10434643	16159	NM_011971 // Psmb3 // proteasome (prosome, macropain) subunit, beta type 3 // 11 D|11 5	Psmb3	NM_011971	4.11233	4.11233	SGGFPa6-2010 up vs IFskina6-2010	2.55867	2.55867	SGGFPa6-2011 up vs IFskina6-2011
10368947	9172	NM_172393 // Aim1 // absent in melanoma 1 // 10 B2|10 29.0 cM // 11630 /// ENSMUST00000	Aim1	NM_172393	4.10894	4.10894	SGGFPa6-2010 up vs IFskina6-2010	2.54914	2.54914	SGGFPa6-2011 up vs IFskina6-2011
10605081	34976	NM_012060 // Bcap31 // B-cell receptor-associated protein 31 // X|X A6 // 27061 /// ENS	Bcap31	NM_012060	4.1025	4.1025	SGGFPa6-2010 up vs IFskina6-2010	2.57387	2.57387	SGGFPa6-2011 up vs IFskina6-2011
10472289	20146	NM_011529 // Tank // TRAF family member-associated Nf-kappa B activator // 2 C1.3|2 //	Tank	NM_011529	4.09724	4.09724	SGGFPa6-2010 up vs IFskina6-2010	3.17462	3.17462	SGGFPa6-2011 up vs IFskina6-2011
10607497	35291	NM_011507 // Suclg2 // succinate-Coenzyme A ligase, GDP-forming, beta subunit // 6 D3|6	Suclg2	NM_011507	4.09649	4.09649	SGGFPa6-2010 up vs IFskina6-2010	4.4325	4.4325	SGGFPa6-2011 up vs IFskina6-2011
10379654	10236	NM_001035854 // Ap2b1 // adaptor-related protein complex 2, beta 1 subunit // 11|11 B5	Ap2b1	NM_001035854	4.09306	4.09306	SGGFPa6-2010 up vs IFskina6-2010	2.40542	2.40542	SGGFPa6-2011 up vs IFskina6-2011
10436590	16359	NR_015543 // 2810055G20Rik // RIKEN cDNA 2810055G20 gene // 16 C3.1|16 // 77994	2810055G20Rik	NR_015543	4.08471	4.08471	SGGFPa6-2010 up vs IFskina6-2010	2.03333	2.03333	SGGFPa6-2011 up vs IFskina6-2011
10372534	9497	NM_001037846 // Cnot2 // CCR4-NOT transcription complex, subunit 2 // 10 D2|10 // 72068	Cnot2	NM_001037846	4.07923	4.07923	SGGFPa6-2010 up vs IFskina6-2010	3.1118	3.1118	SGGFPa6-2011 up vs IFskina6-2011
10556576	29329	NM_019772 // 1110004F10Rik // RIKEN cDNA 1110004F10 gene // 7|7 F3 // 56372 /// ENSMUST	1110004F10Rik	NM_019772	4.05916	4.05916	SGGFPa6-2010 up vs IFskina6-2010	3.36357	3.36357	SGGFPa6-2011 up vs IFskina6-2011
10498367	22957	NM_028808 // P2ry13 // purinergic receptor P2Y, G-protein coupled 13 // 3 D|3 // 74191	P2ry13	NM_028808	4.04533	4.04533	SGGFPa6-2010 up vs IFskina6-2010	2.72619	2.72619	SGGFPa6-2011 up vs IFskina6-2011
10543737	27761	NM_017478 // Copg2 // coatomer protein complex, subunit gamma 2 // 6 A3.3|6 // 54160 //	Copg2	NM_017478	4.03911	4.03911	SGGFPa6-2010 up vs IFskina6-2010	2.88413	2.88413	SGGFPa6-2011 up vs IFskina6-2011
10512867	24550	NM_172304 // Tex10 // testis expressed gene 10 // 4 B1|4 // 269536 /// NM_010569 // Inv	Tex10	NM_172304	4.02605	4.02605	SGGFPa6-2010 up vs IFskina6-2010	4.11501	4.11501	SGGFPa6-2011 up vs IFskina6-2011
10456071	18466	NM_001037859 // Csf1r // colony stimulating factor 1 receptor // 18 D|18 30.0 cM // 129	Csf1r	NM_001037859	4.0212	4.0212	SGGFPa6-2010 up vs IFskina6-2010	2.53404	2.53404	SGGFPa6-2011 up vs IFskina6-2011
10564448	30327	NR_003961 // Asb7 // ankyrin repeat and SOCS box-containing 7 // 7 C|7 // 117589 /// NM	Asb7	NR_003961	4.00983	4.00983	SGGFPa6-2010 up vs IFskina6-2010	3.14327	3.14327	SGGFPa6-2011 up vs IFskina6-2011
10514441	24728	NM_177239 // Mysm1 // myb-like, SWIRM and MPN domains 1 // 4 C5|4 // 320713 /// ENSMUST	Mysm1	NM_177239	4.00892	4.00892	SGGFPa6-2010 up vs IFskina6-2010	2.1989	2.1989	SGGFPa6-2011 up vs IFskina6-2011
10509777	24209	NM_183148 // Iffo2 // intermediate filament family orphan 2 // 4 D3|4 // 212632 /// ENS	Iffo2	NM_183148	4.00109	4.00109	SGGFPa6-2010 up vs IFskina6-2010	3.03183	3.03183	SGGFPa6-2011 up vs IFskina6-2011
10540785	27425	NM_133937 // 6720456B07Rik // RIKEN cDNA 6720456B07 gene // 6 E3|6 // 101314 /// ENSMUS	6720456B07Rik	NM_133937	3.99724	3.99724	SGGFPa6-2010 up vs IFskina6-2010	2.54262	2.54262	SGGFPa6-2011 up vs IFskina6-2011
10399214	12220	NM_016676 // Rab10 // RAB10, member RAS oncogene family // 12 A1.1|12 2.0 cM // 19325 /	Rab10	NM_016676	3.99439	3.99439	SGGFPa6-2010 up vs IFskina6-2010	2.03083	2.03083	SGGFPa6-2011 up vs IFskina6-2011
10437023	16428	NM_001045529 // Morc3 // microrchidia 3 // 16 C4|16 // 338467 /// ENSMUST00000044068 //	Morc3	NM_001045529	3.98923	3.98923	SGGFPa6-2010 up vs IFskina6-2010	2.85734	2.85734	SGGFPa6-2011 up vs IFskina6-2011
10472782	20201	NM_026115 // Hat1 // histone aminotransferase 1 // 2 C2|2 // 107435 /// ENSMUST00000112	Hat1	NM_026115	3.98535	3.98535	SGGFPa6-2010 up vs IFskina6-2010	3.79941	3.79941	SGGFPa6-2011 up vs IFskina6-2011
10551496	28718	NM_019458 // Paf1 // Paf1, RNA polymerase II associated factor, homolog (S. cerevisiae)	Paf1	NM_019458	3.97873	3.97873	SGGFPa6-2010 up vs IFskina6-2010	2.80509	2.80509	SGGFPa6-2011 up vs IFskina6-2011
10364675	8708	NM_008162 // Gpx4 // glutathione peroxidase 4 // 10 C1|10 43.0 cM // 625249 /// NM_0010	Gpx4	NM_008162	3.97469	3.97469	SGGFPa6-2010 up vs IFskina6-2010	2.40174	2.40174	SGGFPa6-2011 up vs IFskina6-2011
10553897	28991	NM_172742 // Mtmr10 // myotubularin related protein 10 // 7 C|7 // 233315 /// ENSMUST00	Mtmr10	NM_172742	3.9575	3.9575	SGGFPa6-2010 up vs IFskina6-2010	3.09493	3.09493	SGGFPa6-2011 up vs IFskina6-2011
10410351	13590	BC047145 // AA987161 // expressed sequence AA987161 // 13 B3|13 // 380856	AA987161	BC047145	3.95595	3.95595	SGGFPa6-2010 up vs IFskina6-2010	2.08863	2.08863	SGGFPa6-2011 up vs IFskina6-2011
10538420	27162	NM_180678 // Gars // glycyl-tRNA synthetase // 6 B3|6 32.5 cM // 353172 /// ENSMUST0000	Gars	NM_180678	3.95349	3.95349	SGGFPa6-2010 up vs IFskina6-2010	2.22641	2.22641	SGGFPa6-2011 up vs IFskina6-2011
10344637	6627	NM_133826 // Atp6v1h // ATPase, H+ transporting, lysosomal V1 subunit H // 1 A1|1 // 10	Atp6v1h	NM_133826	3.95237	3.95237	SGGFPa6-2010 up vs IFskina6-2010	2.66933	2.66933	SGGFPa6-2011 up vs IFskina6-2011
10593361	33545	NM_001134902 // AU019823 // expressed sequence AU019823 // 9 A5.3|9 // 270156 /// NM_21	AU019823	NM_001134902	3.95036	3.95036	SGGFPa6-2010 up vs IFskina6-2010	6.03523	6.03523	SGGFPa6-2011 up vs IFskina6-2011
10491279	22184	NM_008857 // Prkci // protein kinase C, iota // 3 A3|3 13.8 cM // 18759 /// ENSMUST0000	Prkci	NM_008857	3.94132	3.94132	SGGFPa6-2010 up vs IFskina6-2010	2.39777	2.39777	SGGFPa6-2011 up vs IFskina6-2011
10535629	26851	NM_001033313 // Pdap1 // PDGFA associated protein 1 // 5 G2|5 // 231887 /// ENSMUST0000	Pdap1	NM_001033313	3.93372	3.93372	SGGFPa6-2010 up vs IFskina6-2010	3.07659	3.07659	SGGFPa6-2011 up vs IFskina6-2011
10478525	20864	NM_026323 // Wfdc2 // WAP four-disulfide core domain 2 // 2 H3|2 // 67701 /// ENSMUST00	Wfdc2	NM_026323	3.92641	3.92641	SGGFPa6-2010 up vs IFskina6-2010	2.49805	2.49805	SGGFPa6-2011 up vs IFskina6-2011
10447629	17580	NM_147155 // Tagap1 // T-cell activation GTPase activating protein 1 // 17 A1|17 // 380	Tagap1	NM_147155	3.90828	3.90828	SGGFPa6-2010 up vs IFskina6-2010	2.03098	2.03098	SGGFPa6-2011 up vs IFskina6-2011
10485607	21620	NM_001123327 // Qser1 // glutamine and serine rich 1 // 2 E2|2 // 99003 /// ENSMUST0000	Qser1	NM_001123327	3.90232	3.90232	SGGFPa6-2010 up vs IFskina6-2010	4.46707	4.46707	SGGFPa6-2011 up vs IFskina6-2011
10457872	18646	NM_139143 // Slc39a6 // solute carrier family 39 (metal ion transporter), member 6 // 1	Slc39a6	NM_139143	3.89742	3.89742	SGGFPa6-2010 up vs IFskina6-2010	4.2162	4.2162	SGGFPa6-2011 up vs IFskina6-2011
10413497	13899	NM_019979 // Selk // selenoprotein K // 14 B|14 // 80795 /// ENSMUST00000112268 // Selk	Selk	NM_019979	3.89514	3.89514	SGGFPa6-2010 up vs IFskina6-2010	8.25595	8.25595	SGGFPa6-2011 up vs IFskina6-2011
10446166	17438	NM_027244 // Ndufa11 // NADH dehydrogenase (ubiquinone) 1 alpha subcomplex 11 // 17|17	Ndufa11	NM_027244	3.88221	3.88221	SGGFPa6-2010 up vs IFskina6-2010	2.13014	2.13014	SGGFPa6-2011 up vs IFskina6-2011
10543239	27711	NM_031198 // Tcfec // transcription factor EC // 6|6 E4-G // 21426 /// ENSMUST000000315	Tcfec	NM_031198	3.87764	3.87764	SGGFPa6-2010 up vs IFskina6-2010	3.13536	3.13536	SGGFPa6-2011 up vs IFskina6-2011
10485963	21675	NM_181416 // Arhgap11a // Rho GTPase activating protein 11A // 2 E4|2 // 228482 /// ENS	Arhgap11a	NM_181416	3.87442	3.87442	SGGFPa6-2010 up vs IFskina6-2010	3.34374	3.34374	SGGFPa6-2011 up vs IFskina6-2011
10401781	12508	NM_011479 // Sptlc2 // serine palmitoyltransferase, long chain base subunit 2 // 12|12	Sptlc2	NM_011479	3.82207	3.82207	SGGFPa6-2010 up vs IFskina6-2010	2.83101	2.83101	SGGFPa6-2011 up vs IFskina6-2011
10605338	34993	NM_008062 // G6pdx // glucose-6-phosphate dehydrogenase X-linked // X A2-A3|X 30.02 cM	G6pdx	NM_008062	3.81656	3.81656	SGGFPa6-2010 up vs IFskina6-2010	3.1769	3.1769	SGGFPa6-2011 up vs IFskina6-2011
10473024	20230	NM_172666 // Agps // alkylglycerone phosphate synthase // 2 C3|2 // 228061 /// ENSMUST0	Agps	NM_172666	3.81437	3.81437	SGGFPa6-2010 up vs IFskina6-2010	3.07827	3.07827	SGGFPa6-2011 up vs IFskina6-2011
10499412	23072	NM_016899 // Rab25 // RAB25, member RAS oncogene family // 3|3 E3-F1 // 53868 /// ENSMU	Rab25	NM_016899	3.81098	3.81098	SGGFPa6-2010 up vs IFskina6-2010	3.54179	3.54179	SGGFPa6-2011 up vs IFskina6-2011
10426891	15374	NM_027334 // Mettl7a1 // methyltransferase like 7A1 // 15|15 F3 // 70152 /// ENSMUST000	Mettl7a1	NM_027334	3.80864	3.80864	SGGFPa6-2010 up vs IFskina6-2010	3.23335	3.23335	SGGFPa6-2011 up vs IFskina6-2011				Apoptosis/Protein Transport
10582699	32380	NM_025615 // 2810004N23Rik // RIKEN cDNA 2810004N23 gene // 8 E2|8 // 66523 /// ENSMUST	2810004N23Rik	NM_025615	3.80818	3.80818	SGGFPa6-2010 up vs IFskina6-2010	3.00028	3.00028	SGGFPa6-2011 up vs IFskina6-2011				Apoptosis/Protein Transport/Receptor
10384662	10752	NM_144514 // Commd1 // COMM domain containing 1 // 11 A3.2|11 12.0 cM // 17846 /// ENSM	Commd1	NM_144514	3.80401	3.80401	SGGFPa6-2010 up vs IFskina6-2010	3.80858	3.80858	SGGFPa6-2011 up vs IFskina6-2011
10474379	20442	NM_145558 // Hadhb // hydroxyacyl-Coenzyme A dehydrogenase/3-ketoacyl-Coenzyme A thiola	Hadhb	NM_145558	3.80317	3.80317	SGGFPa6-2010 up vs IFskina6-2010	2.24279	2.24279	SGGFPa6-2011 up vs IFskina6-2011
10366909	8933	NM_001168292 // R3hdm2 // R3H domain containing 2 // 10 D3|10 // 71750 /// NM_001168293	R3hdm2	NM_001168292	3.79085	3.79085	SGGFPa6-2010 up vs IFskina6-2010	2.52896	2.52896	SGGFPa6-2011 up vs IFskina6-2011
10508405	24090	NM_025452 // Tmem54 // transmembrane protein 54 // 4 D2.2|4 // 66260 /// ENSMUST0000010	Tmem54	NM_025452	3.78126	3.78126	SGGFPa6-2010 up vs IFskina6-2010	3.77884	3.77884	SGGFPa6-2011 up vs IFskina6-2011
10541644	27522	NM_001170395 // Cd163 // CD163 antigen // 6 F2|6 // 93671 /// NM_053094 // Cd163 // CD1	Cd163	NM_001170395	3.76315	3.76315	SGGFPa6-2010 up vs IFskina6-2010	3.06977	3.06977	SGGFPa6-2011 up vs IFskina6-2011
10420348	14737	NM_144842 // Zmym5 // zinc finger, MYM-type 5 // 14 C3|14 // 219105 /// ENSMUST00000039	Zmym5	NM_144842	3.74685	3.74685	SGGFPa6-2010 up vs IFskina6-2010	3.12454	3.12454	SGGFPa6-2011 up vs IFskina6-2011
10502469	23415	NM_019808 // Pdlim5 // PDZ and LIM domain 5 // 3|3 H3 // 56376 /// NM_001190852 // Pdli	Pdlim5	NM_019808	3.74439	3.74439	SGGFPa6-2010 up vs IFskina6-2010	2.42601	2.42601	SGGFPa6-2011 up vs IFskina6-2011				Cytoskeleton
10601421	34481	NM_175442 // A630033H20Rik // RIKEN cDNA A630033H20 gene // X D|X // 213438 /// NM_0011	A630033H20Rik	NM_175442	3.74391	3.74391	SGGFPa6-2010 up vs IFskina6-2010	3.14276	3.14276	SGGFPa6-2011 up vs IFskina6-2011
10608001	35341	NM_012011 // Eif2s3y // eukaryotic translation initiation factor 2, subunit 3, structur	Eif2s3y	NM_012011	3.74054	3.74054	SGGFPa6-2010 up vs IFskina6-2010	2.55922	2.55922	SGGFPa6-2011 up vs IFskina6-2011
10426439	15326	NM_146062 // Pphln1 // periphilin 1 // 15 E3|15 // 223828 /// NM_175363 // Pphln1 // pe	Pphln1	NM_146062	3.73729	3.73729	SGGFPa6-2010 up vs IFskina6-2010	3.78326	3.78326	SGGFPa6-2011 up vs IFskina6-2011
10469110	19826	NM_181399 // Usp6nl // USP6 N-terminal like // 2 A1|2 // 98910 /// NM_001080548 // Usp6	Usp6nl	NM_181399	3.73568	3.73568	SGGFPa6-2010 up vs IFskina6-2010	3.0789	3.0789	SGGFPa6-2011 up vs IFskina6-2011
10434467	16148	NM_134101 // Psmd2 // proteasome (prosome, macropain) 26S subunit, non-ATPase, 2 // 16	Psmd2	NM_134101	3.72889	3.72889	SGGFPa6-2010 up vs IFskina6-2010	4.26241	4.26241	SGGFPa6-2011 up vs IFskina6-2011
10499996	23158	NM_029721 // Snx27 // sorting nexin family member 27 // 3|3 F2 // 76742 /// NM_00108248	Snx27	NM_029721	3.71613	3.71613	SGGFPa6-2010 up vs IFskina6-2010	2.98535	2.98535	SGGFPa6-2011 up vs IFskina6-2011				Signal Transduction
10606301	35123	NM_001190409 // Magt1 // magnesium transporter 1 // X D|X // 67075 /// NM_025952 // Mag	Magt1	NM_001190409	3.70476	3.70476	SGGFPa6-2010 up vs IFskina6-2010	2.05231	2.05231	SGGFPa6-2011 up vs IFskina6-2011				Wnt Signaling Pathway
10427704	15473	NM_030046 // Dnajc21 // DnaJ (Hsp40) homolog, subfamily C, member 21 // 15|15 A2 // 782	Dnajc21	NM_030046	3.70191	3.70191	SGGFPa6-2010 up vs IFskina6-2010	5.63307	5.63307	SGGFPa6-2011 up vs IFskina6-2011
10454912	18341	NM_175375 // Ankhd1 // ankyrin repeat and KH domain containing 1 // 18 B2-B3|18 // 1088	Ankhd1	NM_175375	3.69703	3.69703	SGGFPa6-2010 up vs IFskina6-2010	2.73319	2.73319	SGGFPa6-2011 up vs IFskina6-2011
10372853	9534	NM_019786 // Tbk1 // TANK-binding kinase 1 // 10 D2|10 // 56480 /// ENSMUST00000020316	Tbk1	NM_019786	3.69513	3.69513	SGGFPa6-2010 up vs IFskina6-2010	5.47231	5.47231	SGGFPa6-2011 up vs IFskina6-2011
10466818	19610	NR_033744 // Cbwd1 // COBW domain containing 1 // 19 B|19 // 226043 /// NM_146097 // Cb	Cbwd1	NR_033744	3.69309	3.69309	SGGFPa6-2010 up vs IFskina6-2010	3.79679	3.79679	SGGFPa6-2011 up vs IFskina6-2011
10477370	20755	NM_024214 // Tomm20 // translocase of outer mitochondrial membrane 20 homolog (yeast) /	Tomm20	NM_024214	3.66951	3.66951	SGGFPa6-2010 up vs IFskina6-2010	5.53347	5.53347	SGGFPa6-2011 up vs IFskina6-2011
10415784	14219	NM_001164220 // Trim13 // tripartite motif-containing 13 // 14 D1|14 // 66597 /// NM_02	Trim13	NM_001164220	3.65481	3.65481	SGGFPa6-2010 up vs IFskina6-2010	6.58018	6.58018	SGGFPa6-2011 up vs IFskina6-2011
10454154	18273	NM_030596 // Dsg3 // desmoglein 3 // 18 A2|18 7.04 cM // 13512 /// ENSMUST00000070892 /	Dsg3	NM_030596	3.65036	3.65036	SGGFPa6-2010 up vs IFskina6-2010	2.31648	2.31648	SGGFPa6-2011 up vs IFskina6-2011
10585601	32776	NM_178374 // Snupn // snurportin 1 // 9 B|9 // 66069 /// ENSMUST00000068856 // Snupn //	Snupn	NM_178374	3.63538	3.63538	SGGFPa6-2010 up vs IFskina6-2010	2.84576	2.84576	SGGFPa6-2011 up vs IFskina6-2011				Apoptosis/Cell Cycle
10604630	34899	NM_027409 // Mospd1 // motile sperm domain containing 1 // X|X A4 // 70380 /// ENSMUST0	Mospd1	NM_027409	3.62788	3.62788	SGGFPa6-2010 up vs IFskina6-2010	3.8354	3.8354	SGGFPa6-2011 up vs IFskina6-2011
10607910	35332	NM_010832 // Msl3 // male-specific lethal 3 homolog (Drosophila) // X F5|X // 17692 ///	Msl3	NM_010832	3.61998	3.61998	SGGFPa6-2010 up vs IFskina6-2010	4.70349	4.70349	SGGFPa6-2011 up vs IFskina6-2011
10453830	18245	NM_144860 // Mib1 // mindbomb homolog 1 (Drosophila) // 18 A1|18 // 225164 /// ENSMUST0	Mib1	NM_144860	3.61233	3.61233	SGGFPa6-2010 up vs IFskina6-2010	2.19626	2.19626	SGGFPa6-2011 up vs IFskina6-2011
10572757	31357	NM_023126 // Rab8a // RAB8A, member RAS oncogene family // 8 B3.3|8 33.0 cM // 17274 //	Rab8a	NM_023126	3.59958	3.59958	SGGFPa6-2010 up vs IFskina6-2010	3.26373	3.26373	SGGFPa6-2011 up vs IFskina6-2011
10344750	6643	NM_133220 // Sgk3 // serum/glucocorticoid regulated kinase 3 // 1 A2|1 7.5 cM // 170755	Sgk3	NM_133220	3.59572	3.59572	SGGFPa6-2010 up vs IFskina6-2010	2.60927	2.60927	SGGFPa6-2011 up vs IFskina6-2011				Receptor
10560242	29718	NM_001173550 // C5ar1 // complement component 5a receptor 1 // 7 A2|7 3.9 cM // 12273 /	C5ar1	NM_001173550	3.57766	3.57766	SGGFPa6-2010 up vs IFskina6-2010	2.00725	2.00725	SGGFPa6-2011 up vs IFskina6-2011
10406968	13144	NM_021790 // Cenpk // centromere protein K // 13 D1|13 // 60411 /// NM_181061 // Cenpk	Cenpk	NM_021790	3.56583	3.56583	SGGFPa6-2010 up vs IFskina6-2010	2.72789	2.72789	SGGFPa6-2011 up vs IFskina6-2011
10348201	6983	NM_146112 // Gigyf2 // GRB10 interacting GYF protein 2 // 1 D|1 // 227331 /// NM_001110	Gigyf2	NM_146112	3.56073	3.56073	SGGFPa6-2010 up vs IFskina6-2010	2.56791	2.56791	SGGFPa6-2011 up vs IFskina6-2011
10416464	14305	NM_026083 // Zc3h13 // zinc finger CCCH type containing 13 // 14|14 D2 // 67302 /// ENS	Zc3h13	NM_026083	3.54753	3.54753	SGGFPa6-2010 up vs IFskina6-2010	3.93666	3.93666	SGGFPa6-2011 up vs IFskina6-2011
10599215	34197	NM_007451 // Slc25a5 // solute carrier family 25 (mitochondrial carrier, adenine nucleo	Slc25a5	NM_007451	3.54471	3.54471	SGGFPa6-2010 up vs IFskina6-2010	2.96987	2.96987	SGGFPa6-2011 up vs IFskina6-2011				ion transport and MAPK sig
10349016	7059	NM_173187 // 2310035C23Rik // RIKEN cDNA 2310035C23 gene // 1 D|1 // 227446 /// NM_0293	2310035C23Rik	NM_173187	3.53177	3.53177	SGGFPa6-2010 up vs IFskina6-2010	2.18923	2.18923	SGGFPa6-2011 up vs IFskina6-2011
10553598	28969	NM_001164661 // Cyfip1 // cytoplasmic FMR1 interacting protein 1 // 7|7 B5 // 20430 ///	Cyfip1	NM_001164661	3.52949	3.52949	SGGFPa6-2010 up vs IFskina6-2010	2.39865	2.39865	SGGFPa6-2011 up vs IFskina6-2011
10399605	12271	NM_009615 // Adam17 // a disintegrin and metallopeptidase domain 17 // 12 A1.3|12 3.0 c	Adam17	NM_009615	3.52445	3.52445	SGGFPa6-2010 up vs IFskina6-2010	3.56097	3.56097	SGGFPa6-2011 up vs IFskina6-2011
10447429	17550	NM_001190356 // Gm4832 // predicted gene 4832 // 17 E4|17 // 225058 /// ENSMUST00000072	Gm4832	NM_001190356	3.52184	3.52184	SGGFPa6-2010 up vs IFskina6-2010	2.57169	2.57169	SGGFPa6-2011 up vs IFskina6-2011
10435226	16224	NM_080557 // Snx4 // sorting nexin 4 // 16 B3|16 // 69150 /// ENSMUST00000023502 // Snx	Snx4	NM_080557	3.51917	3.51917	SGGFPa6-2010 up vs IFskina6-2010	2.62518	2.62518	SGGFPa6-2011 up vs IFskina6-2011
10414460	14012	NM_001081430 // Naa30 // N(alpha)-acetyltransferase 30, NatC catalytic subunit // 14 C1	Naa30	NM_001081430	3.51393	3.51393	SGGFPa6-2010 up vs IFskina6-2010	3.55705	3.55705	SGGFPa6-2011 up vs IFskina6-2011				Cytoskeletom
10439566	16690	NM_007508 // Atp6v1a // ATPase, H+ transporting, lysosomal V1 subunit A // 16 B4|16 //	Atp6v1a	NM_007508	3.47962	3.47962	SGGFPa6-2010 up vs IFskina6-2010	2.28779	2.28779	SGGFPa6-2011 up vs IFskina6-2011
10434942	16201	NM_007862 // Dlg1 // discs, large homolog 1 (Drosophila) // 16 B2|16 21.2 cM // 13383 /	Dlg1	NM_007862	3.47293	3.47293	SGGFPa6-2010 up vs IFskina6-2010	3.78392	3.78392	SGGFPa6-2011 up vs IFskina6-2011
10433278	16036	NM_023646 // Dnaja3 // DnaJ (Hsp40) homolog, subfamily A, member 3 // 16 A1|16 2.4 cM /	Dnaja3	NM_023646	3.47241	3.47241	SGGFPa6-2010 up vs IFskina6-2010	2.04826	2.04826	SGGFPa6-2011 up vs IFskina6-2011
10476545	20650	NM_175467 // Sptlc3 // serine palmitoyltransferase, long chain base subunit 3 // 2 F3|2	Sptlc3	NM_175467	3.45773	3.45773	SGGFPa6-2010 up vs IFskina6-2010	3.70068	3.70068	SGGFPa6-2011 up vs IFskina6-2011				Apoptosis/Cell Cycle/Txn
10531133	26406	NM_178700 // Grsf1 // G-rich RNA sequence binding factor 1 // 5 E1|5 48.0 cM // 231413	Grsf1	NM_178700	3.45687	3.45687	SGGFPa6-2010 up vs IFskina6-2010	3.63864	3.63864	SGGFPa6-2011 up vs IFskina6-2011
10500685	23236	NM_144900 // Atp1a1 // ATPase, Na+/K+ transporting, alpha 1 polypeptide // 3 F3|3 48.4	Atp1a1	NM_144900	3.44641	3.44641	SGGFPa6-2010 up vs IFskina6-2010	5.0876	5.0876	SGGFPa6-2011 up vs IFskina6-2011
10549282	28412	NM_019923 // Itpr2 // inositol 1,4,5-triphosphate receptor 2 // 6 G3|6 73.0 cM // 16439	Itpr2	NM_019923	3.44464	3.44464	SGGFPa6-2010 up vs IFskina6-2010	3.617	3.617	SGGFPa6-2011 up vs IFskina6-2011
10404630	12863	NM_024242 // Riok1 // RIO kinase 1 (yeast) // 13 A3.3|13 // 71340 /// ENSMUST0000002186	Riok1	NM_024242	3.44233	3.44233	SGGFPa6-2010 up vs IFskina6-2010	3.06213	3.06213	SGGFPa6-2011 up vs IFskina6-2011
10530910	26383	NM_172712 // Uba6 // ubiquitin-like modifier activating enzyme 6 // 5 E1|5 // 231380 //	Uba6	NM_172712	3.42782	3.42782	SGGFPa6-2010 up vs IFskina6-2010	2.7928	2.7928	SGGFPa6-2011 up vs IFskina6-2011
10573954	31463	NM_027112 // Capns2 // calpain, small subunit 2 // 8 C5|8 // 69543 /// ENSMUST000001049	Capns2	NM_027112	3.41748	3.41748	SGGFPa6-2010 up vs IFskina6-2010	4.52395	4.52395	SGGFPa6-2011 up vs IFskina6-2011
10598107	34039	NM_021466 // Taf1a // TATA box binding protein (Tbp)-associated factor, RNA polymerase	Taf1a	NM_021466	3.41012	3.41012	SGGFPa6-2010 up vs IFskina6-2010	2.26631	2.26631	SGGFPa6-2011 up vs IFskina6-2011
10455656	18422	NM_008292 // Hsd17b4 // hydroxysteroid (17-beta) dehydrogenase 4 // 18 D1|18 // 15488 /	Hsd17b4	NM_008292	3.40752	3.40752	SGGFPa6-2010 up vs IFskina6-2010	3.30815	3.30815	SGGFPa6-2011 up vs IFskina6-2011
10545528	28003	NM_001159616 // Pigp // phosphatidylinositol glycan anchor biosynthesis, class P // 16|	Pigp	NM_001159616	3.40506	3.40506	SGGFPa6-2010 up vs IFskina6-2010	2.47968	2.47968	SGGFPa6-2011 up vs IFskina6-2011
10503680	23573	NM_009316 // Map3k7 // mitogen-activated protein kinase kinase kinase 7 // 4 A5|4 // 26	Map3k7	NM_009316	3.40251	3.40251	SGGFPa6-2010 up vs IFskina6-2010	2.269	2.269	SGGFPa6-2011 up vs IFskina6-2011
10499879	23119	NM_013762 // Rpl3 // ribosomal protein L3 // 15 E1|15 // 27367 /// BC094059 // Rpl3 //	Rpl3	NM_013762	3.39804	3.39804	SGGFPa6-2010 up vs IFskina6-2010	2.45954	2.45954	SGGFPa6-2011 up vs IFskina6-2011
10447167	17525	NM_001171052 // Mta3 // metastasis associated 3 // 17 E4|17 // 116871 /// NM_054082 //	Mta3	NM_001171052	3.39613	3.39613	SGGFPa6-2010 up vs IFskina6-2010	2.22622	2.22622	SGGFPa6-2011 up vs IFskina6-2011
10456891	18545	NM_007505 // Atp5a1 // ATP synthase, H+ transporting, mitochondrial F1 complex, alpha s	Atp5a1	NM_007505	3.38866	3.38866	SGGFPa6-2010 up vs IFskina6-2010	3.04181	3.04181	SGGFPa6-2011 up vs IFskina6-2011
10551426	28709	NM_011762 // Zfp59 // zinc finger protein 59 // 7 A3|7 // 22717 /// ENSMUST00000108332	Zfp59	NM_011762	3.38813	3.38813	SGGFPa6-2010 up vs IFskina6-2010	2.8509	2.8509	SGGFPa6-2011 up vs IFskina6-2011
10543213	27706	NM_175312 // B630005N14Rik // RIKEN cDNA B630005N14 gene // 6 A1|6 // 101148 /// ENSMUS	B630005N14Rik	NM_175312	3.38608	3.38608	SGGFPa6-2010 up vs IFskina6-2010	4.03432	4.03432	SGGFPa6-2011 up vs IFskina6-2011				Cell Cycle/p53 Sig
10477572	20774	NM_029362 // Chmp4b // chromatin modifying protein 4B // 2|2 H2 // 75608 /// ENSMUST000	Chmp4b	NM_029362	3.38225	3.38225	SGGFPa6-2010 up vs IFskina6-2010	2.05774	2.05774	SGGFPa6-2011 up vs IFskina6-2011				Cell Cycle/Txn
10574812	31566	NM_181322 // Ctcf // CCCTC-binding factor // 8 D3|8 // 13018 /// ENSMUST00000005841 //	Ctcf	NM_181322	3.37606	3.37606	SGGFPa6-2010 up vs IFskina6-2010	2.00495	2.00495	SGGFPa6-2011 up vs IFskina6-2011
10372618	9503	NM_177798 // Frs2 // fibroblast growth factor receptor substrate 2 // 10 D2|10 // 32782	Frs2	NM_177798	3.37603	3.37603	SGGFPa6-2010 up vs IFskina6-2010	2.03059	2.03059	SGGFPa6-2011 up vs IFskina6-2011
10414065	13961	NM_013473 // Anxa8 // annexin A8 // 14 B|14 13.0 cM // 11752 /// ENSMUST00000022519 //	Anxa8	NM_013473	3.36928	3.36928	SGGFPa6-2010 up vs IFskina6-2010	3.94915	3.94915	SGGFPa6-2011 up vs IFskina6-2011
10375941	9881	NM_011694 // Vdac1 // voltage-dependent anion channel 1 // 11 B1.3|11 29.0 cM // 22333	Vdac1	NM_011694	3.36734	3.36734	SGGFPa6-2010 up vs IFskina6-2010	2.36724	2.36724	SGGFPa6-2011 up vs IFskina6-2011				Cell Adhesion/Signal
10398695	12175	NM_021516 // Mark3 // MAP/microtubule affinity-regulating kinase 3 // 12 F1|12 // 17169	Mark3	NM_021516	3.36684	3.36684	SGGFPa6-2010 up vs IFskina6-2010	2.68142	2.68142	SGGFPa6-2011 up vs IFskina6-2011				Cell Adhesion/Receptor
10511498	24394	NM_175175 // Plekhf2 // pleckstrin homology domain containing, family F (with FYVE doma	Plekhf2	NM_175175	3.35965	3.35965	SGGFPa6-2010 up vs IFskina6-2010	3.78203	3.78203	SGGFPa6-2011 up vs IFskina6-2011
10368886	9164	ENSMUST00000105502 // Foxo3 // forkhead box O3 // 10 B2|10 30.0 cM // 56484	Foxo3	ENSMUST00000105502	3.34298	3.34298	SGGFPa6-2010 up vs IFskina6-2010	4.48558	4.48558	SGGFPa6-2011 up vs IFskina6-2011
10516640	24981	NM_018799 // Eif3i // eukaryotic translation initiation factor 3, subunit I // 4 D2.2|4	Eif3i	NM_018799	3.3414	3.3414	SGGFPa6-2010 up vs IFskina6-2010	2.71083	2.71083	SGGFPa6-2011 up vs IFskina6-2011
10428579	15579	NM_010162 // Ext1 // exostoses (multiple) 1 // 15 C|15 26.55 cM // 14042 /// ENSMUST000	Ext1	NM_010162	3.33988	3.33988	SGGFPa6-2010 up vs IFskina6-2010	2.01704	2.01704	SGGFPa6-2011 up vs IFskina6-2011				Cell Adhesion/Signal
10397666	12026	NM_029334 // Zc3h14 // zinc finger CCCH type containing 14 // 12|12 F1 // 75553 /// NM_	Zc3h14	NM_029334	3.33889	3.33889	SGGFPa6-2010 up vs IFskina6-2010	2.84223	2.84223	SGGFPa6-2011 up vs IFskina6-2011
10466573	19588	NM_017375 // Ostf1 // osteoclast stimulating factor 1 // 19 B|19 14.0 cM // 20409 /// E	Ostf1	NM_017375	3.33698	3.33698	SGGFPa6-2010 up vs IFskina6-2010	3.38154	3.38154	SGGFPa6-2011 up vs IFskina6-2011
10541614	27513	NM_010819 // Clec4d // C-type lectin domain family 4, member d // 6 F3|6 56.5 cM // 174	Clec4d	NM_010819	3.33606	3.33606	SGGFPa6-2010 up vs IFskina6-2010	6.25476	6.25476	SGGFPa6-2011 up vs IFskina6-2011				p53 Sig/Cell Cycle
10411927	13736	NM_026072 // Cwc27 // CWC27 spliceosome-associated protein homolog (S. cerevisiae) // 1	Cwc27	NM_026072	3.32593	3.32593	SGGFPa6-2010 up vs IFskina6-2010	2.10626	2.10626	SGGFPa6-2011 up vs IFskina6-2011
10416850	14350	NM_022886 // Scel // sciellin // 14|14 E // 64929 /// ENSMUST00000095576 // Scel // sci	Scel	NM_022886	3.32142	3.32142	SGGFPa6-2010 up vs IFskina6-2010	2.571	2.571	SGGFPa6-2011 up vs IFskina6-2011
10394609	11704	NM_018730 // Rpl36 // ribosomal protein L36 // 17 D|17 // 54217 /// BC086914 // Rpl36 /	Rpl36	NM_018730	3.31904	3.31904	SGGFPa6-2010 up vs IFskina6-2010	2.17349	2.17349	SGGFPa6-2011 up vs IFskina6-2011
10546606	28124	NM_011666 // Uba3 // ubiquitin-like modifier activating enzyme 3 // 6 D3|6 // 22200 ///	Uba3	NM_011666	3.31727	3.31727	SGGFPa6-2010 up vs IFskina6-2010	3.90307	3.90307	SGGFPa6-2011 up vs IFskina6-2011
10512709	24535	NM_001009949 // Mcart1 // mitochondrial carrier triple repeat 1 // 4 B1|4 // 230125 ///	Mcart1	NM_001009949	3.31642	3.31642	SGGFPa6-2010 up vs IFskina6-2010	2.15223	2.15223	SGGFPa6-2011 up vs IFskina6-2011
10372750	9524	NM_027994 // Cand1 // cullin associated and neddylation disassociated 1 // 10 D2|10 63.	Cand1	NM_027994	3.31356	3.31356	SGGFPa6-2010 up vs IFskina6-2010	2.62312	2.62312	SGGFPa6-2011 up vs IFskina6-2011				Cell Adhesion/Signal
10397895	12053	NM_025666 // Ubr7 // ubiquitin protein ligase E3 component n-recognin 7 (putative) // 1	Ubr7	NM_025666	3.30578	3.30578	SGGFPa6-2010 up vs IFskina6-2010	2.80685	2.80685	SGGFPa6-2011 up vs IFskina6-2011
10491056	22160	NM_030732 // Tbl1xr1 // transducin (beta)-like 1X-linked receptor 1 // 3 A3|3 // 81004	Tbl1xr1	NM_030732	3.30209	3.30209	SGGFPa6-2010 up vs IFskina6-2010	2.45231	2.45231	SGGFPa6-2011 up vs IFskina6-2011
10412038	13745	NM_145456 // Zswim6 // zinc finger, SWIM domain containing 6 // 13 D2.1|13 // 67263 ///	Zswim6	NM_145456	3.2892	3.2892	SGGFPa6-2010 up vs IFskina6-2010	3.03799	3.03799	SGGFPa6-2011 up vs IFskina6-2011
10544906	27893	NM_026637 // Ggct // gamma-glutamyl cyclotransferase // 6 26.0 cM // 110175 /// ENSMUST	Ggct	NM_026637	3.26455	3.26455	SGGFPa6-2010 up vs IFskina6-2010	2.34333	2.34333	SGGFPa6-2011 up vs IFskina6-2011
10464469	19366	BC089624 // Rpl7a // ribosomal protein L7A // 2 A3|2 18.0 cM // 27176 /// ENSMUST000000	Rpl7a	BC089624	3.2641	3.2641	SGGFPa6-2010 up vs IFskina6-2010	2.26438	2.26438	SGGFPa6-2011 up vs IFskina6-2011
10362294	8431	NM_176837 // Arhgap18 // Rho GTPase activating protein 18 // 10 A4|10 // 73910 /// ENSM	Arhgap18	NM_176837	3.26241	3.26241	SGGFPa6-2010 up vs IFskina6-2010	2.29581	2.29581	SGGFPa6-2011 up vs IFskina6-2011				Cell Cycle/Cytoskeleton
10481540	21167	NM_001177648 // Fnbp1 // formin binding protein 1 // 2 B|2 // 14269 /// NM_001038700 //	Fnbp1	NM_001177648	3.2603	3.2603	SGGFPa6-2010 up vs IFskina6-2010	2.72899	2.72899	SGGFPa6-2011 up vs IFskina6-2011
10499854	23111	NM_011309 // S100a1 // S100 calcium binding protein A1 // 3 F1-F2|3 43.6 cM // 20193 //	S100a1	NM_011309	3.25878	3.25878	SGGFPa6-2010 up vs IFskina6-2010	2.0278	2.0278	SGGFPa6-2011 up vs IFskina6-2011
10392012	11487	NM_145436 // Cdc27 // cell division cycle 27 homolog (S. cerevisiae) // 11 E1|11 63.0 c	Cdc27	NM_145436	3.25677	3.25677	SGGFPa6-2010 up vs IFskina6-2010	2.41357	2.41357	SGGFPa6-2011 up vs IFskina6-2011				Cell Cycle/Cytoskeleton
10351347	7284	NM_011804 // Creg1 // cellular repressor of E1A-stimulated genes 1 // 1 H2.3|1 // 43337	Creg1	NM_011804	3.25334	3.25334	SGGFPa6-2010 up vs IFskina6-2010	2.26261	2.26261	SGGFPa6-2011 up vs IFskina6-2011
10355266	7697	NM_001190985 // Lancl1 // LanC (bacterial lantibiotic synthetase component C)-like 1 //	Lancl1	NM_001190985	3.2525	3.2525	SGGFPa6-2010 up vs IFskina6-2010	3.73829	3.73829	SGGFPa6-2011 up vs IFskina6-2011
10542445	27621	NM_011499 // Strap // serine/threonine kinase receptor associated protein // 6 G1|6 //	Strap	NM_011499	3.25034	3.25034	SGGFPa6-2010 up vs IFskina6-2010	2.04358	2.04358	SGGFPa6-2011 up vs IFskina6-2011
10606178	35105	NR_001463 // Xist // inactive X specific transcripts // X D|X 42.0 cM // 213742 /// NR_	Xist	NR_001463	3.24597	3.24597	SGGFPa6-2010 up vs IFskina6-2010	5.5551	5.5551	SGGFPa6-2011 up vs IFskina6-2011
10587012	32908	NM_001114328 // Ccpg1 // cell cycle progression 1 // 9 D|9 42.0 cM // 72278 /// NM_0281	Ccpg1	NM_001114328	3.2449	3.2449	SGGFPa6-2010 up vs IFskina6-2010	2.0959	2.0959	SGGFPa6-2011 up vs IFskina6-2011
10540391	27397	NM_027296 // Trnt1 // tRNA nucleotidyl transferase, CCA-adding, 1 // 6|6 E2 // 70047 //	Trnt1	NM_027296	3.23984	3.23984	SGGFPa6-2010 up vs IFskina6-2010	3.14518	3.14518	SGGFPa6-2011 up vs IFskina6-2011				Cell Adhesion/ECM
10395389	11804	NM_025312 // Sostdc1 // sclerostin domain containing 1 // 12|12 B2 // 66042 /// ENSMUST	Sostdc1	NM_025312	3.23865	3.23865	SGGFPa6-2010 up vs IFskina6-2010	3.90851	3.90851	SGGFPa6-2011 up vs IFskina6-2011
10456501	18506	NM_026440 // Rnmt // RNA (guanine-7-) methyltransferase // 18|18 E1 // 67897 /// NM_001	Rnmt	NM_026440	3.23607	3.23607	SGGFPa6-2010 up vs IFskina6-2010	2.54302	2.54302	SGGFPa6-2011 up vs IFskina6-2011
10490903	22140	NM_024495 // Car13 // carbonic anhydrase 13 // 3|3 A2 // 71934 /// ENSMUST00000029071 /	Car13	NM_024495	3.2344	3.2344	SGGFPa6-2010 up vs IFskina6-2010	4.12149	4.12149	SGGFPa6-2011 up vs IFskina6-2011
10581625	32268	NM_028018 // 2400003C14Rik // RIKEN cDNA 2400003C14 gene // 8 D3|8 // 71955 /// ENSMUST	2400003C14Rik	NM_028018	3.23309	3.23309	SGGFPa6-2010 up vs IFskina6-2010	2.05514	2.05514	SGGFPa6-2011 up vs IFskina6-2011				Cell Junction/Ion Channel/Signal
10580486	32147	NM_012047 // Brd7 // bromodomain containing 7 // 8|8 C4 // 26992 /// ENSMUST00000034085	Brd7	NM_012047	3.23273	3.23273	SGGFPa6-2010 up vs IFskina6-2010	3.05046	3.05046	SGGFPa6-2011 up vs IFskina6-2011				Cell Junction/Ion Channel/Signal
10475324	20536	NM_009897 // Ckmt1 // creatine kinase, mitochondrial 1, ubiquitous // 2 F1-F3|2 67.6 cM	Ckmt1	NM_009897	3.23085	3.23085	SGGFPa6-2010 up vs IFskina6-2010	4.71923	4.71923	SGGFPa6-2011 up vs IFskina6-2011
10420785	14786	ENSMUST00000089320 // Mtmr9 // myotubularin related protein 9 // 14 D1|14 // 210376	Mtmr9	ENSMUST00000089320	3.22154	3.22154	SGGFPa6-2010 up vs IFskina6-2010	5.00325	5.00325	SGGFPa6-2011 up vs IFskina6-2011
10358698	8068	NM_011277 // Rnf2 // ring finger protein 2 // 1 G2|1 // 19821 /// ENSMUST00000076110 //	Rnf2	NM_011277	3.21974	3.21974	SGGFPa6-2010 up vs IFskina6-2010	2.72832	2.72832	SGGFPa6-2011 up vs IFskina6-2011
10544036	27787	NM_080467 // Atp6v0a4 // ATPase, H+ transporting, lysosomal V0 subunit A4 // 6 B1|6 //	Atp6v0a4	NM_080467	3.21448	3.21448	SGGFPa6-2010 up vs IFskina6-2010	3.03041	3.03041	SGGFPa6-2011 up vs IFskina6-2011
10424825	15168	NM_025567 // Cyc1 // cytochrome c-1 // 15 D3|15 // 66445 /// ENSMUST00000023210 // Cyc1	Cyc1	NM_025567	3.20461	3.20461	SGGFPa6-2010 up vs IFskina6-2010	2.52042	2.52042	SGGFPa6-2011 up vs IFskina6-2011				Apoptosis
10355050	7667	NM_001045513 // Raph1 // Ras association (RalGDS/AF-6) and pleckstrin homology domains	Raph1	NM_001045513	3.20418	3.20418	SGGFPa6-2010 up vs IFskina6-2010	2.97507	2.97507	SGGFPa6-2011 up vs IFskina6-2011
10532305	26537	BC065392 // 4930522L14Rik // RIKEN cDNA 4930522L14 gene // 5 F|5 // 100041734 /// ENSMU	4930522L14Rik	BC065392	3.19807	3.19807	SGGFPa6-2010 up vs IFskina6-2010	11.6101	11.6101	SGGFPa6-2011 up vs IFskina6-2011
10504349	23642	NM_013497 // Creb3 // cAMP responsive element binding protein 3 // 4 B1|4 20.5 cM // 12	Creb3	NM_013497	3.19703	3.19703	SGGFPa6-2010 up vs IFskina6-2010	2.29754	2.29754	SGGFPa6-2011 up vs IFskina6-2011
10542636	27638	NM_183165 // Pyroxd1 // pyridine nucleotide-disulphide oxidoreductase domain 1 // 6 G2|	Pyroxd1	NM_183165	3.19583	3.19583	SGGFPa6-2010 up vs IFskina6-2010	2.49254	2.49254	SGGFPa6-2011 up vs IFskina6-2011
10605729	35052	NM_001044386 // Zfx // zinc finger protein X-linked // X D|X 34.8 cM // 22764 /// NM_01	Zfx	NM_001044386	3.19415	3.19415	SGGFPa6-2010 up vs IFskina6-2010	3.75748	3.75748	SGGFPa6-2011 up vs IFskina6-2011				Cell Junction (Tight)
10503828	23579	NM_175364 // Lyrm2 // LYR motif containing 2 // 4 A5|4 // 108755 /// ENSMUST00000062802	Lyrm2	NM_175364	3.19242	3.19242	SGGFPa6-2010 up vs IFskina6-2010	3.9775	3.9775	SGGFPa6-2011 up vs IFskina6-2011
10357008	7853	NM_013784 // Pign // phosphatidylinositol glycan anchor biosynthesis, class N // 1|1 D	Pign	NM_013784	3.18836	3.18836	SGGFPa6-2010 up vs IFskina6-2010	3.3631	3.3631	SGGFPa6-2011 up vs IFskina6-2011
10593605	33568	NM_027807 // Cul5 // cullin 5 // 9|9 C // 75717 /// NM_001161618 // Cul5 // cullin 5 //	Cul5	NM_027807	3.18576	3.18576	SGGFPa6-2010 up vs IFskina6-2010	3.14389	3.14389	SGGFPa6-2011 up vs IFskina6-2011
10473462	20287	NM_146569 // Olfr1014 // olfactory receptor 1014 // 2 E1|2 // 258562 /// ENSMUST0000007	Olfr1014	NM_146569	3.18576	3.18576	SGGFPa6-2010 up vs IFskina6-2010	2.0576	2.0576	SGGFPa6-2011 up vs IFskina6-2011
10479458	20973	NM_029607 // 2310003C23Rik // RIKEN cDNA 2310003C23 gene // 2 H4|2 // 76425 /// ENSMUST	2310003C23Rik	NM_029607	3.18511	3.18511	SGGFPa6-2010 up vs IFskina6-2010	2.28501	2.28501	SGGFPa6-2011 up vs IFskina6-2011
10594590	33660	NM_019727 // Snx1 // sorting nexin 1 // 9 D|9 // 56440 /// ENSMUST00000034946 // Snx1 /	Snx1	NM_019727	3.18511	3.18511	SGGFPa6-2010 up vs IFskina6-2010	2.01684	2.01684	SGGFPa6-2011 up vs IFskina6-2011
10524314	25753	NM_019640 // Pitpnb // phosphatidylinositol transfer protein, beta // 5 F|5 // 56305 //	Pitpnb	NM_019640	3.17359	3.17359	SGGFPa6-2010 up vs IFskina6-2010	3.26841	3.26841	SGGFPa6-2011 up vs IFskina6-2011
10455602	18419	NM_001081371 // Dmxl1 // Dmx-like 1 // 18 D1|18 // 240283 /// ENSMUST00000041772 // Dmx	Dmxl1	NM_001081371	3.17072	3.17072	SGGFPa6-2010 up vs IFskina6-2010	5.8241	5.8241	SGGFPa6-2011 up vs IFskina6-2011
10452516	18112	NM_001025572 // Ankrd12 // ankyrin repeat domain 12 // 17 E1.1|17 // 106585 /// ENSMUST	Ankrd12	NM_001025572	3.17049	3.17049	SGGFPa6-2010 up vs IFskina6-2010	3.52807	3.52807	SGGFPa6-2011 up vs IFskina6-2011
10407870	13235	NM_029271 // Mrpl32 // mitochondrial ribosomal protein L32 // 13|13 A2 // 75398 /// ENS	Mrpl32	NM_029271	3.17002	3.17002	SGGFPa6-2010 up vs IFskina6-2010	3.63156	3.63156	SGGFPa6-2011 up vs IFskina6-2011
10431637	15878	NM_025815 // Cpne8 // copine VIII // 15|15 F1 // 66871 /// NM_001033851 // Cpne8 // cop	Cpne8	NM_025815	3.16808	3.16808	SGGFPa6-2010 up vs IFskina6-2010	2.56851	2.56851	SGGFPa6-2011 up vs IFskina6-2011
10521813	25490	NM_198326 // Nsfl1c // NSFL1 (p97) cofactor (p47) // 2 G3|2 // 386649 /// ENSMUST000000	Nsfl1c	NM_198326	3.16402	3.16402	SGGFPa6-2010 up vs IFskina6-2010	2.35836	2.35836	SGGFPa6-2011 up vs IFskina6-2011
10490544	22095	NM_173761 // Ythdf1 // YTH domain family 1 // 2 H4|2 // 228994 /// ENSMUST00000037299 /	Ythdf1	NM_173761	3.1597	3.1597	SGGFPa6-2010 up vs IFskina6-2010	3.02348	3.02348	SGGFPa6-2011 up vs IFskina6-2011
10394283	11674	NM_134046 // Cenpo // centromere protein O // 12 A1.1|12 1.0 cM // 52504 /// ENSMUST000	Cenpo	NM_134046	3.14631	3.14631	SGGFPa6-2010 up vs IFskina6-2010	2.58319	2.58319	SGGFPa6-2011 up vs IFskina6-2011
10403511	12707	NM_144835 // Heatr1 // HEAT repeat containing 1 // 13 A1|13 8.0 cM // 217995 /// ENSMUS	Heatr1	NM_144835	3.14506	3.14506	SGGFPa6-2010 up vs IFskina6-2010	2.17741	2.17741	SGGFPa6-2011 up vs IFskina6-2011
10521832	25495	NM_028744 // Pi4k2b // phosphatidylinositol 4-kinase type 2 beta // 5 C1|5 // 67073 ///	Pi4k2b	NM_028744	3.14237	3.14237	SGGFPa6-2010 up vs IFskina6-2010	2.01843	2.01843	SGGFPa6-2011 up vs IFskina6-2011
10547410	28201	NM_053204 // Erc1 // ELKS/RAB6-interacting/CAST family member 1 // 6 F1|6 // 111173 ///	Erc1	NM_053204	3.14015	3.14015	SGGFPa6-2010 up vs IFskina6-2010	2.33868	2.33868	SGGFPa6-2011 up vs IFskina6-2011				Receptor
10502951	23468	NM_007382 // Acadm // acyl-Coenzyme A dehydrogenase, medium chain // 3 H3|3 73.6 cM //	Acadm	NM_007382	3.13748	3.13748	SGGFPa6-2010 up vs IFskina6-2010	3.41908	3.41908	SGGFPa6-2011 up vs IFskina6-2011
10574456	31533	NM_001037841 // Cklf // chemokine-like factor // 8 D3|8 // 75458 /// NM_029295 // Cklf	Cklf	NM_001037841	3.13477	3.13477	SGGFPa6-2010 up vs IFskina6-2010	2.21832	2.21832	SGGFPa6-2011 up vs IFskina6-2011
10477929	20804	NM_026124 // 1110008F13Rik // RIKEN cDNA 1110008F13 gene // 2|2 H2 // 67388 /// NM_0299	1110008F13Rik	NM_026124	3.12993	3.12993	SGGFPa6-2010 up vs IFskina6-2010	2.9382	2.9382	SGGFPa6-2011 up vs IFskina6-2011
10585706	32785	NM_007747 // Cox5a // cytochrome c oxidase, subunit Va // 9 B|9 // 12858 /// ENSMUST000	Cox5a	NM_007747	3.12914	3.12914	SGGFPa6-2010 up vs IFskina6-2010	2.7165	2.7165	SGGFPa6-2011 up vs IFskina6-2011
10571310	31192	NM_009082 // Rpl29 // ribosomal protein L29 // 9|9 F2-F4 // 19944 /// BC081467 // Rpl29	Rpl29	NM_009082	3.12649	3.12649	SGGFPa6-2010 up vs IFskina6-2010	2.04265	2.04265	SGGFPa6-2011 up vs IFskina6-2011
10602166	34586	NM_172782 // Nxt2 // nuclear transport factor 2-like export factor 2 // X F2|X // 23708	Nxt2	NM_172782	3.1238	3.1238	SGGFPa6-2010 up vs IFskina6-2010	3.55619	3.55619	SGGFPa6-2011 up vs IFskina6-2011
10427402	15430	NM_010284 // Ghr // growth hormone receptor // 15 A1|15 4.6 cM // 14600 /// NM_00104817	Ghr	NM_010284	3.11803	3.11803	SGGFPa6-2010 up vs IFskina6-2010	2.0184	2.0184	SGGFPa6-2011 up vs IFskina6-2011
10470788	20000	NM_001113213 // Odf2 // outer dense fiber of sperm tails 2 // 2 B|2 19.0 cM // 18286 //	Odf2	NM_001113213	3.11616	3.11616	SGGFPa6-2010 up vs IFskina6-2010	3.01087	3.01087	SGGFPa6-2011 up vs IFskina6-2011
10506500	23908	NM_183225 // Usp24 // ubiquitin specific peptidase 24 // 4 C7|4 // 329908 /// ENSMUST00	Usp24	NM_183225	3.1107	3.1107	SGGFPa6-2010 up vs IFskina6-2010	2.19239	2.19239	SGGFPa6-2011 up vs IFskina6-2011
10440840	16876	NM_026502 // 1110004E09Rik // RIKEN cDNA 1110004E09 gene // 16 C3.3|16 // 68001 /// ENS	1110004E09Rik	NM_026502	3.10754	3.10754	SGGFPa6-2010 up vs IFskina6-2010	3.28106	3.28106	SGGFPa6-2011 up vs IFskina6-2011
10558723	29529	NM_011875 // Psmd13 // proteasome (prosome, macropain) 26S subunit, non-ATPase, 13 // 7	Psmd13	NM_011875	3.10743	3.10743	SGGFPa6-2010 up vs IFskina6-2010	2.93137	2.93137	SGGFPa6-2011 up vs IFskina6-2011
10436841	16411	NM_008349 // Il10rb // interleukin 10 receptor, beta // 16 C3.3|16 63.11 cM // 16155 //	Il10rb	NM_008349	3.10719	3.10719	SGGFPa6-2010 up vs IFskina6-2010	2.01528	2.01528	SGGFPa6-2011 up vs IFskina6-2011
10428857	15609	NM_001146180 // Mtss1 // metastasis suppressor 1 // 15 D1|15 // 211401 /// NM_144800 //	Mtss1	NM_001146180	3.10391	3.10391	SGGFPa6-2010 up vs IFskina6-2010	2.02306	2.02306	SGGFPa6-2011 up vs IFskina6-2011
10477604	20779	NM_008395 // Itch // itchy, E3 ubiquitin protein ligase // 2 H1|2 89.0 cM // 16396 ///	Itch	NM_008395	3.10374	3.10374	SGGFPa6-2010 up vs IFskina6-2010	3.49821	3.49821	SGGFPa6-2011 up vs IFskina6-2011
10424439	15125	NM_133766 // Efr3a // EFR3 homolog A (S. cerevisiae) // 15 D1|15 // 76740 /// ENSMUST00	Efr3a	NM_133766	3.09171	3.09171	SGGFPa6-2010 up vs IFskina6-2010	3.7695	3.7695	SGGFPa6-2011 up vs IFskina6-2011
10495416	22637	NM_020505 // Vav3 // vav 3 oncogene // 3 G1|3 // 57257 /// NM_146139 // Vav3 // vav 3 o	Vav3	NM_020505	3.09145	3.09145	SGGFPa6-2010 up vs IFskina6-2010	3.68302	3.68302	SGGFPa6-2011 up vs IFskina6-2011
10599335	34218	NM_026902 // Mcts1 // malignant T cell amplified sequence 1 // X|X A2 // 68995 /// ENSM	Mcts1	NM_026902	3.09077	3.09077	SGGFPa6-2010 up vs IFskina6-2010	4.29248	4.29248	SGGFPa6-2011 up vs IFskina6-2011
10573583	31432	NM_010764 // Man2b1 // mannosidase 2, alpha B1 // 8 C2|8 37.0 cM // 17159 /// ENSMUST00	Man2b1	NM_010764	3.09014	3.09014	SGGFPa6-2010 up vs IFskina6-2010	2.1683	2.1683	SGGFPa6-2011 up vs IFskina6-2011
10570634	31101	NM_001039553 // 4930467E23Rik // RIKEN cDNA 4930467E23 gene // 8 A1.3|8 // 626415 /// N	4930467E23Rik	NM_001039553	3.08652	3.08652	SGGFPa6-2010 up vs IFskina6-2010	4.61453	4.61453	SGGFPa6-2011 up vs IFskina6-2011
10364287	8653	NM_019929 // Sumo3 // SMT3 suppressor of mif two 3 homolog 3 (yeast) // 10 C1|10 41.6 c	Sumo3	NM_019929	3.0839	3.0839	SGGFPa6-2010 up vs IFskina6-2010	5.8476	5.8476	SGGFPa6-2011 up vs IFskina6-2011
10546066	28068	NM_133934 // Isy1 // ISY1 splicing factor homolog (S. cerevisiae) // 6|6 D2 // 57905 //	Isy1	NM_133934	3.08385	3.08385	SGGFPa6-2010 up vs IFskina6-2010	3.71761	3.71761	SGGFPa6-2011 up vs IFskina6-2011
10537184	27019	NM_145575 // Cald1 // caldesmon 1 // 6 B1|6 11.5 cM // 109624 /// BC019435 // Cald1 //	Cald1	NM_145575	3.08197	3.08197	SGGFPa6-2010 up vs IFskina6-2010	4.06497	4.06497	SGGFPa6-2011 up vs IFskina6-2011
10454129	18271	NM_181682 // Dsg1b // desmoglein 1 beta // 18 A2|18 7.02 cM // 225256 /// ENSMUST000000	Dsg1b	NM_181682	3.07981	3.07981	SGGFPa6-2010 up vs IFskina6-2010	5.71087	5.71087	SGGFPa6-2011 up vs IFskina6-2011
10484520	21393	NM_001081664 // 4833423E24Rik // RIKEN cDNA 4833423E24 gene // 2 D|2 // 228151 /// ENSM	4833423E24Rik	NM_001081664	3.07847	3.07847	SGGFPa6-2010 up vs IFskina6-2010	4.3238	4.3238	SGGFPa6-2011 up vs IFskina6-2011
10461268	19016	BC047099 // 1810009A15Rik // RIKEN cDNA 1810009A15 gene // 19 A|19 // 66276	1810009A15Rik	BC047099	3.0751	3.0751	SGGFPa6-2010 up vs IFskina6-2010	2.50269	2.50269	SGGFPa6-2011 up vs IFskina6-2011
10400326	12358	NM_025456 // Eapp // E2F-associated phosphoprotein // 12 C1|12 // 66266 /// ENSMUST0000	Eapp	NM_025456	3.0609	3.0609	SGGFPa6-2010 up vs IFskina6-2010	4.68195	4.68195	SGGFPa6-2011 up vs IFskina6-2011
10432897	15989	NM_146063 // Krt79 // keratin 79 // 15 F3|15 // 223917 /// ENSMUST00000023799 // Krt79	Krt79	NM_146063	3.0609	3.0609	SGGFPa6-2010 up vs IFskina6-2010	2.98115	2.98115	SGGFPa6-2011 up vs IFskina6-2011
10440284	16786	BC020029 // 4930453N24Rik // RIKEN cDNA 4930453N24 gene // 16 C1.3|16 // 67609 /// NM_0	4930453N24Rik	BC020029	3.04489	3.04489	SGGFPa6-2010 up vs IFskina6-2010	2.26984	2.26984	SGGFPa6-2011 up vs IFskina6-2011
10434675	16166	NM_001190804 // Dnajb11 // DnaJ (Hsp40) homolog, subfamily B, member 11 // 16 B1|16 //	Dnajb11	NM_001190804	3.03653	3.03653	SGGFPa6-2010 up vs IFskina6-2010	2.66833	2.66833	SGGFPa6-2011 up vs IFskina6-2011
10400718	12408	NM_001135559 // Sos2 // son of sevenless homolog 2 (Drosophila) // 12 C3-D|12 30.0 cM /	Sos2	NM_001135559	3.03457	3.03457	SGGFPa6-2010 up vs IFskina6-2010	2.72421	2.72421	SGGFPa6-2011 up vs IFskina6-2011
10529028	26198	NM_001134692 // Ost4 // oligosaccharyltransferase 4 homolog (S. cerevisiae) // 5 B1|5 /	Ost4	NM_001134692	3.03317	3.03317	SGGFPa6-2010 up vs IFskina6-2010	3.20189	3.20189	SGGFPa6-2011 up vs IFskina6-2011
10562416	29969	NM_009884 // Cebpg // CCAAT/enhancer binding protein (C/EBP), gamma // 7 B1|7 // 12611	Cebpg	NM_009884	3.03223	3.03223	SGGFPa6-2010 up vs IFskina6-2010	2.2704	2.2704	SGGFPa6-2011 up vs IFskina6-2011
10465045	19416	NM_024176 // Drap1 // Dr1 associated protein 1 (negative cofactor 2 alpha) // 19 A|19 /	Drap1	NM_024176	3.02905	3.02905	SGGFPa6-2010 up vs IFskina6-2010	2.1657	2.1657	SGGFPa6-2011 up vs IFskina6-2011				Cell Adhesion/txn/Wnt Signalling
10588243	33026	NM_013649 // Ryk // receptor-like tyrosine kinase // 9 F1|9 61.0 cM // 20187 /// NM_001	Ryk	NM_013649	3.02441	3.02441	SGGFPa6-2010 up vs IFskina6-2010	3.51963	3.51963	SGGFPa6-2011 up vs IFskina6-2011
10587534	32951	NM_199195 // Bckdhb // branched chain ketoacid dehydrogenase E1, beta polypeptide // 9	Bckdhb	NM_199195	3.02023	3.02023	SGGFPa6-2010 up vs IFskina6-2010	2.03834	2.03834	SGGFPa6-2011 up vs IFskina6-2011
10593325	33541	NM_011220 // Pts // 6-pyruvoyl-tetrahydropterin synthase // 9 A5.3|9 // 19286 /// ENSMU	Pts	NM_011220	3.00575	3.00575	SGGFPa6-2010 up vs IFskina6-2010	2.12302	2.12302	SGGFPa6-2011 up vs IFskina6-2011
10559454	29595	NM_011088 // Pira11 // paired-Ig-like receptor A11 // 7 A1|7 // 18724 /// NM_011094 //	Pira11	NM_011088	3.00394	3.00394	SGGFPa6-2010 up vs IFskina6-2010	2.29227	2.29227	SGGFPa6-2011 up vs IFskina6-2011
10377431	10032	NM_009497 // Vamp2 // vesicle-associated membrane protein 2 // 11 B3|11 // 22318 /// EN	Vamp2	NM_009497	3.00386	3.00386	SGGFPa6-2010 up vs IFskina6-2010	4.23785	4.23785	SGGFPa6-2011 up vs IFskina6-2011
10369630	9231	NM_019553 // Ddx21 // DEAD (Asp-Glu-Ala-Asp) box polypeptide 21 // 10 32.0 cM|10 B4-B5.	Ddx21	NM_019553	3.00279	3.00279	SGGFPa6-2010 up vs IFskina6-2010	2.49083	2.49083	SGGFPa6-2011 up vs IFskina6-2011
10489065	21939	NM_180956 // Ndrg3 // N-myc downstream regulated gene 3 // 2 H1|2 // 29812 /// NM_01386	Ndrg3	NM_180956	3.00145	3.00145	SGGFPa6-2010 up vs IFskina6-2010	2.72541	2.72541	SGGFPa6-2011 up vs IFskina6-2011
10548176	28284	NR_027360 // 5930416I19Rik // RIKEN cDNA 5930416I19 gene // 6 F3|6 // 72440 /// NR_0273	5930416I19Rik	NR_027360	3.00008	3.00008	SGGFPa6-2010 up vs IFskina6-2010	2.39675	2.39675	SGGFPa6-2011 up vs IFskina6-2011
10493484	22412	NM_025327 // Krtcap2 // keratinocyte associated protein 2 // 3|3 F2 // 66059 /// ENSMUS	Krtcap2	NM_025327	2.99345	2.99345	SGGFPa6-2010 up vs IFskina6-2010	2.26881	2.26881	SGGFPa6-2011 up vs IFskina6-2011
10359982	8181	NM_001081304 // Atf6 // activating transcription factor 6 // 1 H3|1 85.0 cM // 226641 /	Atf6	NM_001081304	2.98947	2.98947	SGGFPa6-2010 up vs IFskina6-2010	2.55663	2.55663	SGGFPa6-2011 up vs IFskina6-2011
10552418	28845	NM_026695 // Etfb // electron transferring flavoprotein, beta polypeptide // 7 B2|7 23.	Etfb	NM_026695	2.9884	2.9884	SGGFPa6-2010 up vs IFskina6-2010	3.14607	3.14607	SGGFPa6-2011 up vs IFskina6-2011
10362974	8522	NM_172473 // Hace1 // HECT domain and ankyrin repeat containing, E3 ubiquitin protein l	Hace1	NM_172473	2.98835	2.98835	SGGFPa6-2010 up vs IFskina6-2010	2.0716	2.0716	SGGFPa6-2011 up vs IFskina6-2011				Cell Junction
10558029	29457	NM_001029982 // Sec23ip // Sec23 interacting protein // 7 F3|7 61.0 cM // 207352 /// EN	Sec23ip	NM_001029982	2.98834	2.98834	SGGFPa6-2010 up vs IFskina6-2010	2.3567	2.3567	SGGFPa6-2011 up vs IFskina6-2011
10531323	26439	NM_011816 // G3bp2 // GTPase activating protein (SH3 domain) binding protein 2 // 5 E2|	G3bp2	NM_011816	2.97674	2.97674	SGGFPa6-2010 up vs IFskina6-2010	2.25063	2.25063	SGGFPa6-2011 up vs IFskina6-2011
10363007	8526	NM_001146089 // Ascc3 // activating signal cointegrator 1 complex subunit 3 // 10 B3|10	Ascc3	NM_001146089	2.97274	2.97274	SGGFPa6-2010 up vs IFskina6-2010	3.61093	3.61093	SGGFPa6-2011 up vs IFskina6-2011
10495201	22614	NM_026774 // Hbxip // hepatitis B virus x interacting protein // 3|3 F3 // 68576 /// BC	Hbxip	NM_026774	2.97153	2.97153	SGGFPa6-2010 up vs IFskina6-2010	2.14779	2.14779	SGGFPa6-2011 up vs IFskina6-2011
10482712	21255	NM_019667 // Stam2 // signal transducing adaptor molecule (SH3 domain and ITAM motif) 2	Stam2	NM_019667	2.96615	2.96615	SGGFPa6-2010 up vs IFskina6-2010	2.01135	2.01135	SGGFPa6-2011 up vs IFskina6-2011				Receptor
10357191	7873	NM_019933 // Ptpn4 // protein tyrosine phosphatase, non-receptor type 4 // 1 E2|1 41.5	Ptpn4	NM_019933	2.95402	2.95402	SGGFPa6-2010 up vs IFskina6-2010	3.69726	3.69726	SGGFPa6-2011 up vs IFskina6-2011
10599120	34189	NM_001009947 // Dock11 // dedicator of cytokinesis 11 // X A3.2|X // 75974 /// AB116935	Dock11	NM_001009947	2.95397	2.95397	SGGFPa6-2010 up vs IFskina6-2010	3.51389	3.51389	SGGFPa6-2011 up vs IFskina6-2011
10518570	25184	NM_001081274 // Pgd // phosphogluconate dehydrogenase // 4 E2|4 77.6 cM // 110208 /// E	Pgd	NM_001081274	2.95186	2.95186	SGGFPa6-2010 up vs IFskina6-2010	2.1366	2.1366	SGGFPa6-2011 up vs IFskina6-2011
10433228	16031	NM_029738 // Cluap1 // clusterin associated protein 1 // 16 A1|16 // 76779 /// ENSMUST0	Cluap1	NM_029738	2.94477	2.94477	SGGFPa6-2010 up vs IFskina6-2010	2.76982	2.76982	SGGFPa6-2011 up vs IFskina6-2011
10382701	10551	NM_020483 // Sap30bp // SAP30 binding protein // 11 E2|11 // 57230 /// ENSMUST000001409	Sap30bp	NM_020483	2.94198	2.94198	SGGFPa6-2010 up vs IFskina6-2010	2.93896	2.93896	SGGFPa6-2011 up vs IFskina6-2011
10602501	34623	NM_021523 // Huwe1 // HECT, UBA and WWE domain containing 1 // X F3|X // 59026 /// AY77	Huwe1	NM_021523	2.93706	2.93706	SGGFPa6-2010 up vs IFskina6-2010	2.93547	2.93547	SGGFPa6-2011 up vs IFskina6-2011
10487476	21770	NR_015476 // 1500011K16Rik // RIKEN cDNA 1500011K16 gene // 2 F1|2 // 67885 /// BC04855	1500011K16Rik	NR_015476	2.93653	2.93653	SGGFPa6-2010 up vs IFskina6-2010	2.69312	2.69312	SGGFPa6-2011 up vs IFskina6-2011
10417773	14471	NM_001024706 // Gm5458 // predicted gene 5458 // 14 A3|14 // 432825 /// NM_001025085 //	Gm5458	NM_001024706	2.93398	2.93398	SGGFPa6-2010 up vs IFskina6-2010	3.3411	3.3411	SGGFPa6-2011 up vs IFskina6-2011
10436239	16324	NM_173026 // Zbtb11 // zinc finger and BTB domain containing 11 // 16 C1.1|16 // 271377	Zbtb11	NM_173026	2.93301	2.93301	SGGFPa6-2010 up vs IFskina6-2010	2.12243	2.12243	SGGFPa6-2011 up vs IFskina6-2011
10585697	32782	ENSMUST00000085711 // Gm5121 // predicted gene 5121 // 9 B|9 // 330948	Gm5121	ENSMUST00000085711	2.91871	2.91871	SGGFPa6-2010 up vs IFskina6-2010	2.03972	2.03972	SGGFPa6-2011 up vs IFskina6-2011				Txn Regulation
10371307	9387	NM_010914 // Nfyb // nuclear transcription factor-Y beta // 10 C3-D1|10 43.7 cM // 1804	Nfyb	NM_010914	2.91678	2.91678	SGGFPa6-2010 up vs IFskina6-2010	2.68922	2.68922	SGGFPa6-2011 up vs IFskina6-2011				Cell Cycle/Cytoskeleton
10596119	33821	NM_001081122 // Cep63 // centrosomal protein 63 // 9 F1|9 56.0 cM // 28135 /// ENSMUST0	Cep63	NM_001081122	2.9157	2.9157	SGGFPa6-2010 up vs IFskina6-2010	3.01207	3.01207	SGGFPa6-2011 up vs IFskina6-2011
10480329	21057	NM_001190817 // Dnajc1 // DnaJ (Hsp40) homolog, subfamily C, member 1 // 2|2 A2 // 1341	Dnajc1	NM_001190817	2.91379	2.91379	SGGFPa6-2010 up vs IFskina6-2010	2.35252	2.35252	SGGFPa6-2011 up vs IFskina6-2011
10578193	31893	NM_026067 // Eri1 // exoribonuclease 1 // 8|8 B1.1 // 67276 /// ENSMUST00000033927 // E	Eri1	NM_026067	2.91107	2.91107	SGGFPa6-2010 up vs IFskina6-2010	2.96821	2.96821	SGGFPa6-2011 up vs IFskina6-2011
10421488	14840	NM_207636 // Fndc3a // fibronectin type III domain containing 3A // 14 D2|14 42.0 cM //	Fndc3a	NM_207636	2.90836	2.90836	SGGFPa6-2010 up vs IFskina6-2010	6.50999	6.50999	SGGFPa6-2011 up vs IFskina6-2011
10504017	23604	NM_023739 // Nfx1 // nuclear transcription factor, X-box binding 1 // 4 B1|4 19.9 cM //	Nfx1	NM_023739	2.90583	2.90583	SGGFPa6-2010 up vs IFskina6-2010	2.11744	2.11744	SGGFPa6-2011 up vs IFskina6-2011
10497214	22811	NM_001025261 // Tpd52 // tumor protein D52 // 3|3 A1-A2 // 21985 /// NM_001025262 // Tp	Tpd52	NM_001025261	2.90252	2.90252	SGGFPa6-2010 up vs IFskina6-2010	3.62059	3.62059	SGGFPa6-2011 up vs IFskina6-2011
10541803	27539	NM_145979 // Chd4 // chromodomain helicase DNA binding protein 4 // 6 F3|6 58.4 cM // 1	Chd4	NM_145979	2.89896	2.89896	SGGFPa6-2010 up vs IFskina6-2010	2.56442	2.56442	SGGFPa6-2011 up vs IFskina6-2011
10378732	10148	NM_133656 // Crk // v-crk sarcoma virus CT10 oncogene homolog (avian) // 11 A-D|11 44.1	Crk	NM_133656	2.89761	2.89761	SGGFPa6-2010 up vs IFskina6-2010	2.51792	2.51792	SGGFPa6-2011 up vs IFskina6-2011
10372130	9461	NM_175128 // 4930430F08Rik // RIKEN cDNA 4930430F08 gene // 10 D1|10 // 68281 /// NM_14	4930430F08Rik	NM_175128	2.89737	2.89737	SGGFPa6-2010 up vs IFskina6-2010	5.44718	5.44718	SGGFPa6-2011 up vs IFskina6-2011
10598839	34152	NM_133669 // Rp2h // retinitis pigmentosa 2 homolog (human) // X|X A2 // 19889 /// ENSM	Rp2h	NM_133669	2.89517	2.89517	SGGFPa6-2010 up vs IFskina6-2010	3.41742	3.41742	SGGFPa6-2011 up vs IFskina6-2011
10607724	35313	NM_009453 // Zrsr2 // zinc finger (CCCH type), RNA binding motif and serine/arginine ri	Zrsr2	NM_009453	2.86804	2.86804	SGGFPa6-2010 up vs IFskina6-2010	2.75945	2.75945	SGGFPa6-2011 up vs IFskina6-2011
10607346	35256	NM_029836 // Tspyl2 // TSPY-like 2 // X F2|X 64.0 cM // 52808 /// ENSMUST00000044509 //	Tspyl2	NM_029836	2.86676	2.86676	SGGFPa6-2010 up vs IFskina6-2010	2.35027	2.35027	SGGFPa6-2011 up vs IFskina6-2011
10601616	34526	NM_172493 // Diap2 // diaphanous homolog 2 (Drosophila) // X E3|X // 54004 /// ENSMUST0	Diap2	NM_172493	2.85911	2.85911	SGGFPa6-2010 up vs IFskina6-2010	2.53082	2.53082	SGGFPa6-2011 up vs IFskina6-2011
10568568	30886	NM_016978 // Oat // ornithine aminotransferase // 7 F3|7 63.0 cM // 18242 /// ENSMUST00	Oat	NM_016978	2.85281	2.85281	SGGFPa6-2010 up vs IFskina6-2010	3.19093	3.19093	SGGFPa6-2011 up vs IFskina6-2011
10350684	7208	NM_026369 // Arpc5 // actin related protein 2/3 complex, subunit 5 // 1|1 A3 // 67771 /	Arpc5	NM_026369	2.84424	2.84424	SGGFPa6-2010 up vs IFskina6-2010	3.55426	3.55426	SGGFPa6-2011 up vs IFskina6-2011
10598798	34147	NM_009483 // Kdm6a // 4lysine (K)-specific demethylase 6A // X A1.2-A1.3|X 5.5 cM // 22	Kdm6a	NM_009483	2.8398	2.8398	SGGFPa6-2010 up vs IFskina6-2010	2.6582	2.6582	SGGFPa6-2011 up vs IFskina6-2011
10599369	34222	NM_009688 // Xiap // X-linked inhibitor of apoptosis // X|X A3-A5 // 11798 /// ENSMUST0	Xiap	NM_009688	2.83764	2.83764	SGGFPa6-2010 up vs IFskina6-2010	2.53275	2.53275	SGGFPa6-2011 up vs IFskina6-2011				Apoptosis
10539486	27299	NM_008717 // Zfml // zinc finger, matrin-like // 6 C3|6 // 18139 /// NM_001166371 // Zf	Zfml	NM_008717	2.83764	2.83764	SGGFPa6-2010 up vs IFskina6-2010	2.6342	2.6342	SGGFPa6-2011 up vs IFskina6-2011
10552917	28909	ENSMUST00000085364 // 1700039E15Rik // RIKEN cDNA 1700039E15 gene // 7 B4|7 // 76713 //	1700039E15Rik	ENSMUST00000085364	2.83606	2.83606	SGGFPa6-2010 up vs IFskina6-2010	2.96949	2.96949	SGGFPa6-2011 up vs IFskina6-2011
10513818	24646	NM_019641 // Stmn1 // stathmin 1 // 4 D3|4 65.7 cM // 16765 /// ENSMUST00000030636 // S	Stmn1	NM_019641	2.83542	2.83542	SGGFPa6-2010 up vs IFskina6-2010	2.46625	2.46625	SGGFPa6-2011 up vs IFskina6-2011
10580391	32136	NM_028007 // Itfg1 // integrin alpha FG-GAP repeat containing 1 // 8 C4|8 39.0 cM // 71	Itfg1	NM_028007	2.83462	2.83462	SGGFPa6-2010 up vs IFskina6-2010	2.76016	2.76016	SGGFPa6-2011 up vs IFskina6-2011
10528340	26132	NM_009584 // Dnajc2 // DnaJ (Hsp40) homolog, subfamily C, member 2 // 5 A3|5 12.0 cM //	Dnajc2	NM_009584	2.8273	2.8273	SGGFPa6-2010 up vs IFskina6-2010	2.99127	2.99127	SGGFPa6-2011 up vs IFskina6-2011				T cell sig/Cell Junction
10372383	9482	NM_172554 // Zdhhc17 // zinc finger, DHHC domain containing 17 // 10 D1|10 // 320150 //	Zdhhc17	NM_172554	2.82547	2.82547	SGGFPa6-2010 up vs IFskina6-2010	2.06243	2.06243	SGGFPa6-2011 up vs IFskina6-2011
10589087	33097	NM_008924 // Prkar2a // protein kinase, cAMP dependent regulatory, type II alpha // 9 F	Prkar2a	NM_008924	2.82365	2.82365	SGGFPa6-2010 up vs IFskina6-2010	2.51796	2.51796	SGGFPa6-2011 up vs IFskina6-2011
10519324	25256	NM_009873 // Cdk6 // cyclin-dependent kinase 6 // 5 A2-A3|5 1.0 cM // 12571 /// ENSMUST	Cdk6	NM_009873	2.82066	2.82066	SGGFPa6-2010 up vs IFskina6-2010	2.09969	2.09969	SGGFPa6-2011 up vs IFskina6-2011
10383897	10668	NM_010898 // Nf2 // neurofibromatosis 2 // 11 A1|11 0.25 cM // 18016 /// ENSMUST0000010	Nf2	NM_010898	2.82044	2.82044	SGGFPa6-2010 up vs IFskina6-2010	2.1677	2.1677	SGGFPa6-2011 up vs IFskina6-2011
10350777	7222	NM_028250 // Acbd6 // acyl-Coenzyme A binding domain containing 6 // 1 G3|1 // 72482 //	Acbd6	NM_028250	2.82023	2.82023	SGGFPa6-2010 up vs IFskina6-2010	2.17437	2.17437	SGGFPa6-2011 up vs IFskina6-2011
10466963	19630	NM_172836 // 9930021J03Rik // RIKEN cDNA 9930021J03 gene // 19 C1|19 // 240613 /// BC12	9930021J03Rik	NM_172836	2.81904	2.81904	SGGFPa6-2010 up vs IFskina6-2010	2.32946	2.32946	SGGFPa6-2011 up vs IFskina6-2011
10547068	28173	NM_172086 // Rpl32 // ribosomal protein L32 // 6 E3|6 50.5 cM // 19951 /// NM_172086 //	Rpl32	NM_172086	2.81525	2.81525	SGGFPa6-2010 up vs IFskina6-2010	2.01224	2.01224	SGGFPa6-2011 up vs IFskina6-2011				Apoptosis
10421526	14844	NM_009029 // Rb1 // retinoblastoma 1 // 14 D3|14 41.0 cM // 19645 /// ENSMUST0000002270	Rb1	NM_009029	2.80675	2.80675	SGGFPa6-2010 up vs IFskina6-2010	3.076	3.076	SGGFPa6-2011 up vs IFskina6-2011
10518751	25194	NM_009802 // Car6 // carbonic anhydrase 6 // 4 E2|4 // 12353 /// ENSMUST00000030817 //	Car6	NM_009802	2.80635	2.80635	SGGFPa6-2010 up vs IFskina6-2010	3.84022	3.84022	SGGFPa6-2011 up vs IFskina6-2011
10523563	25680	NM_173370 // Cds1 // CDP-diacylglycerol synthase 1 // 5 E4|5 // 74596 /// ENSMUST000000	Cds1	NM_173370	2.80619	2.80619	SGGFPa6-2010 up vs IFskina6-2010	3.33463	3.33463	SGGFPa6-2011 up vs IFskina6-2011
10476939	20706	NM_001142411 // Gm4979 // predicted gene 4979 // 2 G3|2 // 245174 /// NM_001177550 // Z	Gm4979	NM_001142411	2.80323	2.80323	SGGFPa6-2010 up vs IFskina6-2010	3.92288	3.92288	SGGFPa6-2011 up vs IFskina6-2011
10506004	23862	NM_030014 // Hook1 // hook homolog 1 (Drosophila) // 4 C5|4 45.5 cM // 77963 /// ENSMUS	Hook1	NM_030014	2.78835	2.78835	SGGFPa6-2010 up vs IFskina6-2010	5.23387	5.23387	SGGFPa6-2011 up vs IFskina6-2011
10394353	11680	NM_025323 // 0610009D07Rik // RIKEN cDNA 0610009D07 gene // 12 A1.1|12 // 66055 /// ENS	0610009D07Rik	NM_025323	2.78765	2.78765	SGGFPa6-2010 up vs IFskina6-2010	3.50377	3.50377	SGGFPa6-2011 up vs IFskina6-2011
10503882	23586	NM_011884 // Rngtt // RNA guanylyltransferase and 5'-phosphatase // 4 A5|4 // 24018 ///	Rngtt	NM_011884	2.78221	2.78221	SGGFPa6-2010 up vs IFskina6-2010	2.46734	2.46734	SGGFPa6-2011 up vs IFskina6-2011
10385966	10894	NM_013472 // Anxa6 // annexin A6 // 11 B1.3|11 29.5 cM // 11749 /// NM_001110211 // Anx	Anxa6	NM_013472	2.77519	2.77519	SGGFPa6-2010 up vs IFskina6-2010	2.52959	2.52959	SGGFPa6-2011 up vs IFskina6-2011
10484227	21358	NM_175465 // Sestd1 // SEC14 and spectrin domains 1 // 2 C3|2 // 228071 /// ENSMUST0000	Sestd1	NM_175465	2.77311	2.77311	SGGFPa6-2010 up vs IFskina6-2010	3.90373	3.90373	SGGFPa6-2011 up vs IFskina6-2011
10592850	33492	NM_021789 // Trappc4 // trafficking protein particle complex 4 // 9|9 B // 60409 /// EN	Trappc4	NM_021789	2.77309	2.77309	SGGFPa6-2010 up vs IFskina6-2010	2.1623	2.1623	SGGFPa6-2011 up vs IFskina6-2011				Apoptosis
10379779	10249	NM_030096 // Ddx52 // DEAD (Asp-Glu-Ala-Asp) box polypeptide 52 // 11|11 B5 // 78394 //	Ddx52	NM_030096	2.76212	2.76212	SGGFPa6-2010 up vs IFskina6-2010	3.49556	3.49556	SGGFPa6-2011 up vs IFskina6-2011
10509500	24191	NM_010470 // Hp1bp3 // heterochromatin protein 1, binding protein 3 // 4 D3|4 // 15441	Hp1bp3	NM_010470	2.76198	2.76198	SGGFPa6-2010 up vs IFskina6-2010	2.08246	2.08246	SGGFPa6-2011 up vs IFskina6-2011
10534316	26729	NM_033561 // Eif4h // eukaryotic translation initiation factor 4H // 5 G2|5 74.0 cM //	Eif4h	NM_033561	2.7589	2.7589	SGGFPa6-2010 up vs IFskina6-2010	2.01795	2.01795	SGGFPa6-2011 up vs IFskina6-2011				Cell Adhesion
10486029	21680	NM_025675 // Atpbd4 // ATP binding domain 4 // 2|2 E5 // 66632 /// ENSMUST00000102542 /	Atpbd4	NM_025675	2.75357	2.75357	SGGFPa6-2010 up vs IFskina6-2010	2.68047	2.68047	SGGFPa6-2011 up vs IFskina6-2011
10414497	14027	NM_009632 // Parp2 // poly (ADP-ribose) polymerase family, member 2 // 14 C1|14 19.5 cM	Parp2	NM_009632	2.75318	2.75318	SGGFPa6-2010 up vs IFskina6-2010	2.78109	2.78109	SGGFPa6-2011 up vs IFskina6-2011
10440881	16878	NM_026110 // Gcfc1 // GC-rich sequence DNA-binding factor 1 // 16 C3.3|16 // 67367 ///	Gcfc1	NM_026110	2.74642	2.74642	SGGFPa6-2010 up vs IFskina6-2010	2.25091	2.25091	SGGFPa6-2011 up vs IFskina6-2011
10396694	11927	NM_206534 // Churc1 // churchill domain containing 1 // 12 C3|12 // 211151 /// ENSMUST0	Churc1	NM_206534	2.74424	2.74424	SGGFPa6-2010 up vs IFskina6-2010	2.09934	2.09934	SGGFPa6-2011 up vs IFskina6-2011
10451549	18017	ENSMUST00000075152 // Gm4945 // predicted gene 4945 // 17 C|17 // 240110	Gm4945	ENSMUST00000075152	2.74145	2.74145	SGGFPa6-2010 up vs IFskina6-2010	2.00955	2.00955	SGGFPa6-2011 up vs IFskina6-2011				Microtubule
10384811	10772	NM_025740 // Ccdc104 // coiled-coil domain containing 104 // 11|11 A4 // 216618 /// ENS	Ccdc104	NM_025740	2.73902	2.73902	SGGFPa6-2010 up vs IFskina6-2010	2.4413	2.4413	SGGFPa6-2011 up vs IFskina6-2011
10501447	23313	NM_025845 // Prpf38b // PRP38 pre-mRNA processing factor 38 (yeast) domain containing B	Prpf38b	NM_025845	2.73868	2.73868	SGGFPa6-2010 up vs IFskina6-2010	2.06568	2.06568	SGGFPa6-2011 up vs IFskina6-2011
10377508	10037	NM_001024206 // Trappc1 // trafficking protein particle complex 1 // 11 B3|11 37.0 cM /	Trappc1	NM_001024206	2.73425	2.73425	SGGFPa6-2010 up vs IFskina6-2010	4.16749	4.16749	SGGFPa6-2011 up vs IFskina6-2011				Cell Cycle/Txn
10389719	11260	NM_029023 // Scpep1 // serine carboxypeptidase 1 // 11 C|11 // 74617 /// ENSMUST0000000	Scpep1	NM_029023	2.73187	2.73187	SGGFPa6-2010 up vs IFskina6-2010	3.81747	3.81747	SGGFPa6-2011 up vs IFskina6-2011
10467956	19714	NM_028607 // Bloc1s2 // biogenesis of lysosome-related organelles complex-1, subunit 2	Bloc1s2	NM_028607	2.72824	2.72824	SGGFPa6-2010 up vs IFskina6-2010	3.15264	3.15264	SGGFPa6-2011 up vs IFskina6-2011
10406385	13067	NM_138312 // Fam172a // family with sequence similarity 172, member A // 13 C1|13 // 68	Fam172a	NM_138312	2.7271	2.7271	SGGFPa6-2010 up vs IFskina6-2010	3.14994	3.14994	SGGFPa6-2011 up vs IFskina6-2011
10523060	25618	ENSMUST00000068250 // Gm9958 // predicted gene 9958 // --- // 791294	Gm9958	ENSMUST00000068250	2.72685	2.72685	SGGFPa6-2010 up vs IFskina6-2010	2.02866	2.02866	SGGFPa6-2011 up vs IFskina6-2011
10565852	30486	NM_175388 // Rnf169 // ring finger protein 169 // 7 E1|7 // 108937 /// ENSMUST000000808	Rnf169	NM_175388	2.7251	2.7251	SGGFPa6-2010 up vs IFskina6-2010	2.01636	2.01636	SGGFPa6-2011 up vs IFskina6-2011
10489936	22029	NM_009628 // Adnp // activity-dependent neuroprotective protein // 2 H3|2 // 11538 ///	Adnp	NM_009628	2.7197	2.7197	SGGFPa6-2010 up vs IFskina6-2010	3.43575	3.43575	SGGFPa6-2011 up vs IFskina6-2011
10531290	26437	NM_026557 // Rchy1 // ring finger and CHY zinc finger domain containing 1 // 5 E2|5 //	Rchy1	NM_026557	2.71828	2.71828	SGGFPa6-2010 up vs IFskina6-2010	2.99659	2.99659	SGGFPa6-2011 up vs IFskina6-2011
10467907	19711	NM_145502 // Erlin1 // ER lipid raft associated 1 // 19 C3|19 // 226144 /// NM_00116435	Erlin1	NM_145502	2.71548	2.71548	SGGFPa6-2010 up vs IFskina6-2010	2.29227	2.29227	SGGFPa6-2011 up vs IFskina6-2011
10532753	26592	NM_011779 // Coro1c // coronin, actin binding protein 1C // 5 F|5 // 23790 /// ENSMUST0	Coro1c	NM_011779	2.71477	2.71477	SGGFPa6-2010 up vs IFskina6-2010	2.27649	2.27649	SGGFPa6-2011 up vs IFskina6-2011
10599435	34233	NM_177215 // Ocrl // oculocerebrorenal syndrome of Lowe // X A4|X // 320634 /// ENSMUST	Ocrl	NM_177215	2.71378	2.71378	SGGFPa6-2010 up vs IFskina6-2010	2.29801	2.29801	SGGFPa6-2011 up vs IFskina6-2011
10475051	20520	NM_013720 // Mga // MAX gene associated // 2 E5|2 // 29808 /// NM_001164274 // Mga // M	Mga	NM_013720	2.71283	2.71283	SGGFPa6-2010 up vs IFskina6-2010	2.48556	2.48556	SGGFPa6-2011 up vs IFskina6-2011
10512499	24513	NM_009416 // Tpm2 // tropomyosin 2, beta // 4 B1|4 // 22004 /// ENSMUST00000030184 // T	Tpm2	NM_009416	2.71	2.71	SGGFPa6-2010 up vs IFskina6-2010	3.66894	3.66894	SGGFPa6-2011 up vs IFskina6-2011
10408487	13354	NM_025710 // Uqcrfs1 // ubiquinol-cytochrome c reductase, Rieske iron-sulfur polypeptid	Uqcrfs1	NM_025710	2.70964	2.70964	SGGFPa6-2010 up vs IFskina6-2010	2.43328	2.43328	SGGFPa6-2011 up vs IFskina6-2011
10571922	31275	NM_175089 // Nek1 // NIMA (never in mitosis gene a)-related expressed kinase 1 // 8 B3.	Nek1	NM_175089	2.70673	2.70673	SGGFPa6-2010 up vs IFskina6-2010	2.42881	2.42881	SGGFPa6-2011 up vs IFskina6-2011
10562096	29929	NM_027215 // Tmem147 // transmembrane protein 147 // 7 B1|7 // 69804 /// ENSMUST0000000	Tmem147	NM_027215	2.70521	2.70521	SGGFPa6-2010 up vs IFskina6-2010	3.72604	3.72604	SGGFPa6-2011 up vs IFskina6-2011
10485395	21602	NM_020267 // Trim44 // tripartite motif-containing 44 // 2 E2|2 // 80985 /// ENSMUST000	Trim44	NM_020267	2.70505	2.70505	SGGFPa6-2010 up vs IFskina6-2010	2.39704	2.39704	SGGFPa6-2011 up vs IFskina6-2011
10590004	33171	NM_018748 // Golga4 // golgi autoantigen, golgin subfamily a, 4 // 9 F3|9 // 54214 ///	Golga4	NM_018748	2.70478	2.70478	SGGFPa6-2010 up vs IFskina6-2010	2.28259	2.28259	SGGFPa6-2011 up vs IFskina6-2011
10582008	32302	NM_026844 // 2310061C15Rik // RIKEN cDNA 2310061C15 gene // 8 E1|8 // 66531 /// ENSMUST	2310061C15Rik	NM_026844	2.70153	2.70153	SGGFPa6-2010 up vs IFskina6-2010	2.87487	2.87487	SGGFPa6-2011 up vs IFskina6-2011
10604735	34916	NM_011252 // Rbmx // RNA binding motif protein, X chromosome // X A5|X // 19655 /// NM_	Rbmx	NM_011252	2.70057	2.70057	SGGFPa6-2010 up vs IFskina6-2010	3.63647	3.63647	SGGFPa6-2011 up vs IFskina6-2011
10378579	10141	NM_138659 // Prpf8 // pre-mRNA processing factor 8 // 11 B5|11 45.0 cM // 192159 /// EN	Prpf8	NM_138659	2.69593	2.69593	SGGFPa6-2010 up vs IFskina6-2010	3.00101	3.00101	SGGFPa6-2011 up vs IFskina6-2011
10502419	23409	NM_001040690 // Rap1gds1 // RAP1, GTP-GDP dissociation stimulator 1 // 3 H1|3 // 229877	Rap1gds1	NM_001040690	2.69588	2.69588	SGGFPa6-2010 up vs IFskina6-2010	3.03218	3.03218	SGGFPa6-2011 up vs IFskina6-2011
10405535	12954	BC051430 // B230219D22Rik // RIKEN cDNA B230219D22 gene // 13 B1|13 // 78521 /// BC0067	B230219D22Rik	BC051430	2.69508	2.69508	SGGFPa6-2010 up vs IFskina6-2010	2.88814	2.88814	SGGFPa6-2011 up vs IFskina6-2011
10595633	33766	NM_007536 // Bcl2a1d // B-cell leukemia/lymphoma 2 related protein A1d // 9 E3.1|9 // 1	Bcl2a1d	NM_007536	2.69197	2.69197	SGGFPa6-2010 up vs IFskina6-2010	2.10209	2.10209	SGGFPa6-2011 up vs IFskina6-2011
10435470	16242	NM_008465 // Kpna1 // karyopherin (importin) alpha 1 // 16 B4-B5|16 // 16646 /// ENSMUS	Kpna1	NM_008465	2.6909	2.6909	SGGFPa6-2010 up vs IFskina6-2010	2.4458	2.4458	SGGFPa6-2011 up vs IFskina6-2011				ECM
10528484	26142	NM_009274 // Srpk2 // serine/arginine-rich protein specific kinase 2 // 5 A3|5 9.0 cM /	Srpk2	NM_009274	2.69085	2.69085	SGGFPa6-2010 up vs IFskina6-2010	2.58122	2.58122	SGGFPa6-2011 up vs IFskina6-2011				Actin Binding
10385616	10855	NM_172557 // Rufy1 // RUN and FYVE domain containing 1 // 11 B1.3|11 // 216724 /// ENSM	Rufy1	NM_172557	2.67717	2.67717	SGGFPa6-2010 up vs IFskina6-2010	2.43426	2.43426	SGGFPa6-2011 up vs IFskina6-2011
10568461	30873	NM_146218 // Rfwd3 // ring finger and WD repeat domain 3 // 8 E1|8 // 234736 /// ENSMUS	Rfwd3	NM_146218	2.67602	2.67602	SGGFPa6-2010 up vs IFskina6-2010	2.3083	2.3083	SGGFPa6-2011 up vs IFskina6-2011
10401322	12465	NM_025292 // Synj2bp // synaptojanin 2 binding protein // 12 D2|12 38.0 cM // 24071 ///	Synj2bp	NM_025292	2.67257	2.67257	SGGFPa6-2010 up vs IFskina6-2010	2.26478	2.26478	SGGFPa6-2011 up vs IFskina6-2011
10381304	10415	NM_026776 // Vps25 // vacuolar protein sorting 25 (yeast) // 11 D|11 60.0 cM // 28084 /	Vps25	NM_026776	2.67097	2.67097	SGGFPa6-2010 up vs IFskina6-2010	2.06368	2.06368	SGGFPa6-2011 up vs IFskina6-2011
10601192	34451	NM_001081008 // Taf1 // TAF1 RNA polymerase II, TATA box binding protein (TBP)-associat	Taf1	NM_001081008	2.67014	2.67014	SGGFPa6-2010 up vs IFskina6-2010	2.63231	2.63231	SGGFPa6-2011 up vs IFskina6-2011
10572253	31305	NM_027481 // Sugp1 // SURP and G patch domain containing 1 // 8|8 C1 // 70616 /// ENSMU	Sugp1	NM_027481	2.66669	2.66669	SGGFPa6-2010 up vs IFskina6-2010	2.34633	2.34633	SGGFPa6-2011 up vs IFskina6-2011
10346970	6867	NM_011086 // Pikfyve // phosphoinositide kinase, FYVE finger containing // 1 C2|1 // 18	Pikfyve	NM_011086	2.66498	2.66498	SGGFPa6-2010 up vs IFskina6-2010	2.49299	2.49299	SGGFPa6-2011 up vs IFskina6-2011
10578287	31907	NM_011135 // Cnot7 // CCR4-NOT transcription complex, subunit 7 // 8 A4|8 // 18983 ///	Cnot7	NM_011135	2.66432	2.66432	SGGFPa6-2010 up vs IFskina6-2010	3.01997	3.01997	SGGFPa6-2011 up vs IFskina6-2011
10363137	8536	NM_030250 // Nus1 // nuclear undecaprenyl pyrophosphate synthase 1 homolog (S. cerevisi	Nus1	NM_030250	2.66311	2.66311	SGGFPa6-2010 up vs IFskina6-2010	2.12443	2.12443	SGGFPa6-2011 up vs IFskina6-2011
10400515	12379	NM_009147 // Sec23a // SEC23A (S. cerevisiae) // 12 C1|12 // 20334 /// ENSMUST000000213	Sec23a	NM_009147	2.65861	2.65861	SGGFPa6-2010 up vs IFskina6-2010	2.70869	2.70869	SGGFPa6-2011 up vs IFskina6-2011
10440186	16778	NM_174848 // Crybg3 // beta-gamma crystallin domain containing 3 // 16 C1.3|16 // 22427	Crybg3	NM_174848	2.64836	2.64836	SGGFPa6-2010 up vs IFskina6-2010	2.87985	2.87985	SGGFPa6-2011 up vs IFskina6-2011
10432527	15951	NM_028015 // Lass5 // LAG1 homolog, ceramide synthase 5 // 15 F1|15 // 71949 /// ENSMUS	Lass5	NM_028015	2.64645	2.64645	SGGFPa6-2010 up vs IFskina6-2010	2.04024	2.04024	SGGFPa6-2011 up vs IFskina6-2011
10502732	23439	NM_011100 // Prkacb // protein kinase, cAMP dependent, catalytic, beta // 3|3 H3 // 187	Prkacb	NM_011100	2.64408	2.64408	SGGFPa6-2010 up vs IFskina6-2010	2.96632	2.96632	SGGFPa6-2011 up vs IFskina6-2011
10492205	22287	NM_001005509 // Eif2a // eukaryotic translation initiation factor 2a // 3 D|3 37.0 cM /	Eif2a	NM_001005509	2.64348	2.64348	SGGFPa6-2010 up vs IFskina6-2010	3.52596	3.52596	SGGFPa6-2011 up vs IFskina6-2011
10607832	35321	NM_019773 // Rab9 // RAB9, member RAS oncogene family // X F5|X // 56382 /// ENSMUST000	Rab9	NM_019773	2.64294	2.64294	SGGFPa6-2010 up vs IFskina6-2010	2.04486	2.04486	SGGFPa6-2011 up vs IFskina6-2011
10458382	18701	NM_009841 // Cd14 // CD14 antigen // 18 B2|18 31.0 cM // 12475 /// ENSMUST00000061829 /	Cd14	NM_009841	2.63962	2.63962	SGGFPa6-2010 up vs IFskina6-2010	3.0076	3.0076	SGGFPa6-2011 up vs IFskina6-2011
10536620	26971	NM_023626 // Ing3 // inhibitor of growth family, member 3 // 6|6 A3 // 71777 /// ENSMUS	Ing3	NM_023626	2.63497	2.63497	SGGFPa6-2010 up vs IFskina6-2010	2.59273	2.59273	SGGFPa6-2011 up vs IFskina6-2011
10512195	24478	NM_026872 // Ubap2 // ubiquitin-associated protein 2 // 4 A5|4 // 68926 /// ENSMUST0000	Ubap2	NM_026872	2.63164	2.63164	SGGFPa6-2010 up vs IFskina6-2010	2.57563	2.57563	SGGFPa6-2011 up vs IFskina6-2011
10514158	24675	NM_133948 // Psip1 // PC4 and SFRS1 interacting protein 1 // 4 C3|4 // 101739 /// ENSMU	Psip1	NM_133948	2.6295	2.6295	SGGFPa6-2010 up vs IFskina6-2010	2.93761	2.93761	SGGFPa6-2011 up vs IFskina6-2011
10605674	35049	NM_008892 // Pola1 // polymerase (DNA directed), alpha 1 // X C-D|X 34.0 cM // 18968 //	Pola1	NM_008892	2.62791	2.62791	SGGFPa6-2010 up vs IFskina6-2010	2.86419	2.86419	SGGFPa6-2011 up vs IFskina6-2011
10500362	23202	NM_027241 // Polr3gl // polymerase (RNA) III (DNA directed) polypeptide G like // 3 F2.	Polr3gl	NM_027241	2.61966	2.61966	SGGFPa6-2010 up vs IFskina6-2010	3.08783	3.08783	SGGFPa6-2011 up vs IFskina6-2011
10443482	17158	NM_030561 // BC004004 // cDNA sequence BC004004 // 17|17 B1 // 80748 /// ENSMUST0000006	BC004004	NM_030561	2.61897	2.61897	SGGFPa6-2010 up vs IFskina6-2010	3.03901	3.03901	SGGFPa6-2011 up vs IFskina6-2011
10466682	19599	NM_153808 // Smc5 // structural maintenance of chromosomes 5 // 19 B|19 // 226026 /// E	Smc5	NM_153808	2.6171	2.6171	SGGFPa6-2010 up vs IFskina6-2010	2.15349	2.15349	SGGFPa6-2011 up vs IFskina6-2011
10540298	27394	NM_007697 // Chl1 // cell adhesion molecule with homology to L1CAM // 6 E1|6 // 12661 /	Chl1	NM_007697	2.61382	2.61382	SGGFPa6-2010 up vs IFskina6-2010	3.00348	3.00348	SGGFPa6-2011 up vs IFskina6-2011
10434481	16149	NM_145941 // Eif4g1 // eukaryotic translation initiation factor 4, gamma 1 // 16 B1|16	Eif4g1	NM_145941	2.61293	2.61293	SGGFPa6-2010 up vs IFskina6-2010	2.42983	2.42983	SGGFPa6-2011 up vs IFskina6-2011
10605884	35073	NM_052976 // Ophn1 // oligophrenin 1 // X|X C2 // 94190 /// ENSMUST00000033560 // Ophn1	Ophn1	NM_052976	2.60176	2.60176	SGGFPa6-2010 up vs IFskina6-2010	2.04042	2.04042	SGGFPa6-2011 up vs IFskina6-2011
10576403	31703	NM_001029876 // Urb2 // URB2 ribosome biogenesis 2 homolog (S. cerevisiae) // 8 E2|8 //	Urb2	NM_001029876	2.60008	2.60008	SGGFPa6-2010 up vs IFskina6-2010	2.61692	2.61692	SGGFPa6-2011 up vs IFskina6-2011
10608422	35419	NM_001168248 // Rmi1 // RMI1, RecQ mediated genome instability 1, homolog (S. cerevisia	Rmi1	NM_001168248	2.58884	2.58884	SGGFPa6-2010 up vs IFskina6-2010	2.56202	2.56202	SGGFPa6-2011 up vs IFskina6-2011				Apoptosis
10549341	28413	NM_138757 // 4933424B01Rik // RIKEN cDNA 4933424B01 gene // 6 G3|6 // 71177 /// ENSMUST	4933424B01Rik	NM_138757	2.58206	2.58206	SGGFPa6-2010 up vs IFskina6-2010	2.40516	2.40516	SGGFPa6-2011 up vs IFskina6-2011
10523206	25638	NM_019490 // Uso1 // USO1 homolog, vesicle docking protein (yeast) // 5|5 E3 // 56041 /	Uso1	NM_019490	2.58087	2.58087	SGGFPa6-2010 up vs IFskina6-2010	4.58596	4.58596	SGGFPa6-2011 up vs IFskina6-2011
10492757	22351	NM_016784 // Plrg1 // pleiotropic regulator 1, PRL1 homolog (Arabidopsis) // 3 E3|3 //	Plrg1	NM_016784	2.58062	2.58062	SGGFPa6-2010 up vs IFskina6-2010	2.45678	2.45678	SGGFPa6-2011 up vs IFskina6-2011
10573198	31398	NM_018808 // Dnajb1 // DnaJ (Hsp40) homolog, subfamily B, member 1 // 8|8 C3 // 81489 /	Dnajb1	NM_018808	2.5778	2.5778	SGGFPa6-2010 up vs IFskina6-2010	3.72237	3.72237	SGGFPa6-2011 up vs IFskina6-2011
10592942	33503	NM_001081049 // Mll1 // myeloid/lymphoid or mixed-lineage leukemia 1 // 9 A5.2|9 26.0 c	Mll1	NM_001081049	2.57765	2.57765	SGGFPa6-2010 up vs IFskina6-2010	2.28742	2.28742	SGGFPa6-2011 up vs IFskina6-2011
10406953	13143	NM_030731 // Trim23 // tripartite motif-containing 23 // 13 D1|13 // 81003 /// ENSMUST0	Trim23	NM_030731	2.57397	2.57397	SGGFPa6-2010 up vs IFskina6-2010	2.68287	2.68287	SGGFPa6-2011 up vs IFskina6-2011
10407892	13237	NM_001081058 // Cdk13 // cyclin-dependent kinase 13 // 13|13 A3.1 // 69562 /// NM_02711	Cdk13	NM_001081058	2.57262	2.57262	SGGFPa6-2010 up vs IFskina6-2010	4.90077	4.90077	SGGFPa6-2011 up vs IFskina6-2011
10441344	16919	NM_134123 // Rbm16 // RNA binding motif protein 16 // 17 A1|17 // 106583 /// ENSMUST000	Rbm16	NM_134123	2.56901	2.56901	SGGFPa6-2010 up vs IFskina6-2010	2.27734	2.27734	SGGFPa6-2011 up vs IFskina6-2011
10436958	16422	NM_172469 // Clic6 // chloride intracellular channel 6 // 16 C4|16 // 209195 /// ENSMUS	Clic6	NM_172469	2.56812	2.56812	SGGFPa6-2010 up vs IFskina6-2010	3.02586	3.02586	SGGFPa6-2011 up vs IFskina6-2011
10424411	15117	NM_021884 // Tsg101 // tumor susceptibility gene 101 // 7|7 B5 // 22088 /// ENSMUST0000	Tsg101	NM_021884	2.56608	2.56608	SGGFPa6-2010 up vs IFskina6-2010	2.02117	2.02117	SGGFPa6-2011 up vs IFskina6-2011
10404506	12850	NM_009068 // Ripk1 // receptor (TNFRSF)-interacting serine-threonine kinase 1 // 13 A3.	Ripk1	NM_009068	2.56496	2.56496	SGGFPa6-2010 up vs IFskina6-2010	3.20175	3.20175	SGGFPa6-2011 up vs IFskina6-2011
10454093	18264	NM_053161 // Mrpl27 // mitochondrial ribosomal protein L27 // 11 D|11 56.0 cM // 94064	Mrpl27	NM_053161	2.56203	2.56203	SGGFPa6-2010 up vs IFskina6-2010	2.48874	2.48874	SGGFPa6-2011 up vs IFskina6-2011
10433940	16098	NM_011949 // Mapk1 // mitogen-activated protein kinase 1 // 16 A3|16 9.82 cM // 26413 /	Mapk1	NM_011949	2.55758	2.55758	SGGFPa6-2010 up vs IFskina6-2010	2.40516	2.40516	SGGFPa6-2011 up vs IFskina6-2011
10434806	16185	NM_178665 // Lpp // LIM domain containing preferred translocation partner in lipoma //	Lpp	NM_178665	2.55563	2.55563	SGGFPa6-2010 up vs IFskina6-2010	4.71622	4.71622	SGGFPa6-2011 up vs IFskina6-2011				Cytoskeleton
10599498	34238	NM_028276 // Utp14a // UTP14, U3 small nucleolar ribonucleoprotein, homolog A (yeast) /	Utp14a	NM_028276	2.55378	2.55378	SGGFPa6-2010 up vs IFskina6-2010	2.65324	2.65324	SGGFPa6-2011 up vs IFskina6-2011
10477777	20791	NM_025516 // Ergic3 // ERGIC and golgi 3 // 2 H2|2 92.0 cM // 66366 /// ENSMUST00000006	Ergic3	NM_025516	2.55301	2.55301	SGGFPa6-2010 up vs IFskina6-2010	2.45012	2.45012	SGGFPa6-2011 up vs IFskina6-2011
10441115	16904	NM_145125 // Brwd1 // bromodomain and WD repeat domain containing 1 // 16 C4|16 // 9387	Brwd1	NM_145125	2.55246	2.55246	SGGFPa6-2010 up vs IFskina6-2010	2.41443	2.41443	SGGFPa6-2011 up vs IFskina6-2011
10587315	32934	NM_010357 // Gsta4 // glutathione S-transferase, alpha 4 // 9 E1|9 // 14860 /// ENSMUST	Gsta4	NM_010357	2.55154	2.55154	SGGFPa6-2010 up vs IFskina6-2010	3.54166	3.54166	SGGFPa6-2011 up vs IFskina6-2011				Receptor
10478424	20853	NM_018753 // Ywhab // tyrosine 3-monooxygenase/tryptophan 5-monooxygenase activation pr	Ywhab	NM_018753	2.54935	2.54935	SGGFPa6-2010 up vs IFskina6-2010	2.43945	2.43945	SGGFPa6-2011 up vs IFskina6-2011
10508269	24083	NM_030252 // BC003266 // cDNA sequence BC003266 // 4 D2.2|4 // 80284 /// ENSMUST0000004	BC003266	NM_030252	2.54468	2.54468	SGGFPa6-2010 up vs IFskina6-2010	2.18603	2.18603	SGGFPa6-2011 up vs IFskina6-2011				Cytoskeleton
10350136	7167	NM_007791 // Csrp1 // cysteine and glycine-rich protein 1 // 1 E4|1 // 13007 /// ENSMUS	Csrp1	NM_007791	2.54038	2.54038	SGGFPa6-2010 up vs IFskina6-2010	2.39163	2.39163	SGGFPa6-2011 up vs IFskina6-2011
10562548	29982	NM_011274 // C80913 // expressed sequence C80913 // 7 B2|7 // 19777 /// ENSMUST00000085	C80913	NM_011274	2.53352	2.53352	SGGFPa6-2010 up vs IFskina6-2010	4.27669	4.27669	SGGFPa6-2011 up vs IFskina6-2011
10406934	13139	NM_007960 // Etv1 // ets variant gene 1 // 12 A3-B1|12 18.5 cM // 14009 /// NM_00116315	Etv1	NM_007960	2.53185	2.53185	SGGFPa6-2010 up vs IFskina6-2010	2.92262	2.92262	SGGFPa6-2011 up vs IFskina6-2011
10505630	23810	NM_029949 // Snapc3 // small nuclear RNA activating complex, polypeptide 3 // 4 C3|4 //	Snapc3	NM_029949	2.52977	2.52977	SGGFPa6-2010 up vs IFskina6-2010	7.99879	7.99879	SGGFPa6-2011 up vs IFskina6-2011				Receptor
10491835	22243	NM_001040399 // Larp1b // La ribonucleoprotein domain family, member 1B // 3 B|3 // 214	Larp1b	NM_001040399	2.52418	2.52418	SGGFPa6-2010 up vs IFskina6-2010	5.22233	5.22233	SGGFPa6-2011 up vs IFskina6-2011
10479736	20994	NM_025901 // Polr3k // polymerase (RNA) III (DNA directed) polypeptide K // 2 H4|2 // 6	Polr3k	NM_025901	2.51986	2.51986	SGGFPa6-2010 up vs IFskina6-2010	3.28967	3.28967	SGGFPa6-2011 up vs IFskina6-2011
10489246	21955	NM_010658 // Mafb // v-maf musculoaponeurotic fibrosarcoma oncogene family, protein B (	Mafb	NM_010658	2.51624	2.51624	SGGFPa6-2010 up vs IFskina6-2010	2.28028	2.28028	SGGFPa6-2011 up vs IFskina6-2011
10605465	35011	NM_016979 // Prkx // protein kinase, X-linked // X A7.3|X // 19108 /// ENSMUST000000363	Prkx	NM_016979	2.51606	2.51606	SGGFPa6-2010 up vs IFskina6-2010	2.07071	2.07071	SGGFPa6-2011 up vs IFskina6-2011
10455647	18420	NM_134131 // Tnfaip8 // tumor necrosis factor, alpha-induced protein 8 // 18 D1|18 // 1	Tnfaip8	NM_134131	2.51606	2.51606	SGGFPa6-2010 up vs IFskina6-2010	4.11873	4.11873	SGGFPa6-2011 up vs IFskina6-2011
10561837	29905	NM_011980 // Zfp146 // zinc finger protein 146 // 7 B1|7 // 26465 /// BC127038 // Zfp14	Zfp146	NM_011980	2.515	2.515	SGGFPa6-2010 up vs IFskina6-2010	2.73697	2.73697	SGGFPa6-2011 up vs IFskina6-2011
10461497	19039	NM_015735 // Ddb1 // damage specific DNA binding protein 1 // 19 centromere|19 5.0 cM /	Ddb1	NM_015735	2.51485	2.51485	SGGFPa6-2010 up vs IFskina6-2010	2.10518	2.10518	SGGFPa6-2011 up vs IFskina6-2011
10465649	19468	NM_007928 // Mark2 // MAP/microtubule affinity-regulating kinase 2 // 19 B|19 3.0 cM //	Mark2	NM_007928	2.51256	2.51256	SGGFPa6-2010 up vs IFskina6-2010	2.94148	2.94148	SGGFPa6-2011 up vs IFskina6-2011
10577164	31787	NM_019521 // Gas6 // growth arrest specific 6 // 8 A1.1|8 5.0 cM // 14456 /// ENSMUST00	Gas6	NM_019521	2.50962	2.50962	SGGFPa6-2010 up vs IFskina6-2010	4.15238	4.15238	SGGFPa6-2011 up vs IFskina6-2011
10548194	28286	NM_010219 // Fkbp4 // FK506 binding protein 4 // 6 F3|6 // 14228 /// ENSMUST00000032508	Fkbp4	NM_010219	2.5095	2.5095	SGGFPa6-2010 up vs IFskina6-2010	2.97006	2.97006	SGGFPa6-2011 up vs IFskina6-2011
10503551	23559	NM_152825 // Usp45 // ubiquitin specific petidase 45 // 4 A3|4 // 77593 /// ENSMUST0000	Usp45	NM_152825	2.50881	2.50881	SGGFPa6-2010 up vs IFskina6-2010	2.17088	2.17088	SGGFPa6-2011 up vs IFskina6-2011
10506668	23920	NM_145550 // Yipf1 // Yip1 domain family, member 1 // 4 C7|4 // 230584 /// ENSMUST00000	Yipf1	NM_145550	2.50831	2.50831	SGGFPa6-2010 up vs IFskina6-2010	5.24126	5.24126	SGGFPa6-2011 up vs IFskina6-2011
10377927	10076	NM_027445 // Rnf167 // ring finger protein 167 // 11 B4|11 // 70510 /// ENSMUST00000037	Rnf167	NM_027445	2.50734	2.50734	SGGFPa6-2010 up vs IFskina6-2010	2.22876	2.22876	SGGFPa6-2011 up vs IFskina6-2011				Receptor
10479765	21001	NM_022724 // Suv39h2 // suppressor of variegation 3-9 homolog 2 (Drosophila) // 2 A|2 2	Suv39h2	NM_022724	2.5071	2.5071	SGGFPa6-2010 up vs IFskina6-2010	2.38473	2.38473	SGGFPa6-2011 up vs IFskina6-2011
10371830	9424	NM_025914 // Actr6 // ARP6 actin-related protein 6 homolog (yeast) // 10 C2|10 // 67019	Actr6	NM_025914	2.50667	2.50667	SGGFPa6-2010 up vs IFskina6-2010	2.09276	2.09276	SGGFPa6-2011 up vs IFskina6-2011
10391036	11400	NM_008471 // Krt19 // keratin 19 // 11 D|11 58.51 cM // 16669 /// ENSMUST00000007317 //	Krt19	NM_008471	2.5016	2.5016	SGGFPa6-2010 up vs IFskina6-2010	5.19321	5.19321	SGGFPa6-2011 up vs IFskina6-2011
10478341	20841	NM_172150 // Ift52 // intraflagellar transport 52 homolog (Chlamydomonas) // 2 H2|2 //	Ift52	NM_172150	2.49936	2.49936	SGGFPa6-2010 up vs IFskina6-2010	3.44901	3.44901	SGGFPa6-2011 up vs IFskina6-2011
10362036	8394	NM_019702 // Hbs1l // Hbs1-like (S. cerevisiae) // 10 A3|10 // 56422 /// NM_001042593 /	Hbs1l	NM_019702	2.49897	2.49897	SGGFPa6-2010 up vs IFskina6-2010	5.53803	5.53803	SGGFPa6-2011 up vs IFskina6-2011
10452470	18107	NM_013933 // Vapa // vesicle-associated membrane protein, associated protein A // 17|17	Vapa	NM_013933	2.4977	2.4977	SGGFPa6-2010 up vs IFskina6-2010	4.41712	4.41712	SGGFPa6-2011 up vs IFskina6-2011
10595702	33776	NM_001033145 // 1190002N15Rik // RIKEN cDNA 1190002N15 gene // 9 E3.3|9 // 68861 /// EN	1190002N15Rik	NM_001033145	2.49522	2.49522	SGGFPa6-2010 up vs IFskina6-2010	2.18705	2.18705	SGGFPa6-2011 up vs IFskina6-2011
10355967	7753	NM_183027 // Ap1s3 // adaptor-related protein complex AP-1, sigma 3 // 1 C4|1 // 252903	Ap1s3	NM_183027	2.49494	2.49494	SGGFPa6-2010 up vs IFskina6-2010	6.52091	6.52091	SGGFPa6-2011 up vs IFskina6-2011
10516229	24939	NM_026031 // Utp11l // UTP11-like, U3 small nucleolar ribonucleoprotein, (yeast) // 4|4	Utp11l	NM_026031	2.49482	2.49482	SGGFPa6-2010 up vs IFskina6-2010	4.50745	4.50745	SGGFPa6-2011 up vs IFskina6-2011
10445601	17372	NM_010787 // Mea1 // male enhanced antigen 1 // 17 C|17 24.3 cM // 17256 /// ENSMUST000	Mea1	NM_010787	2.49443	2.49443	SGGFPa6-2010 up vs IFskina6-2010	2.02008	2.02008	SGGFPa6-2011 up vs IFskina6-2011
10598528	34098	NM_199066 // Ssxb9 // synovial sarcoma, X member B, breakpoint 9 // X A1.1|X // 387131	Ssxb9	NM_199066	2.49415	2.49415	SGGFPa6-2010 up vs IFskina6-2010	2.65095	2.65095	SGGFPa6-2011 up vs IFskina6-2011
10547153	28180	NM_009662 // Alox5 // arachidonate 5-lipoxygenase // 6 F1|6 53.2 cM // 11689 /// ENSMUS	Alox5	NM_009662	2.49202	2.49202	SGGFPa6-2010 up vs IFskina6-2010	2.40415	2.40415	SGGFPa6-2011 up vs IFskina6-2011				Gap Junction
10509620	24206	NM_001037761 // Capzb // capping protein (actin filament) muscle Z-line, beta // 4 D3|4	Capzb	NM_001037761	2.4908	2.4908	SGGFPa6-2010 up vs IFskina6-2010	2.2314	2.2314	SGGFPa6-2011 up vs IFskina6-2011				Gap Junction
10482139	21224	NM_026176 // Pdcl // phosducin-like // 2 B|2 // 67466 /// ENSMUST00000009174 // Pdcl //	Pdcl	NM_026176	2.49055	2.49055	SGGFPa6-2010 up vs IFskina6-2010	2.5333	2.5333	SGGFPa6-2011 up vs IFskina6-2011
10589004	33089	NM_133794 // Qars // glutaminyl-tRNA synthetase // 9 F2|9 // 97541 /// NM_001168270 //	Qars	NM_133794	2.49016	2.49016	SGGFPa6-2010 up vs IFskina6-2010	2.13049	2.13049	SGGFPa6-2011 up vs IFskina6-2011
10413502	13900	NM_027493 // Actr8 // ARP8 actin-related protein 8 homolog (S. cerevisiae) // 14 B|14 /	Actr8	NM_027493	2.48896	2.48896	SGGFPa6-2010 up vs IFskina6-2010	2.39947	2.39947	SGGFPa6-2011 up vs IFskina6-2011
10503643	23567	NM_026742 // Ndufaf4 // NADH dehydrogenase (ubiquinone) 1 alpha subcomplex, assembly fa	Ndufaf4	NM_026742	2.48604	2.48604	SGGFPa6-2010 up vs IFskina6-2010	2.48714	2.48714	SGGFPa6-2011 up vs IFskina6-2011
10368883	9163	NM_011561 // Tdg // thymine DNA glycosylase // 10 C1|10 43.0 cM // 21665 /// NM_172552	Tdg	NM_011561	2.48225	2.48225	SGGFPa6-2010 up vs IFskina6-2010	2.92785	2.92785	SGGFPa6-2011 up vs IFskina6-2011
10467842	19705	NM_010324 // Got1 // glutamate oxaloacetate transaminase 1, soluble // 19 C3|19 37.0 cM	Got1	NM_010324	2.48218	2.48218	SGGFPa6-2010 up vs IFskina6-2010	3.64843	3.64843	SGGFPa6-2011 up vs IFskina6-2011
10517465	25067	NM_133872 // Kdm1a // lysine (K)-specific demethylase 1A // 4 D3|4 66.75 cM // 99982 //	Kdm1a	NM_133872	2.47926	2.47926	SGGFPa6-2010 up vs IFskina6-2010	2.26862	2.26862	SGGFPa6-2011 up vs IFskina6-2011
10386169	10913	ENSMUST00000065533 // Gm9900 // predicted gene 9900 // --- // 100038519	Gm9900	ENSMUST00000065533	2.47811	2.47811	SGGFPa6-2010 up vs IFskina6-2010	2.10151	2.10151	SGGFPa6-2011 up vs IFskina6-2011
10467230	19662	NM_031156 // Ide // insulin degrading enzyme // 19 C2|19 25.0 cM // 15925 /// BC041675	Ide	NM_031156	2.47649	2.47649	SGGFPa6-2010 up vs IFskina6-2010	3.96754	3.96754	SGGFPa6-2011 up vs IFskina6-2011
10516678	24985	NM_008468 // Kpna6 // karyopherin (importin) alpha 6 // 4|4 D2.3 // 16650 /// ENSMUST00	Kpna6	NM_008468	2.47597	2.47597	SGGFPa6-2010 up vs IFskina6-2010	2.25929	2.25929	SGGFPa6-2011 up vs IFskina6-2011
10428955	15622	NM_001168274 // Gsdmc2 // gasdermin C2 // 15 D1|15 // 331063 /// NM_177912 // Gsdmc2 //	Gsdmc2	NM_001168274	2.46306	2.46306	SGGFPa6-2010 up vs IFskina6-2010	2.1309	2.1309	SGGFPa6-2011 up vs IFskina6-2011
10371616	9412	NM_144807 // Chpt1 // choline phosphotransferase 1 // 10 C1|10 // 212862 /// NM_0011466	Chpt1	NM_144807	2.46283	2.46283	SGGFPa6-2010 up vs IFskina6-2010	2.86953	2.86953	SGGFPa6-2011 up vs IFskina6-2011
10435031	16210	NM_177633 // Ubxn7 // UBX domain protein 7 // 16 A1|16 // 224111 /// ENSMUST00000115151	Ubxn7	NM_177633	2.46126	2.46126	SGGFPa6-2010 up vs IFskina6-2010	2.37302	2.37302	SGGFPa6-2011 up vs IFskina6-2011
10399038	12207	NM_001004066 // Zfp386 // zinc finger protein 386 (Kruppel-like) // 12 F2|12 // 56220 /	Zfp386	NM_001004066	2.45429	2.45429	SGGFPa6-2010 up vs IFskina6-2010	2.22989	2.22989	SGGFPa6-2011 up vs IFskina6-2011
10583228	32449	BC043120 // Fam76b // family with sequence similarity 76, member B // 9 A1|9 // 72826 /	Fam76b	BC043120	2.45409	2.45409	SGGFPa6-2010 up vs IFskina6-2010	2.36008	2.36008	SGGFPa6-2011 up vs IFskina6-2011
10380591	10333	NM_033568 // Snf8 // SNF8, ESCRT-II complex subunit, homolog (S. cerevisiae) // 11 D|11	Snf8	NM_033568	2.45385	2.45385	SGGFPa6-2010 up vs IFskina6-2010	2.63996	2.63996	SGGFPa6-2011 up vs IFskina6-2011
10455015	18349	NR_027885 // Vaultrc5 // vault RNA component 5 // --- // 378472	Vaultrc5	NR_027885	2.45203	2.45203	SGGFPa6-2010 up vs IFskina6-2010	2.48177	2.48177	SGGFPa6-2011 up vs IFskina6-2011
10517443	25064	NM_013736 // Tceb3 // transcription elongation factor B (SIII), polypeptide 3 // 4|4 D3	Tceb3	NM_013736	2.44934	2.44934	SGGFPa6-2010 up vs IFskina6-2010	2.96958	2.96958	SGGFPa6-2011 up vs IFskina6-2011
10518346	25156	NM_001085522 // Gm13251 // predicted gene 13251 // 4 E1|4 // 433791 /// NM_027285 // 17	Gm13251	NM_001085522	2.44901	2.44901	SGGFPa6-2010 up vs IFskina6-2010	8.47541	8.47541	SGGFPa6-2011 up vs IFskina6-2011
10412385	13780	NM_021556 // Mrps30 // mitochondrial ribosomal protein S30 // 13 D2.3|13 // 59054 /// E	Mrps30	NM_021556	2.44445	2.44445	SGGFPa6-2010 up vs IFskina6-2010	2.23796	2.23796	SGGFPa6-2011 up vs IFskina6-2011
10400143	12339	NM_144552 // Stxbp6 // syntaxin binding protein 6 (amisyn) // 12 B3|12 // 217517 /// EN	Stxbp6	NM_144552	2.44372	2.44372	SGGFPa6-2010 up vs IFskina6-2010	2.01996	2.01996	SGGFPa6-2011 up vs IFskina6-2011
10395227	11784	NM_001163126 // Cog5 // component of oligomeric golgi complex 5 // 12 A2|12 // 238123 /	Cog5	NM_001163126	2.43975	2.43975	SGGFPa6-2010 up vs IFskina6-2010	4.02895	4.02895	SGGFPa6-2011 up vs IFskina6-2011
10453334	18183	NM_028233 // Lrpprc // leucine-rich PPR-motif containing // 17 E4|17 // 72416 /// ENSMU	Lrpprc	NM_028233	2.43909	2.43909	SGGFPa6-2010 up vs IFskina6-2010	3.54269	3.54269	SGGFPa6-2011 up vs IFskina6-2011
10544219	27801	NM_139294 // Braf // Braf transforming gene // 6 B1|6 15.5 cM // 109880 /// ENSMUST0000	Braf	NM_139294	2.43548	2.43548	SGGFPa6-2010 up vs IFskina6-2010	2.26556	2.26556	SGGFPa6-2011 up vs IFskina6-2011
10497421	22845	NM_080634 // Hps3 // Hermansky-Pudlak syndrome 3 homolog (human) // 3 A2|3 12.5 cM // 1	Hps3	NM_080634	2.43444	2.43444	SGGFPa6-2010 up vs IFskina6-2010	2.28141	2.28141	SGGFPa6-2011 up vs IFskina6-2011
10496110	22701	NM_011863 // Papss1 // 3'-phosphoadenosine 5'-phosphosulfate synthase 1 // 3 G3|3 64.5	Papss1	NM_011863	2.43051	2.43051	SGGFPa6-2010 up vs IFskina6-2010	2.79824	2.79824	SGGFPa6-2011 up vs IFskina6-2011
10387992	11079	NM_172394 // Nup88 // nucleoporin 88 // 11 B4|11 42.0 cM // 19069 /// NM_001083331 // N	Nup88	NM_172394	2.42875	2.42875	SGGFPa6-2010 up vs IFskina6-2010	2.97353	2.97353	SGGFPa6-2011 up vs IFskina6-2011
10451495	18015	NM_146078 // Ubr2 // ubiquitin protein ligase E3 component n-recognin 2 // 17 C|17 // 2	Ubr2	NM_146078	2.41814	2.41814	SGGFPa6-2010 up vs IFskina6-2010	2.1061	2.1061	SGGFPa6-2011 up vs IFskina6-2011
10402249	12556	NM_029705 // Atxn3 // ataxin 3 // 12 E|12 // 110616 /// NM_001167914 // Atxn3 // ataxin	Atxn3	NM_029705	2.41712	2.41712	SGGFPa6-2010 up vs IFskina6-2010	4.99834	4.99834	SGGFPa6-2011 up vs IFskina6-2011
10378216	10097	NM_016745 // Atp2a3 // ATPase, Ca++ transporting, ubiquitous // 11 B4|11 // 53313 /// N	Atp2a3	NM_016745	2.41201	2.41201	SGGFPa6-2010 up vs IFskina6-2010	2.85303	2.85303	SGGFPa6-2011 up vs IFskina6-2011
10513869	24650	NM_172694 // Megf9 // multiple EGF-like-domains 9 // 4 C2|4 // 230316 /// ENSMUST000001	Megf9	NM_172694	2.41057	2.41057	SGGFPa6-2010 up vs IFskina6-2010	2.16851	2.16851	SGGFPa6-2011 up vs IFskina6-2011
10425757	15261	BC092006 // 1500032L24Rik // RIKEN cDNA 1500032L24 gene // 15|15 E2 // 69029 /// ENSMUS	1500032L24Rik	BC092006	2.40644	2.40644	SGGFPa6-2010 up vs IFskina6-2010	5.46733	5.46733	SGGFPa6-2011 up vs IFskina6-2011
10473045	20231	NM_153405 // Rbm45 // RNA binding motif protein 45 // 2 C3|2 // 241490 /// AY152391 //	Rbm45	NM_153405	2.40593	2.40593	SGGFPa6-2010 up vs IFskina6-2010	2.17795	2.17795	SGGFPa6-2011 up vs IFskina6-2011
10457745	18632	NM_177038 // D030074E01Rik // RIKEN cDNA D030074E01 gene // 18 A2|18 // 75964 /// NM_02	D030074E01Rik	NM_177038	2.40222	2.40222	SGGFPa6-2010 up vs IFskina6-2010	2.61442	2.61442	SGGFPa6-2011 up vs IFskina6-2011
10544525	27839	NM_009787 // Pdia4 // protein disulfide isomerase associated 4 // 6 B2.3|6 18.0 cM // 1	Pdia4	NM_009787	2.40217	2.40217	SGGFPa6-2010 up vs IFskina6-2010	4.90394	4.90394	SGGFPa6-2011 up vs IFskina6-2011
10454398	18293	NM_001033532 // AW554918 // expressed sequence AW554918 // 18 A2|18 // 225289 /// ENSMU	AW554918	NM_001033532	2.39848	2.39848	SGGFPa6-2010 up vs IFskina6-2010	3.20281	3.20281	SGGFPa6-2011 up vs IFskina6-2011
10368030	9054	NM_001033432 // Heca // headcase homolog (Drosophila) // 10 A2-A3|10 // 380629 /// NM_0	Heca	NM_001033432	2.39531	2.39531	SGGFPa6-2010 up vs IFskina6-2010	2.415	2.415	SGGFPa6-2011 up vs IFskina6-2011
10469514	19885	NM_007552 // Bmi1 // Bmi1 polycomb ring finger oncogene // 2 A3|2 9.0 cM // 12151 /// E	Bmi1	NM_007552	2.39507	2.39507	SGGFPa6-2010 up vs IFskina6-2010	2.20434	2.20434	SGGFPa6-2011 up vs IFskina6-2011
10561085	29843	NM_144922 // Hnrnpul1 // heterogeneous nuclear ribonucleoprotein U-like 1 // 7 A3|7 //	Hnrnpul1	NM_144922	2.39388	2.39388	SGGFPa6-2010 up vs IFskina6-2010	2.77933	2.77933	SGGFPa6-2011 up vs IFskina6-2011
10454310	18288	NM_013814 // Galnt1 // UDP-N-acetyl-alpha-D-galactosamine:polypeptide N-acetylgalactosa	Galnt1	NM_013814	2.39235	2.39235	SGGFPa6-2010 up vs IFskina6-2010	4.88183	4.88183	SGGFPa6-2011 up vs IFskina6-2011
10380477	10317	NM_172261 // Ppp1r9b // protein phosphatase 1, regulatory subunit 9B // 11 D|11 // 2171	Ppp1r9b	NM_172261	2.39022	2.39022	SGGFPa6-2010 up vs IFskina6-2010	2.112	2.112	SGGFPa6-2011 up vs IFskina6-2011
10419691	14665	NM_019721 // Mettl3 // methyltransferase like 3 // 14 C2|14 // 56335 /// NM_023434 // T	Mettl3	NM_019721	2.38985	2.38985	SGGFPa6-2010 up vs IFskina6-2010	2.5731	2.5731	SGGFPa6-2011 up vs IFskina6-2011
10543004	27687	NM_183308 // Pon2 // paraoxonase 2 // 6 A1|6 1.5 cM // 330260 /// ENSMUST00000057792 //	Pon2	NM_183308	2.38723	2.38723	SGGFPa6-2010 up vs IFskina6-2010	2.73124	2.73124	SGGFPa6-2011 up vs IFskina6-2011
10428648	15586	NM_001081288 // Taf2 // TAF2 RNA polymerase II, TATA box binding protein (TBP)-associat	Taf2	NM_001081288	2.38471	2.38471	SGGFPa6-2010 up vs IFskina6-2010	2.32346	2.32346	SGGFPa6-2011 up vs IFskina6-2011
10395277	11791	NM_013635 // Sypl // synaptophysin-like protein // 12 B2|12 15.0 cM // 19027 /// NM_198	Sypl	NM_013635	2.38456	2.38456	SGGFPa6-2010 up vs IFskina6-2010	3.18608	3.18608	SGGFPa6-2011 up vs IFskina6-2011
10405605	12963	NM_001164041 // Smad5 // MAD homolog 5 (Drosophila) // 13 B1|13 35.0 cM // 17129 /// NM	Smad5	NM_001164041	2.38402	2.38402	SGGFPa6-2010 up vs IFskina6-2010	2.08107	2.08107	SGGFPa6-2011 up vs IFskina6-2011
10562349	29960	NM_026549 // Pdcd2l // programmed cell death 2-like // 7 B1|7 // 68079 /// ENSMUST00000	Pdcd2l	NM_026549	2.38108	2.38108	SGGFPa6-2010 up vs IFskina6-2010	2.34779	2.34779	SGGFPa6-2011 up vs IFskina6-2011
10530100	26304	NM_178407 // Arap2 // ArfGAP with RhoGAP domain, ankyrin repeat and PH domain 2 // 5 C3	Arap2	NM_178407	2.37976	2.37976	SGGFPa6-2010 up vs IFskina6-2010	2.66039	2.66039	SGGFPa6-2011 up vs IFskina6-2011
10599321	34215	NM_020256 // Zbtb33 // zinc finger and BTB domain containing 33 // X A3.3|X // 56805 //	Zbtb33	NM_020256	2.37976	2.37976	SGGFPa6-2010 up vs IFskina6-2010	2.69529	2.69529	SGGFPa6-2011 up vs IFskina6-2011
10576883	31755	NM_011369 // Shcbp1 // Shc SH2-domain binding protein 1 // 8|8 A1.2 // 20419 /// ENSMUS	Shcbp1	NM_011369	2.37968	2.37968	SGGFPa6-2010 up vs IFskina6-2010	4.49005	4.49005	SGGFPa6-2011 up vs IFskina6-2011
10355554	7723	NM_001190444 // Aamp // angio-associated migratory protein // 1 C3|1 41.0 cM // 227290	Aamp	NM_001190444	2.37683	2.37683	SGGFPa6-2010 up vs IFskina6-2010	3.54455	3.54455	SGGFPa6-2011 up vs IFskina6-2011
10607933	35334	NM_008222 // Hccs // holocytochrome c synthetase // X F5|X // 15159 /// ENSMUST00000112	Hccs	NM_008222	2.37385	2.37385	SGGFPa6-2010 up vs IFskina6-2010	2.04486	2.04486	SGGFPa6-2011 up vs IFskina6-2011
10408331	13332	NM_025790 // Acot13 // acyl-CoA thioesterase 13 // 13|13 A3.2 // 66834 /// ENSMUST00000	Acot13	NM_025790	2.37279	2.37279	SGGFPa6-2010 up vs IFskina6-2010	2.14025	2.14025	SGGFPa6-2011 up vs IFskina6-2011
10388613	11148	NM_001012309 // Ccdc55 // coiled-coil domain containing 55 // 11 B5|11 // 237859 /// EN	Ccdc55	NM_001012309	2.36982	2.36982	SGGFPa6-2010 up vs IFskina6-2010	4.55335	4.55335	SGGFPa6-2011 up vs IFskina6-2011
10416666	14324	NM_026474 // Sugt1 // SGT1, suppressor of G2 allele of SKP1 (S. cerevisiae) // 14 D3|14	Sugt1	NM_026474	2.36539	2.36539	SGGFPa6-2010 up vs IFskina6-2010	2.20414	2.20414	SGGFPa6-2011 up vs IFskina6-2011
10437992	16520	NM_152816 // Dnm1l // dynamin 1-like // 16 A2|16 // 74006 /// NM_001025947 // Dnm1l //	Dnm1l	NM_152816	2.36251	2.36251	SGGFPa6-2010 up vs IFskina6-2010	4.41524	4.41524	SGGFPa6-2011 up vs IFskina6-2011
10454483	18301	NM_028866 // Wdr33 // WD repeat domain 33 // 18|18 B3 // 74320 /// NM_001170970 // Wdr3	Wdr33	NM_028866	2.36137	2.36137	SGGFPa6-2010 up vs IFskina6-2010	2.13323	2.13323	SGGFPa6-2011 up vs IFskina6-2011
10447383	17545	NM_008532 // Epcam // epithelial cell adhesion molecule // 17 E4|17 // 17075 /// ENSMUS	Epcam	NM_008532	2.36006	2.36006	SGGFPa6-2010 up vs IFskina6-2010	4.59619	4.59619	SGGFPa6-2011 up vs IFskina6-2011
10368762	9152	NM_027879 // Cdc40 // cell division cycle 40 homolog (yeast) // 10 B1|10 // 71713 /// E	Cdc40	NM_027879	2.35995	2.35995	SGGFPa6-2010 up vs IFskina6-2010	2.5434	2.5434	SGGFPa6-2011 up vs IFskina6-2011
10438959	16624	NM_178069 // Lsg1 // large subunit GTPase 1 homolog (S. cerevisiae) // 16 B2|16 21.2 cM	Lsg1	NM_178069	2.35895	2.35895	SGGFPa6-2010 up vs IFskina6-2010	2.05361	2.05361	SGGFPa6-2011 up vs IFskina6-2011
10355931	7749	NM_011811 // Farsb // phenylalanyl-tRNA synthetase, beta subunit // 1 C4|1 // 23874 ///	Farsb	NM_011811	2.35893	2.35893	SGGFPa6-2010 up vs IFskina6-2010	2.64015	2.64015	SGGFPa6-2011 up vs IFskina6-2011
10408455	13350	NM_144536 // Cdkal1 // CDK5 regulatory subunit associated protein 1-like 1 // 13|13 A3.	Cdkal1	NM_144536	2.3589	2.3589	SGGFPa6-2010 up vs IFskina6-2010	2.21111	2.21111	SGGFPa6-2011 up vs IFskina6-2011
10384138	10690	NM_134020 // Tmed4 // transmembrane emp24 protein transport domain containing 4 // 11 A	Tmed4	NM_134020	2.35726	2.35726	SGGFPa6-2010 up vs IFskina6-2010	2.15529	2.15529	SGGFPa6-2011 up vs IFskina6-2011
10512308	24489	NM_011014 // Sigmar1 // sigma non-opioid intracellular receptor 1 // 4|4 A5-B2 // 18391	Sigmar1	NM_011014	2.34704	2.34704	SGGFPa6-2010 up vs IFskina6-2010	3.21216	3.21216	SGGFPa6-2011 up vs IFskina6-2011
10604687	34913	NM_146234 // Mmgt1 // membrane magnesium transporter 1 // X A5|X // 236792 /// ENSMUST0	Mmgt1	NM_146234	2.34552	2.34552	SGGFPa6-2010 up vs IFskina6-2010	3.64553	3.64553	SGGFPa6-2011 up vs IFskina6-2011
10529979	26292	NR_027710 // Ppargc1a // peroxisome proliferative activated receptor, gamma, coactivato	Ppargc1a	NR_027710	2.34533	2.34533	SGGFPa6-2010 up vs IFskina6-2010	3.56032	3.56032	SGGFPa6-2011 up vs IFskina6-2011
10594501	33648	NM_021345 // Ptplad1 // protein tyrosine phosphatase-like A domain containing 1 // 9|9	Ptplad1	NM_021345	2.34436	2.34436	SGGFPa6-2010 up vs IFskina6-2010	4.6111	4.6111	SGGFPa6-2011 up vs IFskina6-2011
10379075	10183	NM_001002004 // 2610507B11Rik // RIKEN cDNA 2610507B11 gene // 11 B5|11 44.93 cM // 725	2610507B11Rik	NM_001002004	2.34161	2.34161	SGGFPa6-2010 up vs IFskina6-2010	4.17403	4.17403	SGGFPa6-2011 up vs IFskina6-2011
10457409	18602	NM_021522 // Usp14 // ubiquitin specific peptidase 14 // 18 A1|18 2.0 cM // 59025 /// N	Usp14	NM_021522	2.34055	2.34055	SGGFPa6-2010 up vs IFskina6-2010	2.04626	2.04626	SGGFPa6-2011 up vs IFskina6-2011
10514133	24673	NM_027238 // Ttc39b // tetratricopeptide repeat domain 39B // 4 C3|4 // 69863 /// ENSMU	Ttc39b	NM_027238	2.33858	2.33858	SGGFPa6-2010 up vs IFskina6-2010	2.28972	2.28972	SGGFPa6-2011 up vs IFskina6-2011
10375216	9780	NM_145962 // Pank3 // pantothenate kinase 3 // 11 A4|11 // 211347 /// ENSMUST0000001899	Pank3	NM_145962	2.33808	2.33808	SGGFPa6-2010 up vs IFskina6-2010	4.86489	4.86489	SGGFPa6-2011 up vs IFskina6-2011
10483249	21296	NM_015736 // Galnt3 // UDP-N-acetyl-alpha-D-galactosamine:polypeptide N-acetylgalactosa	Galnt3	NM_015736	2.33797	2.33797	SGGFPa6-2010 up vs IFskina6-2010	4.60273	4.60273	SGGFPa6-2011 up vs IFskina6-2011
10441339	16917	NR_015491 // A630089N07Rik // RIKEN cDNA A630089N07 gene // 16 C4|16 // 320586 /// ENSM	A630089N07Rik	NR_015491	2.33756	2.33756	SGGFPa6-2010 up vs IFskina6-2010	6.29958	6.29958	SGGFPa6-2011 up vs IFskina6-2011
10379410	10208	NM_001163354 // Rhot1 // ras homolog gene family, member T1 // 11 B5|11 47.26 cM // 590	Rhot1	NM_001163354	2.33732	2.33732	SGGFPa6-2010 up vs IFskina6-2010	6.38623	6.38623	SGGFPa6-2011 up vs IFskina6-2011
10441864	16968	NM_010806 // Mllt4 // myeloid/lymphoid or mixed-lineage leukemia (trithorax homolog, Dr	Mllt4	NM_010806	2.33651	2.33651	SGGFPa6-2010 up vs IFskina6-2010	2.04635	2.04635	SGGFPa6-2011 up vs IFskina6-2011
10512291	24487	NM_016890 // Dctn3 // dynactin 3 // 4|4 B1 // 53598 /// NM_001159565 // Dctn3 // dynact	Dctn3	NM_016890	2.33564	2.33564	SGGFPa6-2010 up vs IFskina6-2010	2.92656	2.92656	SGGFPa6-2011 up vs IFskina6-2011
10604528	34876	NM_134163 // Mbnl3 // muscleblind-like 3 (Drosophila) // X A5|X // 171170 /// ENSMUST00	Mbnl3	NM_134163	2.33399	2.33399	SGGFPa6-2010 up vs IFskina6-2010	4.92181	4.92181	SGGFPa6-2011 up vs IFskina6-2011
10496475	22736	NM_007410 // Adh5 // alcohol dehydrogenase 5 (class III), chi polypeptide // 3 G3|3 //	Adh5	NM_007410	2.33335	2.33335	SGGFPa6-2010 up vs IFskina6-2010	2.86887	2.86887	SGGFPa6-2011 up vs IFskina6-2011
10557862	29448	NM_001082960 // Itgam // integrin alpha M // 7|7 F4 // 16409 /// NM_008401 // Itgam //	Itgam	NM_001082960	2.33233	2.33233	SGGFPa6-2010 up vs IFskina6-2010	2.14458	2.14458	SGGFPa6-2011 up vs IFskina6-2011
10544976	27900	NM_145958 // Kbtbd2 // kelch repeat and BTB (POZ) domain containing 2 // 6 B3|6 // 2109	Kbtbd2	NM_145958	2.33224	2.33224	SGGFPa6-2010 up vs IFskina6-2010	2.516	2.516	SGGFPa6-2011 up vs IFskina6-2011
10433034	16001	NM_146065 // Atf7 // activating transcription factor 7 // 15 F3|15 // 223922 /// ENSMUS	Atf7	NM_146065	2.33134	2.33134	SGGFPa6-2010 up vs IFskina6-2010	2.0092	2.0092	SGGFPa6-2011 up vs IFskina6-2011
10358999	8093	NM_011273 // Xpr1 // xenotropic and polytropic retrovirus receptor 1 // 1 G3|1 81.6 cM	Xpr1	NM_011273	2.33019	2.33019	SGGFPa6-2010 up vs IFskina6-2010	2.55829	2.55829	SGGFPa6-2011 up vs IFskina6-2011
10580537	32155	NM_010241 // Aktip // thymoma viral proto-oncogene 1 interacting protein // 8 D|8 41.0	Aktip	NM_010241	2.32989	2.32989	SGGFPa6-2010 up vs IFskina6-2010	2.26966	2.26966	SGGFPa6-2011 up vs IFskina6-2011
10561907	29910	NM_001033140 // Sdhaf1 // succinate dehydrogenase complex assembly factor 1 // 7 B1|7 /	Sdhaf1	NM_001033140	2.3295	2.3295	SGGFPa6-2010 up vs IFskina6-2010	3.20495	3.20495	SGGFPa6-2011 up vs IFskina6-2011
10496946	22778	NM_198416 // Zzz3 // zinc finger, ZZ domain containing 3 // 3 H3|3 // 108946 /// NM_001	Zzz3	NM_198416	2.32909	2.32909	SGGFPa6-2010 up vs IFskina6-2010	2.10878	2.10878	SGGFPa6-2011 up vs IFskina6-2011
10362171	8420	NM_016797 // Stx7 // syntaxin 7 // 10|10 A3 // 53331 /// ENSMUST00000020174 // Stx7 //	Stx7	NM_016797	2.32865	2.32865	SGGFPa6-2010 up vs IFskina6-2010	2.48094	2.48094	SGGFPa6-2011 up vs IFskina6-2011
10495343	22631	NM_181400 // Wdr47 // WD repeat domain 47 // 3 F3|3 // 99512 /// ENSMUST00000051145 //	Wdr47	NM_181400	2.32541	2.32541	SGGFPa6-2010 up vs IFskina6-2010	2.22234	2.22234	SGGFPa6-2011 up vs IFskina6-2011
10574226	31503	NM_011332 // Ccl17 // chemokine (C-C motif) ligand 17 // 8 C5|8 45.0 cM // 20295 /// EN	Ccl17	NM_011332	2.32506	2.32506	SGGFPa6-2010 up vs IFskina6-2010	2.66305	2.66305	SGGFPa6-2011 up vs IFskina6-2011
10407012	13146	NM_026075 // Srek1ip1 // splicing regulatory glutamine/lysine-rich protein 1interacting	Srek1ip1	NM_026075	2.32215	2.32215	SGGFPa6-2010 up vs IFskina6-2010	2.74256	2.74256	SGGFPa6-2011 up vs IFskina6-2011
10429510	15680	NM_001081961 // 2300005B03Rik // RIKEN cDNA 2300005B03 gene // 15 D3|15 // 69462 /// EN	2300005B03Rik	NM_001081961	2.32105	2.32105	SGGFPa6-2010 up vs IFskina6-2010	4.52319	4.52319	SGGFPa6-2011 up vs IFskina6-2011				Receptor
10578810	31967	NM_173874 // Clcn3 // chloride channel 3 // 8 B3.1|8 32.2 cM // 12725 /// NM_173873 //	Clcn3	NM_173874	2.31963	2.31963	SGGFPa6-2010 up vs IFskina6-2010	2.90874	2.90874	SGGFPa6-2011 up vs IFskina6-2011				Receptor
10487480	21771	NM_001113179 // Bub1 // budding uninhibited by benzimidazoles 1 homolog (S. cerevisiae)	Bub1	NM_001113179	2.3183	2.3183	SGGFPa6-2010 up vs IFskina6-2010	4.45274	4.45274	SGGFPa6-2011 up vs IFskina6-2011
10517328	25051	NM_027935 // Tmem50a // transmembrane protein 50A // 4 D3|4 65.71 cM // 71817 /// ENSMU	Tmem50a	NM_027935	2.31681	2.31681	SGGFPa6-2010 up vs IFskina6-2010	3.7945	3.7945	SGGFPa6-2011 up vs IFskina6-2011
10518335	25153	NM_027285 // 1700029I01Rik // RIKEN cDNA 1700029I01 gene // 4 E1|4 // 70005 /// NM_0010	1700029I01Rik	NM_027285	2.31556	2.31556	SGGFPa6-2010 up vs IFskina6-2010	6.10856	6.10856	SGGFPa6-2011 up vs IFskina6-2011
10428211	15533	NM_026521 // Zfp706 // zinc finger protein 706 // 15 B3.1|15 // 68036 /// ENSMUST000000	Zfp706	NM_026521	2.31521	2.31521	SGGFPa6-2010 up vs IFskina6-2010	3.41663	3.41663	SGGFPa6-2011 up vs IFskina6-2011
10367041	8942	NM_153133 // Rdh9 // retinol dehydrogenase 9 // 10 D3|10 // 103142 /// ENSMUST000000526	Rdh9	NM_153133	2.31071	2.31071	SGGFPa6-2010 up vs IFskina6-2010	2.42235	2.42235	SGGFPa6-2011 up vs IFskina6-2011				Cell Junction/Ion Transport/Signal
10405994	13030	NM_138596 // Med10 // mediator of RNA polymerase II transcription, subunit 10 homolog (	Med10	NM_138596	2.30915	2.30915	SGGFPa6-2010 up vs IFskina6-2010	3.55187	3.55187	SGGFPa6-2011 up vs IFskina6-2011
10401028	12436	NM_030750 // Sgpp1 // sphingosine-1-phosphate phosphatase 1 // 12 C3|12 // 81535 /// EN	Sgpp1	NM_030750	2.30807	2.30807	SGGFPa6-2010 up vs IFskina6-2010	2.80806	2.80806	SGGFPa6-2011 up vs IFskina6-2011
10432636	15963	NM_174992 // Smagp // small cell adhesion glycoprotein // 15 F1|15 // 207818 /// NM_001	Smagp	NM_174992	2.30748	2.30748	SGGFPa6-2010 up vs IFskina6-2010	4.15248	4.15248	SGGFPa6-2011 up vs IFskina6-2011
10490232	22063	NR_036450 // Gm14403 // predicted gene 14403 // 2 H4|2 // 433520 /// BC059210 // 221041	Gm14403	NR_036450	2.3074	2.3074	SGGFPa6-2010 up vs IFskina6-2010	6.47916	6.47916	SGGFPa6-2011 up vs IFskina6-2011
10423663	15043	NM_177151 // Vps13b // vacuolar protein sorting 13B (yeast) // 15 B3.1|15 // 666173 ///	Vps13b	NM_177151	2.30633	2.30633	SGGFPa6-2010 up vs IFskina6-2010	2.31793	2.31793	SGGFPa6-2011 up vs IFskina6-2011
10369867	9258	NM_009360 // Tfam // transcription factor A, mitochondrial // 10 B5|10 38.0 cM // 21780	Tfam	NM_009360	2.30505	2.30505	SGGFPa6-2010 up vs IFskina6-2010	3.45493	3.45493	SGGFPa6-2011 up vs IFskina6-2011
10384737	10760	NM_172555 // Papolg // poly(A) polymerase gamma // 11 A3.2|11 // 216578 /// ENSMUST0000	Papolg	NM_172555	2.30343	2.30343	SGGFPa6-2010 up vs IFskina6-2010	2.31368	2.31368	SGGFPa6-2011 up vs IFskina6-2011
10539026	27253	NM_029673 // Immt // inner membrane protein, mitochondrial // 6|6 C3 // 76614 /// ENSMU	Immt	NM_029673	2.30129	2.30129	SGGFPa6-2010 up vs IFskina6-2010	5.51233	5.51233	SGGFPa6-2011 up vs IFskina6-2011
10420457	14750	NM_028643 // Efha1 // EF hand domain family A1 // 14 C2|14 // 68514 /// ENSMUST00000022	Efha1	NM_028643	2.301	2.301	SGGFPa6-2010 up vs IFskina6-2010	4.54906	4.54906	SGGFPa6-2011 up vs IFskina6-2011
10422194	14920	NM_134077 // Rbm26 // RNA binding motif protein 26 // 14 E2.3|14 // 74213 /// ENSMUST00	Rbm26	NM_134077	2.3003	2.3003	SGGFPa6-2010 up vs IFskina6-2010	3.42924	3.42924	SGGFPa6-2011 up vs IFskina6-2011
10497971	22909	NM_001081411 // Sclt1 // sodium channel and clathrin linker 1 // 3|3 C // 67161 /// ENS	Sclt1	NM_001081411	2.29797	2.29797	SGGFPa6-2010 up vs IFskina6-2010	2.68333	2.68333	SGGFPa6-2011 up vs IFskina6-2011
10400460	12370	NM_145442 // Mbip // MAP3K12 binding inhibitory protein 1 // 12 C1|12 // 217588 /// ENS	Mbip	NM_145442	2.29796	2.29796	SGGFPa6-2010 up vs IFskina6-2010	2.19925	2.19925	SGGFPa6-2011 up vs IFskina6-2011
10514255	24689	NM_027326 // Mllt3 // myeloid/lymphoid or mixed-lineage leukemia (trithorax homolog, Dr	Mllt3	NM_027326	2.29671	2.29671	SGGFPa6-2010 up vs IFskina6-2010	3.72109	3.72109	SGGFPa6-2011 up vs IFskina6-2011				ECM
10374880	9745	NM_133767 // Mtif2 // mitochondrial translational initiation factor 2 // 11|11 A4 // 76	Mtif2	NM_133767	2.29642	2.29642	SGGFPa6-2010 up vs IFskina6-2010	2.17655	2.17655	SGGFPa6-2011 up vs IFskina6-2011
10492890	22363	NM_030695 // Lrba // LPS-responsive beige-like anchor // 3 F1|3 // 80877 /// NM_0010776	Lrba	NM_030695	2.29314	2.29314	SGGFPa6-2010 up vs IFskina6-2010	2.80174	2.80174	SGGFPa6-2011 up vs IFskina6-2011
10565330	30408	NM_022985 // Zfand6 // zinc finger, AN1-type domain 6 // 7 D3|7 // 65098 /// ENSMUST000	Zfand6	NM_022985	2.29199	2.29199	SGGFPa6-2010 up vs IFskina6-2010	3.59654	3.59654	SGGFPa6-2011 up vs IFskina6-2011
10547251	28191	NM_194339 // Bms1 // BMS1 homolog, ribosome assembly protein (yeast) // 6 F1|6 // 21389	Bms1	NM_194339	2.28995	2.28995	SGGFPa6-2010 up vs IFskina6-2010	3.49338	3.49338	SGGFPa6-2011 up vs IFskina6-2011
10467979	19716	NM_009127 // Scd1 // stearoyl-Coenzyme A desaturase 1 // 19 C3|19 43.0 cM // 20249 ///	Scd1	NM_009127	2.28551	2.28551	SGGFPa6-2010 up vs IFskina6-2010	2.10078	2.10078	SGGFPa6-2011 up vs IFskina6-2011
10503711	23577	NM_011997 // Casp8ap2 // caspase 8 associated protein 2 // 4 A5|4 11.4 cM // 26885 ///	Casp8ap2	NM_011997	2.28513	2.28513	SGGFPa6-2010 up vs IFskina6-2010	3.49424	3.49424	SGGFPa6-2011 up vs IFskina6-2011
10354868	7654	NM_172513 // Fam126b // family with sequence similarity 126, member B // 1 C1.3|1 30.1	Fam126b	NM_172513	2.28364	2.28364	SGGFPa6-2010 up vs IFskina6-2010	2.58503	2.58503	SGGFPa6-2011 up vs IFskina6-2011
10520362	25359	NM_153526 // Insig1 // insulin induced gene 1 // 5 B1|5 // 231070 /// ENSMUST0000005915	Insig1	NM_153526	2.27871	2.27871	SGGFPa6-2010 up vs IFskina6-2010	3.28509	3.28509	SGGFPa6-2011 up vs IFskina6-2011
10468816	19790	NM_030197 // 2700078E11Rik // RIKEN cDNA 2700078E11 gene // 19 D3|19 // 78832 /// NM_00	2700078E11Rik	NM_030197	2.27845	2.27845	SGGFPa6-2010 up vs IFskina6-2010	2.85297	2.85297	SGGFPa6-2011 up vs IFskina6-2011
10392834	11550	NM_001101657 // Gm11711 // predicted gene 11711 // 11 E2|11 // 100043125 /// NM_199201	Gm11711	NM_001101657	2.27723	2.27723	SGGFPa6-2010 up vs IFskina6-2010	2.09611	2.09611	SGGFPa6-2011 up vs IFskina6-2011
10367728	9028	NM_138667 // Tab2 // TGF-beta activated kinase 1/MAP3K7 binding protein 2 // 10 A1|10 /	Tab2	NM_138667	2.27496	2.27496	SGGFPa6-2010 up vs IFskina6-2010	2.44481	2.44481	SGGFPa6-2011 up vs IFskina6-2011
10565567	30449	NR_015510 // 4632427E13Rik // RIKEN cDNA 4632427E13 gene // 7 E1|7 // 666737	4632427E13Rik	NR_015510	2.26702	2.26702	SGGFPa6-2010 up vs IFskina6-2010	2.69294	2.69294	SGGFPa6-2011 up vs IFskina6-2011
10463254	19255	NM_177464 // D19Ertd386e // DNA segment, Chr 19, ERATO Doi 386, expressed // 19 C3|19 4	D19Ertd386e	NM_177464	2.26673	2.26673	SGGFPa6-2010 up vs IFskina6-2010	2.06213	2.06213	SGGFPa6-2011 up vs IFskina6-2011
10540676	27420	NM_026365 // Jagn1 // jagunal homolog 1 (Drosophila) // 6 E3|6 // 67767 /// ENSMUST0000	Jagn1	NM_026365	2.2659	2.2659	SGGFPa6-2010 up vs IFskina6-2010	3.27858	3.27858	SGGFPa6-2011 up vs IFskina6-2011
10524124	25739	NM_008146 // Golga3 // golgi autoantigen, golgin subfamily a, 3 // 5 F|5 62.0 cM // 269	Golga3	NM_008146	2.26371	2.26371	SGGFPa6-2010 up vs IFskina6-2010	2.03912	2.03912	SGGFPa6-2011 up vs IFskina6-2011
10568714	30902	NM_001081117 // Mki67 // antigen identified by monoclonal antibody Ki 67 // 7|7 F3-F5 /	Mki67	NM_001081117	2.26046	2.26046	SGGFPa6-2010 up vs IFskina6-2010	3.36092	3.36092	SGGFPa6-2011 up vs IFskina6-2011
10411739	13724	NM_172301 // Ccnb1 // cyclin B1 // 13 D1|13 56.0 cM // 268697 /// ENSMUST00000072119 //	Ccnb1	NM_172301	2.25973	2.25973	SGGFPa6-2010 up vs IFskina6-2010	2.95658	2.95658	SGGFPa6-2011 up vs IFskina6-2011
10494227	22513	NM_029789 // Lass2 // LAG1 homolog, ceramide synthase 2 // 3|3 F2 // 76893 /// ENSMUST0	Lass2	NM_029789	2.25546	2.25546	SGGFPa6-2010 up vs IFskina6-2010	2.67395	2.67395	SGGFPa6-2011 up vs IFskina6-2011
10389795	11270	NM_011505 // Stxbp4 // syntaxin binding protein 4 // 11|11 C // 20913 /// ENSMUST000001	Stxbp4	NM_011505	2.25434	2.25434	SGGFPa6-2010 up vs IFskina6-2010	2.12419	2.12419	SGGFPa6-2011 up vs IFskina6-2011
10516027	24921	NM_001081013 // Rlf // rearranged L-myc fusion sequence // 4 D2.2|4 // 109263 /// ENSMU	Rlf	NM_001081013	2.25058	2.25058	SGGFPa6-2010 up vs IFskina6-2010	2.72832	2.72832	SGGFPa6-2011 up vs IFskina6-2011
10436734	16383	NM_007520 // Bach1 // BTB and CNC homology 1 // 16 C3.3|16 // 12013 /// ENSMUST00000026	Bach1	NM_007520	2.24959	2.24959	SGGFPa6-2010 up vs IFskina6-2010	2.82912	2.82912	SGGFPa6-2011 up vs IFskina6-2011				Cytoskeleton/Protein Transport
10475708	20571	NM_026678 // Blvra // biliverdin reductase A // 2 F3|2 62.0 cM // 109778 /// ENSMUST000	Blvra	NM_026678	2.24938	2.24938	SGGFPa6-2010 up vs IFskina6-2010	2.89424	2.89424	SGGFPa6-2011 up vs IFskina6-2011
10541605	27512	NM_020001 // Clec4n // C-type lectin domain family 4, member n // 6 F3|6 55.0 cM // 566	Clec4n	NM_020001	2.24751	2.24751	SGGFPa6-2010 up vs IFskina6-2010	2.28107	2.28107	SGGFPa6-2011 up vs IFskina6-2011
10478447	20855	NM_021420 // Stk4 // serine/threonine kinase 4 // 2 H3|2 // 58231 /// ENSMUST0000001835	Stk4	NM_021420	2.24481	2.24481	SGGFPa6-2010 up vs IFskina6-2010	2.08417	2.08417	SGGFPa6-2011 up vs IFskina6-2011
10460151	18899	NM_172252 // Mrpl21 // mitochondrial ribosomal protein L21 // 19 A|19 // 353242 /// ENS	Mrpl21	NM_172252	2.24369	2.24369	SGGFPa6-2010 up vs IFskina6-2010	2.70681	2.70681	SGGFPa6-2011 up vs IFskina6-2011
10578582	31941	NM_177240 // D030016E14Rik // RIKEN cDNA D030016E14 gene // 8 B1.1|8 // 320714 /// ENSM	D030016E14Rik	NM_177240	2.24206	2.24206	SGGFPa6-2010 up vs IFskina6-2010	3.01412	3.01412	SGGFPa6-2011 up vs IFskina6-2011
10488830	21913	NM_001004721 // Pigu // phosphatidylinositol glycan anchor biosynthesis, class U // 2 H	Pigu	NM_001004721	2.24047	2.24047	SGGFPa6-2010 up vs IFskina6-2010	2.70811	2.70811	SGGFPa6-2011 up vs IFskina6-2011
10454306	18287	NM_011755 // Zfp35 // zinc finger protein 35 // 18 A2|18 // 22694 /// ENSMUST0000007494	Zfp35	NM_011755	2.24032	2.24032	SGGFPa6-2010 up vs IFskina6-2010	3.47458	3.47458	SGGFPa6-2011 up vs IFskina6-2011
10443027	17114	NM_029870 // A930001N09Rik // RIKEN cDNA A930001N09 gene // 17|17 B1 // 77128 /// ENSMU	A930001N09Rik	NM_029870	2.24005	2.24005	SGGFPa6-2010 up vs IFskina6-2010	2.1952	2.1952	SGGFPa6-2011 up vs IFskina6-2011
10362676	8488	NM_001168304 // Cdk19 // cyclin-dependent kinase 19 // 10 B1|10 // 78334 /// NM_198164	Cdk19	NM_001168304	2.24005	2.24005	SGGFPa6-2010 up vs IFskina6-2010	3.6298	3.6298	SGGFPa6-2011 up vs IFskina6-2011
10426875	15371	NM_007497 // Atf1 // activating transcription factor 1 // 15 F3|15 // 11908 /// M63725	Atf1	NM_007497	2.23967	2.23967	SGGFPa6-2010 up vs IFskina6-2010	2.25576	2.25576	SGGFPa6-2011 up vs IFskina6-2011
10406193	13048	NM_001168659 // Ccdc127 // coiled-coil domain containing 127 // 13 C1|13 // 67433 /// N	Ccdc127	NM_001168659	2.23506	2.23506	SGGFPa6-2010 up vs IFskina6-2010	2.7405	2.7405	SGGFPa6-2011 up vs IFskina6-2011
10351269	7277	NM_029115 // 4930455F23Rik // RIKEN cDNA 4930455F23 gene // 1|1 H1 // 74895 /// ENSMUST	4930455F23Rik	NM_029115	2.2341	2.2341	SGGFPa6-2010 up vs IFskina6-2010	2.25241	2.25241	SGGFPa6-2011 up vs IFskina6-2011
10362186	8421	NM_021509 // Moxd1 // monooxygenase, DBH-like 1 // 10|10 A3 // 59012 /// ENSMUST0000009	Moxd1	NM_021509	2.23353	2.23353	SGGFPa6-2010 up vs IFskina6-2010	2.6922	2.6922	SGGFPa6-2011 up vs IFskina6-2011
10465604	19463	NM_016737 // Stip1 // stress-induced phosphoprotein 1 // 19 A|19 // 20867 /// ENSMUST00	Stip1	NM_016737	2.23303	2.23303	SGGFPa6-2010 up vs IFskina6-2010	3.58408	3.58408	SGGFPa6-2011 up vs IFskina6-2011				Signal/Cell Adhesion
10472820	20205	NM_008397 // Itga6 // integrin alpha 6 // 2 C2-C3|2 38.0 cM // 16403 /// ENSMUST0000002	Itga6	NM_008397	2.23177	2.23177	SGGFPa6-2010 up vs IFskina6-2010	3.23194	3.23194	SGGFPa6-2011 up vs IFskina6-2011
10440770	16873	NM_178923 // Srsf15 // serine/arginine-rich splicing factor 15 // 16 C3.3|16 // 224432	Srsf15	NM_178923	2.23051	2.23051	SGGFPa6-2010 up vs IFskina6-2010	2.65456	2.65456	SGGFPa6-2011 up vs IFskina6-2011				Signal/Cell Adhesion
10605919	35076	NM_001083110 // Pja1 // praja1, RING-H2 motif containing // X C3|X 36.6 cM // 18744 ///	Pja1	NM_001083110	2.22986	2.22986	SGGFPa6-2010 up vs IFskina6-2010	2.71424	2.71424	SGGFPa6-2011 up vs IFskina6-2011
10514072	24669	NM_026647 // Zdhhc21 // zinc finger, DHHC domain containing 21 // 4 C3|4 // 68268 /// E	Zdhhc21	NM_026647	2.22779	2.22779	SGGFPa6-2010 up vs IFskina6-2010	2.86531	2.86531	SGGFPa6-2011 up vs IFskina6-2011
10458823	18752	NM_025698 // Tmed7 // transmembrane emp24 protein transport domain containing 7 // 18 C	Tmed7	NM_025698	2.22692	2.22692	SGGFPa6-2010 up vs IFskina6-2010	2.77218	2.77218	SGGFPa6-2011 up vs IFskina6-2011
10542885	27672	NM_026054 // 2810474O19Rik // RIKEN cDNA 2810474O19 gene // 6 G3|6 // 67246 /// ENSMUST	2810474O19Rik	NM_026054	2.22363	2.22363	SGGFPa6-2010 up vs IFskina6-2010	2.30513	2.30513	SGGFPa6-2011 up vs IFskina6-2011
10366043	8839	NM_026268 // Dusp6 // dual specificity phosphatase 6 // 10|10 C3 // 67603 /// ENSMUST00	Dusp6	NM_026268	2.22111	2.22111	SGGFPa6-2010 up vs IFskina6-2010	2.50953	2.50953	SGGFPa6-2011 up vs IFskina6-2011
10420823	14791	NM_177338 // Hmbox1 // homeobox containing 1 // 14 D1|14 // 219150 /// ENSMUST000000678	Hmbox1	NM_177338	2.22039	2.22039	SGGFPa6-2010 up vs IFskina6-2010	2.28786	2.28786	SGGFPa6-2011 up vs IFskina6-2011
10410625	13622	NM_023281 // Sdha // succinate dehydrogenase complex, subunit A, flavoprotein (Fp) // 1	Sdha	NM_023281	2.21949	2.21949	SGGFPa6-2010 up vs IFskina6-2010	2.26111	2.26111	SGGFPa6-2011 up vs IFskina6-2011
10491363	22191	NM_024200 // Mfn1 // mitofusin 1 // 3 B|3 13.0 cM // 67414 /// ENSMUST00000091257 // Mf	Mfn1	NM_024200	2.2192	2.2192	SGGFPa6-2010 up vs IFskina6-2010	2.82926	2.82926	SGGFPa6-2011 up vs IFskina6-2011
10362803	8499	NM_016898 // Cd164 // CD164 antigen // 10 B2|10 25.0 cM // 53599 /// ENSMUST00000019962	Cd164	NM_016898	2.2141	2.2141	SGGFPa6-2010 up vs IFskina6-2010	2.2955	2.2955	SGGFPa6-2011 up vs IFskina6-2011
10533633	26679	NM_023232 // Diablo // diablo homolog (Drosophila) // 5 F|5 // 66593 /// NM_198611 // B	Diablo	NM_023232	2.21251	2.21251	SGGFPa6-2010 up vs IFskina6-2010	2.61651	2.61651	SGGFPa6-2011 up vs IFskina6-2011
10545940	28057	NM_011818 // Gmcl1 // germ cell-less homolog 1 (Drosophila) // 6 D1|6 47.3 cM // 23885	Gmcl1	NM_011818	2.21248	2.21248	SGGFPa6-2010 up vs IFskina6-2010	4.15786	4.15786	SGGFPa6-2011 up vs IFskina6-2011				Apoptosis/Signal
10428755	15599	NM_001042438 // Zhx1 // zinc fingers and homeoboxes 1 // 15 D2|15 // 22770 /// NM_00957	Zhx1	NM_001042438	2.2117	2.2117	SGGFPa6-2010 up vs IFskina6-2010	3.37369	3.37369	SGGFPa6-2011 up vs IFskina6-2011
10446376	17458	NM_008549 // Man2a1 // mannosidase 2, alpha 1 // 17|17 E1.2 // 17158 /// ENSMUST0000008	Man2a1	NM_008549	2.21155	2.21155	SGGFPa6-2010 up vs IFskina6-2010	2.67948	2.67948	SGGFPa6-2011 up vs IFskina6-2011
10458808	18750	NM_173423 // Fem1c // fem-1 homolog c (C.elegans) // 18 C|18 // 240263 /// ENSMUST00000	Fem1c	NM_173423	2.21087	2.21087	SGGFPa6-2010 up vs IFskina6-2010	3.58724	3.58724	SGGFPa6-2011 up vs IFskina6-2011
10427323	15423	NM_019817 // Copz1 // coatomer protein complex, subunit zeta 1 // 15 F3|15 6.0 cM // 56	Copz1	NM_019817	2.20962	2.20962	SGGFPa6-2010 up vs IFskina6-2010	3.14464	3.14464	SGGFPa6-2011 up vs IFskina6-2011
10556820	29347	NM_145586 // Tmem159 // transmembrane protein 159 // 7 F2|7 // 233806 /// ENSMUST000000	Tmem159	NM_145586	2.20787	2.20787	SGGFPa6-2010 up vs IFskina6-2010	3.09637	3.09637	SGGFPa6-2011 up vs IFskina6-2011
10537452	27046	NM_026612 // Ndufb2 // NADH dehydrogenase (ubiquinone) 1 beta subcomplex, 2 // 6 B1|6 /	Ndufb2	NM_026612	2.20703	2.20703	SGGFPa6-2010 up vs IFskina6-2010	2.43886	2.43886	SGGFPa6-2011 up vs IFskina6-2011
10599174	34190	NM_133990 // Il13ra1 // interleukin 13 receptor, alpha 1 // X A3.3|X 12.5 cM // 16164 /	Il13ra1	NM_133990	2.20371	2.20371	SGGFPa6-2010 up vs IFskina6-2010	3.17237	3.17237	SGGFPa6-2011 up vs IFskina6-2011
10604922	34956	NM_001033328 // BC023829 // cDNA sequence BC023829 // X A7.1-A7.2|X // 236848 /// BC138	BC023829	NM_001033328	2.20284	2.20284	SGGFPa6-2010 up vs IFskina6-2010	4.21558	4.21558	SGGFPa6-2011 up vs IFskina6-2011
10497090	22794	NM_001013806 // Ankrd13c // ankyrin repeat domain 13c // 3 H4|3 // 433667 /// ENSMUST00	Ankrd13c	NM_001013806	2.20111	2.20111	SGGFPa6-2010 up vs IFskina6-2010	5.20774	5.20774	SGGFPa6-2011 up vs IFskina6-2011
10507885	24046	NM_019660 // Mycbp // c-myc binding protein // 4 D2.2|4 // 56309 /// ENSMUST00000030400	Mycbp	NM_019660	2.19968	2.19968	SGGFPa6-2010 up vs IFskina6-2010	4.10073	4.10073	SGGFPa6-2011 up vs IFskina6-2011
10487154	21748	NM_177608 // Secisbp2l // SECIS binding protein 2-like // 2 F1|2 // 70354 /// ENSMUST00	Secisbp2l	NM_177608	2.19218	2.19218	SGGFPa6-2010 up vs IFskina6-2010	2.09304	2.09304	SGGFPa6-2011 up vs IFskina6-2011
10388996	11189	NM_018776 // Crlf3 // cytokine receptor-like factor 3 // 11 B5|11 47.21 cM // 54394 ///	Crlf3	NM_018776	2.19198	2.19198	SGGFPa6-2010 up vs IFskina6-2010	3.08924	3.08924	SGGFPa6-2011 up vs IFskina6-2011				Cell Adhesion
10516490	24964	NM_010291 // Gjb5 // gap junction protein, beta 5 // 4 D2.2|4 57.5 cM // 14622 /// ENSM	Gjb5	NM_010291	2.18487	2.18487	SGGFPa6-2010 up vs IFskina6-2010	2.55057	2.55057	SGGFPa6-2011 up vs IFskina6-2011				Cell Adhesion
10442986	17109	NM_028190 // Luc7l // Luc7 homolog (S. cerevisiae)-like // 17 B1|17 11.8 cM // 66978 //	Luc7l	NM_028190	2.18476	2.18476	SGGFPa6-2010 up vs IFskina6-2010	2.37176	2.37176	SGGFPa6-2011 up vs IFskina6-2011
10545339	27984	NM_025430 // Mrpl35 // mitochondrial ribosomal protein L35 // 6|6 C3 // 66223 /// ENSMU	Mrpl35	NM_025430	2.1841	2.1841	SGGFPa6-2010 up vs IFskina6-2010	2.88765	2.88765	SGGFPa6-2011 up vs IFskina6-2011
10439032	16632	NM_177326 // Pak2 // p21 protein (Cdc42/Rac)-activated kinase 2 // 16 B2|16 21.2 cM //	Pak2	NM_177326	2.18381	2.18381	SGGFPa6-2010 up vs IFskina6-2010	3.41685	3.41685	SGGFPa6-2011 up vs IFskina6-2011
10458398	18704	NM_008214 // Hars // histidyl-tRNA synthetase // 18 B2|18 // 15115 /// ENSMUST000000014	Hars	NM_008214	2.18369	2.18369	SGGFPa6-2010 up vs IFskina6-2010	3.81944	3.81944	SGGFPa6-2011 up vs IFskina6-2011
10535946	26887	NM_201369 // N4bp2l2 // NEDD4 binding protein 2-like 2 // 5 G3|5 // 381695 /// ENSMUST0	N4bp2l2	NM_201369	2.18369	2.18369	SGGFPa6-2010 up vs IFskina6-2010	4.56554	4.56554	SGGFPa6-2011 up vs IFskina6-2011				Microtubule
10403229	12674	NM_177290 // Itgb8 // integrin beta 8 // 12 F2|12 // 320910 /// ENSMUST00000026360 // I	Itgb8	NM_177290	2.18324	2.18324	SGGFPa6-2010 up vs IFskina6-2010	4.18259	4.18259	SGGFPa6-2011 up vs IFskina6-2011
10472162	20136	NM_010274 // Gpd2 // glycerol phosphate dehydrogenase 2, mitochondrial // 2 C1.1|2 33.0	Gpd2	NM_010274	2.18245	2.18245	SGGFPa6-2010 up vs IFskina6-2010	3.36419	3.36419	SGGFPa6-2011 up vs IFskina6-2011
10367076	8949	NM_008921 // Prim1 // DNA primase, p49 subunit // 10 D3|10 77.0 cM // 19075 /// ENSMUST	Prim1	NM_008921	2.17954	2.17954	SGGFPa6-2010 up vs IFskina6-2010	4.04902	4.04902	SGGFPa6-2011 up vs IFskina6-2011
10389680	11256	NM_054043 // Msi2 // Musashi homolog 2 (Drosophila) // 11 C|11 // 76626 /// ENSMUST0000	Msi2	NM_054043	2.17883	2.17883	SGGFPa6-2010 up vs IFskina6-2010	2.12796	2.12796	SGGFPa6-2011 up vs IFskina6-2011
10588547	33051	NM_001015507 // Vprbp // Vpr (HIV-1) binding protein // 9 F1|9 // 321006 /// ENSMUST000	Vprbp	NM_001015507	2.171	2.171	SGGFPa6-2010 up vs IFskina6-2010	2.87584	2.87584	SGGFPa6-2011 up vs IFskina6-2011
10468016	19718	NM_026061 // Ndufb8 // NADH dehydrogenase (ubiquinone) 1 beta subcomplex 8 // 19|19 D1	Ndufb8	NM_026061	2.17041	2.17041	SGGFPa6-2010 up vs IFskina6-2010	2.80011	2.80011	SGGFPa6-2011 up vs IFskina6-2011
10408902	13409	NM_001081059 // Ccdc90a // coiled-coil domain containing 90A // 13 A4|13 // 76137 /// E	Ccdc90a	NM_001081059	2.1702	2.1702	SGGFPa6-2010 up vs IFskina6-2010	2.69466	2.69466	SGGFPa6-2011 up vs IFskina6-2011
10359303	8120	ENSMUST00000028061 // 4930562F07Rik // RIKEN cDNA 4930562F07 gene // 1 H2.1|1 // 75255	4930562F07Rik	ENSMUST00000028061	2.1698	2.1698	SGGFPa6-2010 up vs IFskina6-2010	3.88944	3.88944	SGGFPa6-2011 up vs IFskina6-2011
10608613	35468	ENSMUST00000105540 // LOC100042196 // y-linked testis-specific protein 1-like // Y|Y //	LOC100042196	ENSMUST00000105540	2.16975	2.16975	SGGFPa6-2010 up vs IFskina6-2010	9.54421	9.54421	SGGFPa6-2011 up vs IFskina6-2011
10398085	12071	NM_028419 // Glrx5 // glutaredoxin 5 homolog (S. cerevisiae) // 12 E|12 // 73046 /// EN	Glrx5	NM_028419	2.16671	2.16671	SGGFPa6-2010 up vs IFskina6-2010	2.86314	2.86314	SGGFPa6-2011 up vs IFskina6-2011				Microtubule
10608420	35418	NM_009220 // Ssty1 // spermiogenesis specific transcript on the Y 1 // Y A1|Y // 20611	Ssty1	NM_009220	2.16571	2.16571	SGGFPa6-2010 up vs IFskina6-2010	6.76472	6.76472	SGGFPa6-2011 up vs IFskina6-2011
10476395	20638	NM_007553 // Bmp2 // bone morphogenetic protein 2 // 2 F2|2 76.1 cM // 12156 /// ENSMUS	Bmp2	NM_007553	2.16184	2.16184	SGGFPa6-2010 up vs IFskina6-2010	3.15668	3.15668	SGGFPa6-2011 up vs IFskina6-2011
10416709	14333	NM_172605 // Tdrd3 // tudor domain containing 3 // 14 E1|14 // 219249 /// BC005670 // T	Tdrd3	NM_172605	2.16012	2.16012	SGGFPa6-2010 up vs IFskina6-2010	3.95028	3.95028	SGGFPa6-2011 up vs IFskina6-2011
10565434	30432	NM_026533 // Rps13 // ribosomal protein S13 // 7|7 E1 // 68052 /// BC090397 // Rps13 //	Rps13	NM_026533	2.15932	2.15932	SGGFPa6-2010 up vs IFskina6-2010	2.16658	2.16658	SGGFPa6-2011 up vs IFskina6-2011
10471571	20062	NM_177345 // Mapkap1 // mitogen-activated protein kinase associated protein 1 // 2 B|2	Mapkap1	NM_177345	2.15818	2.15818	SGGFPa6-2010 up vs IFskina6-2010	4.21256	4.21256	SGGFPa6-2011 up vs IFskina6-2011
10417070	14387	NM_023579 // Ipo5 // importin 5 // 14 E5|14 // 70572 /// ENSMUST00000032898 // Ipo5 //	Ipo5	NM_023579	2.15671	2.15671	SGGFPa6-2010 up vs IFskina6-2010	3.62485	3.62485	SGGFPa6-2011 up vs IFskina6-2011
10386652	10979	NM_007437 // Aldh3a2 // aldehyde dehydrogenase family 3, subfamily A2 // 11 B2|11 34.3	Aldh3a2	NM_007437	2.15457	2.15457	SGGFPa6-2010 up vs IFskina6-2010	2.06147	2.06147	SGGFPa6-2011 up vs IFskina6-2011				Receptor
10507557	24003	NM_026932 // Ebna1bp2 // EBNA1 binding protein 2 // 4 D2.1|4 // 69072 /// NR_029469 //	Ebna1bp2	NM_026932	2.15357	2.15357	SGGFPa6-2010 up vs IFskina6-2010	3.50381	3.50381	SGGFPa6-2011 up vs IFskina6-2011				Receptor
10590597	33225	NM_030692 // Sacm1l // SAC1 (suppressor of actin mutations 1, homolog)-like (S. cerevis	Sacm1l	NM_030692	2.15278	2.15278	SGGFPa6-2010 up vs IFskina6-2010	3.78701	3.78701	SGGFPa6-2011 up vs IFskina6-2011				Receptor
10488195	21835	NM_024281 // Rrbp1 // ribosome binding protein 1 // 2 G1|2 // 81910 /// NM_133626 // Rr	Rrbp1	NM_024281	2.14991	2.14991	SGGFPa6-2010 up vs IFskina6-2010	2.00839	2.00839	SGGFPa6-2011 up vs IFskina6-2011				Receptor
10406482	13084	NM_023243 // Ccnh // cyclin H // 13 C3|13 // 66671 /// ENSMUST00000022030 // Ccnh // cy	Ccnh	NM_023243	2.14536	2.14536	SGGFPa6-2010 up vs IFskina6-2010	2.20006	2.20006	SGGFPa6-2011 up vs IFskina6-2011
10452892	18144	NM_133747 // Fam98a // family with sequence similarity 98, member A // 17 E2|17 // 7272	Fam98a	NM_133747	2.14187	2.14187	SGGFPa6-2010 up vs IFskina6-2010	3.60814	3.60814	SGGFPa6-2011 up vs IFskina6-2011
10414355	14002	NM_178684 // Mapk1ip1l // mitogen-activated protein kinase 1 interacting protein 1-like	Mapk1ip1l	NM_178684	2.14107	2.14107	SGGFPa6-2010 up vs IFskina6-2010	2.08004	2.08004	SGGFPa6-2011 up vs IFskina6-2011
10406672	13106	NM_009712 // Arsb // arylsulfatase B // 13 C3-D1|13 50.0 cM // 11881 /// ENSMUST0000009	Arsb	NM_009712	2.13823	2.13823	SGGFPa6-2010 up vs IFskina6-2010	2.17578	2.17578	SGGFPa6-2011 up vs IFskina6-2011				Intermediate Filament
10464974	19409	NM_030109 // Sf3b2 // splicing factor 3b, subunit 2 // 19 A|19 // 319322 /// ENSMUST000	Sf3b2	NM_030109	2.13468	2.13468	SGGFPa6-2010 up vs IFskina6-2010	2.63497	2.63497	SGGFPa6-2011 up vs IFskina6-2011				Intermediate Filament
10546891	28155	NM_133926 // Camk1 // calcium/calmodulin-dependent protein kinase I // 6 E3|6 48.7 cM /	Camk1	NM_133926	2.13243	2.13243	SGGFPa6-2010 up vs IFskina6-2010	2.33642	2.33642	SGGFPa6-2011 up vs IFskina6-2011				Intermediate Filament
10402783	12622	BC138468 // Ahnak2 // AHNAK nucleoprotein 2 // 12 F1|12 // 100041194 /// ENSMUST0000010	Ahnak2	BC138468	2.12407	2.12407	SGGFPa6-2010 up vs IFskina6-2010	2.03089	2.03089	SGGFPa6-2011 up vs IFskina6-2011
10593483	33558	NM_007996 // Fdx1 // ferredoxin 1 // 9|9 B // 14148 /// ENSMUST00000034552 // Fdx1 // f	Fdx1	NM_007996	2.12371	2.12371	SGGFPa6-2010 up vs IFskina6-2010	3.39948	3.39948	SGGFPa6-2011 up vs IFskina6-2011
10377652	10052	NM_019726 // Gps2 // G protein pathway suppressor 2 // 11 B3|11 // 56310 /// ENSMUST000	Gps2	NM_019726	2.12365	2.12365	SGGFPa6-2010 up vs IFskina6-2010	2.15433	2.15433	SGGFPa6-2011 up vs IFskina6-2011
10410435	13603	NM_198600 // Papd7 // PAP associated domain containing 7 // 13 C1|13 40.0 cM // 210106	Papd7	NM_198600	2.1233	2.1233	SGGFPa6-2010 up vs IFskina6-2010	2.47347	2.47347	SGGFPa6-2011 up vs IFskina6-2011
10516435	24958	NM_001114399 // Zmym4 // zinc finger, MYM-type 4 // 4 D2.2|4 // 67785 /// ENSMUST000001	Zmym4	NM_001114399	2.1148	2.1148	SGGFPa6-2010 up vs IFskina6-2010	4.97367	4.97367	SGGFPa6-2011 up vs IFskina6-2011
10438017	16521	NM_139232 // Fgd4 // FYVE, RhoGEF and PH domain containing 4 // 16 A3|16 // 224014 ///	Fgd4	NM_139232	2.11447	2.11447	SGGFPa6-2010 up vs IFskina6-2010	2.41055	2.41055	SGGFPa6-2011 up vs IFskina6-2011
10390352	11322	NM_008379 // Kpnb1 // karyopherin (importin) beta 1 // 11|11 D // 16211 /// ENSMUST0000	Kpnb1	NM_008379	2.11293	2.11293	SGGFPa6-2010 up vs IFskina6-2010	3.36971	3.36971	SGGFPa6-2011 up vs IFskina6-2011
10460626	18953	NM_026616 // Rnaseh2c // ribonuclease H2, subunit C // 19 A|19 // 68209 /// ENSMUST0000	Rnaseh2c	NM_026616	2.11281	2.11281	SGGFPa6-2010 up vs IFskina6-2010	2.08427	2.08427	SGGFPa6-2011 up vs IFskina6-2011
10372928	9540	NM_001163024 // Mon2 // MON2 homolog (yeast) // 10 D2|10 // 67074 /// NM_001163025 // M	Mon2	NM_001163024	2.10979	2.10979	SGGFPa6-2010 up vs IFskina6-2010	2.15634	2.15634	SGGFPa6-2011 up vs IFskina6-2011
10511580	24400	NM_001098230 // Pdp1 // pyruvate dehyrogenase phosphatase catalytic subunit 1 // 4 A1|4	Pdp1	NM_001098230	2.1017	2.1017	SGGFPa6-2010 up vs IFskina6-2010	2.02647	2.02647	SGGFPa6-2011 up vs IFskina6-2011
10581575	32264	NR_002928 // Gm1943 // WD repeat domain 70 pseudogene // 8 D3|8 // 384864 /// NM_001081	Gm1943	NR_002928	2.09889	2.09889	SGGFPa6-2010 up vs IFskina6-2010	4.1603	4.1603	SGGFPa6-2011 up vs IFskina6-2011
10434888	16195	NM_133752 // Opa1 // optic atrophy 1 homolog (human) // 16 B2|16 21.5 cM // 74143 /// E	Opa1	NM_133752	2.09752	2.09752	SGGFPa6-2010 up vs IFskina6-2010	4.01164	4.01164	SGGFPa6-2011 up vs IFskina6-2011
10545298	27981	NM_024288 // Rmnd5a // required for meiotic nuclear division 5 homolog A (S. cerevisiae	Rmnd5a	NM_024288	2.09689	2.09689	SGGFPa6-2010 up vs IFskina6-2010	2.2967	2.2967	SGGFPa6-2011 up vs IFskina6-2011
10458430	18710	NM_007858 // Diap1 // diaphanous homolog 1 (Drosophila) // 18 B3|18 16.0 cM // 13367 //	Diap1	NM_007858	2.09686	2.09686	SGGFPa6-2010 up vs IFskina6-2010	3.38308	3.38308	SGGFPa6-2011 up vs IFskina6-2011
10545932	28056	NM_025665 // Snrnp27 // small nuclear ribonucleoprotein 27 (U4/U6.U5) // 6 D1|6 // 6661	Snrnp27	NM_025665	2.09324	2.09324	SGGFPa6-2010 up vs IFskina6-2010	2.02593	2.02593	SGGFPa6-2011 up vs IFskina6-2011
10406287	13062	NM_001081352 // Ttc37 // tetratricopeptide repeat domain 37 // 13 C1|13 // 218343 /// E	Ttc37	NM_001081352	2.09303	2.09303	SGGFPa6-2010 up vs IFskina6-2010	2.09339	2.09339	SGGFPa6-2011 up vs IFskina6-2011				Cell Junction/Protein Transport
10542993	27686	NM_173006 // Pon3 // paraoxonase 3 // 6 A1|6 0.5 cM // 269823 /// ENSMUST00000031773 //	Pon3	NM_173006	2.08816	2.08816	SGGFPa6-2010 up vs IFskina6-2010	3.45493	3.45493	SGGFPa6-2011 up vs IFskina6-2011
10465336	19440	NM_026246 // Mrpl49 // mitochondrial ribosomal protein L49 // 19 A|19 3.0 cM // 18120 /	Mrpl49	NM_026246	2.08804	2.08804	SGGFPa6-2010 up vs IFskina6-2010	2.04807	2.04807	SGGFPa6-2011 up vs IFskina6-2011
10395005	11768	NM_001081378 // Kidins220 // kinase D-interacting substrate 220 // 12 A1.3|12 // 77480	Kidins220	NM_001081378	2.08699	2.08699	SGGFPa6-2010 up vs IFskina6-2010	2.09957	2.09957	SGGFPa6-2011 up vs IFskina6-2011
10427772	15479	NM_033074 // Tars // threonyl-tRNA synthetase // 15 A1|15 6.7 cM // 110960 /// ENSMUST0	Tars	NM_033074	2.08658	2.08658	SGGFPa6-2010 up vs IFskina6-2010	2.52029	2.52029	SGGFPa6-2011 up vs IFskina6-2011
10449295	17759	NM_026307 // Cuta // cutA divalent cation tolerance homolog (E. coli) // 17|17 B1 // 67	Cuta	NM_026307	2.08157	2.08157	SGGFPa6-2010 up vs IFskina6-2010	3.47644	3.47644	SGGFPa6-2011 up vs IFskina6-2011
10373964	9662	NM_172438 // Thoc5 // THO complex 5 // 11 A1|11 // 107829 /// ENSMUST00000038237 // Tho	Thoc5	NM_172438	2.07921	2.07921	SGGFPa6-2010 up vs IFskina6-2010	2.03048	2.03048	SGGFPa6-2011 up vs IFskina6-2011
10551293	28691	NM_007817 // Cyp2f2 // cytochrome P450, family 2, subfamily f, polypeptide 2 // 7 A3|7	Cyp2f2	NM_007817	2.07912	2.07912	SGGFPa6-2010 up vs IFskina6-2010	2.28603	2.28603	SGGFPa6-2011 up vs IFskina6-2011
10488156	21833	NM_001081133 // Kif16b // kinesin family member 16B // 2|2 G3 // 16558 /// ENSMUST00000	Kif16b	NM_001081133	2.07494	2.07494	SGGFPa6-2010 up vs IFskina6-2010	2.06836	2.06836	SGGFPa6-2011 up vs IFskina6-2011				Cell Cycle/Cytoskeleton
10467921	19712	NM_007700 // Chuk // conserved helix-loop-helix ubiquitous kinase // 19 C3|19 45.0 cM /	Chuk	NM_007700	2.074	2.074	SGGFPa6-2010 up vs IFskina6-2010	4.41608	4.41608	SGGFPa6-2011 up vs IFskina6-2011				Wnt Signaling Pathway
10421624	14855	NM_177381 // Cog3 // component of oligomeric golgi complex 3 // 14 D3|14 // 338337 ///	Cog3	NM_177381	2.07255	2.07255	SGGFPa6-2010 up vs IFskina6-2010	2.62845	2.62845	SGGFPa6-2011 up vs IFskina6-2011
10472933	20213	NM_029022 // Scrn3 // secernin 3 // 2 C3|2 // 74616 /// ENSMUST00000090811 // Scrn3 //	Scrn3	NM_029022	2.0719	2.0719	SGGFPa6-2010 up vs IFskina6-2010	2.66304	2.66304	SGGFPa6-2011 up vs IFskina6-2011
10568529	30881	NM_175115 // Ikzf5 // IKAROS family zinc finger 5 // 7 F3|7 // 67143 /// ENSMUST0000004	Ikzf5	NM_175115	2.07185	2.07185	SGGFPa6-2010 up vs IFskina6-2010	2.14385	2.14385	SGGFPa6-2011 up vs IFskina6-2011
10421758	14871	NM_001164503 // Akap11 // A kinase (PRKA) anchor protein 11 // 14 D3|14 // 219181 /// E	Akap11	NM_001164503	2.07161	2.07161	SGGFPa6-2010 up vs IFskina6-2010	2.64859	2.64859	SGGFPa6-2011 up vs IFskina6-2011
10505270	23774	NM_025286 // Slc31a2 // solute carrier family 31, member 2 // 4 B3|4 // 20530 /// ENSMU	Slc31a2	NM_025286	2.07054	2.07054	SGGFPa6-2010 up vs IFskina6-2010	2.66685	2.66685	SGGFPa6-2011 up vs IFskina6-2011
10565612	30462	NM_001177945 // 1810020D17Rik // RIKEN cDNA 1810020D17 gene // 7 E2|7 // 66273 /// NM_1	1810020D17Rik	NM_001177945	2.07008	2.07008	SGGFPa6-2010 up vs IFskina6-2010	2.20332	2.20332	SGGFPa6-2011 up vs IFskina6-2011
10527886	26077	NM_027777 // Pex1 // peroxisomal biogenesis factor 1 // 5|5 A2 // 71382 /// ENSMUST0000	Pex1	NM_027777	2.06992	2.06992	SGGFPa6-2010 up vs IFskina6-2010	2.397	2.397	SGGFPa6-2011 up vs IFskina6-2011
10463486	19280	NM_001037758 // Btrc // beta-transducin repeat containing protein // 19|19 D1 // 12234	Btrc	NM_001037758	2.06803	2.06803	SGGFPa6-2010 up vs IFskina6-2010	2.35637	2.35637	SGGFPa6-2011 up vs IFskina6-2011
10361807	8369	NM_010437 // Hivep2 // human immunodeficiency virus type I enhancer binding protein 2 /	Hivep2	NM_010437	2.06658	2.06658	SGGFPa6-2010 up vs IFskina6-2010	3.02465	3.02465	SGGFPa6-2011 up vs IFskina6-2011
10528077	26099	NM_013726 // Dbf4 // DBF4 homolog (S. cerevisiae) // 5|5 A2 // 27214 /// NM_001190717 /	Dbf4	NM_013726	2.06606	2.06606	SGGFPa6-2010 up vs IFskina6-2010	2.35705	2.35705	SGGFPa6-2011 up vs IFskina6-2011
10408952	13418	NM_175749 // Nup153 // nucleoporin 153 // 13 A5|13 // 218210 /// ENSMUST00000021803 //	Nup153	NM_175749	2.06343	2.06343	SGGFPa6-2010 up vs IFskina6-2010	2.73441	2.73441	SGGFPa6-2011 up vs IFskina6-2011
10428366	15549	ENSMUST00000100702 // Gm10383 // predicted gene 10383 // --- // 100038501	Gm10383	ENSMUST00000100702	2.06286	2.06286	SGGFPa6-2010 up vs IFskina6-2010	2.00375	2.00375	SGGFPa6-2011 up vs IFskina6-2011
10357051	7855	NM_027534 // Kdsr // 3-ketodihydrosphingosine reductase // 1 E2.1|1 // 70750 /// ENSMUS	Kdsr	NM_027534	2.06262	2.06262	SGGFPa6-2010 up vs IFskina6-2010	3.38409	3.38409	SGGFPa6-2011 up vs IFskina6-2011
10581499	32251	NM_145412 // Chtf8 // CTF8, chromosome transmission fidelity factor 8 homolog (S. cerev	Chtf8	NM_145412	2.06212	2.06212	SGGFPa6-2010 up vs IFskina6-2010	2.8748	2.8748	SGGFPa6-2011 up vs IFskina6-2011
10522668	25575	NM_025939 // Paics // phosphoribosylaminoimidazole carboxylase, phosphoribosylaminoribo	Paics	NM_025939	2.06201	2.06201	SGGFPa6-2010 up vs IFskina6-2010	13.2435	13.2435	SGGFPa6-2011 up vs IFskina6-2011
10355037	7666	NM_021312 // Wdr12 // WD repeat domain 12 // 1|1 C1-C2 // 57750 /// ENSMUST00000027173	Wdr12	NM_021312	2.06066	2.06066	SGGFPa6-2010 up vs IFskina6-2010	3.55187	3.55187	SGGFPa6-2011 up vs IFskina6-2011
10529549	26246	NM_001113362 // Tbc1d14 // TBC1 domain family, member 14 // 5 B3|5 20.0 cM // 100855 //	Tbc1d14	NM_001113362	2.06044	2.06044	SGGFPa6-2010 up vs IFskina6-2010	2.95284	2.95284	SGGFPa6-2011 up vs IFskina6-2011
10354275	7594	BC119032 // 1700029F09Rik // RIKEN cDNA 1700029F09 gene // 1 C1|1 // 75623 /// BC116881	1700029F09Rik	BC119032	2.06031	2.06031	SGGFPa6-2010 up vs IFskina6-2010	4.27439	4.27439	SGGFPa6-2011 up vs IFskina6-2011
10524676	25787	NM_025573 // Srsf9 // serine/arginine-rich splicing factor 9 // 5 F|5 // 108014 /// NR_	Srsf9	NM_025573	2.05888	2.05888	SGGFPa6-2010 up vs IFskina6-2010	2.47507	2.47507	SGGFPa6-2011 up vs IFskina6-2011
10416753	14340	NM_029320 // Pibf1 // progesterone immunomodulatory binding factor 1 // 14 E2.2|14 47.0	Pibf1	NM_029320	2.05702	2.05702	SGGFPa6-2010 up vs IFskina6-2010	4.16492	4.16492	SGGFPa6-2011 up vs IFskina6-2011
10461690	19060	NM_001033174 // Osbp // oxysterol binding protein // 19 A|19 7.0 cM // 76303 /// ENSMUS	Osbp	NM_001033174	2.05519	2.05519	SGGFPa6-2010 up vs IFskina6-2010	3.28316	3.28316	SGGFPa6-2011 up vs IFskina6-2011
10545760	28030	NM_146169 // Paip2b // poly(A) binding protein interacting protein 2B // 6 C3|6 // 2321	Paip2b	NM_146169	2.05375	2.05375	SGGFPa6-2010 up vs IFskina6-2010	2.28394	2.28394	SGGFPa6-2011 up vs IFskina6-2011
10513420	24610	NM_001134675 // Mup7 // major urinary protein 7 // 4 B3|4 // 100041658 /// NM_001135127	Mup7	NM_001134675	2.05339	2.05339	SGGFPa6-2010 up vs IFskina6-2010	5.14296	5.14296	SGGFPa6-2011 up vs IFskina6-2011
10480813	21099	NM_001024616 // B230208H17Rik // RIKEN cDNA B230208H17 gene // 2 A3|2 // 227624 /// ENS	B230208H17Rik	NM_001024616	2.05136	2.05136	SGGFPa6-2010 up vs IFskina6-2010	2.9564	2.9564	SGGFPa6-2011 up vs IFskina6-2011
10490854	22135	NM_001037926 // Gm13051 // predicted gene 13051 // 4 E1|4 // 626316 /// NM_001127188 //	Gm13051	NM_001037926	2.04981	2.04981	SGGFPa6-2010 up vs IFskina6-2010	5.61323	5.61323	SGGFPa6-2011 up vs IFskina6-2011
10376733	9975	NM_008928 // Map2k3 // mitogen-activated protein kinase kinase 3 // 11 B2|11 // 26397 /	Map2k3	NM_008928	2.04904	2.04904	SGGFPa6-2010 up vs IFskina6-2010	2.24574	2.24574	SGGFPa6-2011 up vs IFskina6-2011
10437778	16505	NM_028761 // Parn // poly(A)-specific ribonuclease (deadenylation nuclease) // 16|16 B1	Parn	NM_028761	2.04875	2.04875	SGGFPa6-2010 up vs IFskina6-2010	2.32873	2.32873	SGGFPa6-2011 up vs IFskina6-2011
10505931	23854	NM_026319 // Ift74 // intraflagellar transport 74 homolog (Chlamydomonas) // 4 C5|4 //	Ift74	NM_026319	2.04809	2.04809	SGGFPa6-2010 up vs IFskina6-2010	2.25153	2.25153	SGGFPa6-2011 up vs IFskina6-2011				Cell Cycle/Txn
10589723	33139	NM_001164838 // Lrrfip2 // leucine rich repeat (in FLII) interacting protein 2 // 9|9 F	Lrrfip2	NM_001164838	2.04633	2.04633	SGGFPa6-2010 up vs IFskina6-2010	2.82309	2.82309	SGGFPa6-2011 up vs IFskina6-2011
10525452	25847	NM_030564 // Rnf34 // ring finger protein 34 // 5 F|5 // 80751 /// ENSMUST00000031434 /	Rnf34	NM_030564	2.04493	2.04493	SGGFPa6-2010 up vs IFskina6-2010	4.62309	4.62309	SGGFPa6-2011 up vs IFskina6-2011
10401900	12523	NM_001039089 // Sel1l // sel-1 suppressor of lin-12-like (C. elegans) // 12|12 E // 203	Sel1l	NM_001039089	2.04473	2.04473	SGGFPa6-2010 up vs IFskina6-2010	2.22269	2.22269	SGGFPa6-2011 up vs IFskina6-2011
10472277	20145	NM_020575 // March7 // membrane-associated ring finger (C3HC4) 7 // 2|2 C3 // 57438 ///	2012-03-07	NM_020575	2.04228	2.04228	SGGFPa6-2010 up vs IFskina6-2010	3.01979	3.01979	SGGFPa6-2011 up vs IFskina6-2011
10397543	12005	NM_001177565 // Gm8300 // predicted gene 8300 // 12 D2|12 // 666806 /// NM_001177574 //	Gm8300	NM_001177565	2.04197	2.04197	SGGFPa6-2010 up vs IFskina6-2010	16.7927	16.7927	SGGFPa6-2011 up vs IFskina6-2011
10377255	10018	NM_018768 // Stx8 // syntaxin 8 // 11 B3|11 // 55943 /// ENSMUST00000021285 // Stx8 //	Stx8	NM_018768	2.03988	2.03988	SGGFPa6-2010 up vs IFskina6-2010	2.32341	2.32341	SGGFPa6-2011 up vs IFskina6-2011
10498485	22974	NM_015728 // Slc33a1 // solute carrier family 33 (acetyl-CoA transporter), member 1 //	Slc33a1	NM_015728	2.03978	2.03978	SGGFPa6-2010 up vs IFskina6-2010	4.6955	4.6955	SGGFPa6-2011 up vs IFskina6-2011
10405916	13016	NM_183146 // A530054K11Rik // RIKEN cDNA A530054K11 gene // 13 B3|13 // 212281 /// NM_1	A530054K11Rik	NM_183146	2.03952	2.03952	SGGFPa6-2010 up vs IFskina6-2010	15.4963	15.4963	SGGFPa6-2011 up vs IFskina6-2011				Txn Regulation
10486616	21720	NM_009461 // Ubr1 // ubiquitin protein ligase E3 component n-recognin 1 // 2 E5|2 67.4	Ubr1	NM_009461	2.03944	2.03944	SGGFPa6-2010 up vs IFskina6-2010	2.09473	2.09473	SGGFPa6-2011 up vs IFskina6-2011
10455483	18407	NM_001163013 // Ythdc2 // YTH domain containing 2 // 18 B3|18 // 240255 /// ENSMUST0000	Ythdc2	NM_001163013	2.03944	2.03944	SGGFPa6-2010 up vs IFskina6-2010	2.04572	2.04572	SGGFPa6-2011 up vs IFskina6-2011
10455346	18394	NM_001039474 // Tcerg1 // transcription elongation regulator 1 (CA150) // 18 B3|18 // 5	Tcerg1	NM_001039474	2.03916	2.03916	SGGFPa6-2010 up vs IFskina6-2010	2.22012	2.22012	SGGFPa6-2011 up vs IFskina6-2011
10490672	22106	NM_001165991 // Arfrp1 // ADP-ribosylation factor related protein 1 // 2 H4|2 // 76688	Arfrp1	NM_001165991	2.03755	2.03755	SGGFPa6-2010 up vs IFskina6-2010	2.21908	2.21908	SGGFPa6-2011 up vs IFskina6-2011
10428081	15519	NM_008287 // Hrsp12 // heat-responsive protein 12 // 15|15 B3.3 // 15473 /// ENSMUST000	Hrsp12	NM_008287	2.03621	2.03621	SGGFPa6-2010 up vs IFskina6-2010	4.40188	4.40188	SGGFPa6-2011 up vs IFskina6-2011
10453575	18209	NM_029402 // Cul2 // cullin 2 // 18 A1|18 // 71745 /// ENSMUST00000162301 // Cul2 // cu	Cul2	NM_029402	2.03564	2.03564	SGGFPa6-2010 up vs IFskina6-2010	3.07788	3.07788	SGGFPa6-2011 up vs IFskina6-2011
10460221	18905	NM_013490 // Chka // choline kinase alpha // 19 A|19 3.0 cM // 12660 /// NM_001025566 /	Chka	NM_013490	2.03304	2.03304	SGGFPa6-2010 up vs IFskina6-2010	2.45184	2.45184	SGGFPa6-2011 up vs IFskina6-2011				Receptor
10406254	13057	NM_138953 // Ell2 // elongation factor RNA polymerase II 2 // 13 C1|13 // 192657 /// EN	Ell2	NM_138953	2.03277	2.03277	SGGFPa6-2010 up vs IFskina6-2010	2.04497	2.04497	SGGFPa6-2011 up vs IFskina6-2011
10379560	10224	NM_025884 // Zfp830 // zinc finger protein 830 // 11 C|11 // 66983 /// ENSMUST000000566	Zfp830	NM_025884	2.03255	2.03255	SGGFPa6-2010 up vs IFskina6-2010	2.7032	2.7032	SGGFPa6-2011 up vs IFskina6-2011
10372121	9460	NM_001033332 // Tmtc3 // transmembrane and tetratricopeptide repeat containing 3 // 10	Tmtc3	NM_001033332	2.03141	2.03141	SGGFPa6-2010 up vs IFskina6-2010	2.23513	2.23513	SGGFPa6-2011 up vs IFskina6-2011
10388010	11080	NM_007573 // C1qbp // complement component 1, q subcomponent binding protein // 11 B4|1	C1qbp	NM_007573	2.03095	2.03095	SGGFPa6-2010 up vs IFskina6-2010	2.31204	2.31204	SGGFPa6-2011 up vs IFskina6-2011				Notch Signaling Pathway
10543650	27750	NM_177296 // Tnpo3 // transportin 3 // 6 A3|6 7.2 cM // 320938 /// ENSMUST00000012679 /	Tnpo3	NM_177296	2.02985	2.02985	SGGFPa6-2010 up vs IFskina6-2010	2.62196	2.62196	SGGFPa6-2011 up vs IFskina6-2011
10473650	20370	NM_021512 // Nup160 // nucleoporin 160 // 2 E1|2 // 59015 /// ENSMUST00000057481 // Nup	Nup160	NM_021512	2.02725	2.02725	SGGFPa6-2010 up vs IFskina6-2010	2.58622	2.58622	SGGFPa6-2011 up vs IFskina6-2011
10385842	10883	NM_009012 // Rad50 // RAD50 homolog (S. cerevisiae) // 11 A5-B1|11 28.9 cM // 19360 ///	Rad50	NM_009012	2.02631	2.02631	SGGFPa6-2010 up vs IFskina6-2010	12.4843	12.4843	SGGFPa6-2011 up vs IFskina6-2011
10590191	33183	NM_026236 // Wdr48 // WD repeat domain 48 // 9 F4|9 // 67561 /// NM_028976 // Gorasp1 /	Wdr48	NM_026236	2.02481	2.02481	SGGFPa6-2010 up vs IFskina6-2010	3.98316	3.98316	SGGFPa6-2011 up vs IFskina6-2011
10374793	9741	NM_027869 // Pnpt1 // polyribonucleotide nucleotidyltransferase 1 // 11|11 A4 // 71701	Pnpt1	NM_027869	2.02204	2.02204	SGGFPa6-2010 up vs IFskina6-2010	2.52499	2.52499	SGGFPa6-2011 up vs IFskina6-2011
10516551	24972	NM_029036 // S100pbp // S100P binding protein // 4|4 D2.3 // 74648 /// ENSMUST000001060	S100pbp	NM_029036	2.02102	2.02102	SGGFPa6-2010 up vs IFskina6-2010	2.0059	2.0059	SGGFPa6-2011 up vs IFskina6-2011
10373388	9575	NM_027257 // Obfc2b // oligonucleotide/oligosaccharide-binding fold containing 2B // 10	Obfc2b	NM_027257	2.0193	2.0193	SGGFPa6-2010 up vs IFskina6-2010	5.13719	5.13719	SGGFPa6-2011 up vs IFskina6-2011
10568217	30836	NM_023203 // Dctpp1 // dCTP pyrophosphatase 1 // 7 F3|7 // 66422 /// ENSMUST00000035276	Dctpp1	NM_023203	2.01861	2.01861	SGGFPa6-2010 up vs IFskina6-2010	2.17077	2.17077	SGGFPa6-2011 up vs IFskina6-2011
10396074	11877	NM_146035 // Mgat2 // mannoside acetylglucosaminyltransferase 2 // 12 C2|12 // 217664 /	Mgat2	NM_146035	2.01733	2.01733	SGGFPa6-2010 up vs IFskina6-2010	3.37309	3.37309	SGGFPa6-2011 up vs IFskina6-2011
10430020	15728	NM_025842 // Vps28 // vacuolar protein sorting 28 (yeast) // 15 D3|15 // 66914 /// ENSM	Vps28	NM_025842	2.01369	2.01369	SGGFPa6-2010 up vs IFskina6-2010	2.0059	2.0059	SGGFPa6-2011 up vs IFskina6-2011
10564857	30373	NM_173011 // Idh2 // isocitrate dehydrogenase 2 (NADP+), mitochondrial // 7 D3|7 41.0 c	Idh2	NM_173011	2.01326	2.01326	SGGFPa6-2010 up vs IFskina6-2010	2.29028	2.29028	SGGFPa6-2011 up vs IFskina6-2011
10513437	24612	NM_001164526 // Mup11 // major urinary protein 11 // 4 B3|4 // 100039028 /// NM_0010455	Mup11	NM_001164526	2.01131	2.01131	SGGFPa6-2010 up vs IFskina6-2010	6.65589	6.65589	SGGFPa6-2011 up vs IFskina6-2011
10597288	33933	NM_026810 // Mlh1 // mutL homolog 1 (E. coli) // 9 F3|9 62.0 cM // 17350 /// ENSMUST000	Mlh1	NM_026810	2.01009	2.01009	SGGFPa6-2010 up vs IFskina6-2010	2.21556	2.21556	SGGFPa6-2011 up vs IFskina6-2011
10528238	26125	NM_172992 // Phtf2 // putative homeodomain transcription factor 2 // 5 A3|5 // 68770 //	Phtf2	NM_172992	2.00985	2.00985	SGGFPa6-2010 up vs IFskina6-2010	2.65034	2.65034	SGGFPa6-2011 up vs IFskina6-2011
10462670	19195	NM_019428 // Rpp30 // ribonuclease P/MRP 30 subunit (human) // 19 C2|19 // 54364 /// EN	Rpp30	NM_019428	2.00964	2.00964	SGGFPa6-2010 up vs IFskina6-2010	2.19774	2.19774	SGGFPa6-2011 up vs IFskina6-2011
10578916	31975	NM_025436 // Sc4mol // sterol-C4-methyl oxidase-like // 8 B3.1|8 // 66234 /// ENSMUST00	Sc4mol	NM_025436	2.00908	2.00908	SGGFPa6-2010 up vs IFskina6-2010	6.35232	6.35232	SGGFPa6-2011 up vs IFskina6-2011
10385382	10824	NM_134114 // Sft2d1 // SFT2 domain containing 1 // 17 A1|17 // 106489 /// BC091770 // S	Sft2d1	NM_134114	2.00649	2.00649	SGGFPa6-2010 up vs IFskina6-2010	2.57868	2.57868	SGGFPa6-2011 up vs IFskina6-2011
10550029	28515	NM_022981 // Zfp110 // zinc finger protein 110 // 7 A1|7 4.0 cM // 65020 /// ENSMUST000	Zfp110	NM_022981	2.00462	2.00462	SGGFPa6-2010 up vs IFskina6-2010	3.479	3.479	SGGFPa6-2011 up vs IFskina6-2011
10479775	21002	NM_015765 // Hspa14 // heat shock protein 14 // 2 A1|2 // 50497 /// ENSMUST00000027961	Hspa14	NM_015765	2.00362	2.00362	SGGFPa6-2010 up vs IFskina6-2010	3.04476	3.04476	SGGFPa6-2011 up vs IFskina6-2011
10430929	15827	NR_027799 // Tbrg3 // transforming growth factor beta regulated gene 3 // 15 E1|15 // 2	Tbrg3	NR_027799	2.00255	2.00255	SGGFPa6-2010 up vs IFskina6-2010	2.64126	2.64126	SGGFPa6-2011 up vs IFskina6-2011
10446771	17490	NM_001081071 // Lclat1 // lysocardiolipin acyltransferase 1 // 17 E2|17 // 225010 /// N	Lclat1	NM_001081071	2.00224	2.00224	SGGFPa6-2010 up vs IFskina6-2010	2.45581	2.45581	SGGFPa6-2011 up vs IFskina6-2011
10404717	12870	NM_026550 // Pak1ip1 // PAK1 interacting protein 1 // 13 A3.3|13 // 68083 /// ENSMUST00	Pak1ip1	NM_026550	2.00224	2.00224	SGGFPa6-2010 up vs IFskina6-2010	4.8985	4.8985	SGGFPa6-2011 up vs IFskina6-2011
10451238	17995	NM_009085 // Polr1c // polymerase (RNA) I polypeptide C // 17 C|17 // 20016 /// ENSMUST	Polr1c	NM_009085	2.00175	2.00175	SGGFPa6-2010 up vs IFskina6-2010	2.77759	2.77759	SGGFPa6-2011 up vs IFskina6-2011
10583535	32511	NM_008319 // Icam5 // intercellular adhesion molecule 5, telencephalin // 9 A3|9 7.0 cM	Icam5	NM_008319	0.5	-2	SGGFPa6-2010 down vs IFskina6-2010	0.382976	-2.61113	SGGFPa6-2011 down vs IFskina6-2011
10375793	9862	NM_146909 // Olfr51 // olfactory receptor 51 // 11 B1.3|11 // 18351 /// ENSMUST00000076	Olfr51	NM_146909	0.499756	-2.00098	SGGFPa6-2010 down vs IFskina6-2010	0.380726	-2.62656	SGGFPa6-2011 down vs IFskina6-2011
10531724	26481	NM_139198 // Plac8 // placenta-specific 8 // 5 E3|5 54.0 cM // 231507 /// ENSMUST000000	Plac8	NM_139198	0.499756	-2.00098	SGGFPa6-2010 down vs IFskina6-2010	0.359719	-2.77995	SGGFPa6-2011 down vs IFskina6-2011
10414741	14067	ENSMUST00000103612 // Gm8736 // predicted gene 8736 // 14 C2|14 // 667626 /// ENSMUST00	Gm8736	ENSMUST00000103612	0.499364	-2.00255	SGGFPa6-2010 down vs IFskina6-2010	0.493242	-2.0274	SGGFPa6-2011 down vs IFskina6-2011
10520173	25342	NM_183000 // Accn3 // amiloride-sensitive cation channel 3 // 5 A3|5 // 171209 /// ENSM	Accn3	NM_183000	0.499333	-2.00267	SGGFPa6-2010 down vs IFskina6-2010	0.489812	-2.0416	SGGFPa6-2011 down vs IFskina6-2011
10361895	8381	NM_053008 // Olig3 // oligodendrocyte transcription factor 3 // 10 A3|10 // 94222 /// E	Olig3	NM_053008	0.49913	-2.00349	SGGFPa6-2010 down vs IFskina6-2010	0.33732	-2.96454	SGGFPa6-2011 down vs IFskina6-2011				Cell Cycle Control
10373400	9577	NM_172259 // Myl6b // myosin, light polypeptide 6B // 10 D3|10 // 216459 /// ENSMUST000	Myl6b	NM_172259	0.499053	-2.0038	SGGFPa6-2010 down vs IFskina6-2010	0.355291	-2.8146	SGGFPa6-2011 down vs IFskina6-2011
10418846	14550	NM_001195097 // 3425401B19Rik // RIKEN cDNA 3425401B19 gene // 14 B|14 // 432836	3425401B19Rik	NM_001195097	0.498905	-2.00439	SGGFPa6-2010 down vs IFskina6-2010	0.436352	-2.29173	SGGFPa6-2011 down vs IFskina6-2011
10532716	26588	NR_033216 // 1700069L16Rik // RIKEN cDNA 1700069L16 gene // 5 F|5 // 381707	1700069L16Rik	NR_033216	0.49866	-2.00537	SGGFPa6-2010 down vs IFskina6-2010	0.427141	-2.34115	SGGFPa6-2011 down vs IFskina6-2011
10491993	22266	NM_153156 // Stoml3 // stomatin (Epb7.2)-like 3 // 3 C|3 // 229277 /// ENSMUST000000293	Stoml3	NM_153156	0.498492	-2.00605	SGGFPa6-2010 down vs IFskina6-2010	0.412675	-2.42322	SGGFPa6-2011 down vs IFskina6-2011
10591754	33364	NM_181419 // Zfp599 // zinc finger protein 599 // 9 A3|9 // 235048 /// ENSMUST000000862	Zfp599	NM_181419	0.498481	-2.0061	SGGFPa6-2010 down vs IFskina6-2010	0.408191	-2.44984	SGGFPa6-2011 down vs IFskina6-2011
10598598	34114	NM_026096 // 1700054O13Rik // RIKEN cDNA 1700054O13 gene // X|X A1.2 // 67334 /// BC059	1700054O13Rik	NM_026096	0.498139	-2.00747	SGGFPa6-2010 down vs IFskina6-2010	0.493735	-2.02538	SGGFPa6-2011 down vs IFskina6-2011				ECM/Signal
10403996	12767	NM_134212 // Vmn1r200 // vomeronasal 1 receptor 200 // 13 A3.1|13 // 171246 /// ENSMUST	Vmn1r200	NM_134212	0.497751	-2.00904	SGGFPa6-2010 down vs IFskina6-2010	0.494406	-2.02263	SGGFPa6-2011 down vs IFskina6-2011
10397786	12043	NR_033653 // Kif4b // kinesin family member 4B // 12 E|12 // 74947	Kif4b	NR_033653	0.497541	-2.00988	SGGFPa6-2010 down vs IFskina6-2010	0.372826	-2.68222	SGGFPa6-2011 down vs IFskina6-2011
10490094	22043	NR_027825 // 4930470P17Rik // RIKEN cDNA 4930470P17 gene // 2 H3|2 // 67637	4930470P17Rik	NR_027825	0.497512	-2.01	SGGFPa6-2010 down vs IFskina6-2010	0.385168	-2.59627	SGGFPa6-2011 down vs IFskina6-2011
10535780	26870	NM_010229 // Flt3 // FMS-like tyrosine kinase 3 // 5 G3|5 82.0 cM // 14255 /// ENSMUST0	Flt3	NM_010229	0.497464	-2.0102	SGGFPa6-2010 down vs IFskina6-2010	0.465567	-2.14792	SGGFPa6-2011 down vs IFskina6-2011
10360463	8243	NM_176916 // Pld5 // phospholipase D family, member 5 // 1 H4|1 // 319455 /// NM_001195	Pld5	NM_176916	0.497169	-2.01139	SGGFPa6-2010 down vs IFskina6-2010	0.414712	-2.41131	SGGFPa6-2011 down vs IFskina6-2011
10353320	7504	NM_030033 // Crisp4 // cysteine-rich secretory protein 4 // 1 A3|1 // 78081 /// ENSMUST	Crisp4	NM_030033	0.496963	-2.01222	SGGFPa6-2010 down vs IFskina6-2010	0.232208	-4.30648	SGGFPa6-2011 down vs IFskina6-2011
10409934	13526	NM_019539 // Cts7 // cathepsin 7 // 13 B2|13 // 56092 /// ENSMUST00000021892 // Cts7 //	Cts7	NM_019539	0.496893	-2.01251	SGGFPa6-2010 down vs IFskina6-2010	0.494407	-2.02262	SGGFPa6-2011 down vs IFskina6-2011
10537296	27027	NR_030524 // Mir490 // microRNA 490 // 6|6 // 735279	Mir490	NR_030524	0.496892	-2.01251	SGGFPa6-2010 down vs IFskina6-2010	0.292045	-3.42413	SGGFPa6-2011 down vs IFskina6-2011
10398929	12192	NM_201646 // Btbd6 // BTB (POZ) domain containing 6 // 12 F1|12 // 399566 /// NM_001145	Btbd6	NM_201646	0.496831	-2.01276	SGGFPa6-2010 down vs IFskina6-2010	0.252859	-3.95478	SGGFPa6-2011 down vs IFskina6-2011
10548857	28375	NM_175652 // Hist4h4 // histone cluster 4, H4 // 6 G1|6 // 320332	Hist4h4	NM_175652	0.496803	-2.01287	SGGFPa6-2010 down vs IFskina6-2010	0.396479	-2.5222	SGGFPa6-2011 down vs IFskina6-2011				Receptor
10425763	15263	NM_010006 // Cyp2d9 // cytochrome P450, family 2, subfamily d, polypeptide 9 // 15 E1|1	Cyp2d9	NM_010006	0.496717	-2.01322	SGGFPa6-2010 down vs IFskina6-2010	0.492269	-2.03141	SGGFPa6-2011 down vs IFskina6-2011				Receptor
10543140	27702	NR_003631 // Gm6578 // mitochondrial ribosomal protein L32 pseudogene // 6 A1|6 // 6253	Gm6578	NR_003631	0.496493	-2.01413	SGGFPa6-2010 down vs IFskina6-2010	0.428445	-2.33402	SGGFPa6-2011 down vs IFskina6-2011
10516926	25007	NM_026039 // Med18 // mediator of RNA polymerase II transcription, subunit 18 homolog (	Med18	NM_026039	0.496449	-2.01431	SGGFPa6-2010 down vs IFskina6-2010	0.390491	-2.56088	SGGFPa6-2011 down vs IFskina6-2011
10515399	24838	NM_013807 // Plk3 // polo-like kinase 3 (Drosophila) // 4 D1|4 // 12795 /// ENSMUST0000	Plk3	NM_013807	0.496393	-2.01453	SGGFPa6-2010 down vs IFskina6-2010	0.307252	-3.25466	SGGFPa6-2011 down vs IFskina6-2011
10440655	16846	NM_027173 // 2310079G19Rik // RIKEN cDNA 2310079G19 gene // 16 C3.3|16 // 69699 /// ENS	2310079G19Rik	NM_027173	0.496024	-2.01603	SGGFPa6-2010 down vs IFskina6-2010	0.455714	-2.19436	SGGFPa6-2011 down vs IFskina6-2011
10552121	28796	NM_009596 // Abpa // androgen binding protein alpha // 7 B1|7 10.0 cM // 11354 /// ENSM	Abpa	NM_009596	0.495829	-2.01682	SGGFPa6-2010 down vs IFskina6-2010	0.446505	-2.23962	SGGFPa6-2011 down vs IFskina6-2011
10365792	8815	NM_175488 // Ccdc38 // coiled-coil domain containing 38 // 10 C2|10 // 237465 /// ENSMU	Ccdc38	NM_175488	0.49576	-2.01711	SGGFPa6-2010 down vs IFskina6-2010	0.484684	-2.0632	SGGFPa6-2011 down vs IFskina6-2011
10414491	14024	NM_146298 // Olfr746 // olfactory receptor 746 // 14 C3-D1|14 // 258295 /// ENSMUST0000	Olfr746	NM_146298	0.495134	-2.01966	SGGFPa6-2010 down vs IFskina6-2010	0.31497	-3.1749	SGGFPa6-2011 down vs IFskina6-2011
10548043	28268	NM_145983 // Kcna5 // potassium voltage-gated channel, shaker-related subfamily, member	Kcna5	NM_145983	0.495118	-2.01972	SGGFPa6-2010 down vs IFskina6-2010	0.400991	-2.49382	SGGFPa6-2011 down vs IFskina6-2011
10555378	29146	NM_009464 // Ucp3 // uncoupling protein 3 (mitochondrial, proton carrier) // 7 E3|7 50.	Ucp3	NM_009464	0.495118	-2.01972	SGGFPa6-2010 down vs IFskina6-2010	0.433193	-2.30844	SGGFPa6-2011 down vs IFskina6-2011
10594638	33666	NM_026674 // Aph1c // anterior pharynx defective 1c homolog (C. elegans) // 9 C|9 // 68	Aph1c	NM_026674	0.494988	-2.02025	SGGFPa6-2010 down vs IFskina6-2010	0.436926	-2.28872	SGGFPa6-2011 down vs IFskina6-2011
10595050	33710	NM_205844 // Gfral // GDNF family receptor alpha like // 9 D|9 // 404194 /// ENSMUST000	Gfral	NM_205844	0.494753	-2.02121	SGGFPa6-2010 down vs IFskina6-2010	0.2899	-3.44946	SGGFPa6-2011 down vs IFskina6-2011
10538965	27244	NM_017399 // Fabp1 // fatty acid binding protein 1, liver // 6 C1|6 30.0 cM // 14080 //	Fabp1	NM_017399	0.494669	-2.02155	SGGFPa6-2010 down vs IFskina6-2010	0.359066	-2.78501	SGGFPa6-2011 down vs IFskina6-2011				Receptor
10476633	20664	NM_008792 // Pcsk2 // proprotein convertase subtilisin/kexin type 2 // 2 F3-H2|2 81.4 c	Pcsk2	NM_008792	0.494558	-2.02201	SGGFPa6-2010 down vs IFskina6-2010	0.456447	-2.19083	SGGFPa6-2011 down vs IFskina6-2011				Receptor
10485794	21656	NM_146401 // Olfr1305 // olfactory receptor 1305 // 2 E5|2 // 258396 /// ENSMUST0000009	Olfr1305	NM_146401	0.494469	-2.02237	SGGFPa6-2010 down vs IFskina6-2010	0.369112	-2.70921	SGGFPa6-2011 down vs IFskina6-2011
10414481	14019	NM_207133 // Olfr741 // olfactory receptor 741 // 14 C1|14 // 258233 /// ENSMUST0000007	Olfr741	NM_207133	0.494469	-2.02237	SGGFPa6-2010 down vs IFskina6-2010	0.413196	-2.42016	SGGFPa6-2011 down vs IFskina6-2011
10563820	30133	NM_001160345 // Svip // small VCP/p97-interacting protein // 7 B4|7 // 75744 /// NR_027	Svip	NM_001160345	0.494181	-2.02355	SGGFPa6-2010 down vs IFskina6-2010	0.467054	-2.14108	SGGFPa6-2011 down vs IFskina6-2011
10464761	19390	NM_134164 // Syt12 // synaptotagmin XII // 19 A|19 // 171180 /// ENSMUST00000059295 //	Syt12	NM_134164	0.493563	-2.02608	SGGFPa6-2010 down vs IFskina6-2010	0.245329	-4.07616	SGGFPa6-2011 down vs IFskina6-2011
10552594	28873	NM_010114 // Klk1b22 // kallikrein 1-related peptidase b22 // 7 B4|7 23.07 cM // 13646	Klk1b22	NM_010114	0.493488	-2.02639	SGGFPa6-2010 down vs IFskina6-2010	0.216586	-4.6171	SGGFPa6-2011 down vs IFskina6-2011
10496975	22781	NM_001081263 // Slc44a5 // solute carrier family 44, member 5 // 3 H3-H4|3 // 242259 //	Slc44a5	NM_001081263	0.493264	-2.02731	SGGFPa6-2010 down vs IFskina6-2010	0.369112	-2.70921	SGGFPa6-2011 down vs IFskina6-2011
10414211	13980	NM_010775 // Mbl1 // mannose-binding lectin (protein A) 1 // 14 B|14 15.0 cM // 17194 /	Mbl1	NM_010775	0.492505	-2.03044	SGGFPa6-2010 down vs IFskina6-2010	0.303055	-3.29973	SGGFPa6-2011 down vs IFskina6-2011
10514818	24770	NM_183182 // BC055111 // cDNA sequence BC055111 // 4 C7|4 // 242602 /// ENSMUST00000067	BC055111	NM_183182	0.492159	-2.03186	SGGFPa6-2010 down vs IFskina6-2010	0.499616	-2.00154	SGGFPa6-2011 down vs IFskina6-2011				Cytoskeleton
10484486	21384	ENSMUST00000099933 // P2rx3 // purinergic receptor P2X, ligand-gated ion channel, 3 //	P2rx3	ENSMUST00000099933	0.492159	-2.03186	SGGFPa6-2010 down vs IFskina6-2010	0.431255	-2.31882	SGGFPa6-2011 down vs IFskina6-2011
10412392	13781	ENSMUST00000099152 // Gm10732 // predicted gene 10732 // --- // 100038690	Gm10732	ENSMUST00000099152	0.491779	-2.03343	SGGFPa6-2010 down vs IFskina6-2010	0.430147	-2.32479	SGGFPa6-2011 down vs IFskina6-2011
10472155	20135	NM_008426 // Kcnj3 // potassium inwardly-rectifying channel, subfamily J, member 3 // 2	Kcnj3	NM_008426	0.491722	-2.03367	SGGFPa6-2010 down vs IFskina6-2010	0.470275	-2.12642	SGGFPa6-2011 down vs IFskina6-2011
10376938	9997	NM_025496 // Cdrt4 // CMT1A duplicated region transcript 4 // 11 B2-B3|11 // 66338 ///	Cdrt4	NM_025496	0.491678	-2.03385	SGGFPa6-2010 down vs IFskina6-2010	0.394555	-2.5345	SGGFPa6-2011 down vs IFskina6-2011
10405253	12932	NM_009946 // Cplx2 // complexin 2 // 13 B1|13 // 12890 /// ENSMUST00000026985 // Cplx2	Cplx2	NM_009946	0.491609	-2.03414	SGGFPa6-2010 down vs IFskina6-2010	0.434716	-2.30035	SGGFPa6-2011 down vs IFskina6-2011
10345032	6683	NM_010552 // Il17a // interleukin 17A // 1|1 A // 16171 /// ENSMUST00000027061 // Il17a	Il17a	NM_010552	0.491495	-2.03461	SGGFPa6-2010 down vs IFskina6-2010	0.476187	-2.10002	SGGFPa6-2011 down vs IFskina6-2011
10608041	35347	NM_011253 // Rbmy1a1 // RNA binding motif protein, Y chromosome, family 1, member A1 //	Rbmy1a1	NM_011253	0.49145	-2.03479	SGGFPa6-2010 down vs IFskina6-2010	0.40228	-2.48583	SGGFPa6-2011 down vs IFskina6-2011
10442184	17015	NM_134199 // Vmn1r235 // vomeronasal 1 receptor 235 // 17 A3.2|17 // 171233 /// ENSMUST	Vmn1r235	NM_134199	0.491372	-2.03512	SGGFPa6-2010 down vs IFskina6-2010	0.438029	-2.28296	SGGFPa6-2011 down vs IFskina6-2011
10386197	10925	NM_144544 // 2210407C18Rik // RIKEN cDNA 2210407C18 gene // 11 B1.3|11 // 78354 /// ENS	2210407C18Rik	NM_144544	0.491335	-2.03527	SGGFPa6-2010 down vs IFskina6-2010	0.225444	-4.43569	SGGFPa6-2011 down vs IFskina6-2011
10538310	27151	NM_007966 // Evx1 // even skipped homeotic gene 1 homolog // 6 B3|6 // 14028 /// ENSMUS	Evx1	NM_007966	0.491152	-2.03603	SGGFPa6-2010 down vs IFskina6-2010	0.436542	-2.29073	SGGFPa6-2011 down vs IFskina6-2011
10362464	8465	NM_020565 // Sult3a1 // sulfotransferase family 3A, member 1 // 10 B1|10 // 57430 /// E	Sult3a1	NM_020565	0.490913	-2.03702	SGGFPa6-2010 down vs IFskina6-2010	0.3828	-2.61233	SGGFPa6-2011 down vs IFskina6-2011
10424064	15076	ENSMUST00000060825 // 4930548G14Rik // RIKEN cDNA 4930548G14 gene // 15 B3.3|15 // 7528	4930548G14Rik	ENSMUST00000060825	0.490828	-2.03737	SGGFPa6-2010 down vs IFskina6-2010	0.301871	-3.31267	SGGFPa6-2011 down vs IFskina6-2011
10548409	28306	NM_001136068 // Klrc1 // killer cell lectin-like receptor subfamily C, member 1 // 6|6	Klrc1	NM_001136068	0.490472	-2.03885	SGGFPa6-2010 down vs IFskina6-2010	0.319698	-3.12795	SGGFPa6-2011 down vs IFskina6-2011
10528872	26181	NM_009170 // Shh // sonic hedgehog // 5 B1|5 16.0 cM // 20423 /// ENSMUST00000002708 //	Shh	NM_009170	0.490289	-2.03961	SGGFPa6-2010 down vs IFskina6-2010	0.467947	-2.13699	SGGFPa6-2011 down vs IFskina6-2011
10480725	21091	BC029214 // BC029214 // cDNA sequence BC029214 // 2 A3|2 // 227622 /// ENSMUST000001142	BC029214	BC029214	0.490272	-2.03969	SGGFPa6-2010 down vs IFskina6-2010	0.496341	-2.01474	SGGFPa6-2011 down vs IFskina6-2011
10442887	17099	NM_001164225 // Fbxl16 // F-box and leucine-rich repeat protein 16 // 17 A3.3|17 // 214	Fbxl16	NM_001164225	0.489748	-2.04187	SGGFPa6-2010 down vs IFskina6-2010	0.408486	-2.44806	SGGFPa6-2011 down vs IFskina6-2011
10508707	24118	ENSMUST00000094666 // Tmem200b // transmembrane protein 200B // 4 D2.3|4 // 623230	Tmem200b	ENSMUST00000094666	0.488525	-2.04698	SGGFPa6-2010 down vs IFskina6-2010	0.397787	-2.51391	SGGFPa6-2011 down vs IFskina6-2011
10575227	31600	NM_019938 // Pmfbp1 // polyamine modulated factor 1 binding protein 1 // 8 D3|8 52.0 cM	Pmfbp1	NM_019938	0.488357	-2.04768	SGGFPa6-2010 down vs IFskina6-2010	0.425817	-2.34843	SGGFPa6-2011 down vs IFskina6-2011
10457787	18636	NM_001081403 // Klhl14 // kelch-like 14 (Drosophila) // 18 A2|18 // 225266 /// ENSMUST0	Klhl14	NM_001081403	0.488054	-2.04895	SGGFPa6-2010 down vs IFskina6-2010	0.391036	-2.55731	SGGFPa6-2011 down vs IFskina6-2011
10536427	26951	NM_026489 // Hormad1 // HORMA domain containing 1 // 3|3 F2 // 67981 /// ENSMUST0000010	Hormad1	NM_026489	0.487825	-2.04991	SGGFPa6-2010 down vs IFskina6-2010	0.250666	-3.98938	SGGFPa6-2011 down vs IFskina6-2011
10452386	18095	BC033350 // 2610034M16Rik // RIKEN cDNA 2610034M16 gene // 17 D|17 // 69239 /// BC03464	2610034M16Rik	BC033350	0.487731	-2.05031	SGGFPa6-2010 down vs IFskina6-2010	0.361819	-2.76381	SGGFPa6-2011 down vs IFskina6-2011
10599927	34299	NM_008032 // Aff2 // AF4/FMR2 family, member 2 // X|X A5 // 14266 /// ENSMUST0000003353	Aff2	NM_008032	0.487731	-2.05031	SGGFPa6-2010 down vs IFskina6-2010	0.431255	-2.31882	SGGFPa6-2011 down vs IFskina6-2011
10373636	9614	NM_146555 // Olfr805 // olfactory receptor 805 // 10 D3|10 // 258548 /// ENSMUST0000007	Olfr805	NM_146555	0.487412	-2.05165	SGGFPa6-2010 down vs IFskina6-2010	0.299061	-3.3438	SGGFPa6-2011 down vs IFskina6-2011
10545638	28016	NM_009392 // Tlx2 // T-cell leukemia, homeobox 2 // 6 C3-D1|6 35.5 cM // 21909 /// ENSM	Tlx2	NM_009392	0.487248	-2.05234	SGGFPa6-2010 down vs IFskina6-2010	0.262018	-3.81653	SGGFPa6-2011 down vs IFskina6-2011
10438060	16525	NM_001190325 // Igll1 // immunoglobulin lambda-like polypeptide 1 // 16|16 9.8 cM // 16	Igll1	NM_001190325	0.487213	-2.05249	SGGFPa6-2010 down vs IFskina6-2010	0.471844	-2.11935	SGGFPa6-2011 down vs IFskina6-2011
10456781	18536	NM_001109743 // Skor2 // SKI family transcriptional corepressor 2 // 18 E3|18 // 664805	Skor2	NM_001109743	0.487148	-2.05276	SGGFPa6-2010 down vs IFskina6-2010	0.478989	-2.08773	SGGFPa6-2011 down vs IFskina6-2011
10551382	28701	NM_175107 // 2310022A10Rik // RIKEN cDNA 2310022A10 gene // 7 A3|7 // 66367 /// NM_0011	2310022A10Rik	NM_175107	0.486772	-2.05435	SGGFPa6-2010 down vs IFskina6-2010	0.344364	-2.9039	SGGFPa6-2011 down vs IFskina6-2011				Cytoskeleton
10492396	22304	NM_019918 // Vmn2r1 // vomeronasal 2, receptor 1 // 3 E1|3 // 56544 /// ENSMUST00000029	Vmn2r1	NM_019918	0.486771	-2.05435	SGGFPa6-2010 down vs IFskina6-2010	0.448063	-2.23183	SGGFPa6-2011 down vs IFskina6-2011
10365469	8786	NM_001163614 // Ascl4 // achaete-scute complex homolog 4 (Drosophila) // 10 C1|10 // 67	Ascl4	NM_001163614	0.485671	-2.05901	SGGFPa6-2010 down vs IFskina6-2010	0.496971	-2.01219	SGGFPa6-2011 down vs IFskina6-2011
10518902	25210	NM_008237 // Hes3 // hairy and enhancer of split 3 (Drosophila) // 4 E2|4 81.5 cM // 15	Hes3	NM_008237	0.485671	-2.05901	SGGFPa6-2010 down vs IFskina6-2010	0.270919	-3.69114	SGGFPa6-2011 down vs IFskina6-2011
10555254	29135	NR_029760 // Mir326 // microRNA 326 // 7|7 // 723840	Mir326	NR_029760	0.485504	-2.05972	SGGFPa6-2010 down vs IFskina6-2010	0.287896	-3.47348	SGGFPa6-2011 down vs IFskina6-2011
10425814	15269	NM_172610 // Mpped1 // metallophosphoesterase domain containing 1 // 15 E2|15 54.5 cM /	Mpped1	NM_172610	0.485432	-2.06002	SGGFPa6-2010 down vs IFskina6-2010	0.427927	-2.33685	SGGFPa6-2011 down vs IFskina6-2011
10545515	28001	NM_001164669 // Dnahc6 // dynein, axonemal, heavy chain 6 // 6 C1|6 31.0 cM // 330355	Dnahc6	NM_001164669	0.485391	-2.0602	SGGFPa6-2010 down vs IFskina6-2010	0.427602	-2.33862	SGGFPa6-2011 down vs IFskina6-2011
10477179	20741	NM_053091 // Cox4i2 // cytochrome c oxidase subunit IV isoform 2 // 2|2 H2 // 84682 ///	Cox4i2	NM_053091	0.485362	-2.06032	SGGFPa6-2010 down vs IFskina6-2010	0.454395	-2.20073	SGGFPa6-2011 down vs IFskina6-2011
10550986	28654	BC049730 // BC049730 // cDNA sequence BC049730 // 7 A3|7 // 232972 /// ENSMUST000000517	BC049730	BC049730	0.485139	-2.06126	SGGFPa6-2010 down vs IFskina6-2010	0.299987	-3.33348	SGGFPa6-2011 down vs IFskina6-2011
10549504	28429	NM_177192 // Dennd5b // DENN/MADD domain containing 5B // 6 G3|6 // 320560 /// ENSMUST0	Dennd5b	NM_177192	0.484802	-2.0627	SGGFPa6-2010 down vs IFskina6-2010	0.499205	-2.00318	SGGFPa6-2011 down vs IFskina6-2011
10538586	27184	NM_134182 // Vmn1r19 // vomeronasal 1 receptor 19 // 6 B3|6 // 171200 /// ENSMUST000000	Vmn1r19	NM_134182	0.484802	-2.0627	SGGFPa6-2010 down vs IFskina6-2010	0.313349	-3.19133	SGGFPa6-2011 down vs IFskina6-2011				Receptor
10476512	20647	NM_011428 // Snap25 // synaptosomal-associated protein 25 // 2 F3|2 78.2 cM // 20614 //	Snap25	NM_011428	0.484769	-2.06284	SGGFPa6-2010 down vs IFskina6-2010	0.427971	-2.33661	SGGFPa6-2011 down vs IFskina6-2011
10436282	16327	NM_174876 // Impg2 // interphotoreceptor matrix proteoglycan 2 // 16 C1.1|16 // 224224	Impg2	NM_174876	0.484753	-2.0629	SGGFPa6-2010 down vs IFskina6-2010	0.42298	-2.36418	SGGFPa6-2011 down vs IFskina6-2011
10380599	10334	NM_172799 // Ttll6 // tubulin tyrosine ligase-like family, member 6 // 11 D|11 55.9 cM	Ttll6	NM_172799	0.484598	-2.06357	SGGFPa6-2010 down vs IFskina6-2010	0.314886	-3.17575	SGGFPa6-2011 down vs IFskina6-2011
10588283	33028	NM_173781 // Rab6b // RAB6B, member RAS oncogene family // 9 F1|9 56.0 cM // 270192 ///	Rab6b	NM_173781	0.484488	-2.06403	SGGFPa6-2010 down vs IFskina6-2010	0.445573	-2.2443	SGGFPa6-2011 down vs IFskina6-2011
10356489	7805	NM_139152 // Asb18 // ankyrin repeat and SOCS box-containing 18 // 1 D|1 // 208372 ///	Asb18	NM_139152	0.484229	-2.06514	SGGFPa6-2010 down vs IFskina6-2010	0.443962	-2.25244	SGGFPa6-2011 down vs IFskina6-2011
10455050	18353	NM_053127 // Pcdhb2 // protocadherin beta 2 // 18 B3|18 // 93873 /// ENSMUST00000056522	Pcdhb2	NM_053127	0.483982	-2.06619	SGGFPa6-2010 down vs IFskina6-2010	0.490209	-2.03995	SGGFPa6-2011 down vs IFskina6-2011
10394060	11654	NM_026907 // Sectm1b // secreted and transmembrane 1B // 11 E2|11 // 58210 /// ENSMUST0	Sectm1b	NM_026907	0.483961	-2.06628	SGGFPa6-2010 down vs IFskina6-2010	0.489261	-2.0439	SGGFPa6-2011 down vs IFskina6-2011
10402608	12604	NM_025488 // 1700001K19Rik // RIKEN cDNA 1700001K19 gene // 12 F1|12 // 66323 /// ENSMU	1700001K19Rik	NM_025488	0.483674	-2.06751	SGGFPa6-2010 down vs IFskina6-2010	0.464741	-2.15174	SGGFPa6-2011 down vs IFskina6-2011
10434559	16156	NM_010143 // Ephb3 // Eph receptor B3 // 16|16 B1-B4 // 13845 /// ENSMUST00000006112 //	Ephb3	NM_010143	0.483501	-2.06825	SGGFPa6-2010 down vs IFskina6-2010	0.380848	-2.62572	SGGFPa6-2011 down vs IFskina6-2011
10419814	14687	NM_199470 // Cdh24 // cadherin-like 24 // 14 C3|14 // 239096 /// ENSMUST00000067784 //	Cdh24	NM_199470	0.48326	-2.06928	SGGFPa6-2010 down vs IFskina6-2010	0.269652	-3.70848	SGGFPa6-2011 down vs IFskina6-2011
10547674	28224	AB024717 // Clec4e // C-type lectin domain family 4, member e // 6 F3|6 59.6 cM // 5661	Clec4e	AB024717	0.483075	-2.07007	SGGFPa6-2010 down vs IFskina6-2010	0.423146	-2.36325	SGGFPa6-2011 down vs IFskina6-2011
10489512	21991	NM_001080550 // Wfdc8 // WAP four-disulfide core domain 8 // 2 H3|2 // 277343 /// ENSMU	Wfdc8	NM_001080550	0.483075	-2.07007	SGGFPa6-2010 down vs IFskina6-2010	0.427561	-2.33885	SGGFPa6-2011 down vs IFskina6-2011
10360540	8250	AK015919 // 4930527J03Rik // RIKEN cDNA 4930527J03 gene // 1 H4|1 // 75164 /// XM_98279	4930527J03Rik	AK015919	0.482974	-2.07051	SGGFPa6-2010 down vs IFskina6-2010	0.338828	-2.95135	SGGFPa6-2011 down vs IFskina6-2011
10501591	23330	NR_015487 // A930005H10Rik // RIKEN cDNA A930005H10 gene // 3 G1|3 // 68161 /// NR_0278	A930005H10Rik	NR_015487	0.482657	-2.07187	SGGFPa6-2010 down vs IFskina6-2010	0.423774	-2.35975	SGGFPa6-2011 down vs IFskina6-2011
10544300	27811	NM_175020 // BC048599 // cDNA sequence BC048599 // 6 B1|6 // 232717 /// ENSMUST00000063	BC048599	NM_175020	0.482583	-2.07218	SGGFPa6-2010 down vs IFskina6-2010	0.271375	-3.68494	SGGFPa6-2011 down vs IFskina6-2011
10472034	20122	NR_033304 // Lypd6 // LY6/PLAUR domain containing 6 // 2 C1.1|2 // 320343 /// NM_177139	Lypd6	NR_033304	0.482059	-2.07444	SGGFPa6-2010 down vs IFskina6-2010	0.432788	-2.3106	SGGFPa6-2011 down vs IFskina6-2011
10459804	18854	NM_027721 // Katnal2 // katanin p60 subunit A-like 2 // 18 E3|18 // 71206 /// ENSMUST00	Katnal2	NM_027721	0.481686	-2.07604	SGGFPa6-2010 down vs IFskina6-2010	0.489261	-2.0439	SGGFPa6-2011 down vs IFskina6-2011
10603620	34749	ENSMUST00000101687 // Gm10489 // predicted gene 10489 // X A1.1|X // 100042912	Gm10489	ENSMUST00000101687	0.481237	-2.07798	SGGFPa6-2010 down vs IFskina6-2010	0.30283	-3.30218	SGGFPa6-2011 down vs IFskina6-2011
10436623	16369	NM_139134 // Chodl // chondrolectin // 16|16 C3.2 // 246048 /// ENSMUST00000023568 // C	Chodl	NM_139134	0.481048	-2.0788	SGGFPa6-2010 down vs IFskina6-2010	0.377213	-2.65102	SGGFPa6-2011 down vs IFskina6-2011
10577219	31791	NM_153093 // AF366264 // cDNA sequence AF366264 // 8 A1.1|8 // 231201 /// ENSMUST000000	AF366264	NM_153093	0.480864	-2.07959	SGGFPa6-2010 down vs IFskina6-2010	0.310386	-3.22179	SGGFPa6-2011 down vs IFskina6-2011				Cytoskeleton
10593756	33580	NM_145129 // Chrna3 // cholinergic receptor, nicotinic, alpha polypeptide 3 // 9 B|9 //	Chrna3	NM_145129	0.480821	-2.07978	SGGFPa6-2010 down vs IFskina6-2010	0.330219	-3.0283	SGGFPa6-2011 down vs IFskina6-2011
10430436	15771	ENSMUST00000100464 // Gm10865 // predicted gene 10865 // --- // 100038602	Gm10865	ENSMUST00000100464	0.480651	-2.08051	SGGFPa6-2010 down vs IFskina6-2010	0.413812	-2.41656	SGGFPa6-2011 down vs IFskina6-2011
10476108	20608	NM_001110513 // Ebf4 // early B-cell factor 4 // 2 F1|2 // 228598 /// ENSMUST0000011028	Ebf4	NM_001110513	0.480619	-2.08065	SGGFPa6-2010 down vs IFskina6-2010	0.321954	-3.10604	SGGFPa6-2011 down vs IFskina6-2011
10363741	8603	ENSMUST00000099661 // Gm10797 // predicted gene 10797 // --- // 100038508	Gm10797	ENSMUST00000099661	0.480619	-2.08065	SGGFPa6-2010 down vs IFskina6-2010	0.428443	-2.33403	SGGFPa6-2011 down vs IFskina6-2011
10445053	17292	NM_146077 // Trim31 // tripartite motif-containing 31 // 17 B1|17 // 224762 /// ENSMUST	Trim31	NM_146077	0.480604	-2.08072	SGGFPa6-2010 down vs IFskina6-2010	0.482173	-2.07394	SGGFPa6-2011 down vs IFskina6-2011
10361754	8360	NM_010146 // Epm2a // epilepsy, progressive myoclonic epilepsy, type 2 gene alpha // 10	Epm2a	NM_010146	0.480324	-2.08193	SGGFPa6-2010 down vs IFskina6-2010	0.482466	-2.07269	SGGFPa6-2011 down vs IFskina6-2011
10445187	17328	NM_001038500 // Gm6084 // predicted gene 6084 // 17 B2|17 // 619517 /// ENSMUST00000097	Gm6084	NM_001038500	0.480073	-2.08302	SGGFPa6-2010 down vs IFskina6-2010	0.332915	-3.00377	SGGFPa6-2011 down vs IFskina6-2011
10602749	34648	NR_033598 // 4930503H13Rik // RIKEN cDNA 4930503H13 gene // X F4|X // 74941	4930503H13Rik	NR_033598	0.479492	-2.08554	SGGFPa6-2010 down vs IFskina6-2010	0.341408	-2.92905	SGGFPa6-2011 down vs IFskina6-2011
10409602	13492	NM_012035 // Trpc7 // transient receptor potential cation channel, subfamily C, member	Trpc7	NM_012035	0.4793	-2.08638	SGGFPa6-2010 down vs IFskina6-2010	0.471559	-2.12062	SGGFPa6-2011 down vs IFskina6-2011
10351310	7282	NM_173029 // Adcy10 // adenylate cyclase 10 // 1 H2.3|1 // 271639 /// ENSMUST0000002785	Adcy10	NM_173029	0.479261	-2.08654	SGGFPa6-2010 down vs IFskina6-2010	0.370298	-2.70053	SGGFPa6-2011 down vs IFskina6-2011
10496192	22708	NM_021382 // Tacr3 // tachykinin receptor 3 // 3|3 H2 // 21338 /// ENSMUST00000029822 /	Tacr3	NM_021382	0.479239	-2.08664	SGGFPa6-2010 down vs IFskina6-2010	0.228169	-4.38273	SGGFPa6-2011 down vs IFskina6-2011
10484610	21431	NR_033507 // Olfr1077-ps1 // olfactory receptor 1077, pseudogene 1 // 2 D|2 // 625853 /	Olfr1077-ps1	NR_033507	0.479094	-2.08727	SGGFPa6-2010 down vs IFskina6-2010	0.371157	-2.69428	SGGFPa6-2011 down vs IFskina6-2011
10544763	27872	NM_008265 // Hoxa4 // homeobox A4 // 6 B3|6 26.3 cM // 15401 /// ENSMUST00000101395 //	Hoxa4	NM_008265	0.479065	-2.0874	SGGFPa6-2010 down vs IFskina6-2010	0.326295	-3.06471	SGGFPa6-2011 down vs IFskina6-2011
10364583	8704	NM_130455 // Grin3b // glutamate receptor, ionotropic, NMDA3B // 10 C1|10 // 170483 ///	Grin3b	NM_130455	0.478793	-2.08858	SGGFPa6-2010 down vs IFskina6-2010	0.441941	-2.26275	SGGFPa6-2011 down vs IFskina6-2011
10414778	14078	ENSMUST00000103659 // Gm13927 // predicted gene 13927 // 14 C2|14 // 667567 /// ENSMUST	Gm13927	ENSMUST00000103659	0.478637	-2.08926	SGGFPa6-2010 down vs IFskina6-2010	0.38589	-2.59141	SGGFPa6-2011 down vs IFskina6-2011
10430190	15744	NM_177820 // Apol10b // apolipoprotein L 10b // 15 E1|15 // 328561 /// NM_001143686 //	Apol10b	NM_177820	0.478378	-2.0904	SGGFPa6-2010 down vs IFskina6-2010	0.42141	-2.37299	SGGFPa6-2011 down vs IFskina6-2011
10529068	26202	NM_011773 // Slc30a3 // solute carrier family 30 (zinc transporter), member 3 // 5 B1|5	Slc30a3	NM_011773	0.478156	-2.09137	SGGFPa6-2010 down vs IFskina6-2010	0.456014	-2.19291	SGGFPa6-2011 down vs IFskina6-2011
10548047	28269	NM_010595 // Kcna1 // potassium voltage-gated channel, shaker-related subfamily, member	Kcna1	NM_010595	0.478094	-2.09164	SGGFPa6-2010 down vs IFskina6-2010	0.444171	-2.25139	SGGFPa6-2011 down vs IFskina6-2011
10370603	9319	NM_001033473 // Odf3l2 // outer dense fiber of sperm tails 3-like 2 // 10 C1|10 // 3823	Odf3l2	NM_001033473	0.477728	-2.09324	SGGFPa6-2010 down vs IFskina6-2010	0.439804	-2.27374	SGGFPa6-2011 down vs IFskina6-2011
10588043	33004	NM_009034 // Rbp2 // retinol binding protein 2, cellular // 9 E3.3|9 57.0 cM // 19660 /	Rbp2	NM_009034	0.477512	-2.09419	SGGFPa6-2010 down vs IFskina6-2010	0.447196	-2.23616	SGGFPa6-2011 down vs IFskina6-2011
10496971	22780	NM_025758 // Asb17 // ankyrin repeat and SOCS box-containing 17 // 3 H3|3 // 66772 ///	Asb17	NM_025758	0.477457	-2.09443	SGGFPa6-2010 down vs IFskina6-2010	0.456639	-2.18991	SGGFPa6-2011 down vs IFskina6-2011
10491753	22237	NM_175515 // Intu // inturned planar cell polarity effector homolog (Drosophila) // 3 B	Intu	NM_175515	0.477255	-2.09532	SGGFPa6-2010 down vs IFskina6-2010	0.496837	-2.01273	SGGFPa6-2011 down vs IFskina6-2011
10367471	8977	NM_146861 // Olfr9 // olfactory receptor 9 // 10 D3|10 // 18373 /// ENSMUST00000091996	Olfr9	NM_146861	0.477097	-2.09601	SGGFPa6-2010 down vs IFskina6-2010	0.432458	-2.31236	SGGFPa6-2011 down vs IFskina6-2011
10462084	19130	NR_029591 // Mir204 // microRNA 204 // 19|19 // 387200	Mir204	NR_029591	0.47697	-2.09657	SGGFPa6-2010 down vs IFskina6-2010	0.368146	-2.71631	SGGFPa6-2011 down vs IFskina6-2011
10388302	11123	NM_146711 // Olfr43 // olfactory receptor 43 // 11 B4|11 // 258706 /// ENSMUST000000789	Olfr43	NM_146711	0.476668	-2.09789	SGGFPa6-2010 down vs IFskina6-2010	0.209536	-4.77245	SGGFPa6-2011 down vs IFskina6-2011
10581327	32233	BC052498 // E130303B06Rik // RIKEN cDNA E130303B06 gene // 8 D3|8 // 102124 /// ENSMUST	E130303B06Rik	BC052498	0.476624	-2.09809	SGGFPa6-2010 down vs IFskina6-2010	0.455512	-2.19533	SGGFPa6-2011 down vs IFskina6-2011
10607425	35274	NM_001037167 // Gm5647 // predicted gene 5647 // X F3|X // 434881 /// ENSMUST0000010113	Gm5647	NM_001037167	0.475664	-2.10233	SGGFPa6-2010 down vs IFskina6-2010	0.274883	-3.63791	SGGFPa6-2011 down vs IFskina6-2011
10353252	7492	NM_001033288 // Gm106 // predicted gene 106 // 1 A3|1 // 226866 /// ENSMUST00000040695	Gm106	NM_001033288	0.47561	-2.10256	SGGFPa6-2010 down vs IFskina6-2010	0.353626	-2.82785	SGGFPa6-2011 down vs IFskina6-2011
10358210	7960	NM_030676 // Nr5a2 // nuclear receptor subfamily 5, group A, member 2 // 1 E4|1 78.0 cM	Nr5a2	NM_030676	0.47561	-2.10256	SGGFPa6-2010 down vs IFskina6-2010	0.35511	-2.81603	SGGFPa6-2011 down vs IFskina6-2011
10608156	35358	NM_148943 // Usp9y // ubiquitin specific peptidase 9, Y chromosome // Y A1|Y // 107868	Usp9y	NM_148943	0.475214	-2.10432	SGGFPa6-2010 down vs IFskina6-2010	0.228907	-4.36859	SGGFPa6-2011 down vs IFskina6-2011
10348166	6980	NM_009604 // Chrng // cholinergic receptor, nicotinic, gamma polypeptide // 1 D|1 52.3	Chrng	NM_009604	0.475212	-2.10433	SGGFPa6-2010 down vs IFskina6-2010	0.4153	-2.4079	SGGFPa6-2011 down vs IFskina6-2011
10515007	24789	NM_024198 // Gpx7 // glutathione peroxidase 7 // 4 C7|4 // 67305 /// ENSMUST00000030332	Gpx7	NM_024198	0.475126	-2.1047	SGGFPa6-2010 down vs IFskina6-2010	0.464797	-2.15148	SGGFPa6-2011 down vs IFskina6-2011
10403917	12740	NM_146533 // Olfr1367 // olfactory receptor 1367 // 13 A3-A4|13 // 258526 /// ENSMUST00	Olfr1367	NM_146533	0.474576	-2.10714	SGGFPa6-2010 down vs IFskina6-2010	0.29038	-3.44377	SGGFPa6-2011 down vs IFskina6-2011
10560139	29707	NM_001039146 // Vmn1r90 // vomeronasal 1 receptor 90 // 7 A1|7 // 627280 /// ENSMUST000	Vmn1r90	NM_001039146	0.474576	-2.10714	SGGFPa6-2010 down vs IFskina6-2010	0.391694	-2.55301	SGGFPa6-2011 down vs IFskina6-2011
10539921	27343	NM_175017 // 4933427D06Rik // RIKEN cDNA 4933427D06 gene // 6 D1|6 // 232217 /// ENSMUS	4933427D06Rik	NM_175017	0.474573	-2.10716	SGGFPa6-2010 down vs IFskina6-2010	0.493213	-2.02752	SGGFPa6-2011 down vs IFskina6-2011
10348570	7009	NM_001033292 // Espnl // espin-like // 1 D|1 // 227357 /// ENSMUST00000088904 // Espnl	Espnl	NM_001033292	0.474499	-2.10749	SGGFPa6-2010 down vs IFskina6-2010	0.462709	-2.16118	SGGFPa6-2011 down vs IFskina6-2011
10544801	27879	NM_010450 // Hoxa11 // homeobox A11 // 6 B3|6 26.33 cM // 15396 /// ENSMUST00000048026	Hoxa11	NM_010450	0.474023	-2.1096	SGGFPa6-2010 down vs IFskina6-2010	0.440855	-2.26832	SGGFPa6-2011 down vs IFskina6-2011
10606548	35155	NM_153109 // Tgif2lx1 // TGFB-induced factor homeobox 2-like, X-linked 1 // X E1|X // 2	Tgif2lx1	NM_153109	0.47398	-2.10979	SGGFPa6-2010 down vs IFskina6-2010	0.354864	-2.81798	SGGFPa6-2011 down vs IFskina6-2011
10406519	13089	NM_013500 // Hapln1 // hyaluronan and proteoglycan link protein 1 // 13 C3|13 44.0 cM /	Hapln1	NM_013500	0.473238	-2.1131	SGGFPa6-2010 down vs IFskina6-2010	0.429072	-2.33061	SGGFPa6-2011 down vs IFskina6-2011
10531073	26399	NM_133894 // Ugt2b38 // UDP glucuronosyltransferase 2 family, polypeptide B38 // 5 E1|5	Ugt2b38	NM_133894	0.473127	-2.1136	SGGFPa6-2010 down vs IFskina6-2010	0.357406	-2.79794	SGGFPa6-2011 down vs IFskina6-2011
10541480	27492	NR_027619 // Mug-ps1 // murinoglobulin, pseudogene 1 // 6 F1|6 // 17835 /// NM_008645 /	Mug-ps1	NR_027619	0.473024	-2.11406	SGGFPa6-2010 down vs IFskina6-2010	0.387768	-2.57886	SGGFPa6-2011 down vs IFskina6-2011
10460746	18966	NM_001009546 // Naaladl1 // N-acetylated alpha-linked acidic dipeptidase-like 1 // 19 A	Naaladl1	NM_001009546	0.472958	-2.11435	SGGFPa6-2010 down vs IFskina6-2010	0.487543	-2.0511	SGGFPa6-2011 down vs IFskina6-2011
10485798	21658	NM_001011787 // Olfr1307 // olfactory receptor 1307 // 2 E3|2 // 257956 /// ENSMUST0000	Olfr1307	NM_001011787	0.472718	-2.11542	SGGFPa6-2010 down vs IFskina6-2010	0.402508	-2.48442	SGGFPa6-2011 down vs IFskina6-2011
10485307	21588	NR_029752 // Mir129-2 // microRNA 129-2 // 2|2 // 723953	Mir129-2	NR_029752	0.472561	-2.11613	SGGFPa6-2010 down vs IFskina6-2010	0.316449	-3.16007	SGGFPa6-2011 down vs IFskina6-2011
10554778	29088	NM_001143834 // Grm5 // glutamate receptor, metabotropic 5 // 7 E1|7 // 108071 /// NM_0	Grm5	NM_001143834	0.472135	-2.11804	SGGFPa6-2010 down vs IFskina6-2010	0.406429	-2.46046	SGGFPa6-2011 down vs IFskina6-2011
10511886	24440	NM_016668 // Bhmt // betaine-homocysteine methyltransferase // 13 D1|13 // 12116 /// NM	Bhmt	NM_016668	0.471391	-2.12138	SGGFPa6-2010 down vs IFskina6-2010	0.430147	-2.32479	SGGFPa6-2011 down vs IFskina6-2011
10393064	11573	NM_001009573 // Unc13d // unc-13 homolog D (C. elegans) // 11 E2|11 // 70450 /// ENSMUS	Unc13d	NM_001009573	0.471391	-2.12138	SGGFPa6-2010 down vs IFskina6-2010	0.49621	-2.01528	SGGFPa6-2011 down vs IFskina6-2011
10517568	25077	NM_001126318 // Gm13011 // predicted gene 13011 // 4 D3|4 // 242711	Gm13011	NM_001126318	0.471387	-2.1214	SGGFPa6-2010 down vs IFskina6-2010	0.413812	-2.41656	SGGFPa6-2011 down vs IFskina6-2011
10535972	26890	ENSMUST00000067770 // D730045B01Rik // RIKEN cDNA D730045B01 gene // 5 G3|5 // 77867	D730045B01Rik	ENSMUST00000067770	0.47129	-2.12184	SGGFPa6-2010 down vs IFskina6-2010	0.410118	-2.43832	SGGFPa6-2011 down vs IFskina6-2011
10493999	22490	NM_001007222 // Tdpoz2 // TD and POZ domain containing 2 // 3 F2.1|3 // 399673 /// BC14	Tdpoz2	NM_001007222	0.47111	-2.12265	SGGFPa6-2010 down vs IFskina6-2010	0.335277	-2.98261	SGGFPa6-2011 down vs IFskina6-2011
10550476	28576	NM_026087 // Ceacam12 // carcinoembryonic antigen-related cell adhesion molecule 12 //	Ceacam12	NM_026087	0.470972	-2.12327	SGGFPa6-2010 down vs IFskina6-2010	0.40228	-2.48583	SGGFPa6-2011 down vs IFskina6-2011
10345181	6701	XM_003086143 // Gm6462 // predicted gene 6462 // 1 A5|1 // 623924	Gm6462	XM_003086143	0.470972	-2.12327	SGGFPa6-2010 down vs IFskina6-2010	0.484444	-2.06422	SGGFPa6-2011 down vs IFskina6-2011
10565385	30422	NM_146621 // Olfr308 // olfactory receptor 308 // 7 E1|7 // 258614 /// ENSMUST000000442	Olfr308	NM_146621	0.470972	-2.12327	SGGFPa6-2010 down vs IFskina6-2010	0.484444	-2.06422	SGGFPa6-2011 down vs IFskina6-2011
10345089	6693	NR_029717 // Mir30c-2 // microRNA 30c-2 // 1|1 // 723964	Mir30c-2	NR_029717	0.470472	-2.12552	SGGFPa6-2010 down vs IFskina6-2010	0.489261	-2.0439	SGGFPa6-2011 down vs IFskina6-2011
10600947	34430	NM_001081283 // Tmem28 // transmembrane protein 28 // X C3|X // 620592	Tmem28	NM_001081283	0.470056	-2.1274	SGGFPa6-2010 down vs IFskina6-2010	0.432323	-2.31309	SGGFPa6-2011 down vs IFskina6-2011
10469108	19825	NR_033470 // Gm10857 // predicted gene 10857 // 2|2 // 100038358 /// NR_033471 // Gm108	Gm10857	NR_033470	0.47001	-2.12762	SGGFPa6-2010 down vs IFskina6-2010	0.448063	-2.23183	SGGFPa6-2011 down vs IFskina6-2011
10435251	16226	NM_134251 // Slc12a8 // solute carrier family 12 (potassium/chloride transporters), mem	Slc12a8	NM_134251	0.469963	-2.12783	SGGFPa6-2010 down vs IFskina6-2010	0.432372	-2.31282	SGGFPa6-2011 down vs IFskina6-2011
10483851	21347	NM_009989 // Cyct // cytochrome c, testis // 2 C3|2 47.0 cM // 13067 /// ENSMUST0000002	Cyct	NM_009989	0.469946	-2.1279	SGGFPa6-2010 down vs IFskina6-2010	0.40228	-2.48583	SGGFPa6-2011 down vs IFskina6-2011
10520946	25412	NM_001081407 // Plb1 // phospholipase B1 // 5 B1|5 // 665270 /// ENSMUST00000101376 //	Plb1	NM_001081407	0.469946	-2.1279	SGGFPa6-2010 down vs IFskina6-2010	0.29694	-3.36768	SGGFPa6-2011 down vs IFskina6-2011
10498002	22914	NR_003617 // 1700018B24Rik // enhancer of rudimentary homolog pseudogene // 3 C|3 // 66	1700018B24Rik	NR_003617	0.469845	-2.12836	SGGFPa6-2010 down vs IFskina6-2010	0.423217	-2.36285	SGGFPa6-2011 down vs IFskina6-2011
10355763	7738	NM_001003917 // Atg9a // autophagy-related 9A (yeast) // 1 C3|1 // 245860 /// ENSMUST00	Atg9a	NM_001003917	0.469775	-2.12868	SGGFPa6-2010 down vs IFskina6-2010	0.372391	-2.68535	SGGFPa6-2011 down vs IFskina6-2011
10474499	20461	NM_146400 // Olfr1288 // olfactory receptor 1288 // 2 E5|2 // 258395 /// ENSMUST0000010	Olfr1288	NM_146400	0.469756	-2.12876	SGGFPa6-2010 down vs IFskina6-2010	0.473592	-2.11152	SGGFPa6-2011 down vs IFskina6-2011
10537007	27004	NM_029373 // 1700025E21Rik // RIKEN cDNA 1700025E21 gene // 6 A3.3|6 // 75647 /// NM_02	1700025E21Rik	NM_029373	0.469631	-2.12933	SGGFPa6-2010 down vs IFskina6-2010	0.483388	-2.06873	SGGFPa6-2011 down vs IFskina6-2011
10489444	21979	NM_138685 // Wfdc15b // WAP four-disulfide core domain 15B // 2 H3|2 // 192201 /// NM_0	Wfdc15b	NM_138685	0.469535	-2.12976	SGGFPa6-2010 down vs IFskina6-2010	0.321326	-3.1121	SGGFPa6-2011 down vs IFskina6-2011
10388389	11131	NM_010430 // Hic1 // hypermethylated in cancer 1 // 11 B5|11 47.65 cM // 15248 /// NM_0	Hic1	NM_010430	0.469159	-2.13147	SGGFPa6-2010 down vs IFskina6-2010	0.247111	-4.04677	SGGFPa6-2011 down vs IFskina6-2011
10421577	14850	ENSMUST00000059032 // Gm9779 // predicted gene 9779 // 14|14 // 638575	Gm9779	ENSMUST00000059032	0.469103	-2.13173	SGGFPa6-2010 down vs IFskina6-2010	0.420699	-2.377	SGGFPa6-2011 down vs IFskina6-2011
10488678	21897	NM_001159376 // Dusp15 // dual specificity phosphatase-like 15 // 2 H1|2 // 252864 ///	Dusp15	NM_001159376	0.469021	-2.1321	SGGFPa6-2010 down vs IFskina6-2010	0.336266	-2.97384	SGGFPa6-2011 down vs IFskina6-2011
10385824	10879	ENSMUST00000057722 // Gm9837 // predicted gene 9837 // 11 B1.3|11 // 432561	Gm9837	ENSMUST00000057722	0.46897	-2.13233	SGGFPa6-2010 down vs IFskina6-2010	0.42142	-2.37293	SGGFPa6-2011 down vs IFskina6-2011
10373600	9597	NM_027853 // Mettl7b // methyltransferase like 7B // 10 D3|10 // 71664 /// ENSMUST00000	Mettl7b	NM_027853	0.468723	-2.13345	SGGFPa6-2010 down vs IFskina6-2010	0.286197	-3.49409	SGGFPa6-2011 down vs IFskina6-2011
10604403	34861	NM_019680 // Elf4 // E74-like factor 4 (ets domain transcription factor) // X A3.2|X //	Elf4	NM_019680	0.468624	-2.13391	SGGFPa6-2010 down vs IFskina6-2010	0.42142	-2.37293	SGGFPa6-2011 down vs IFskina6-2011
10417561	14440	NM_183187 // Fam107a // family with sequence similarity 107, member A // 14 A1|14 // 26	Fam107a	NM_183187	0.468209	-2.1358	SGGFPa6-2010 down vs IFskina6-2010	0.433193	-2.30844	SGGFPa6-2011 down vs IFskina6-2011
10362147	8409	NM_053205 // Taar1 // trace amine-associated receptor 1 // 10|10 A3 // 111174 /// ENSMU	Taar1	NM_053205	0.468183	-2.13592	SGGFPa6-2010 down vs IFskina6-2010	0.477608	-2.09377	SGGFPa6-2011 down vs IFskina6-2011
10478133	20826	NM_175419 // Actr5 // ARP5 actin-related protein 5 homolog (yeast) // 2 H1|2 // 109275	Actr5	NM_175419	0.46799	-2.1368	SGGFPa6-2010 down vs IFskina6-2010	0.347453	-2.87809	SGGFPa6-2011 down vs IFskina6-2011
10426284	15311	NM_013455 // Acr // acrosin prepropeptide // 15 E-F|15 48.6 cM // 11434 /// ENSMUST0000	Acr	NM_013455	0.467843	-2.13747	SGGFPa6-2010 down vs IFskina6-2010	0.440829	-2.26845	SGGFPa6-2011 down vs IFskina6-2011
10461583	19045	NM_009962 // Gpr44 // G protein-coupled receptor 44 // 19 A|19 // 14764 /// NM_023731 /	Gpr44	NM_009962	0.467763	-2.13784	SGGFPa6-2010 down vs IFskina6-2010	0.391271	-2.55577	SGGFPa6-2011 down vs IFskina6-2011
10556031	29257	NM_001011749 // Olfr704 // olfactory receptor 704 // 7 E3|7 // 257902 /// ENSMUST000000	Olfr704	NM_001011749	0.467734	-2.13797	SGGFPa6-2010 down vs IFskina6-2010	0.186288	-5.36802	SGGFPa6-2011 down vs IFskina6-2011
10536722	26978	NM_029848 // Hyal4 // hyaluronoglucosaminidase 4 // 6|6 A3 // 77042 /// ENSMUST00000031	Hyal4	NM_029848	0.46702	-2.14124	SGGFPa6-2010 down vs IFskina6-2010	0.403278	-2.47968	SGGFPa6-2011 down vs IFskina6-2011
10571739	31240	NM_172407 // Cdkn2aip // CDKN2A interacting protein // 8 B1.1|8 // 70925 /// ENSMUST000	Cdkn2aip	NM_172407	0.466798	-2.14226	SGGFPa6-2010 down vs IFskina6-2010	0.459243	-2.1775	SGGFPa6-2011 down vs IFskina6-2011
10345877	6769	ENSMUST00000066196 // Gm9915 // predicted gene 9915 // --- // 791306	Gm9915	ENSMUST00000066196	0.466718	-2.14262	SGGFPa6-2010 down vs IFskina6-2010	0.370787	-2.69696	SGGFPa6-2011 down vs IFskina6-2011
10369920	9268	NM_198860 // AI646023 // expressed sequence AI646023 // 10 C1|10 // 192734 /// ENSMUST0	AI646023	NM_198860	0.46648	-2.14372	SGGFPa6-2010 down vs IFskina6-2010	0.454623	-2.19962	SGGFPa6-2011 down vs IFskina6-2011
10568233	30840	NM_030226 // 9130019O22Rik // RIKEN cDNA 9130019O22 gene // 7 F3|7 // 78921 /// ENSMUST	9130019O22Rik	NM_030226	0.466303	-2.14453	SGGFPa6-2010 down vs IFskina6-2010	0.391271	-2.55577	SGGFPa6-2011 down vs IFskina6-2011
10426656	15355	NM_013639 // Prph // peripherin // 15 E-F|15 55.5 cM // 19132 /// NM_001163588 // Prph	Prph	NM_013639	0.466043	-2.14572	SGGFPa6-2010 down vs IFskina6-2010	0.444062	-2.25194	SGGFPa6-2011 down vs IFskina6-2011
10384335	10710	NM_177576 // Sun3 // Sad1 and UNC84 domain containing 3 // 11 A1|11 // 194974 /// ENSMU	Sun3	NM_177576	0.465563	-2.14794	SGGFPa6-2010 down vs IFskina6-2010	0.340424	-2.93751	SGGFPa6-2011 down vs IFskina6-2011
10548612	28334	NM_020501 // Tas2r105 // taste receptor, type 2, member 105 // 6 F3|6 62.0 cM // 57252	Tas2r105	NM_020501	0.465016	-2.15047	SGGFPa6-2010 down vs IFskina6-2010	0.285312	-3.50493	SGGFPa6-2011 down vs IFskina6-2011
10550459	28573	ENSMUST00000108490 // Gm5155 // predicted gene 5155 // 7 A2|7 // 381852	Gm5155	ENSMUST00000108490	0.46465	-2.15216	SGGFPa6-2010 down vs IFskina6-2010	0.308708	-3.23931	SGGFPa6-2011 down vs IFskina6-2011
10547765	28239	NR_029554 // Mir141 // microRNA 141 // 6|6 // 387159	Mir141	NR_029554	0.46465	-2.15216	SGGFPa6-2010 down vs IFskina6-2010	0.466377	-2.14419	SGGFPa6-2011 down vs IFskina6-2011
10490467	22088	NM_145851 // Cables2 // CDK5 and Abl enzyme substrate 2 // 2 H4|2 // 252966 /// ENSMUST	Cables2	NM_145851	0.464609	-2.15235	SGGFPa6-2010 down vs IFskina6-2010	0.455013	-2.19774	SGGFPa6-2011 down vs IFskina6-2011
10440651	16844	NM_001163141 // Krtap24-1 // keratin associated protein 24-1 // 16 C3.3|16 // 239932 //	Krtap24-1	NM_001163141	0.464588	-2.15244	SGGFPa6-2010 down vs IFskina6-2010	0.411142	-2.43225	SGGFPa6-2011 down vs IFskina6-2011
10458016	18665	NM_001042768 // Proc // protein C // 18|18 B3 // 19123 /// NM_008934 // Proc // protein	Proc	NM_001042768	0.464474	-2.15297	SGGFPa6-2010 down vs IFskina6-2010	0.271235	-3.68684	SGGFPa6-2011 down vs IFskina6-2011
10563802	30125	BC082541 // Dbx1 // developing brain homeobox 1 // 7 B5|7 22.8 cM // 13172	Dbx1	BC082541	0.464214	-2.15418	SGGFPa6-2010 down vs IFskina6-2010	0.421414	-2.37296	SGGFPa6-2011 down vs IFskina6-2011
10406676	13107	NM_172589 // Lhfpl2 // lipoma HMGIC fusion partner-like 2 // 13 D1|13 // 218454 /// BC0	Lhfpl2	NM_172589	0.464059	-2.1549	SGGFPa6-2010 down vs IFskina6-2010	0.319423	-3.13065	SGGFPa6-2011 down vs IFskina6-2011
10570761	31138	NM_026459 // Ccdc70 // coiled-coil domain containing 70 // 8|8 A3 // 67929 /// ENSMUST0	Ccdc70	NM_026459	0.464047	-2.15495	SGGFPa6-2010 down vs IFskina6-2010	0.309667	-3.22927	SGGFPa6-2011 down vs IFskina6-2011
10412155	13758	NM_001145885 // Ddx4 // DEAD (Asp-Glu-Ala-Asp) box polypeptide 4 // 13 D2.2|13 67.0 cM	Ddx4	NM_001145885	0.464047	-2.15495	SGGFPa6-2010 down vs IFskina6-2010	0.40228	-2.48583	SGGFPa6-2011 down vs IFskina6-2011
10607888	35331	NM_001033330 // Frmpd4 // FERM and PDZ domain containing 4 // X F5|X // 333605 /// ENSM	Frmpd4	NM_001033330	0.463785	-2.15617	SGGFPa6-2010 down vs IFskina6-2010	0.414915	-2.41013	SGGFPa6-2011 down vs IFskina6-2011
10421517	14842	NM_133720 // Cysltr2 // cysteinyl leukotriene receptor 2 // 14 D3|14 // 70086 /// NM_00	Cysltr2	NM_133720	0.463729	-2.15643	SGGFPa6-2010 down vs IFskina6-2010	0.304048	-3.28896	SGGFPa6-2011 down vs IFskina6-2011
10556059	29264	NM_029660 // Rbmxl2 // RNA binding motif protein, X-linked-like 2 // 7 E3|7 // 76572 //	Rbmxl2	NM_029660	0.463688	-2.15662	SGGFPa6-2010 down vs IFskina6-2010	0.364423	-2.74406	SGGFPa6-2011 down vs IFskina6-2011
10568298	30853	NM_024414 // Stx1b // syntaxin 1B // 7 F3|7 // 56216 /// ENSMUST00000106267 // Stx1b //	Stx1b	NM_024414	0.46361	-2.15698	SGGFPa6-2010 down vs IFskina6-2010	0.343122	-2.91441	SGGFPa6-2011 down vs IFskina6-2011
10441530	16935	NM_031395 // Sytl3 // synaptotagmin-like 3 // 17|17 A1 // 83672 /// NM_183368 // Sytl3	Sytl3	NM_031395	0.463288	-2.15849	SGGFPa6-2010 down vs IFskina6-2010	0.377347	-2.65008	SGGFPa6-2011 down vs IFskina6-2011
10509168	24172	NM_177733 // E2f2 // E2F transcription factor 2 // 4 D3|4 // 242705 /// ENSMUST00000061	E2f2	NM_177733	0.463203	-2.15888	SGGFPa6-2010 down vs IFskina6-2010	0.446281	-2.24074	SGGFPa6-2011 down vs IFskina6-2011
10599637	34254	NM_028671 // Fam122c // family with sequence similarity 122, member C // X A5|X // 7386	Fam122c	NM_028671	0.46315	-2.15913	SGGFPa6-2010 down vs IFskina6-2010	0.431101	-2.31964	SGGFPa6-2011 down vs IFskina6-2011				Apoptosis
10603768	34768	NM_028916 // Efhc2 // EF-hand domain (C-terminal) containing 2 // X|X A1.3 // 74405 ///	Efhc2	NM_028916	0.462918	-2.16021	SGGFPa6-2010 down vs IFskina6-2010	0.361925	-2.763	SGGFPa6-2011 down vs IFskina6-2011				Cell Junction
10532997	26622	ENSMUST00000078701 // 4930430O22Rik // RIKEN cDNA 4930430O22 gene // 5|5 // 78154	4930430O22Rik	ENSMUST00000078701	0.462618	-2.16161	SGGFPa6-2010 down vs IFskina6-2010	0.441353	-2.26576	SGGFPa6-2011 down vs IFskina6-2011				Receptor
10457378	18595	ENSMUST00000070164 // Gm9993 // predicted gene 9993 // --- // 791280	Gm9993	ENSMUST00000070164	0.46258	-2.16179	SGGFPa6-2010 down vs IFskina6-2010	0.494114	-2.02382	SGGFPa6-2011 down vs IFskina6-2011
10553071	28925	NM_001033356 // Ntn5 // netrin 5 // 7 B4|7 // 243967 /// ENSMUST00000107742 // Ntn5 //	Ntn5	NM_001033356	0.46258	-2.16179	SGGFPa6-2010 down vs IFskina6-2010	0.46784	-2.13748	SGGFPa6-2011 down vs IFskina6-2011
10366144	8845	NM_001162369 // Mgat4c // mannosyl (alpha-1,3-)-glycoprotein beta-1,4-N-acetylglucosami	Mgat4c	NM_001162369	0.462336	-2.16293	SGGFPa6-2010 down vs IFskina6-2010	0.411918	-2.42767	SGGFPa6-2011 down vs IFskina6-2011
10425721	15255	NR_029804 // Mir33 // microRNA 33 // 15|15 // 723897	Mir33	NR_029804	0.461861	-2.16515	SGGFPa6-2010 down vs IFskina6-2010	0.430627	-2.32219	SGGFPa6-2011 down vs IFskina6-2011
10471745	20079	NM_146948 // Olfr342 // olfactory receptor 342 // 2 C1|2 // 258950 /// ENSMUST000000741	Olfr342	NM_146948	0.46151	-2.1668	SGGFPa6-2010 down vs IFskina6-2010	0.402359	-2.48534	SGGFPa6-2011 down vs IFskina6-2011				Txn Regulation
10412729	13823	NM_177624 // Sntn // sentan, cilia apical structure protein // 14 A1|14 // 218739 /// E	Sntn	NM_177624	0.46151	-2.1668	SGGFPa6-2010 down vs IFskina6-2010	0.499205	-2.00318	SGGFPa6-2011 down vs IFskina6-2011				Ion Transport/Receptor
10408225	13319	NM_178208 // Hist1h4c // histone cluster 1, H4c // 13 A2-A3|13 // 319155 /// NM_178208	Hist1h4c	NM_178208	0.461494	-2.16687	SGGFPa6-2010 down vs IFskina6-2010	0.453423	-2.20545	SGGFPa6-2011 down vs IFskina6-2011				Receptor
10488965	21926	NM_001136556 // Fer1l4 // fer-1-like 4 (C. elegans) // 2|2 H2 // 74562	Fer1l4	NM_001136556	0.460609	-2.17104	SGGFPa6-2010 down vs IFskina6-2010	0.43689	-2.28891	SGGFPa6-2011 down vs IFskina6-2011
10560294	29724	NM_175315 // Ceacam15 // carcinoembryonic antigen-related cell adhesion molecule 15 //	Ceacam15	NM_175315	0.460499	-2.17156	SGGFPa6-2010 down vs IFskina6-2010	0.444269	-2.25089	SGGFPa6-2011 down vs IFskina6-2011
10607113	35228	NM_134257 // Rgs3 // regulator of G-protein signaling 3 // 4 B3|4 35.0 cM // 50780 ///	Rgs3	NM_134257	0.460486	-2.17162	SGGFPa6-2010 down vs IFskina6-2010	0.42563	-2.34946	SGGFPa6-2011 down vs IFskina6-2011
10404341	12826	NM_011165 // Prl4a1 // prolactin family 4, subfamily a, member 1 // 13 A3.1|13 14.0 cM	Prl4a1	NM_011165	0.460254	-2.17272	SGGFPa6-2010 down vs IFskina6-2010	0.315781	-3.16676	SGGFPa6-2011 down vs IFskina6-2011
10409866	13517	NM_007797 // Ctla2b // cytotoxic T lymphocyte-associated protein 2 beta // 12 C1|13 //	Ctla2b	NM_007797	0.460116	-2.17336	SGGFPa6-2010 down vs IFskina6-2010	0.276516	-3.61642	SGGFPa6-2011 down vs IFskina6-2011
10574524	31543	NM_145603 // Ces2c // carboxylesterase 2C // 8 D3|8 // 234671 /// ENSMUST00000055052 //	Ces2c	NM_145603	0.460043	-2.17371	SGGFPa6-2010 down vs IFskina6-2010	0.313162	-3.19323	SGGFPa6-2011 down vs IFskina6-2011				Sig Transduction Inhibitor
10601603	34522	NM_001033241 // Gm382 // predicted gene 382 // X E3|X // 211208 /// ENSMUST00000096332	Gm382	NM_001033241	0.459778	-2.17496	SGGFPa6-2010 down vs IFskina6-2010	0.359336	-2.78291	SGGFPa6-2011 down vs IFskina6-2011
10600057	34316	NM_007724 // Cnga2 // cyclic nucleotide gated channel alpha 2 // X|X A6 // 12789 /// EN	Cnga2	NM_007724	0.459487	-2.17634	SGGFPa6-2010 down vs IFskina6-2010	0.257306	-3.88642	SGGFPa6-2011 down vs IFskina6-2011
10493690	22440	NM_029937 // Nup210l // nucleoporin 210-like // 3|3 F2 // 77595 /// ENSMUST00000029548	Nup210l	NM_029937	0.459487	-2.17634	SGGFPa6-2010 down vs IFskina6-2010	0.361925	-2.763	SGGFPa6-2011 down vs IFskina6-2011
10558118	29462	NM_001081038 // Btbd16 // BTB (POZ) domain containing 16 // 7 F3|7 // 330660 /// ENSMUS	Btbd16	NM_001081038	0.459382	-2.17684	SGGFPa6-2010 down vs IFskina6-2010	0.487818	-2.04994	SGGFPa6-2011 down vs IFskina6-2011
10582658	32376	NM_007428 // Agt // angiotensinogen (serpin peptidase inhibitor, clade A, member 8) //	Agt	NM_007428	0.459148	-2.17795	SGGFPa6-2010 down vs IFskina6-2010	0.3494	-2.86205	SGGFPa6-2011 down vs IFskina6-2011
10563112	30050	NR_001277 // Snord33 // small nucleolar RNA, C/D box 33 // 7 B4|7 // 27208	Snord33	NR_001277	0.458549	-2.18079	SGGFPa6-2010 down vs IFskina6-2010	0.134616	-7.42856	SGGFPa6-2011 down vs IFskina6-2011
10573346	31414	NR_029741 // Mir24-2 // microRNA 24-2 // 8|8 // 723960	Mir24-2	NR_029741	0.458436	-2.18133	SGGFPa6-2010 down vs IFskina6-2010	0.483112	-2.06991	SGGFPa6-2011 down vs IFskina6-2011
10405585	12961	ENSMUST00000099474 // Gm10781 // predicted gene 10781 // --- // 100038721	Gm10781	ENSMUST00000099474	0.458098	-2.18294	SGGFPa6-2010 down vs IFskina6-2010	0.247967	-4.03279	SGGFPa6-2011 down vs IFskina6-2011
10395201	11782	NM_021353 // Slc26a3 // solute carrier family 26, member 3 // 12 A3|12 11.0 cM // 13487	Slc26a3	NM_021353	0.458098	-2.18294	SGGFPa6-2010 down vs IFskina6-2010	0.316307	-3.16149	SGGFPa6-2011 down vs IFskina6-2011
10349593	7110	NM_026976 // Faim3 // Fas apoptotic inhibitory molecule 3 // 1 E4|1 // 69169 /// ENSMUS	Faim3	NM_026976	0.457823	-2.18425	SGGFPa6-2010 down vs IFskina6-2010	0.416096	-2.40329	SGGFPa6-2011 down vs IFskina6-2011
10379176	10188	NM_011676 // Unc119 // unc-119 homolog (C. elegans) // 11 B5|11 44.99 cM // 22248 /// E	Unc119	NM_011676	0.457681	-2.18493	SGGFPa6-2010 down vs IFskina6-2010	0.312088	-3.20422	SGGFPa6-2011 down vs IFskina6-2011
10508770	24129	AK142202 // Gm13033 // prostaglandin-endoperoxide synthase 2 pseudogene // 4 D2.3|4 //	Gm13033	AK142202	0.456941	-2.18847	SGGFPa6-2010 down vs IFskina6-2010	0.338387	-2.95519	SGGFPa6-2011 down vs IFskina6-2011
10461605	19048	NM_021718 // Ms4a4b // membrane-spanning 4-domains, subfamily A, member 4B // 19 A|19 /	Ms4a4b	NM_021718	0.456735	-2.18945	SGGFPa6-2010 down vs IFskina6-2010	0.476885	-2.09694	SGGFPa6-2011 down vs IFskina6-2011
10536600	26967	NM_001167757 // Ankrd7 // ankyrin repeat domain 7 // 6 A2|6 // 75196 /// NM_029202 // A	Ankrd7	NM_001167757	0.456731	-2.18947	SGGFPa6-2010 down vs IFskina6-2010	0.490292	-2.0396	SGGFPa6-2011 down vs IFskina6-2011
10592164	33406	NM_020264 // Pate4 // prostate and testis expressed 4 // 9 A4|9 // 56872 /// ENSMUST000	Pate4	NM_020264	0.456542	-2.19038	SGGFPa6-2010 down vs IFskina6-2010	0.49975	-2.001	SGGFPa6-2011 down vs IFskina6-2011
10605820	35065	NM_001003916 // Zc4h2 // zinc finger, C4H2 domain containing // X C3|X // 245522 /// EN	Zc4h2	NM_001003916	0.456008	-2.19295	SGGFPa6-2010 down vs IFskina6-2010	0.493837	-2.02496	SGGFPa6-2011 down vs IFskina6-2011
10600080	34320	BC116353 // Magea9-ps // melanoma antigen, family A, 9, pseudogene // X A7.3|X 28.83 cM	Magea9-ps	BC116353	0.455794	-2.19397	SGGFPa6-2010 down vs IFskina6-2010	0.484283	-2.06491	SGGFPa6-2011 down vs IFskina6-2011
10391504	11440	NM_010791 // Meox1 // mesenchyme homeobox 1 // 11 D|11 58.0 cM // 17285 /// ENSMUST0000	Meox1	NM_010791	0.455654	-2.19465	SGGFPa6-2010 down vs IFskina6-2010	0.236818	-4.22264	SGGFPa6-2011 down vs IFskina6-2011
10496490	22738	NR_035481 // Mir1956 // microRNA mir-1956 // --- // 100316706 /// ENSMUST00000116120 //	Mir1956	NR_035481	0.455601	-2.19491	SGGFPa6-2010 down vs IFskina6-2010	0.426293	-2.3458	SGGFPa6-2011 down vs IFskina6-2011
10604682	34912	BC147598 // Gm648 // predicted gene 648 // X A5|X // 270599 /// NM_001033372 // Gm648 /	Gm648	BC147598	0.455196	-2.19686	SGGFPa6-2010 down vs IFskina6-2010	0.302477	-3.30604	SGGFPa6-2011 down vs IFskina6-2011
10370538	9311	NM_146308 // Olfr1356 // olfactory receptor 1356 // 10 C2|10 // 258305 /// ENSMUST00000	Olfr1356	NM_146308	0.454783	-2.19885	SGGFPa6-2010 down vs IFskina6-2010	0.390223	-2.56264	SGGFPa6-2011 down vs IFskina6-2011
10544263	27806	NM_026317 // Prss37 // protease, serine, 37 // 6|6 B2 // 67690 /// ENSMUST00000031967 /	Prss37	NM_026317	0.454775	-2.19889	SGGFPa6-2010 down vs IFskina6-2010	0.306287	-3.26492	SGGFPa6-2011 down vs IFskina6-2011
10432723	15972	NM_053249 // Krt82 // keratin 82 // 15 F2|15 58.75 cM // 114566 /// ENSMUST00000023713	Krt82	NM_053249	0.45474	-2.19906	SGGFPa6-2010 down vs IFskina6-2010	0.423303	-2.36237	SGGFPa6-2011 down vs IFskina6-2011
10426208	15304	NM_182928 // Adm2 // adrenomedullin 2 // 15 E3|15 // 223780 /// ENSMUST00000066991 // A	Adm2	NM_182928	0.454689	-2.19931	SGGFPa6-2010 down vs IFskina6-2010	0.364444	-2.7439	SGGFPa6-2011 down vs IFskina6-2011
10484848	21539	NM_146373 // Olfr1253 // olfactory receptor 1253 // 2 E1|2 // 258370 /// ENSMUST0000009	Olfr1253	NM_146373	0.454477	-2.20033	SGGFPa6-2010 down vs IFskina6-2010	0.245474	-4.07375	SGGFPa6-2011 down vs IFskina6-2011
10376956	10000	NM_178870 // Hs3st3a1 // heparan sulfate (glucosamine) 3-O-sulfotransferase 3A1 // 11 B	Hs3st3a1	NM_178870	0.45369	-2.20415	SGGFPa6-2010 down vs IFskina6-2010	0.452483	-2.21003	SGGFPa6-2011 down vs IFskina6-2011
10501744	23344	ENSMUST00000029642 // 1700061I17Rik // RIKEN cDNA 1700061I17 gene // 3 G1|3 // 433646	1700061I17Rik	ENSMUST00000029642	0.453152	-2.20676	SGGFPa6-2010 down vs IFskina6-2010	0.455742	-2.19422	SGGFPa6-2011 down vs IFskina6-2011
10447477	17555	ENSMUST00000097270 // Gm10493 // predicted gene 10493 // 17 E5|17 // 623954	Gm10493	ENSMUST00000097270	0.453088	-2.20708	SGGFPa6-2010 down vs IFskina6-2010	0.49621	-2.01528	SGGFPa6-2011 down vs IFskina6-2011
10583386	32478	NM_001012266 // Olfr835 // olfactory receptor 835 // 9 A2|9 // 257872 /// ENSMUST000000	Olfr835	NM_001012266	0.453073	-2.20715	SGGFPa6-2010 down vs IFskina6-2010	0.477608	-2.09377	SGGFPa6-2011 down vs IFskina6-2011
10473089	20233	NM_001080711 // Dfnb59 // deafness, autosomal recessive 59 (human) // 2 C3|2 // 381375	Dfnb59	NM_001080711	0.45304	-2.20731	SGGFPa6-2010 down vs IFskina6-2010	0.47928	-2.08646	SGGFPa6-2011 down vs IFskina6-2011
10441669	16949	NM_009309 // T // brachyury // 17 A1|17 4.02 cM // 20997 /// ENSMUST00000074667 // T //	T	NM_009309	0.452944	-2.20778	SGGFPa6-2010 down vs IFskina6-2010	0.449524	-2.22457	SGGFPa6-2011 down vs IFskina6-2011				Apoptosis
10606770	35188	NM_175446 // Zmat1 // zinc finger, matrin type 1 // X E3|X // 215693 /// ENSMUST0000006	Zmat1	NM_175446	0.45293	-2.20785	SGGFPa6-2010 down vs IFskina6-2010	0.3711	-2.69469	SGGFPa6-2011 down vs IFskina6-2011
10484535	21394	NM_001011695 // Olfr1000 // olfactory receptor 1000 // 2 D|2 // 257899 /// ENSMUST00000	Olfr1000	NM_001011695	0.451152	-2.21655	SGGFPa6-2010 down vs IFskina6-2010	0.328198	-3.04694	SGGFPa6-2011 down vs IFskina6-2011
10545028	27912	NM_134173 // Vmn1r24 // vomeronasal 1 receptor 24 // 6 B3|6 // 171191 /// ENSMUST000000	Vmn1r24	NM_134173	0.450927	-2.21765	SGGFPa6-2010 down vs IFskina6-2010	0.213277	-4.68873	SGGFPa6-2011 down vs IFskina6-2011
10544751	27870	NM_010451 // Hoxa2 // homeobox A2 // 6 B3|6 26.29 cM // 15399 /// ENSMUST00000014848 //	Hoxa2	NM_010451	0.45049	-2.2198	SGGFPa6-2010 down vs IFskina6-2010	0.492553	-2.03024	SGGFPa6-2011 down vs IFskina6-2011
10408689	13384	NM_153529 // Nrn1 // neuritin 1 // 13 A3.3|13 // 68404 /// ENSMUST00000037623 // Nrn1 /	Nrn1	NM_153529	0.45049	-2.2198	SGGFPa6-2010 down vs IFskina6-2010	0.234908	-4.25699	SGGFPa6-2011 down vs IFskina6-2011
10533428	26663	NM_183307 // Ccdc63 // coiled-coil domain containing 63 // 5 F|5 // 330188 /// ENSMUST0	Ccdc63	NM_183307	0.450478	-2.21986	SGGFPa6-2010 down vs IFskina6-2010	0.339095	-2.94903	SGGFPa6-2011 down vs IFskina6-2011
10483789	21336	NM_007967 // Evx2 // even skipped homeotic gene 2 homolog // 2 C3|2 45.0 cM // 14029 //	Evx2	NM_007967	0.450429	-2.22011	SGGFPa6-2010 down vs IFskina6-2010	0.396414	-2.52261	SGGFPa6-2011 down vs IFskina6-2011
10583496	32507	NM_145610 // Ppan // peter pan homolog (Drosophila) // 9 A3|9 // 235036 /// ENSMUST0000	Ppan	NM_145610	0.450094	-2.22176	SGGFPa6-2010 down vs IFskina6-2010	0.472181	-2.11783	SGGFPa6-2011 down vs IFskina6-2011
10473588	20343	NM_146771 // Olfr1176 // olfactory receptor 1176 // 2 D|2 // 258767 /// ENSMUST00000057	Olfr1176	NM_146771	0.450018	-2.22213	SGGFPa6-2010 down vs IFskina6-2010	0.356056	-2.80855	SGGFPa6-2011 down vs IFskina6-2011				Apoptosis
10474504	20463	NM_146404 // Olfr1289 // olfactory receptor 1289 // 2 E5|2 // 258399	Olfr1289	NM_146404	0.450018	-2.22213	SGGFPa6-2010 down vs IFskina6-2010	0.499205	-2.00318	SGGFPa6-2011 down vs IFskina6-2011				Receptor
10602038	34578	BC119078 // E230019M04Rik // RIKEN cDNA E230019M04 gene // X F1|X // 331537 /// NM_1779	E230019M04Rik	BC119078	0.449603	-2.22419	SGGFPa6-2010 down vs IFskina6-2010	0.411918	-2.42767	SGGFPa6-2011 down vs IFskina6-2011
10588883	33080	NM_001013814 // Amt // aminomethyltransferase // 9 F2|9 // 434437 /// ENSMUST0000003523	Amt	NM_001013814	0.449174	-2.22631	SGGFPa6-2010 down vs IFskina6-2010	0.485151	-2.06121	SGGFPa6-2011 down vs IFskina6-2011
10436363	16330	NM_001040397 // Filip1l // filamin A interacting protein 1-like // 16 C1.1|16 // 78749	Filip1l	NM_001040397	0.449174	-2.22631	SGGFPa6-2010 down vs IFskina6-2010	0.431255	-2.31882	SGGFPa6-2011 down vs IFskina6-2011
10351507	7307	ENSMUST00000097468 // Gm10522 // predicted gene 10522 // --- // 100038407	Gm10522	ENSMUST00000097468	0.449174	-2.22631	SGGFPa6-2010 down vs IFskina6-2010	0.446002	-2.24214	SGGFPa6-2011 down vs IFskina6-2011
10475427	20547	NM_028914 // 4933406J08Rik // RIKEN cDNA 4933406J08 gene // 2|2 F1 // 74401 /// ENSMUST	4933406J08Rik	NM_028914	0.448789	-2.22822	SGGFPa6-2010 down vs IFskina6-2010	0.277767	-3.60014	SGGFPa6-2011 down vs IFskina6-2011
10398382	12124	NR_029880 // Mir379 // microRNA 379 // 12|12 // 723858	Mir379	NR_029880	0.448341	-2.23044	SGGFPa6-2010 down vs IFskina6-2010	0.174768	-5.72188	SGGFPa6-2011 down vs IFskina6-2011
10431147	15846	NM_177630 // Ldoc1l // leucine zipper, down-regulated in cancer 1-like // 15 E2|15 // 2	Ldoc1l	NM_177630	0.447577	-2.23425	SGGFPa6-2010 down vs IFskina6-2010	0.443419	-2.2552	SGGFPa6-2011 down vs IFskina6-2011
10504206	23633	BC057092 // N28178 // expressed sequence N28178 // 4 A5|4 // 230085 /// AK122428 // N28	N28178	BC057092	0.447577	-2.23425	SGGFPa6-2010 down vs IFskina6-2010	0.498259	-2.00699	SGGFPa6-2011 down vs IFskina6-2011
10600814	34414	NM_008179 // Gspt2 // G1 to S phase transition 2 // X|X B1 // 14853 /// AB003503 // Gsp	Gspt2	NM_008179	0.447488	-2.2347	SGGFPa6-2010 down vs IFskina6-2010	0.42298	-2.36418	SGGFPa6-2011 down vs IFskina6-2011
10549751	28459	NM_001033383 // Zfp865 // zinc finger protein 865 // 7 A1|7 // 319748 /// ENSMUST000000	Zfp865	NM_001033383	0.447488	-2.2347	SGGFPa6-2010 down vs IFskina6-2010	0.470264	-2.12646	SGGFPa6-2011 down vs IFskina6-2011
10362273	8428	NR_028030 // Gm9767 // predicted gene 9767 // 10 A4|10 // 100040851 /// NM_029881 // Tm	Gm9767	NR_028030	0.446437	-2.23996	SGGFPa6-2010 down vs IFskina6-2010	0.434703	-2.30042	SGGFPa6-2011 down vs IFskina6-2011
10441660	16948	NM_001161832 // T2 // brachyury 2 // 17 A1|17 4.01 cM // 21331 /// ENSMUST00000082148 /	T2	NM_001161832	0.446038	-2.24196	SGGFPa6-2010 down vs IFskina6-2010	0.385344	-2.59509	SGGFPa6-2011 down vs IFskina6-2011
10441899	16969	NM_001122977 // Gm7168 // predicted gene 7168 // 17 A2|17 // 635895 /// ENSMUST00000088	Gm7168	NM_001122977	0.445865	-2.24283	SGGFPa6-2010 down vs IFskina6-2010	0.249541	-4.00735	SGGFPa6-2011 down vs IFskina6-2011
10580484	32146	NM_172757 // Heatr3 // HEAT repeat containing 3 // 8 C3|8 // 234549 /// ENSMUST00000034	Heatr3	NM_172757	0.44581	-2.24311	SGGFPa6-2010 down vs IFskina6-2010	0.475715	-2.1021	SGGFPa6-2011 down vs IFskina6-2011				Cell Junction/Txn
10492113	22276	NM_177203 // A730037C10Rik // RIKEN cDNA A730037C10 gene // 3 C|3 // 320604 /// ENSMUST	A730037C10Rik	NM_177203	0.445637	-2.24398	SGGFPa6-2010 down vs IFskina6-2010	0.327261	-3.05566	SGGFPa6-2011 down vs IFskina6-2011
10600317	34342	NM_008106 // Opn1mw // opsin 1 (cone pigments), medium-wave-sensitive (color blindness,	Opn1mw	NM_008106	0.445275	-2.2458	SGGFPa6-2010 down vs IFskina6-2010	0.474172	-2.10894	SGGFPa6-2011 down vs IFskina6-2011
10576559	31718	NM_028908 // 4933403G14Rik // RIKEN cDNA 4933403G14 gene // 8 E2|8 // 74393 /// ENSMUST	4933403G14Rik	NM_028908	0.444357	-2.25044	SGGFPa6-2010 down vs IFskina6-2010	0.394119	-2.5373	SGGFPa6-2011 down vs IFskina6-2011				ECM
10546244	28093	NM_027928 // Chst13 // carbohydrate (chondroitin 4) sulfotransferase 13 // 6 D1|6 // 71	Chst13	NM_027928	0.444164	-2.25142	SGGFPa6-2010 down vs IFskina6-2010	0.471359	-2.12152	SGGFPa6-2011 down vs IFskina6-2011
10473598	20348	NM_146530 // Olfr1186 // olfactory receptor 1186 // 2 D|2 // 258523 /// ENSMUST00000075	Olfr1186	NM_146530	0.444159	-2.25145	SGGFPa6-2010 down vs IFskina6-2010	0.413798	-2.41664	SGGFPa6-2011 down vs IFskina6-2011
10569149	30953	NR_033532 // B230206H07Rik // RIKEN cDNA B230206H07 gene // 7 F5|7 // 320871 /// NM_133	B230206H07Rik	NR_033532	0.443971	-2.2524	SGGFPa6-2010 down vs IFskina6-2010	0.397652	-2.51476	SGGFPa6-2011 down vs IFskina6-2011
10537406	27040	NM_001101507 // Clec2l // C-type lectin domain family, member L // 6 B1|6 // 665180 ///	Clec2l	NM_001101507	0.443935	-2.25258	SGGFPa6-2010 down vs IFskina6-2010	0.435891	-2.29415	SGGFPa6-2011 down vs IFskina6-2011
10495613	22650	NM_029425 // 4833424O15Rik // RIKEN cDNA 4833424O15 gene // 3|3 G2 // 75769 /// ENSMUST	4833424O15Rik	NM_029425	0.443869	-2.25292	SGGFPa6-2010 down vs IFskina6-2010	0.415756	-2.40526	SGGFPa6-2011 down vs IFskina6-2011
10396767	11933	NM_029069 // Fam71d // family with sequence similarity 71, member D // 12|12 D2 // 7089	Fam71d	NM_029069	0.443245	-2.25609	SGGFPa6-2010 down vs IFskina6-2010	0.288795	-3.46267	SGGFPa6-2011 down vs IFskina6-2011
10387985	11078	NM_001045526 // A430084P05Rik // RIKEN cDNA A430084P05 gene // 11 B3|11 // 327957 /// E	A430084P05Rik	NM_001045526	0.442999	-2.25734	SGGFPa6-2010 down vs IFskina6-2010	0.350318	-2.85455	SGGFPa6-2011 down vs IFskina6-2011
10551061	28662	NM_175477 // Zfp574 // zinc finger protein 574 // 7 A3|7 // 232976 /// NM_001168506 //	Zfp574	NM_175477	0.442669	-2.25902	SGGFPa6-2010 down vs IFskina6-2010	0.336154	-2.97483	SGGFPa6-2011 down vs IFskina6-2011
10538871	27221	Z95479 // Gm4964 // predicted gene 4964 // 6 C1|6 // 243420 /// Z95479 // Gm4964 // pre	Gm4964	Z95479	0.442333	-2.26074	SGGFPa6-2010 down vs IFskina6-2010	0.429826	-2.32652	SGGFPa6-2011 down vs IFskina6-2011				keratinization
10407445	13202	NM_013777 // Akr1c12 // aldo-keto reductase family 1, member C12 // 13 A1|13 // 622402	Akr1c12	NM_013777	0.441703	-2.26397	SGGFPa6-2010 down vs IFskina6-2010	0.25961	-3.85194	SGGFPa6-2011 down vs IFskina6-2011
10372829	9531	ENSMUST00000099196 // Gm10741 // predicted gene 10741 // --- // 100038403	Gm10741	ENSMUST00000099196	0.441703	-2.26397	SGGFPa6-2010 down vs IFskina6-2010	0.402117	-2.48684	SGGFPa6-2011 down vs IFskina6-2011
10371134	9364	NM_148951 // Gipc3 // GIPC PDZ domain containing family, member 3 // 10 C1|10 // 209047	Gipc3	NM_148951	0.441489	-2.26506	SGGFPa6-2010 down vs IFskina6-2010	0.394254	-2.53643	SGGFPa6-2011 down vs IFskina6-2011				Cell Junction/Cytoskeleton
10426606	15347	BC048564 // 4930415O20Rik // RIKEN cDNA 4930415O20 gene // 15|15 F2 // 73863 /// ENSMUS	4930415O20Rik	BC048564	0.441261	-2.26623	SGGFPa6-2010 down vs IFskina6-2010	0.264517	-3.78047	SGGFPa6-2011 down vs IFskina6-2011
10584376	32598	NM_146482 // Olfr889 // olfactory receptor 889 // 9 A5|9 // 258475 /// ENSMUST000000722	Olfr889	NM_146482	0.440561	-2.26983	SGGFPa6-2010 down vs IFskina6-2010	0.302282	-3.30817	SGGFPa6-2011 down vs IFskina6-2011
10537696	27072	NM_001003952 // Sval3 // seminal vesicle antigen-like 3 // 6 B2.1|6 // 387564 /// ENSMU	Sval3	NM_001003952	0.440561	-2.26983	SGGFPa6-2010 down vs IFskina6-2010	0.151671	-6.5932	SGGFPa6-2011 down vs IFskina6-2011
10463104	19233	XM_001000795 // Cc2d2b // coiled-coil and C2 domain containing 2B // 19 C3|19 // 668310	Cc2d2b	XM_001000795	0.440432	-2.2705	SGGFPa6-2010 down vs IFskina6-2010	0.443711	-2.25372	SGGFPa6-2011 down vs IFskina6-2011
10373372	9573	NM_001081040 // Coq10a // coenzyme Q10 homolog A (yeast) // 10 D3|10 // 210582 /// ENSM	Coq10a	NM_001081040	0.440354	-2.2709	SGGFPa6-2010 down vs IFskina6-2010	0.490675	-2.03801	SGGFPa6-2011 down vs IFskina6-2011
10424660	15142	ENSMUST00000050234 // Jrk // jerky // 15 D3|15 42.8 cM // 16469 /// NR_033197 // 493342	Jrk	ENSMUST00000050234	0.440195	-2.27172	SGGFPa6-2010 down vs IFskina6-2010	0.495377	-2.01867	SGGFPa6-2011 down vs IFskina6-2011
10453390	18185	NR_015387 // Six3os1 // Six3 opposite strand transcript 1 // 17 E4|17 // 100043902 ///	Six3os1	NR_015387	0.439787	-2.27383	SGGFPa6-2010 down vs IFskina6-2010	0.260849	-3.83364	SGGFPa6-2011 down vs IFskina6-2011
10478633	20878	NM_013599 // Mmp9 // matrix metallopeptidase 9 // 2 H1-H2|2 96.0 cM // 17395 /// ENSMUS	Mmp9	NM_013599	0.43973	-2.27412	SGGFPa6-2010 down vs IFskina6-2010	0.315794	-3.16662	SGGFPa6-2011 down vs IFskina6-2011
10371627	9413	NM_175418 // Mybpc1 // myosin binding protein C, slow-type // 10 C1|10 // 109272 /// EN	Mybpc1	NM_175418	0.439666	-2.27445	SGGFPa6-2010 down vs IFskina6-2010	0.481361	-2.07744	SGGFPa6-2011 down vs IFskina6-2011
10559498	29599	NR_033568 // 9430041J12Rik // RIKEN cDNA 9430041J12 gene // 7|7 // 77323	9430041J12Rik	NR_033568	0.439526	-2.27518	SGGFPa6-2010 down vs IFskina6-2010	0.42253	-2.3667	SGGFPa6-2011 down vs IFskina6-2011
10488802	21909	NM_199304 // Zfp341 // zinc finger protein 341 // 2 H1|2 // 228807 /// ENSMUST000000819	Zfp341	NM_199304	0.439526	-2.27518	SGGFPa6-2010 down vs IFskina6-2010	0.184971	-5.40626	SGGFPa6-2011 down vs IFskina6-2011
10464030	19323	NM_007417 // Adra2a // adrenergic receptor, alpha 2a // 19 D2|19 50.0 cM // 11551 /// E	Adra2a	NM_007417	0.439386	-2.2759	SGGFPa6-2010 down vs IFskina6-2010	0.482635	-2.07196	SGGFPa6-2011 down vs IFskina6-2011
10394625	11706	NM_027706 // Nbas // neuroblastoma amplified sequence // 12|12 A3 // 71169	Nbas	NM_027706	0.439282	-2.27644	SGGFPa6-2010 down vs IFskina6-2010	0.306206	-3.26578	SGGFPa6-2011 down vs IFskina6-2011				Intermediate filament
10573190	31396	NM_146270 // Olfr370 // olfactory receptor 370 // 8 C1|8 // 258267 /// ENSMUST000000586	Olfr370	NM_146270	0.439181	-2.27696	SGGFPa6-2010 down vs IFskina6-2010	0.355859	-2.8101	SGGFPa6-2011 down vs IFskina6-2011
10537650	27066	NM_053243 // Prss1 // protease, serine, 1 (trypsin 1) // 6 B1|6 20.5 cM // 114228 /// N	Prss1	NM_053243	0.438857	-2.27865	SGGFPa6-2010 down vs IFskina6-2010	0.488803	-2.04582	SGGFPa6-2011 down vs IFskina6-2011
10578794	31964	NM_175032 // Galntl6 // UDP-N-acetyl-alpha-D-galactosamine:polypeptide N-acetylgalactos	Galntl6	NM_175032	0.438733	-2.27929	SGGFPa6-2010 down vs IFskina6-2010	0.25371	-3.94151	SGGFPa6-2011 down vs IFskina6-2011
10554118	29013	NM_001013811 // Fam169b // family with sequence similarity 169, member B // 7 D1|7 // 4	Fam169b	NM_001013811	0.438561	-2.28018	SGGFPa6-2010 down vs IFskina6-2010	0.474172	-2.10894	SGGFPa6-2011 down vs IFskina6-2011
10497345	22833	NM_001076679 // Gm9733 // predicted gene 9733 // 3 A1|3 // 751864 /// ENSMUST0000010836	Gm9733	NM_001076679	0.438561	-2.28018	SGGFPa6-2010 down vs IFskina6-2010	0.423146	-2.36325	SGGFPa6-2011 down vs IFskina6-2011
10528925	26191	AK132123 // 3110082J24Rik // RIKEN cDNA 3110082J24 gene // 5 B1|5 // 433868	3110082J24Rik	AK132123	0.43816	-2.28227	SGGFPa6-2010 down vs IFskina6-2010	0.401631	-2.48985	SGGFPa6-2011 down vs IFskina6-2011
10442145	17006	NM_134191 // Vmn1r226 // vomeronasal 1 receptor 226 // 17 A3.2|17 // 171225 /// ENSMUST	Vmn1r226	NM_134191	0.437809	-2.2841	SGGFPa6-2010 down vs IFskina6-2010	0.14133	-7.07565	SGGFPa6-2011 down vs IFskina6-2011
10525076	25818	NM_145565 // Sds // serine dehydratase // 5 F|5 // 231691 /// ENSMUST00000066540 // Sds	Sds	NM_145565	0.437783	-2.28424	SGGFPa6-2010 down vs IFskina6-2010	0.400227	-2.49858	SGGFPa6-2011 down vs IFskina6-2011
10483326	21301	NM_018852 // Scn9a // sodium channel, voltage-gated, type IX, alpha // 2 C1.3|2 36.0 cM	Scn9a	NM_018852	0.437733	-2.2845	SGGFPa6-2010 down vs IFskina6-2010	0.44625	-2.24089	SGGFPa6-2011 down vs IFskina6-2011
10598467	34088	NM_138606 // Pim2 // proviral integration site 2 // X A1.1|X 2.0 cM // 18715 /// ENSMUS	Pim2	NM_138606	0.43759	-2.28524	SGGFPa6-2010 down vs IFskina6-2010	0.495748	-2.01716	SGGFPa6-2011 down vs IFskina6-2011
10415909	14240	NR_029813 // Mir124a-1 // microRNA 124a-1 // 14|14 // 387233	Mir124a-1	NR_029813	0.437233	-2.28711	SGGFPa6-2010 down vs IFskina6-2010	0.385839	-2.59175	SGGFPa6-2011 down vs IFskina6-2011
10364792	8721	NM_183152 // Plk5 // polo-like kinase 5 (Drosophila) // 10 C1|10 // 216166 /// ENSMUST0	Plk5	NM_183152	0.437032	-2.28816	SGGFPa6-2010 down vs IFskina6-2010	0.490488	-2.03879	SGGFPa6-2011 down vs IFskina6-2011
10525179	25826	NM_133893 // Oas1d // 2'-5' oligoadenylate synthetase 1D // 5 F|5 67.0 cM // 100535 ///	Oas1d	NM_133893	0.436716	-2.28982	SGGFPa6-2010 down vs IFskina6-2010	0.333168	-3.00149	SGGFPa6-2011 down vs IFskina6-2011
10348664	7022	NR_029559 // Mir149 // microRNA 149 // 1|1 // 387167	Mir149	NR_029559	0.436386	-2.29155	SGGFPa6-2010 down vs IFskina6-2010	0.397188	-2.5177	SGGFPa6-2011 down vs IFskina6-2011
10400948	12426	NM_029444 // 4930447C04Rik // RIKEN cDNA 4930447C04 gene // 12 C3|12 // 75801 /// ENSMU	4930447C04Rik	NM_029444	0.436335	-2.29181	SGGFPa6-2010 down vs IFskina6-2010	0.461545	-2.16663	SGGFPa6-2011 down vs IFskina6-2011
10516502	24966	NM_027036 // Hmgb4 // high-mobility group box 4 // 4 D2.2|4 // 69317 /// ENSMUST0000005	Hmgb4	NM_027036	0.436113	-2.29299	SGGFPa6-2010 down vs IFskina6-2010	0.27744	-3.60438	SGGFPa6-2011 down vs IFskina6-2011				Cytoskeleton
10349951	7148	ENSMUST00000097570 // Gm8618 // predicted gene 8618 // 1 E4|1 // 667414	Gm8618	ENSMUST00000097570	0.435984	-2.29366	SGGFPa6-2010 down vs IFskina6-2010	0.23523	-4.25116	SGGFPa6-2011 down vs IFskina6-2011
10440700	16859	NM_133359 // AY026312 // cDNA sequence AY026312 // 16 C3.3|16 // 170939 /// AY026312 //	AY026312	NM_133359	0.435902	-2.29409	SGGFPa6-2010 down vs IFskina6-2010	0.411142	-2.43225	SGGFPa6-2011 down vs IFskina6-2011
10512301	24488	NM_001017362 // Arid3c // AT rich interactive domain 3C (BRIGHT-like) // 4 A5|4 // 5506	Arid3c	NM_001017362	0.435477	-2.29633	SGGFPa6-2010 down vs IFskina6-2010	0.288873	-3.46173	SGGFPa6-2011 down vs IFskina6-2011
10357553	7907	NM_053095 // Il24 // interleukin 24 // 1 E4|1 // 93672 /// ENSMUST00000121040 // Il24 /	Il24	NM_053095	0.435432	-2.29657	SGGFPa6-2010 down vs IFskina6-2010	0.258971	-3.86144	SGGFPa6-2011 down vs IFskina6-2011
10592401	33444	NR_033620 // Olfr947-ps1 // olfactory receptor 947, pseudogene 1 // 9 A5.1|9 // 257924	Olfr947-ps1	NR_033620	0.434232	-2.30292	SGGFPa6-2010 down vs IFskina6-2010	0.367465	-2.72135	SGGFPa6-2011 down vs IFskina6-2011
10444135	17205	NR_033305 // AA388235 // expressed sequence AA388235 // 17 B1|17 // 433100 /// ENSMUST0	AA388235	NR_033305	0.434111	-2.30356	SGGFPa6-2010 down vs IFskina6-2010	0.402429	-2.48491	SGGFPa6-2011 down vs IFskina6-2011
10414483	14020	NM_146430 // Olfr742 // olfactory receptor 742 // 14 C1|14 // 258422 /// ENSMUST0000008	Olfr742	NM_146430	0.43353	-2.30664	SGGFPa6-2010 down vs IFskina6-2010	0.234544	-4.26359	SGGFPa6-2011 down vs IFskina6-2011
10596093	33816	XM_003086755 // Gm5161 // predicted pseudogene 5161 // 9 E4|9 // 382099	Gm5161	XM_003086755	0.433362	-2.30754	SGGFPa6-2010 down vs IFskina6-2010	0.474068	-2.1094	SGGFPa6-2011 down vs IFskina6-2011
10567106	30709	NR_003634 // Rps4y2 // ribosomal protein S4, Y-linked 2 // 6 G3|6 // 66184 /// ENSMUST0	Rps4y2	NR_003634	0.433249	-2.30814	SGGFPa6-2010 down vs IFskina6-2010	0.213082	-4.69304	SGGFPa6-2011 down vs IFskina6-2011
10429140	15636	NM_008681 // Ndrg1 // N-myc downstream regulated gene 1 // 15 D2|15 // 17988 /// ENSMUS	Ndrg1	NM_008681	0.43286	-2.31021	SGGFPa6-2010 down vs IFskina6-2010	0.0632798	-15.8028	SGGFPa6-2011 down vs IFskina6-2011
10529711	26261	NM_013748 // Clnk // cytokine-dependent hematopoietic cell linker // 5 B3|5 // 27278 //	Clnk	NM_013748	0.43275	-2.31081	SGGFPa6-2010 down vs IFskina6-2010	0.441679	-2.26409	SGGFPa6-2011 down vs IFskina6-2011
10562169	29937	NM_032541 // Hamp // hepcidin antimicrobial peptide // 7 B1|7 11.0 cM // 84506 /// ENSM	Hamp	NM_032541	0.432722	-2.31095	SGGFPa6-2010 down vs IFskina6-2010	0.431255	-2.31882	SGGFPa6-2011 down vs IFskina6-2011
10490304	22082	NM_177191 // Sycp2 // synaptonemal complex protein 2 // 2 H4|2 // 320558 /// DQ103262 /	Sycp2	NM_177191	0.432722	-2.31095	SGGFPa6-2010 down vs IFskina6-2010	0.388786	-2.57211	SGGFPa6-2011 down vs IFskina6-2011
10441954	16976	AK019108 // 2210404J11Rik // RIKEN cDNA 2210404J11 gene // 17 A2|17 // 381062	2210404J11Rik	AK019108	0.432721	-2.31096	SGGFPa6-2010 down vs IFskina6-2010	0.455429	-2.19573	SGGFPa6-2011 down vs IFskina6-2011
10584498	32643	NM_146504 // Olfr961 // olfactory receptor 961 // 9 A5|9 // 258497 /// ENSMUST000000765	Olfr961	NM_146504	0.432003	-2.3148	SGGFPa6-2010 down vs IFskina6-2010	0.443711	-2.25372	SGGFPa6-2011 down vs IFskina6-2011
10350337	7181	ENSMUST00000054333 // A130050O07Rik // RIKEN cDNA A130050O07 gene // 1 E4|1 // 320138	A130050O07Rik	ENSMUST00000054333	0.431683	-2.31651	SGGFPa6-2010 down vs IFskina6-2010	0.291109	-3.43514	SGGFPa6-2011 down vs IFskina6-2011
10349932	7144	NM_175443 // Etnk2 // ethanolamine kinase 2 // 1 E4|1 // 214253 /// ENSMUST00000135222	Etnk2	NM_175443	0.431491	-2.31755	SGGFPa6-2010 down vs IFskina6-2010	0.344396	-2.90363	SGGFPa6-2011 down vs IFskina6-2011
10550155	28528	NM_001033418 // Bsph1 // binder of sperm protein homolog 1 // 7 A1|7 // 330470 /// ENSM	Bsph1	NM_001033418	0.431387	-2.3181	SGGFPa6-2010 down vs IFskina6-2010	0.258743	-3.86484	SGGFPa6-2011 down vs IFskina6-2011
10395374	11802	NR_003649 // Gm5434 // ubiquitin-conjugating enzyme E2F (putative) pseudogene // 12 A3|	Gm5434	NR_003649	0.431387	-2.3181	SGGFPa6-2010 down vs IFskina6-2010	0.33959	-2.94473	SGGFPa6-2011 down vs IFskina6-2011
10545194	27952	NR_004434 // Rprl1 // ribonuclease P RNA-like 1 // 6|6 // 19783 /// M17720 // Gm8760 //	Rprl1	NR_004434	0.431314	-2.3185	SGGFPa6-2010 down vs IFskina6-2010	0.455013	-2.19774	SGGFPa6-2011 down vs IFskina6-2011				Cell Cycle/Txn
10415431	14185	NM_008570 // Mcpt1 // mast cell protease 1 // 14 C3|14 20.0 cM // 17224 /// ENSMUST0000	Mcpt1	NM_008570	0.430096	-2.32506	SGGFPa6-2010 down vs IFskina6-2010	0.299002	-3.34446	SGGFPa6-2011 down vs IFskina6-2011
10449292	17758	NM_008700 // Nkx2-5 // NK2 transcription factor related, locus 5 (Drosophila) // 17 A3.	Nkx2-5	NM_008700	0.430088	-2.32511	SGGFPa6-2010 down vs IFskina6-2010	0.497282	-2.01093	SGGFPa6-2011 down vs IFskina6-2011
10603206	34691	BC022960 // BC022960 // cDNA sequence BC022960 // X F5|X // 237246	BC022960	BC022960	0.429979	-2.32569	SGGFPa6-2010 down vs IFskina6-2010	0.38589	-2.59141	SGGFPa6-2011 down vs IFskina6-2011
10474522	20471	NM_146448 // Olfr1317 // olfactory receptor 1317 // 2 F2-F3|2 // 258440 /// ENSMUST0000	Olfr1317	NM_146448	0.429979	-2.32569	SGGFPa6-2010 down vs IFskina6-2010	0.458177	-2.18256	SGGFPa6-2011 down vs IFskina6-2011
10587347	32938	NM_205822 // Omt2b // oocyte maturation, beta // 9 E1|9 43.0 cM // 382088 /// ENSMUST00	Omt2b	NM_205822	0.429979	-2.32569	SGGFPa6-2010 down vs IFskina6-2010	0.361925	-2.763	SGGFPa6-2011 down vs IFskina6-2011
10542951	27680	NR_030250 // Mir489 // microRNA 489 // 6|6 // 723877	Mir489	NR_030250	0.429177	-2.33004	SGGFPa6-2010 down vs IFskina6-2010	0.33321	-3.00111	SGGFPa6-2011 down vs IFskina6-2011
10440182	16776	NM_146991 // Olfr206 // olfactory receptor 206 // 16 C2|16 // 258993 /// ENSMUST0000008	Olfr206	NM_146991	0.429177	-2.33004	SGGFPa6-2010 down vs IFskina6-2010	0.319582	-3.12909	SGGFPa6-2011 down vs IFskina6-2011
10507539	24000	NM_019422 // Elovl1 // elongation of very long chain fatty acids (FEN1/Elo2, SUR4/Elo3,	Elovl1	NM_019422	0.429136	-2.33026	SGGFPa6-2010 down vs IFskina6-2010	0.470575	-2.12506	SGGFPa6-2011 down vs IFskina6-2011
10413393	13891	NM_010420 // Hesx1 // homeobox gene expressed in ES cells // 14|14 A3-B // 15209 /// EN	Hesx1	NM_010420	0.429125	-2.33032	SGGFPa6-2010 down vs IFskina6-2010	0.325678	-3.07052	SGGFPa6-2011 down vs IFskina6-2011
10409282	13455	NM_013846 // Ror2 // receptor tyrosine kinase-like orphan receptor 2 // 13 B3|13 34.2 c	Ror2	NM_013846	0.429114	-2.33038	SGGFPa6-2010 down vs IFskina6-2010	0.430868	-2.3209	SGGFPa6-2011 down vs IFskina6-2011
10583438	32496	NM_146903 // Olfr871 // olfactory receptor 871 // 9 A2-A5|9 // 258905 /// ENSMUST000000	Olfr871	NM_146903	0.428188	-2.33542	SGGFPa6-2010 down vs IFskina6-2010	0.447073	-2.23677	SGGFPa6-2011 down vs IFskina6-2011
10498568	22986	NM_013665 // Shox2 // short stature homeobox 2 // 3 E3-F1|3 31.6 cM // 20429 /// ENSMUS	Shox2	NM_013665	0.427667	-2.33827	SGGFPa6-2010 down vs IFskina6-2010	0.335028	-2.98482	SGGFPa6-2011 down vs IFskina6-2011				Signal Transduction Inhibitor
10366683	8910	NM_177335 // D930020B18Rik // RIKEN cDNA D930020B18 gene // 10 D2|10 // 216393 /// ENSM	D930020B18Rik	NM_177335	0.427594	-2.33867	SGGFPa6-2010 down vs IFskina6-2010	0.448298	-2.23066	SGGFPa6-2011 down vs IFskina6-2011
10460385	18924	NM_019952 // Clcf1 // cardiotrophin-like cytokine factor 1 // 19 A|19 // 56708 /// ENSM	Clcf1	NM_019952	0.427586	-2.33871	SGGFPa6-2010 down vs IFskina6-2010	0.447964	-2.23232	SGGFPa6-2011 down vs IFskina6-2011
10548978	28391	NM_013797 // Slco1a1 // solute carrier organic anion transporter family, member 1a1 //	Slco1a1	NM_013797	0.427333	-2.34009	SGGFPa6-2010 down vs IFskina6-2010	0.473592	-2.11152	SGGFPa6-2011 down vs IFskina6-2011
10419570	14654	NM_001034102 // Gm5800 // predicted gene 5800 // 14 C2|14 // 545047 /// ENSMUST00000095	Gm5800	NM_001034102	0.427288	-2.34034	SGGFPa6-2010 down vs IFskina6-2010	0.164214	-6.08963	SGGFPa6-2011 down vs IFskina6-2011				Apoptosis
10420472	14752	NM_026461 // 1700129C05Rik // RIKEN cDNA 1700129C05 gene // 14 C3|14 // 67932 /// BC049	1700129C05Rik	NM_026461	0.427208	-2.34078	SGGFPa6-2010 down vs IFskina6-2010	0.407711	-2.45272	SGGFPa6-2011 down vs IFskina6-2011
10598118	34041	NM_009488 // Vmn2r122 // vomeronasal 2, receptor, 122 // 4 82.5 cM // 22308 /// NM_0094	Vmn2r122	NM_009488	0.426521	-2.34455	SGGFPa6-2010 down vs IFskina6-2010	0.358732	-2.78759	SGGFPa6-2011 down vs IFskina6-2011
10436634	16370	XM_001473385 // Gm16509 // predicted gene 16509 // 16 C3.3|16 // 100039724	Gm16509	XM_001473385	0.426397	-2.34523	SGGFPa6-2010 down vs IFskina6-2010	0.300522	-3.32754	SGGFPa6-2011 down vs IFskina6-2011
10524606	25780	NM_026263 // 4930519G04Rik // RIKEN cDNA 4930519G04 gene // 5 F|5 // 67593 /// ENSMUST0	4930519G04Rik	NM_026263	0.425649	-2.34935	SGGFPa6-2010 down vs IFskina6-2010	0.419871	-2.38168	SGGFPa6-2011 down vs IFskina6-2011
10555734	29177	NM_146361 // Olfr557 // olfactory receptor 557 // 7 E3|7 // 258358 /// ENSMUST000000982	Olfr557	NM_146361	0.42549	-2.35023	SGGFPa6-2010 down vs IFskina6-2010	0.288199	-3.46983	SGGFPa6-2011 down vs IFskina6-2011
10605488	35014	NM_008754 // Obp1a // odorant binding protein Ia // X A7.3|X // 18249 /// ENSMUST000000	Obp1a	NM_008754	0.425489	-2.35024	SGGFPa6-2010 down vs IFskina6-2010	0.265215	-3.77053	SGGFPa6-2011 down vs IFskina6-2011
10544715	27865	NR_029719 // Mir148a // microRNA 148a // 6|6 // 387166	Mir148a	NR_029719	0.425358	-2.35096	SGGFPa6-2010 down vs IFskina6-2010	0.308757	-3.23879	SGGFPa6-2011 down vs IFskina6-2011
10551848	28757	NM_146186 // Wdr62 // WD repeat domain 62 // 7 B1|7 // 233064 /// ENSMUST00000047189 //	Wdr62	NM_146186	0.425204	-2.35181	SGGFPa6-2010 down vs IFskina6-2010	0.452687	-2.20903	SGGFPa6-2011 down vs IFskina6-2011
10381387	10425	NM_008061 // G6pc // glucose-6-phosphatase, catalytic // 11 D|11 // 14377 /// ENSMUST00	G6pc	NM_008061	0.425151	-2.35211	SGGFPa6-2010 down vs IFskina6-2010	0.279482	-3.57805	SGGFPa6-2011 down vs IFskina6-2011
10591446	33324	NM_018793 // Tyk2 // tyrosine kinase 2 // 9 A3|9 // 54721 /// ENSMUST00000001036 // Tyk	Tyk2	NM_018793	0.424979	-2.35306	SGGFPa6-2010 down vs IFskina6-2010	0.336063	-2.97563	SGGFPa6-2011 down vs IFskina6-2011
10522875	25597	NM_027128 // Odam // odontogenic, ameloblast asssociated // 5 E2|5 45.0 cM // 69592 ///	Odam	NM_027128	0.424897	-2.35351	SGGFPa6-2010 down vs IFskina6-2010	0.316307	-3.16149	SGGFPa6-2011 down vs IFskina6-2011
10555894	29236	NM_007887 // Dub1 // deubiquitinating enzyme 1 // 7 E3|7 51.5 cM // 13531 /// U41636 //	Dub1	NM_007887	0.424866	-2.35368	SGGFPa6-2010 down vs IFskina6-2010	0.420832	-2.37624	SGGFPa6-2011 down vs IFskina6-2011				Apoptosis
10386238	10933	NM_001171512 // Obscn // obscurin, cytoskeletal calmodulin and titin-interacting RhoGEF	Obscn	NM_001171512	0.424841	-2.35382	SGGFPa6-2010 down vs IFskina6-2010	0.424747	-2.35435	SGGFPa6-2011 down vs IFskina6-2011
10410078	13544	NM_001001321 // Slc35d2 // solute carrier family 35, member D2 // 13 B3|13 // 70484 ///	Slc35d2	NM_001001321	0.424704	-2.35458	SGGFPa6-2010 down vs IFskina6-2010	0.212815	-4.69891	SGGFPa6-2011 down vs IFskina6-2011
10591535	33331	NR_029585 // Mir199a-1 // microRNA 199a-1 // 9|9 // 387194	Mir199a-1	NR_029585	0.424639	-2.35494	SGGFPa6-2010 down vs IFskina6-2010	0.411638	-2.42932	SGGFPa6-2011 down vs IFskina6-2011
10517213	25041	NM_001081047 // Cnksr1 // connector enhancer of kinase suppressor of Ras 1 // 4 D3|4 //	Cnksr1	NM_001081047	0.424624	-2.35502	SGGFPa6-2010 down vs IFskina6-2010	0.373617	-2.67654	SGGFPa6-2011 down vs IFskina6-2011
10465820	19487	NM_010316 // Gng3 // guanine nucleotide binding protein (G protein), gamma 3 // 19 A|19	Gng3	NM_010316	0.424557	-2.3554	SGGFPa6-2010 down vs IFskina6-2010	0.490488	-2.03879	SGGFPa6-2011 down vs IFskina6-2011
10577666	31841	NM_010084 // Adam18 // a disintegrin and metallopeptidase domain 18 // 8|8 A3 // 13524	Adam18	NM_010084	0.424506	-2.35568	SGGFPa6-2010 down vs IFskina6-2010	0.378692	-2.64067	SGGFPa6-2011 down vs IFskina6-2011
10406536	13091	NM_025335 // Tmem167 // transmembrane protein 167 // 13 C3|13 // 66074 /// ENSMUST00000	Tmem167	NM_025335	0.424114	-2.35785	SGGFPa6-2010 down vs IFskina6-2010	0.470264	-2.12646	SGGFPa6-2011 down vs IFskina6-2011
10532517	26555	NM_021351 // Cryba4 // crystallin, beta A4 // 5 F|5 // 12959 /// ENSMUST00000112385 //	Cryba4	NM_021351	0.424107	-2.3579	SGGFPa6-2010 down vs IFskina6-2010	0.42808	-2.33601	SGGFPa6-2011 down vs IFskina6-2011
10410187	13559	NM_175290 // Nlrp4f // NLR family, pyrin domain containing 4F // 13 B3|13 // 97895 ///	Nlrp4f	NM_175290	0.423558	-2.36095	SGGFPa6-2010 down vs IFskina6-2010	0.320564	-3.1195	SGGFPa6-2011 down vs IFskina6-2011
10485747	21642	NM_026248 // 4930430A15Rik // RIKEN cDNA 4930430A15 gene // 2 E3|2 // 67575 /// ENSMUST	4930430A15Rik	NM_026248	0.423241	-2.36272	SGGFPa6-2010 down vs IFskina6-2010	0.378148	-2.64447	SGGFPa6-2011 down vs IFskina6-2011
10523701	25690	NM_008318 // Ibsp // integrin binding sialoprotein // 5 E5|5 56.0 cM // 15891 /// BC045	Ibsp	NM_008318	0.422683	-2.36584	SGGFPa6-2010 down vs IFskina6-2010	0.228063	-4.38475	SGGFPa6-2011 down vs IFskina6-2011
10489589	22002	NM_146129 // Pcif1 // PDX1 C-terminal inhibiting factor 1 // 2 H3|2 // 228866 /// BC031	Pcif1	NM_146129	0.422373	-2.36757	SGGFPa6-2010 down vs IFskina6-2010	0.412028	-2.42702	SGGFPa6-2011 down vs IFskina6-2011
10504422	23650	NM_019473 // Olfr155 // olfactory receptor 155 // 4 B1|4 // 29845 /// ENSMUST0000009510	Olfr155	NM_019473	0.422247	-2.36828	SGGFPa6-2010 down vs IFskina6-2010	0.474172	-2.10894	SGGFPa6-2011 down vs IFskina6-2011
10566192	30530	NM_147109 // Olfr577 // olfactory receptor 577 // 7 E3|7 // 259113 /// ENSMUST000000515	Olfr577	NM_147109	0.422247	-2.36828	SGGFPa6-2010 down vs IFskina6-2010	0.383113	-2.61019	SGGFPa6-2011 down vs IFskina6-2011
10398224	12086	NM_010010 // Cyp46a1 // cytochrome P450, family 46, subfamily a, polypeptide 1 // 12|12	Cyp46a1	NM_010010	0.421993	-2.36971	SGGFPa6-2010 down vs IFskina6-2010	0.463493	-2.15753	SGGFPa6-2011 down vs IFskina6-2011
10508909	24144	XM_003086379 // LOC100503878 // zinc finger protein 683-like // --- // 100503878	LOC100503878	XM_003086379	0.421953	-2.36993	SGGFPa6-2010 down vs IFskina6-2010	0.440039	-2.27252	SGGFPa6-2011 down vs IFskina6-2011
10420479	14753	NM_001004158 // Gm5142 // predicted gene 5142 // 14 C3|14 // 380907 /// ENSMUST00000066	Gm5142	NM_001004158	0.421826	-2.37064	SGGFPa6-2010 down vs IFskina6-2010	0.479045	-2.08749	SGGFPa6-2011 down vs IFskina6-2011
10604106	34822	NM_001033234 // Gm9 // predicted gene 9 // X A3.3|X // 194854 /// ENSMUST00000101636 //	Gm9	NM_001033234	0.421661	-2.37157	SGGFPa6-2010 down vs IFskina6-2010	0.410727	-2.43471	SGGFPa6-2011 down vs IFskina6-2011
10587532	32950	AK085082 // Gm5919 // predicted gene 5919 // 9 E2|9 // 546150	Gm5919	AK085082	0.421657	-2.3716	SGGFPa6-2010 down vs IFskina6-2010	0.363093	-2.75411	SGGFPa6-2011 down vs IFskina6-2011
10577602	31834	NR_030254 // Mir486 // microRNA 486 // 8|8 // 723876	Mir486	NR_030254	0.421615	-2.37183	SGGFPa6-2010 down vs IFskina6-2010	0.419389	-2.38442	SGGFPa6-2011 down vs IFskina6-2011
10591926	33380	NM_001177509 // Gm1110 // predicted gene 1110 // 9 A4|9 // 382064 /// ENSMUST0000011526	Gm1110	NM_001177509	0.421359	-2.37327	SGGFPa6-2010 down vs IFskina6-2010	0.437719	-2.28457	SGGFPa6-2011 down vs IFskina6-2011
10484618	21435	NM_207564 // Olfr1083 // olfactory receptor 1083 // 2 D|2 // 404326	Olfr1083	NM_207564	0.420319	-2.37914	SGGFPa6-2010 down vs IFskina6-2010	0.388786	-2.57211	SGGFPa6-2011 down vs IFskina6-2011
10454856	18336	NM_028707 // Psd2 // pleckstrin and Sec7 domain containing 2 // 18 B2|18 // 74002 /// E	Psd2	NM_028707	0.4203	-2.37925	SGGFPa6-2010 down vs IFskina6-2010	0.308978	-3.23648	SGGFPa6-2011 down vs IFskina6-2011
10466182	19526	NM_183190 // Ms4a5 // membrane-spanning 4-domains, subfamily A, member 5 // 19 A|19 //	Ms4a5	NM_183190	0.419689	-2.38271	SGGFPa6-2010 down vs IFskina6-2010	0.34096	-2.9329	SGGFPa6-2011 down vs IFskina6-2011
10395428	11808	NM_178681 // Dgkb // diacylglycerol kinase, beta // 12 A3|12 // 217480 /// ENSMUST00000	Dgkb	NM_178681	0.419419	-2.38425	SGGFPa6-2010 down vs IFskina6-2010	0.399911	-2.50056	SGGFPa6-2011 down vs IFskina6-2011				Apoptosis/Txn
10522961	25609	NM_017468 // Enam // enamelin // 5|5 E2 // 13801 /// ENSMUST00000031222 // Enam // enam	Enam	NM_017468	0.418954	-2.3869	SGGFPa6-2010 down vs IFskina6-2010	0.443687	-2.25384	SGGFPa6-2011 down vs IFskina6-2011
10592380	33434	NM_146440 // Olfr919 // olfactory receptor 919 // 9 A5|9 // 258432 /// ENSMUST000000714	Olfr919	NM_146440	0.418768	-2.38796	SGGFPa6-2010 down vs IFskina6-2010	0.470276	-2.12641	SGGFPa6-2011 down vs IFskina6-2011
10375572	9841	NM_001011790 // Olfr1382 // olfactory receptor 1382 // 11 B1.2|11 // 257971 /// ENSMUST	Olfr1382	NM_001011790	0.418605	-2.38889	SGGFPa6-2010 down vs IFskina6-2010	0.498403	-2.00641	SGGFPa6-2011 down vs IFskina6-2011
10473523	20315	NM_207632 // Olfr1118-ps // olfactory receptor 1118, pseudogene // 2 D|2 // 404328 ///	Olfr1118-ps	NM_207632	0.41845	-2.38977	SGGFPa6-2010 down vs IFskina6-2010	0.258062	-3.87504	SGGFPa6-2011 down vs IFskina6-2011
10525833	25879	BC112905 // Atp6v0a2 // ATPase, H+ transporting, lysosomal V0 subunit A2 // 5 F|5 // 21	Atp6v0a2	BC112905	0.418392	-2.3901	SGGFPa6-2010 down vs IFskina6-2010	0.324817	-3.07865	SGGFPa6-2011 down vs IFskina6-2011
10386205	10926	NM_146376 // Olfr323 // olfactory receptor 323 // 11 B1|11 // 258373 /// ENSMUST0000007	Olfr323	NM_146376	0.418003	-2.39233	SGGFPa6-2010 down vs IFskina6-2010	0.301347	-3.31843	SGGFPa6-2011 down vs IFskina6-2011
10571808	31256	NM_133711 // Spata4 // spermatogenesis associated 4 // 8|8 B3.1 // 69281 /// ENSMUST000	Spata4	NM_133711	0.417381	-2.39589	SGGFPa6-2010 down vs IFskina6-2010	0.197466	-5.06418	SGGFPa6-2011 down vs IFskina6-2011
10526880	25992	ENSMUST00000110897 // Pdgfa // platelet derived growth factor, alpha // 5 G2|5 82.0 cM	Pdgfa	ENSMUST00000110897	0.417248	-2.39666	SGGFPa6-2010 down vs IFskina6-2010	0.305768	-3.27045	SGGFPa6-2011 down vs IFskina6-2011
10538142	27127	NM_175035 // Gimap5 // GTPase, IMAP family member 5 // 6 B2.3|6 // 317757 /// ENSMUST00	Gimap5	NM_175035	0.417207	-2.39689	SGGFPa6-2010 down vs IFskina6-2010	0.413196	-2.42016	SGGFPa6-2011 down vs IFskina6-2011
10596904	33896	NM_001135198 // Ccdc36 // coiled-coil domain containing 36 // 9 F2|9 // 434438 /// ENSM	Ccdc36	NM_001135198	0.416626	-2.40023	SGGFPa6-2010 down vs IFskina6-2010	0.244291	-4.09349	SGGFPa6-2011 down vs IFskina6-2011
10505914	23847	NM_153102 // Zfp352 // zinc finger protein 352 // 4 C5|4 // 236537 /// ENSMUST000001071	Zfp352	NM_153102	0.415988	-2.40392	SGGFPa6-2010 down vs IFskina6-2010	0.470264	-2.12646	SGGFPa6-2011 down vs IFskina6-2011
10370046	9281	ENSMUST00000059658 // Gm867 // predicted gene 867 // 10 C1|10 // 333670	Gm867	ENSMUST00000059658	0.415885	-2.40451	SGGFPa6-2010 down vs IFskina6-2010	0.38589	-2.59141	SGGFPa6-2011 down vs IFskina6-2011
10357788	7924	NM_133819 // Ppp1r15b // protein phosphatase 1, regulatory (inhibitor) subunit 15b // 1	Ppp1r15b	NM_133819	0.415853	-2.4047	SGGFPa6-2010 down vs IFskina6-2010	0.432632	-2.31144	SGGFPa6-2011 down vs IFskina6-2011
10580593	32160	NM_001013764 // Ces1a // carboxylesterase 1A // 8 C5|8 // 244595 /// ENSMUST00000095211	Ces1a	NM_001013764	0.414696	-2.41141	SGGFPa6-2010 down vs IFskina6-2010	0.374516	-2.67012	SGGFPa6-2011 down vs IFskina6-2011
10601607	34523	NR_003646 // 4921511C20Rik // high density lipoprotein (HDL) binding protein pseudogene	4921511C20Rik	NR_003646	0.414512	-2.41248	SGGFPa6-2010 down vs IFskina6-2010	0.440419	-2.27057	SGGFPa6-2011 down vs IFskina6-2011
10539316	27283	NM_010692 // Lbx2 // ladybird homeobox homolog 2 (Drosophila) // 6 C3|6 35.0 cM // 1681	Lbx2	NM_010692	0.413989	-2.41552	SGGFPa6-2010 down vs IFskina6-2010	0.332081	-3.01132	SGGFPa6-2011 down vs IFskina6-2011
10491699	22231	NM_008006 // Fgf2 // fibroblast growth factor 2 // 3 A2-B|3 19.3 cM // 14173 /// ENSMUS	Fgf2	NM_008006	0.413828	-2.41646	SGGFPa6-2010 down vs IFskina6-2010	0.253935	-3.93802	SGGFPa6-2011 down vs IFskina6-2011				Notch Signaling Pathway
10440711	16862	D86421 // Gm10228 // predicted gene 10228 // 16 C3.3|16 // 100040214	Gm10228	D86421	0.413828	-2.41646	SGGFPa6-2010 down vs IFskina6-2010	0.435717	-2.29507	SGGFPa6-2011 down vs IFskina6-2011
10604169	34836	NM_001025083 // Rhox12 // reproductive homeobox 12 // X A3.3|X // 382282 /// ENSMUST000	Rhox12	NM_001025083	0.413828	-2.41646	SGGFPa6-2010 down vs IFskina6-2010	0.370825	-2.69669	SGGFPa6-2011 down vs IFskina6-2011
10409924	13525	NM_019541 // Cts8 // cathepsin 8 // 13 B2|13 // 56094 /// ENSMUST00000021891 // Cts8 //	Cts8	NM_019541	0.413683	-2.41731	SGGFPa6-2010 down vs IFskina6-2010	0.232912	-4.29347	SGGFPa6-2011 down vs IFskina6-2011
10501026	23270	NM_145126 // Chi3l4 // chitinase 3-like 4 // 3 F2.2|3 // 104183 /// ENSMUST00000082219	Chi3l4	NM_145126	0.413418	-2.41886	SGGFPa6-2010 down vs IFskina6-2010	0.196596	-5.08658	SGGFPa6-2011 down vs IFskina6-2011
10440166	16768	NM_146779 // Olfr196 // olfactory receptor 196 // 16 C2|16 // 258775 /// ENSMUST0000007	Olfr196	NM_146779	0.412941	-2.42165	SGGFPa6-2010 down vs IFskina6-2010	0.217392	-4.59999	SGGFPa6-2011 down vs IFskina6-2011
10440329	16793	AK038707 // 9330155M09Rik // RIKEN cDNA 9330155M09 gene // 16 C2|16 // 320756	9330155M09Rik	AK038707	0.412504	-2.42422	SGGFPa6-2010 down vs IFskina6-2010	0.430627	-2.32219	SGGFPa6-2011 down vs IFskina6-2011
10548396	28304	NM_021378 // Klrc3 // killer cell lectin-like receptor subfamily C, member 3 // 6 F3|6	Klrc3	NM_021378	0.411524	-2.42999	SGGFPa6-2010 down vs IFskina6-2010	0.179409	-5.57386	SGGFPa6-2011 down vs IFskina6-2011
10414958	14124	ENSMUST00000103656 // Tcra-V8 // T-cell receptor alpha, variable 8 // 14 C2|14 19.7 cM	Tcra-V8	ENSMUST00000103656	0.411356	-2.43099	SGGFPa6-2010 down vs IFskina6-2010	0.25948	-3.85386	SGGFPa6-2011 down vs IFskina6-2011
10354753	7642	NM_029267 // Boll // bol, boule-like (Drosophila) // 1|1 C1 // 75388 /// NM_001113367 /	Boll	NM_029267	0.410562	-2.43568	SGGFPa6-2010 down vs IFskina6-2010	0.367465	-2.72135	SGGFPa6-2011 down vs IFskina6-2011
10480468	21070	NM_199059 // Tbpl2 // TATA box binding protein like 2 // 2 A3|2 // 227606 /// ENSMUST00	Tbpl2	NM_199059	0.410562	-2.43568	SGGFPa6-2010 down vs IFskina6-2010	0.236398	-4.23016	SGGFPa6-2011 down vs IFskina6-2011
10497463	22848	NM_029706 // Cpb1 // carboxypeptidase B1 (tissue) // 3 A2|3 13.0 cM // 76703 /// ENSMUS	Cpb1	NM_029706	0.41056	-2.4357	SGGFPa6-2010 down vs IFskina6-2010	0.357567	-2.79668	SGGFPa6-2011 down vs IFskina6-2011
10478355	20842	NM_008652 // Mybl2 // myeloblastosis oncogene-like 2 // 2 H2|2 93.0 cM // 17865 /// ENS	Mybl2	NM_008652	0.410524	-2.43591	SGGFPa6-2010 down vs IFskina6-2010	0.482837	-2.07109	SGGFPa6-2011 down vs IFskina6-2011				Cell Junction
10428515	15571	NM_001081391 // Csmd3 // CUB and Sushi multiple domains 3 // 15|15 D1 // 239420 /// ENS	Csmd3	NM_001081391	0.409911	-2.43955	SGGFPa6-2010 down vs IFskina6-2010	0.273545	-3.65571	SGGFPa6-2011 down vs IFskina6-2011
10571891	31271	NM_011834 // Aadat // aminoadipate aminotransferase // 8 B3.1|8 31.5 cM // 23923 /// EN	Aadat	NM_011834	0.409628	-2.44124	SGGFPa6-2010 down vs IFskina6-2010	0.273467	-3.65675	SGGFPa6-2011 down vs IFskina6-2011
10536334	26940	NM_001191023 // Dync1i1 // dynein cytoplasmic 1 intermediate chain 1 // 6 A1|6 3.8 cM /	Dync1i1	NM_001191023	0.409199	-2.4438	SGGFPa6-2010 down vs IFskina6-2010	0.350578	-2.85244	SGGFPa6-2011 down vs IFskina6-2011
10438220	16541	NM_030558 // Car15 // carbonic anhydrase 15 // 16 A3|16 10.36 cM // 80733 /// ENSMUST00	Car15	NM_030558	0.408449	-2.44828	SGGFPa6-2010 down vs IFskina6-2010	0.487266	-2.05227	SGGFPa6-2011 down vs IFskina6-2011				Cell Junction/Receptor
10368021	9051	NM_029722 // Gje1 // gap junction protein, epsilon 1 // 10 A2|10 // 76743	Gje1	NM_029722	0.407585	-2.45348	SGGFPa6-2010 down vs IFskina6-2010	0.289273	-3.45695	SGGFPa6-2011 down vs IFskina6-2011
10545030	27913	NM_053238 // Vmn1r25 // vomeronasal 1 receptor 25 // 6 B3|6 // 113865 /// ENSMUST000000	Vmn1r25	NM_053238	0.407191	-2.45585	SGGFPa6-2010 down vs IFskina6-2010	0.40228	-2.48583	SGGFPa6-2011 down vs IFskina6-2011
10360370	8229	NM_001024721 // BC094916 // cDNA sequence BC094916 // 1 H3|1 // 545384 /// ENSMUST00000	BC094916	NM_001024721	0.406683	-2.45892	SGGFPa6-2010 down vs IFskina6-2010	0.46701	-2.14128	SGGFPa6-2011 down vs IFskina6-2011
10495193	22611	NM_008417 // Kcna2 // potassium voltage-gated channel, shaker-related subfamily, member	Kcna2	NM_008417	0.406539	-2.45979	SGGFPa6-2010 down vs IFskina6-2010	0.436352	-2.29173	SGGFPa6-2011 down vs IFskina6-2011
10445006	17284	NR_033619 // Gm6623 // akirin 1 pseudogene // 17 B1|17 // 625785 /// NM_023423 // Akiri	Gm6623	NR_033619	0.406291	-2.46129	SGGFPa6-2010 down vs IFskina6-2010	0.462715	-2.16116	SGGFPa6-2011 down vs IFskina6-2011
10437055	16430	NM_011377 // Sim2 // single-minded homolog 2 (Drosophila) // 16 C3.3-C4|16 67.57 cM //	Sim2	NM_011377	0.405854	-2.46394	SGGFPa6-2010 down vs IFskina6-2010	0.454196	-2.20169	SGGFPa6-2011 down vs IFskina6-2011
10579114	32005	BC028663 // Yjefn3 // YjeF N-terminal domain containing 3 // 8 B3.3|8 // 234365	Yjefn3	BC028663	0.405758	-2.46452	SGGFPa6-2010 down vs IFskina6-2010	0.378431	-2.64249	SGGFPa6-2011 down vs IFskina6-2011				Phosphate Transport
10438668	16594	NM_009967 // Crygs // crystallin, gamma S // 16 B1|16 16.1 cM // 12970 /// ENSMUST00000	Crygs	NM_009967	0.405678	-2.46501	SGGFPa6-2010 down vs IFskina6-2010	0.39199	-2.55109	SGGFPa6-2011 down vs IFskina6-2011
10467410	19676	NM_145499 // Cyp2c70 // cytochrome P450, family 2, subfamily c, polypeptide 70 // 19 C3	Cyp2c70	NM_145499	0.405678	-2.46501	SGGFPa6-2010 down vs IFskina6-2010	0.407379	-2.45472	SGGFPa6-2011 down vs IFskina6-2011
10484537	21395	NM_146573 // Olfr1002 // olfactory receptor 1002 // 2 E1|2 // 258566 /// ENSMUST0000009	Olfr1002	NM_146573	0.405575	-2.46564	SGGFPa6-2010 down vs IFskina6-2010	0.334129	-2.99286	SGGFPa6-2011 down vs IFskina6-2011
10593347	33543	NM_025687 // Tex12 // testis expressed gene 12 // 9 A5.3|9 // 66654 /// ENSMUST00000034	Tex12	NM_025687	0.405424	-2.46655	SGGFPa6-2010 down vs IFskina6-2010	0.33321	-3.00111	SGGFPa6-2011 down vs IFskina6-2011				Cell Junction/Ion Transport
10564266	30311	NM_013788 // Peg12 // paternally expressed 12 // 7 C|7 28.0 cM // 27412 /// ENSMUST0000	Peg12	NM_013788	0.405053	-2.46881	SGGFPa6-2010 down vs IFskina6-2010	0.430219	-2.3244	SGGFPa6-2011 down vs IFskina6-2011				Ion/Copper Transport
10376324	9922	NM_001135115 // Gm12250 // predicted gene 12250 // 11 B1.3|11 // 631323 /// DQ508487 //	Gm12250	NM_001135115	0.404672	-2.47114	SGGFPa6-2010 down vs IFskina6-2010	0.391694	-2.55301	SGGFPa6-2011 down vs IFskina6-2011
10473312	20260	NM_175514 // Fam171b // family with sequence similarity 171, member B // 2 D|2 // 24152	Fam171b	NM_175514	0.404491	-2.47224	SGGFPa6-2010 down vs IFskina6-2010	0.389071	-2.57022	SGGFPa6-2011 down vs IFskina6-2011				Sugar Transport
10446066	17429	ENSMUST00000070225 // A230051N06Rik // RIKEN cDNA A230051N06 gene // 17 D|17 // 320593	A230051N06Rik	ENSMUST00000070225	0.403318	-2.47943	SGGFPa6-2010 down vs IFskina6-2010	0.41314	-2.42049	SGGFPa6-2011 down vs IFskina6-2011				Sugar Transport
10352377	7405	ENSMUST00000060610 // Dnahc14 // dynein, axonemal, heavy chain 14 // 1 H5|1 // 240960	Dnahc14	ENSMUST00000060610	0.402589	-2.48392	SGGFPa6-2010 down vs IFskina6-2010	0.236001	-4.23726	SGGFPa6-2011 down vs IFskina6-2011				Ion Transport/Signal
10566417	30599	NM_001011848 // Olfr675 // olfactory receptor 675 // 7 E3|7 // 258147 /// ENSMUST000000	Olfr675	NM_001011848	0.402279	-2.48584	SGGFPa6-2010 down vs IFskina6-2010	0.326206	-3.06555	SGGFPa6-2011 down vs IFskina6-2011
10464413	19358	ENSMUST00000099267 // Gm10751 // predicted gene 10751 // --- // 100048898	Gm10751	ENSMUST00000099267	0.402083	-2.48705	SGGFPa6-2010 down vs IFskina6-2010	0.37191	-2.68882	SGGFPa6-2011 down vs IFskina6-2011
10568496	30877	BC115646 // 4933402N03Rik // RIKEN cDNA 4933402N03 gene // 7|7 F4 // 233918 /// ENSMUST	4933402N03Rik	BC115646	0.401692	-2.48947	SGGFPa6-2010 down vs IFskina6-2010	0.366029	-2.73202	SGGFPa6-2011 down vs IFskina6-2011
10532999	26623	NM_001167691 // Sirt4 // sirtuin 4 (silent mating type information regulation 2 homolog	Sirt4	NM_001167691	0.401154	-2.49281	SGGFPa6-2010 down vs IFskina6-2010	0.417476	-2.39535	SGGFPa6-2011 down vs IFskina6-2011
10419442	14630	NM_146278 // Olfr729 // olfactory receptor 729 // 14 C3-D1|14 // 258275 /// ENSMUST0000	Olfr729	NM_146278	0.401071	-2.49333	SGGFPa6-2010 down vs IFskina6-2010	0.272515	-3.66953	SGGFPa6-2011 down vs IFskina6-2011
10364441	8685	NM_001104537 // Vmn2r83 // vomeronasal 2, receptor 83 // 10 C1|10 // 625029	Vmn2r83	NM_001104537	0.400699	-2.49564	SGGFPa6-2010 down vs IFskina6-2010	0.328195	-3.04697	SGGFPa6-2011 down vs IFskina6-2011
10513103	24577	NM_001142965 // 6430704M03Rik // RIKEN cDNA 6430704M03 gene // 4 B3|4 // 230235 /// ENS	6430704M03Rik	NM_001142965	0.400631	-2.49606	SGGFPa6-2010 down vs IFskina6-2010	0.27308	-3.66193	SGGFPa6-2011 down vs IFskina6-2011
10551236	28684	NM_172896 // Nlrp4a // NLR family, pyrin domain containing 4A // 7 A3|7 // 243880 /// E	Nlrp4a	NM_172896	0.400509	-2.49682	SGGFPa6-2010 down vs IFskina6-2010	0.233919	-4.27498	SGGFPa6-2011 down vs IFskina6-2011				Cell Junction
10373756	9644	NM_172791 // Pla2g3 // phospholipase A2, group III // 11 A1|11 // 237625 /// ENSMUST000	Pla2g3	NM_172791	0.400222	-2.49861	SGGFPa6-2010 down vs IFskina6-2010	0.396258	-2.52361	SGGFPa6-2011 down vs IFskina6-2011
10403023	12645	ENSMUST00000103517 // Gm7016 // predicted gene 7016 // 12 F2|12 // 629908	Gm7016	ENSMUST00000103517	0.400042	-2.49974	SGGFPa6-2010 down vs IFskina6-2010	0.326448	-3.06327	SGGFPa6-2011 down vs IFskina6-2011				Txn/Protein Transport
10537306	27030	NM_145364 // Akr1d1 // aldo-keto reductase family 1, member D1 // 6 B1|6 // 208665 ///	Akr1d1	NM_145364	0.399924	-2.50047	SGGFPa6-2010 down vs IFskina6-2010	0.434623	-2.30084	SGGFPa6-2011 down vs IFskina6-2011
10556828	29348	NM_028085 // Anks4b // ankyrin repeat and sterile alpha motif domain containing 4B // 7	Anks4b	NM_028085	0.399847	-2.50096	SGGFPa6-2010 down vs IFskina6-2010	0.356946	-2.80154	SGGFPa6-2011 down vs IFskina6-2011
10381960	10485	ENSMUST00000019734 // Cyb561 // cytochrome b-561 // 11 E1|11 65.0 cM // 13056 /// ENSMU	Cyb561	ENSMUST00000019734	0.399134	-2.50542	SGGFPa6-2010 down vs IFskina6-2010	0.495261	-2.01914	SGGFPa6-2011 down vs IFskina6-2011
10382502	10536	NM_001080929 // Cdr2l // cerebellar degeneration-related protein 2-like // 11 E2|11 //	Cdr2l	NM_001080929	0.398894	-2.50693	SGGFPa6-2010 down vs IFskina6-2010	0.476898	-2.09688	SGGFPa6-2011 down vs IFskina6-2011
10419559	14649	NM_001011875 // Rnase12 // ribonuclease, RNase A family, 12 (non-active) // 14|14 B-C1	Rnase12	NM_001011875	0.398884	-2.50699	SGGFPa6-2010 down vs IFskina6-2010	0.458119	-2.18284	SGGFPa6-2011 down vs IFskina6-2011
10441858	16966	NM_013741 // Smok2a // sperm motility kinase 2A // 17 A1|17 // 27263 /// ENSMUST0000008	Smok2a	NM_013741	0.398597	-2.5088	SGGFPa6-2010 down vs IFskina6-2010	0.491097	-2.03626	SGGFPa6-2011 down vs IFskina6-2011
10578408	31921	NM_001009547 // Adam26b // a disintegrin and metallopeptidase domain 26B // 8 A4|8 // 3	Adam26b	NM_001009547	0.39842	-2.50992	SGGFPa6-2010 down vs IFskina6-2010	0.367801	-2.71886	SGGFPa6-2011 down vs IFskina6-2011
10553057	28924	NM_172418 // Mamstr // MEF2 activating motif and SAP domain containing transcriptional	Mamstr	NM_172418	0.398391	-2.5101	SGGFPa6-2010 down vs IFskina6-2010	0.451088	-2.21686	SGGFPa6-2011 down vs IFskina6-2011
10455065	18356	NM_053130 // Pcdhb5 // protocadherin beta 5 // 18 B3|18 // 93876 /// ENSMUST00000078271	Pcdhb5	NM_053130	0.398391	-2.5101	SGGFPa6-2010 down vs IFskina6-2010	0.42141	-2.37299	SGGFPa6-2011 down vs IFskina6-2011
10585410	32756	NM_173778 // Sh2d7 // SH2 domain containing 7 // 9 A5.3|9 // 244885 /// ENSMUST00000060	Sh2d7	NM_173778	0.39808	-2.51206	SGGFPa6-2010 down vs IFskina6-2010	0.480671	-2.08042	SGGFPa6-2011 down vs IFskina6-2011
10601447	34485	NM_001163104 // Fam46d // family with sequence similarity 46, member D // X D|X // 2134	Fam46d	NM_001163104	0.397702	-2.51444	SGGFPa6-2010 down vs IFskina6-2010	0.409152	-2.44408	SGGFPa6-2011 down vs IFskina6-2011
10554397	29043	NM_177765 // Ttll13 // tubulin tyrosine ligase-like family, member 13 // 7 D3|7 // 2699	Ttll13	NM_177765	0.397475	-2.51588	SGGFPa6-2010 down vs IFskina6-2010	0.444062	-2.25194	SGGFPa6-2011 down vs IFskina6-2011
10419356	14614	NM_144841 // Otx2 // orthodenticle homolog 2 (Drosophila) // 14 C1|14 19.0 cM // 18424	Otx2	NM_144841	0.396714	-2.52071	SGGFPa6-2010 down vs IFskina6-2010	0.437398	-2.28625	SGGFPa6-2011 down vs IFskina6-2011				Wnt Sig Path
10606820	35193	NM_027952 // 1700008I05Rik // RIKEN cDNA 1700008I05 gene // X F1|X // 71841 /// ENSMUST	1700008I05Rik	NM_027952	0.396352	-2.52301	SGGFPa6-2010 down vs IFskina6-2010	0.470276	-2.12641	SGGFPa6-2011 down vs IFskina6-2011
10419553	14647	NM_183032 // Rnase9 // ribonuclease, RNase A family, 9 (non-active) // 14|14 B-C1 // 32	Rnase9	NM_183032	0.396352	-2.52301	SGGFPa6-2010 down vs IFskina6-2010	0.438687	-2.27953	SGGFPa6-2011 down vs IFskina6-2011
10536738	26980	NM_028957 // Hyal5 // hyaluronoglucosaminidase 5 // 6 A3.1|6 // 74468 /// ENSMUST000000	Hyal5	NM_028957	0.395461	-2.52869	SGGFPa6-2010 down vs IFskina6-2010	0.325629	-3.07098	SGGFPa6-2011 down vs IFskina6-2011
10545874	28045	NM_023493 // Cml5 // camello-like 5 // 6 C3|6 // 69049 /// ENSMUST00000032074 // Cml5 /	Cml5	NM_023493	0.39519	-2.53043	SGGFPa6-2010 down vs IFskina6-2010	0.224421	-4.4559	SGGFPa6-2011 down vs IFskina6-2011
10400706	12405	ENSMUST00000050063 // Arf6 // ADP-ribosylation factor 6 // 12 C2|12 // 11845 /// BC0831	Arf6	ENSMUST00000050063	0.394946	-2.53199	SGGFPa6-2010 down vs IFskina6-2010	0.320652	-3.11864	SGGFPa6-2011 down vs IFskina6-2011				ECM
10548146	28282	NM_011567 // Tead4 // TEA domain family member 4 // 6 F3|6 61.3 cM // 21679 /// NM_0010	Tead4	NM_011567	0.393554	-2.54095	SGGFPa6-2010 down vs IFskina6-2010	0.173192	-5.77395	SGGFPa6-2011 down vs IFskina6-2011
10499751	23105	NM_030080 // Creb3l4 // cAMP responsive element binding protein 3-like 4 // 3 F1|3 // 7	Creb3l4	NM_030080	0.393535	-2.54107	SGGFPa6-2010 down vs IFskina6-2010	0.317173	-3.15285	SGGFPa6-2011 down vs IFskina6-2011				Keratinization
10548957	28388	NM_054066 // Plcz1 // phospholipase C, zeta 1 // 6|6 G1 // 114875 /// ENSMUST0000003235	Plcz1	NM_054066	0.39333	-2.5424	SGGFPa6-2010 down vs IFskina6-2010	0.478257	-2.09092	SGGFPa6-2011 down vs IFskina6-2011
10566245	30554	NM_013621 // Olfr69 // olfactory receptor 69 // 7 E3|7 // 18370 /// ENSMUST00000080910	Olfr69	NM_013621	0.392683	-2.54658	SGGFPa6-2010 down vs IFskina6-2010	0.258542	-3.86785	SGGFPa6-2011 down vs IFskina6-2011
10471567	20060	AK147796 // C130021I20Rik // Riken cDNA C130021I20 gene // 2 B|2 // 329385 /// XR_10467	C130021I20Rik	AK147796	0.392383	-2.54853	SGGFPa6-2010 down vs IFskina6-2010	0.484356	-2.0646	SGGFPa6-2011 down vs IFskina6-2011
10411223	13678	NM_001081159 // S100z // S100 calcium binding protein, zeta // 13 D1|13 // 268686 /// E	S100z	NM_001081159	0.392272	-2.54925	SGGFPa6-2010 down vs IFskina6-2010	0.397293	-2.51703	SGGFPa6-2011 down vs IFskina6-2011
10587616	32959	NM_178738 // Prss35 // protease, serine, 35 // 9 E3.1|9 // 244954 /// ENSMUST0000003642	Prss35	NM_178738	0.391879	-2.55181	SGGFPa6-2010 down vs IFskina6-2010	0.438977	-2.27802	SGGFPa6-2011 down vs IFskina6-2011
10499909	23128	NM_001166172 // Lce6a // late cornified envelope 6A // 3|3 // 78382	Lce6a	NM_001166172	0.391429	-2.55474	SGGFPa6-2010 down vs IFskina6-2010	0.461114	-2.16866	SGGFPa6-2011 down vs IFskina6-2011
10546339	28099	NM_009527 // Wnt7a // wingless-related MMTV integration site 7A // 6 D1|6 39.5 cM // 22	Wnt7a	NM_009527	0.390983	-2.55766	SGGFPa6-2010 down vs IFskina6-2010	0.326472	-3.06305	SGGFPa6-2011 down vs IFskina6-2011
10399549	12260	ENSMUST00000095823 // 2410004P03Rik // RIKEN cDNA 2410004P03 gene // 12 A1.1|12 // 7366	2410004P03Rik	ENSMUST00000095823	0.39069	-2.55958	SGGFPa6-2010 down vs IFskina6-2010	0.3835	-2.60756	SGGFPa6-2011 down vs IFskina6-2011
10388276	11110	NM_146443 // Olfr382 // olfactory receptor 382 // 11 B4|11 // 258435 /// ENSMUST0000009	Olfr382	NM_146443	0.389664	-2.56631	SGGFPa6-2010 down vs IFskina6-2010	0.12888	-7.75913	SGGFPa6-2011 down vs IFskina6-2011
10378420	10118	NM_001177570 // Zfp616 // zinc finger protein 616 // 11 B4|11 // 327963	Zfp616	NM_001177570	0.389247	-2.56906	SGGFPa6-2010 down vs IFskina6-2010	0.286374	-3.49194	SGGFPa6-2011 down vs IFskina6-2011
10573319	31410	NM_001013384 // Podnl1 // podocan-like 1 // 8 C3|8 // 244550 /// DQ303463 // Podnl1 //	Podnl1	NM_001013384	0.388913	-2.57127	SGGFPa6-2010 down vs IFskina6-2010	0.480686	-2.08036	SGGFPa6-2011 down vs IFskina6-2011
10473616	20357	NM_146463 // Olfr1204 // olfactory receptor 1204 // 2 E1|2 // 258455 /// ENSMUST0000007	Olfr1204	NM_146463	0.388709	-2.57262	SGGFPa6-2010 down vs IFskina6-2010	0.354047	-2.82448	SGGFPa6-2011 down vs IFskina6-2011				Apoptosis
10460010	18874	NM_008082 // Galr1 // galanin receptor 1 // 18 E3-E4|18 55.0 cM // 14427 /// ENSMUST000	Galr1	NM_008082	0.387673	-2.57949	SGGFPa6-2010 down vs IFskina6-2010	0.455183	-2.19692	SGGFPa6-2011 down vs IFskina6-2011				Microtubule
10345675	6754	NM_008719 // Npas2 // neuronal PAS domain protein 2 // 1 B|1 20.0 cM // 18143 /// ENSMU	Npas2	NM_008719	0.387646	-2.57967	SGGFPa6-2010 down vs IFskina6-2010	0.337365	-2.96415	SGGFPa6-2011 down vs IFskina6-2011
10395324	11798	NM_029294 // Prps1l1 // phosphoribosyl pyrophosphate synthetase 1-like 1 // 12 A3|12 //	Prps1l1	NM_029294	0.387646	-2.57967	SGGFPa6-2010 down vs IFskina6-2010	0.498515	-2.00596	SGGFPa6-2011 down vs IFskina6-2011				Receptor
10552299	28821	NM_183166 // Gm4884 // predicted gene 4884 // 7 B3|7 // 233164 /// ENSMUST00000050375 /	Gm4884	NM_183166	0.386567	-2.58687	SGGFPa6-2010 down vs IFskina6-2010	0.425387	-2.3508	SGGFPa6-2011 down vs IFskina6-2011
10372324	9478	NM_009306 // Syt1 // synaptotagmin I // 10 D1|10 58.0 cM // 20979 /// ENSMUST0000010527	Syt1	NM_009306	0.386266	-2.58889	SGGFPa6-2010 down vs IFskina6-2010	0.458165	-2.18262	SGGFPa6-2011 down vs IFskina6-2011
10368700	9143	NM_001173500 // G630090E17Rik // RIKEN cDNA G630090E17 gene // 10 B1|10 // 100041085 //	G630090E17Rik	NM_001173500	0.385429	-2.59451	SGGFPa6-2010 down vs IFskina6-2010	0.270002	-3.70368	SGGFPa6-2011 down vs IFskina6-2011
10419284	14606	ENSMUST00000074862 // Gm10101 // predicted gene 10101 // 14 B|14 // 328388	Gm10101	ENSMUST00000074862	0.385241	-2.59578	SGGFPa6-2010 down vs IFskina6-2010	0.455447	-2.19564	SGGFPa6-2011 down vs IFskina6-2011
10514919	24779	NM_019872 // Dmrtb1 // DMRT-like family B with proline-rich C-terminal, 1 // 4 C7|4 //	Dmrtb1	NM_019872	0.38519	-2.59612	SGGFPa6-2010 down vs IFskina6-2010	0.359448	-2.78204	SGGFPa6-2011 down vs IFskina6-2011
10548422	28308	NM_177155 // Klri2 // killer cell lectin-like receptor family I member 2 // 6 F3|6 // 3	Klri2	NM_177155	0.385107	-2.59668	SGGFPa6-2010 down vs IFskina6-2010	0.33321	-3.00111	SGGFPa6-2011 down vs IFskina6-2011
10345028	6681	NR_029593 // Mir206 // microRNA 206 // 1|1 // 387202	Mir206	NR_029593	0.385107	-2.59668	SGGFPa6-2010 down vs IFskina6-2010	0.309716	-3.22876	SGGFPa6-2011 down vs IFskina6-2011
10515159	24810	NM_008593 // Foxd2 // forkhead box D2 // 4 D1|4 56.5 cM // 17301 /// ENSMUST00000068654	Foxd2	NM_008593	0.384293	-2.60218	SGGFPa6-2010 down vs IFskina6-2010	0.325222	-3.07482	SGGFPa6-2011 down vs IFskina6-2011
10542953	27681	NM_009364 // Tfpi2 // tissue factor pathway inhibitor 2 // 6 A2|6 1.0 cM // 21789 /// E	Tfpi2	NM_009364	0.384236	-2.60257	SGGFPa6-2010 down vs IFskina6-2010	0.444062	-2.25194	SGGFPa6-2011 down vs IFskina6-2011
10586614	32882	NM_001081314 // C2cd4b // C2 calcium-dependent domain containing 4B // 9|9 D // 75697 /	C2cd4b	NM_001081314	0.383606	-2.60684	SGGFPa6-2010 down vs IFskina6-2010	0.40329	-2.4796	SGGFPa6-2011 down vs IFskina6-2011
10555758	29186	NM_147053 // Olfr582 // olfactory receptor 582 // 7 E3|7 // 259055 /// ENSMUST000000982	Olfr582	NM_147053	0.383019	-2.61083	SGGFPa6-2010 down vs IFskina6-2010	0.319972	-3.12527	SGGFPa6-2011 down vs IFskina6-2011
10601848	34550	NM_029541 // 6530401D17Rik // RIKEN cDNA 6530401D17 gene // X F1|X // 76219	6530401D17Rik	NM_029541	0.382853	-2.61197	SGGFPa6-2010 down vs IFskina6-2010	0.282248	-3.54298	SGGFPa6-2011 down vs IFskina6-2011				Cell Cycle/Txn
10352354	7401	ENSMUST00000066988 // A430110L20Rik // RIKEN cDNA A430110L20 gene // 1 H5|1 // 329307	A430110L20Rik	ENSMUST00000066988	0.382164	-2.61668	SGGFPa6-2010 down vs IFskina6-2010	0.450461	-2.21995	SGGFPa6-2011 down vs IFskina6-2011
10602251	34596	NM_001195579 // Gm15070 // predicted gene 15070 // X|X // 100038527	Gm15070	NM_001195579	0.381368	-2.62214	SGGFPa6-2010 down vs IFskina6-2010	0.388722	-2.57253	SGGFPa6-2011 down vs IFskina6-2011
10456392	18494	NM_007702 // Cidea // cell death-inducing DNA fragmentation factor, alpha subunit-like	Cidea	NM_007702	0.380975	-2.62484	SGGFPa6-2010 down vs IFskina6-2010	0.420631	-2.37738	SGGFPa6-2011 down vs IFskina6-2011
10371288	9384	AY702028 // Gm1553 // predicted gene 1553 // 10 C1|10 // 432480 /// ENSMUST00000092267	Gm1553	AY702028	0.380613	-2.62734	SGGFPa6-2010 down vs IFskina6-2010	0.186598	-5.35911	SGGFPa6-2011 down vs IFskina6-2011
10535329	26819	NM_019943 // Papolb // poly (A) polymerase beta (testis specific) // 5 G2|5 // 56522 //	Papolb	NM_019943	0.379778	-2.63312	SGGFPa6-2010 down vs IFskina6-2010	0.472659	-2.11569	SGGFPa6-2011 down vs IFskina6-2011
10598575	34109	NM_173414 // Lancl3 // LanC lantibiotic synthetase component C-like 3 (bacterial) // X	Lancl3	NM_173414	0.379028	-2.63833	SGGFPa6-2010 down vs IFskina6-2010	0.455197	-2.19685	SGGFPa6-2011 down vs IFskina6-2011
10553635	28970	NM_153578 // Nipa1 // non imprinted in Prader-Willi/Angelman syndrome 1 homolog (human)	Nipa1	NM_153578	0.378935	-2.63898	SGGFPa6-2010 down vs IFskina6-2010	0.411947	-2.4275	SGGFPa6-2011 down vs IFskina6-2011				Cell Junction
10551626	28731	NM_010706 // Lgals4 // lectin, galactose binding, soluble 4 // 7 A3|7 4.0 cM // 16855 /	Lgals4	NM_010706	0.378418	-2.64258	SGGFPa6-2010 down vs IFskina6-2010	0.485151	-2.06121	SGGFPa6-2011 down vs IFskina6-2011				Cell Junction
10428008	15510	NM_026153 // Ankrd33b // ankyrin repeat domain 33B // 15|15 B3.2 // 67434 /// NM_001164	Ankrd33b	NM_026153	0.378381	-2.64284	SGGFPa6-2010 down vs IFskina6-2010	0.306414	-3.26356	SGGFPa6-2011 down vs IFskina6-2011
10552581	28871	NM_020268 // Klk1b27 // kallikrein 1-related peptidase b27 // 7 B4|7 23.11 cM // 16619	Klk1b27	NM_020268	0.378248	-2.64377	SGGFPa6-2010 down vs IFskina6-2010	0.415472	-2.4069	SGGFPa6-2011 down vs IFskina6-2011
10537458	27047	NM_001004182 // Gm5567 // predicted gene 5567 // 6 B1|6 // 434008 /// ENSMUST0000006174	Gm5567	NM_001004182	0.377846	-2.64658	SGGFPa6-2010 down vs IFskina6-2010	0.414712	-2.41131	SGGFPa6-2011 down vs IFskina6-2011
10484747	21493	NM_001011535 // Olfr1182 // olfactory receptor 1182 // 2 D|2 // 258167 /// ENSMUST00000	Olfr1182	NM_001011535	0.377455	-2.64932	SGGFPa6-2010 down vs IFskina6-2010	0.474172	-2.10894	SGGFPa6-2011 down vs IFskina6-2011				Receptor
10591196	33298	NM_146906 // Olfr853 // olfactory receptor 853 // 9 A2-A5|9 // 258908 /// ENSMUST000000	Olfr853	NM_146906	0.377455	-2.64932	SGGFPa6-2010 down vs IFskina6-2010	0.306206	-3.26578	SGGFPa6-2011 down vs IFskina6-2011
10546430	28107	NM_175314 // Adamts9 // a disintegrin-like and metallopeptidase (reprolysin type) with	Adamts9	NM_175314	0.37713	-2.65161	SGGFPa6-2010 down vs IFskina6-2010	0.418621	-2.38879	SGGFPa6-2011 down vs IFskina6-2011				Receptor
10559343	29579	NM_001113373 // Shank2 // SH3/ankyrin domain gene 2 // 7 F5|7 // 210274 /// NM_00108137	Shank2	NM_001113373	0.376938	-2.65295	SGGFPa6-2010 down vs IFskina6-2010	0.389979	-2.56424	SGGFPa6-2011 down vs IFskina6-2011				Cell Cycle/Txn
10418300	14522	NM_009785 // Cacna2d3 // calcium channel, voltage-dependent, alpha2/delta subunit 3 //	Cacna2d3	NM_009785	0.375295	-2.66457	SGGFPa6-2010 down vs IFskina6-2010	0.349421	-2.86188	SGGFPa6-2011 down vs IFskina6-2011
10407999	13254	NM_010343 // Gpx5 // glutathione peroxidase 5 // 13 A2-A4|13 8.0 cM // 14780 /// ENSMUS	Gpx5	NM_010343	0.375172	-2.66545	SGGFPa6-2010 down vs IFskina6-2010	0.438687	-2.27953	SGGFPa6-2011 down vs IFskina6-2011
10352501	7416	NR_029908 // Mir215 // microRNA 215 // 1|1 // 387211	Mir215	NR_029908	0.374602	-2.6695	SGGFPa6-2010 down vs IFskina6-2010	0.388663	-2.57292	SGGFPa6-2011 down vs IFskina6-2011
10374356	9697	NM_145967 // Vstm2a // V-set and transmembrane domain containing 2A // 11 A2|11 // 2117	Vstm2a	NM_145967	0.374228	-2.67217	SGGFPa6-2010 down vs IFskina6-2010	0.396989	-2.51896	SGGFPa6-2011 down vs IFskina6-2011
10549849	28474	NM_001025163 // Zfp78 // zinc finger protein 78 // 7 A1|7 8.0 cM // 330463 /// NM_17788	Zfp78	NM_001025163	0.373424	-2.67792	SGGFPa6-2010 down vs IFskina6-2010	0.373683	-2.67606	SGGFPa6-2011 down vs IFskina6-2011
10487879	21804	NM_178607 // Rnf24 // ring finger protein 24 // 2 F1|2 74.0 cM // 51902 /// ENSMUST0000	Rnf24	NM_178607	0.372304	-2.68598	SGGFPa6-2010 down vs IFskina6-2010	0.491986	-2.03258	SGGFPa6-2011 down vs IFskina6-2011
10606868	35199	NM_009052 // Bex1 // brain expressed gene 1 // X F1|X 57.5 cM // 19716 /// ENSMUST00000	Bex1	NM_009052	0.372177	-2.6869	SGGFPa6-2010 down vs IFskina6-2010	0.137593	-7.26779	SGGFPa6-2011 down vs IFskina6-2011				Receptor
10425985	15285	NR_029727 // Mirlet7b // microRNA let7b // 15|15 // 387245	Mirlet7b	NR_029727	0.371122	-2.69453	SGGFPa6-2010 down vs IFskina6-2010	0.440059	-2.27242	SGGFPa6-2011 down vs IFskina6-2011				Receptor
10476312	20625	ENSMUST00000077150 // 4930425F17Rik // RIKEN cDNA 4930425F17 gene // 2|2 // 78107	4930425F17Rik	ENSMUST00000077150	0.36989	-2.7035	SGGFPa6-2010 down vs IFskina6-2010	0.413196	-2.42016	SGGFPa6-2011 down vs IFskina6-2011				Receptor
10455135	18372	NM_053146 // Pcdhb21 // protocadherin beta 21 // 18 B3|18 // 93892 /// ENSMUST000000614	Pcdhb21	NM_053146	0.369375	-2.70728	SGGFPa6-2010 down vs IFskina6-2010	0.43949	-2.27537	SGGFPa6-2011 down vs IFskina6-2011				Receptor
10484841	21536	NM_146965 // Olfr1250 // olfactory receptor 1250 // 2 E1|2 // 258967 /// NM_207568 // O	Olfr1250	NM_146965	0.36936	-2.70739	SGGFPa6-2010 down vs IFskina6-2010	0.285699	-3.50019	SGGFPa6-2011 down vs IFskina6-2011				Receptor
10602588	34625	NR_029753 // Mir98 // microRNA 98 // X|X // 723947	Mir98	NR_029753	0.369135	-2.70903	SGGFPa6-2010 down vs IFskina6-2010	0.354552	-2.82046	SGGFPa6-2011 down vs IFskina6-2011
10518216	25142	ENSMUST00000067360 // Gm9944 // predicted gene 9944 // --- // 791356	Gm9944	ENSMUST00000067360	0.367614	-2.72024	SGGFPa6-2010 down vs IFskina6-2010	0.40228	-2.48583	SGGFPa6-2011 down vs IFskina6-2011
10583446	32499	NM_146561 // Olfr873 // olfactory receptor 873 // 9 A3|9 // 258554 /// ENSMUST000000539	Olfr873	NM_146561	0.367614	-2.72024	SGGFPa6-2010 down vs IFskina6-2010	0.470276	-2.12641	SGGFPa6-2011 down vs IFskina6-2011				Cytoskeleton
10384352	10712	NM_015785 // Zpbp // zona pellucida binding protein // 11|11 A2 // 53604 /// NM_0011851	Zpbp	NM_015785	0.367565	-2.72061	SGGFPa6-2010 down vs IFskina6-2010	0.432968	-2.30964	SGGFPa6-2011 down vs IFskina6-2011
10542028	27552	NM_022657 // Fgf23 // fibroblast growth factor 23 // 6 F3|6 // 64654 /// AF263536 // Fg	Fgf23	NM_022657	0.367406	-2.72179	SGGFPa6-2010 down vs IFskina6-2010	0.454897	-2.1983	SGGFPa6-2011 down vs IFskina6-2011
10473479	20295	NM_146584 // Olfr1026 // olfactory receptor 1026 // 2 E1|2 // 258577 /// ENSMUST0000005	Olfr1026	NM_146584	0.367225	-2.72313	SGGFPa6-2010 down vs IFskina6-2010	0.427627	-2.33849	SGGFPa6-2011 down vs IFskina6-2011
10541575	27508	NM_001005860 // Clec4a4 // C-type lectin domain family 4, member a4 // 6 F2|6 // 474145	Clec4a4	NM_001005860	0.366832	-2.72604	SGGFPa6-2010 down vs IFskina6-2010	0.243935	-4.09945	SGGFPa6-2011 down vs IFskina6-2011
10367532	9007	NM_183264 // 5830405N20Rik // RIKEN cDNA 5830405N20 gene // 10 D3|10 // 67596 /// ENSMU	5830405N20Rik	NM_183264	0.366589	-2.72785	SGGFPa6-2010 down vs IFskina6-2010	0.396989	-2.51896	SGGFPa6-2011 down vs IFskina6-2011
10417579	14442	NM_028934 // 4930452B06Rik // RIKEN cDNA 4930452B06 gene // 14 A1|14 // 74430 /// ENSMU	4930452B06Rik	NM_028934	0.364797	-2.74125	SGGFPa6-2010 down vs IFskina6-2010	0.406605	-2.45939	SGGFPa6-2011 down vs IFskina6-2011
10600741	34401	NM_001034103 // Gm5941 // predicted gene 5941 // X C2|X // 546347 /// ENSMUST0000009637	Gm5941	NM_001034103	0.363791	-2.74883	SGGFPa6-2010 down vs IFskina6-2010	0.497875	-2.00853	SGGFPa6-2011 down vs IFskina6-2011
10516037	24922	NM_001033791 // Gm12888 // predicted gene 12888 // 4 D2.2|4 // 545677 /// ENSMUST000000	Gm12888	NM_001033791	0.363556	-2.75061	SGGFPa6-2010 down vs IFskina6-2010	0.35208	-2.84027	SGGFPa6-2011 down vs IFskina6-2011
10462887	19213	NM_033614 // Pde6c // phosphodiesterase 6C, cGMP specific, cone, alpha prime // 19 C3|1	Pde6c	NM_033614	0.363269	-2.75278	SGGFPa6-2010 down vs IFskina6-2010	0.467652	-2.13834	SGGFPa6-2011 down vs IFskina6-2011
10601270	34455	ENSMUST00000101339 // Gm10456 // predicted gene 10456 // X D|X // 100038406	Gm10456	ENSMUST00000101339	0.36239	-2.75946	SGGFPa6-2010 down vs IFskina6-2010	0.438977	-2.27802	SGGFPa6-2011 down vs IFskina6-2011
10581518	32254	NM_025458 // Tmed6 // transmembrane emp24 protein transport domain containing 6 // 8|8	Tmed6	NM_025458	0.36239	-2.75946	SGGFPa6-2010 down vs IFskina6-2010	0.484283	-2.06491	SGGFPa6-2011 down vs IFskina6-2011
10473620	20359	NM_207140 // Olfr1212 // olfactory receptor 1212 // 2 E1|2 // 258241 /// ENSMUST0000005	Olfr1212	NM_207140	0.361423	-2.76684	SGGFPa6-2010 down vs IFskina6-2010	0.356056	-2.80855	SGGFPa6-2011 down vs IFskina6-2011
10347895	6948	NR_027636 // Wdr69 // WD repeat domain 69 // 1 C5|1 // 71227 /// NM_027725 // Wdr69 //	Wdr69	NR_027636	0.359687	-2.7802	SGGFPa6-2010 down vs IFskina6-2010	0.42141	-2.37299	SGGFPa6-2011 down vs IFskina6-2011
10408565	13365	NM_173051 // Serpinb1c // serine (or cysteine) peptidase inhibitor, clade B, member 1c	Serpinb1c	NM_173051	0.358969	-2.78576	SGGFPa6-2010 down vs IFskina6-2010	0.436482	-2.29104	SGGFPa6-2011 down vs IFskina6-2011
10607431	35276	NM_020019 // Magea6 // melanoma antigen, family A, 6 // X F3|X 66.15 cM // 17142 /// EN	Magea6	NM_020019	0.358664	-2.78813	SGGFPa6-2010 down vs IFskina6-2010	0.320619	-3.11896	SGGFPa6-2011 down vs IFskina6-2011
10508797	24132	ENSMUST00000084243 // Gm10151 // predicted gene 10151 // --- // 791321	Gm10151	ENSMUST00000084243	0.358265	-2.79123	SGGFPa6-2010 down vs IFskina6-2010	0.472014	-2.11858	SGGFPa6-2011 down vs IFskina6-2011
10344674	6630	NM_001195732 // Fam150a // family with sequence similarity 150, member A // 1 A1|1 // 6	Fam150a	NM_001195732	0.35778	-2.79501	SGGFPa6-2010 down vs IFskina6-2010	0.388722	-2.57253	SGGFPa6-2011 down vs IFskina6-2011
10548653	28339	NM_001024705 // Prpmp5 // proline-rich protein MP5 // 6 G1|6 // 381832 /// ENSMUST00000	Prpmp5	NM_001024705	0.356989	-2.80121	SGGFPa6-2010 down vs IFskina6-2010	0.485146	-2.06123	SGGFPa6-2011 down vs IFskina6-2011				Iron (Fe) Transport/Receptor
10367050	8944	AY053573 // Rdh18-ps // retinol dehydrogenase 18, pseudogene // 10 D3|10 // 380674 ///	Rdh18-ps	AY053573	0.35561	-2.81207	SGGFPa6-2010 down vs IFskina6-2010	0.473403	-2.11237	SGGFPa6-2011 down vs IFskina6-2011
10414581	14040	AY358078 // AY358078 // cDNA sequence AY358078 // 14 C2|14 // 278676 /// ENSMUST0000005	AY358078	AY358078	0.35519	-2.8154	SGGFPa6-2010 down vs IFskina6-2010	0.456541	-2.19038	SGGFPa6-2011 down vs IFskina6-2011
10484579	21416	NM_207562 // Olfr1051 // olfactory receptor 1051 // 2 D|2 // 404324 /// ENSMUST00000099	Olfr1051	NM_207562	0.354273	-2.82268	SGGFPa6-2010 down vs IFskina6-2010	0.453378	-2.20567	SGGFPa6-2011 down vs IFskina6-2011				Cell Adhesion/Signal
10566666	30653	ENSMUST00000084758 // Olfr471 // olfactory receptor 471 // 7 E3|7 // 626674	Olfr471	ENSMUST00000084758	0.353905	-2.82562	SGGFPa6-2010 down vs IFskina6-2010	0.320929	-3.11596	SGGFPa6-2011 down vs IFskina6-2011
10415811	14224	AK053602 // Serpine3 // serpin peptidase inhibitor, clade E (nexin, plasminogen activat	Serpine3	AK053602	0.352266	-2.83877	SGGFPa6-2010 down vs IFskina6-2010	0.346219	-2.88835	SGGFPa6-2011 down vs IFskina6-2011
10590149	33180	NM_001033209 // Xylb // xylulokinase homolog (H. influenzae) // 9 F3|9 // 102448 /// EN	Xylb	NM_001033209	0.352094	-2.84015	SGGFPa6-2010 down vs IFskina6-2010	0.42142	-2.37293	SGGFPa6-2011 down vs IFskina6-2011
10563110	30049	NR_002455 // Snord34 // small nucleolar RNA, C/D box 34 // 7 B4|7 // 27210 /// BC065799	Snord34	NR_002455	0.351937	-2.84142	SGGFPa6-2010 down vs IFskina6-2010	0.16786	-5.95733	SGGFPa6-2011 down vs IFskina6-2011
10563725	30108	ENSMUST00000060569 // Mrgpra2a // MAS-related GPR, member A2A // 7 B4|7 // 668727	Mrgpra2a	ENSMUST00000060569	0.351069	-2.84844	SGGFPa6-2010 down vs IFskina6-2010	0.402967	-2.48159	SGGFPa6-2011 down vs IFskina6-2011
10601280	34458	NM_001039116 // Dmrtc1b // DMRT-like family C1b // X D|X // 632708 /// ENSMUST000001013	Dmrtc1b	NM_001039116	0.351068	-2.84845	SGGFPa6-2010 down vs IFskina6-2010	0.369112	-2.70921	SGGFPa6-2011 down vs IFskina6-2011
10566184	30526	NM_147088 // Olfr569 // olfactory receptor 569 // 7 E3|7 // 259092 /// ENSMUST000000781	Olfr569	NM_147088	0.35088	-2.84998	SGGFPa6-2010 down vs IFskina6-2010	0.232211	-4.30643	SGGFPa6-2011 down vs IFskina6-2011
10517899	25109	AK049864 // C630004L07Rik // RIKEN cDNA C630004L07 gene // 4 E1|4 // 329973 /// XR_1048	C630004L07Rik	AK049864	0.350657	-2.85179	SGGFPa6-2010 down vs IFskina6-2010	0.29038	-3.44377	SGGFPa6-2011 down vs IFskina6-2011
10479074	20925	AK005811 // 1700010B08Rik // RIKEN cDNA 1700010B08 gene // 2 H4|2 // 75485 /// ENSMUST0	1700010B08Rik	AK005811	0.350649	-2.85185	SGGFPa6-2010 down vs IFskina6-2010	0.340925	-2.93319	SGGFPa6-2011 down vs IFskina6-2011
10422946	14979	NM_198024 // Ranbp3l // RAN binding protein 3-like // 15 A1|15 // 223332 /// ENSMUST000	Ranbp3l	NM_198024	0.350133	-2.85606	SGGFPa6-2010 down vs IFskina6-2010	0.422277	-2.36811	SGGFPa6-2011 down vs IFskina6-2011
10503019	23475	ENSMUST00000067993 // 4930566N20Rik // RIKEN cDNA 4930566N20 gene // 3 H4|3 // 75924	4930566N20Rik	ENSMUST00000067993	0.349699	-2.8596	SGGFPa6-2010 down vs IFskina6-2010	0.342797	-2.91718	SGGFPa6-2011 down vs IFskina6-2011
10583394	32482	NM_207145 // Olfr845 // olfactory receptor 845 // 9 A2|9 // 258249 /// ENSMUST000000712	Olfr845	NM_207145	0.349613	-2.8603	SGGFPa6-2010 down vs IFskina6-2010	0.294129	-3.39987	SGGFPa6-2011 down vs IFskina6-2011
10583380	32475	NM_001011824 // Olfr832 // olfactory receptor 832 // 9 A2|9 // 258075 /// ENSMUST000000	Olfr832	NM_001011824	0.349156	-2.86405	SGGFPa6-2010 down vs IFskina6-2010	0.320547	-3.11967	SGGFPa6-2011 down vs IFskina6-2011
10484612	21432	NM_146407 // Olfr1079 // olfactory receptor 1079 // 2 E1|2 // 258402 /// ENSMUST0000011	Olfr1079	NM_146407	0.348849	-2.86657	SGGFPa6-2010 down vs IFskina6-2010	0.490209	-2.03995	SGGFPa6-2011 down vs IFskina6-2011
10448178	17655	NM_134193 // Vmn1r232 // vomeronasal 1 receptor 232 // 17 A3.2|17 // 171227 /// ENSMUST	Vmn1r232	NM_134193	0.348849	-2.86657	SGGFPa6-2010 down vs IFskina6-2010	0.258368	-3.87044	SGGFPa6-2011 down vs IFskina6-2011
10606979	35216	NM_001081668 // Nup62cl // nucleoporin 62 C-terminal like // X F1|X // 279706 /// BC100	Nup62cl	NM_001081668	0.348535	-2.86916	SGGFPa6-2010 down vs IFskina6-2010	0.285312	-3.50493	SGGFPa6-2011 down vs IFskina6-2011
10457345	18592	NM_001081393 // Armc4 // armadillo repeat containing 4 // 18 A1|18 // 74934 /// ENSMUST	Armc4	NM_001081393	0.347389	-2.87861	SGGFPa6-2010 down vs IFskina6-2010	0.377958	-2.6458	SGGFPa6-2011 down vs IFskina6-2011
10510859	24325	NM_001162977 // Megf6 // multiple EGF-like-domains 6 // 4 E2|4 // 230971 /// ENSMUST000	Megf6	NM_001162977	0.347182	-2.88034	SGGFPa6-2010 down vs IFskina6-2010	0.442801	-2.25835	SGGFPa6-2011 down vs IFskina6-2011
10473467	20289	NM_146586 // Olfr1018 // olfactory receptor 1018 // 2 E1|2 // 258579 /// ENSMUST0000005	Olfr1018	NM_146586	0.346527	-2.88578	SGGFPa6-2010 down vs IFskina6-2010	0.379659	-2.63395	SGGFPa6-2011 down vs IFskina6-2011
10373676	9632	NM_146676 // Olfr826 // olfactory receptor 826 // 10 D3|10 // 258671 /// ENSMUST0000007	Olfr826	NM_146676	0.34641	-2.88675	SGGFPa6-2010 down vs IFskina6-2010	0.373079	-2.6804	SGGFPa6-2011 down vs IFskina6-2011
10586454	32870	AK050877 // D030028M11Rik // RIKEN cDNA D030028M11 gene // 9|9 // 319910	D030028M11Rik	AK050877	0.345101	-2.8977	SGGFPa6-2010 down vs IFskina6-2010	0.425458	-2.35041	SGGFPa6-2011 down vs IFskina6-2011				Apoptosis
10367526	9004	NM_146675 // Olfr820 // olfactory receptor 820 // 10 D3|10 // 258670 /// ENSMUST0000005	Olfr820	NM_146675	0.344043	-2.90662	SGGFPa6-2010 down vs IFskina6-2010	0.4357	-2.29516	SGGFPa6-2011 down vs IFskina6-2011
10515144	24807	NM_177668 // Skint10 // selection and upkeep of intraepithelial T cells 10 // 4 D1|4 //	Skint10	NM_177668	0.344043	-2.90662	SGGFPa6-2010 down vs IFskina6-2010	0.497824	-2.00874	SGGFPa6-2011 down vs IFskina6-2011
10503902	23587	NM_007726 // Cnr1 // cannabinoid receptor 1 (brain) // 4 A5|4 13.9 cM // 12801 /// ENSM	Cnr1	NM_007726	0.343657	-2.90988	SGGFPa6-2010 down vs IFskina6-2010	0.343539	-2.91088	SGGFPa6-2011 down vs IFskina6-2011
10457798	18637	NM_027616 // 4921528I01Rik // RIKEN cDNA 4921528I01 gene // 18 A2|18 // 70950 /// ENSMU	4921528I01Rik	NM_027616	0.343484	-2.91135	SGGFPa6-2010 down vs IFskina6-2010	0.461124	-2.16862	SGGFPa6-2011 down vs IFskina6-2011				Receptor/Protein Transport
10599530	34240	NM_011228 // Rab33a // RAB33A, member of RAS oncogene family // X A4|X // 19337 /// ENS	Rab33a	NM_011228	0.343424	-2.91185	SGGFPa6-2010 down vs IFskina6-2010	0.299601	-3.33778	SGGFPa6-2011 down vs IFskina6-2011
10570641	31103	NM_001012640 // AY761185 // cDNA sequence AY761185 // 8 A2|8 // 503556 /// AY761185 //	AY761185	NM_001012640	0.343385	-2.91218	SGGFPa6-2010 down vs IFskina6-2010	0.442812	-2.25829	SGGFPa6-2011 down vs IFskina6-2011				Cytoskeleton
10360942	8293	NM_028848 // Spata17 // spermatogenesis associated 17 // 1 H5|1 // 74717 /// NM_029067	Spata17	NM_028848	0.343086	-2.91473	SGGFPa6-2010 down vs IFskina6-2010	0.392887	-2.54526	SGGFPa6-2011 down vs IFskina6-2011
10420268	14727	NM_010373 // Gzme // granzyme E // 14 C3|14 20.5 cM // 14942 /// ENSMUST00000089549 //	Gzme	NM_010373	0.343006	-2.9154	SGGFPa6-2010 down vs IFskina6-2010	0.361819	-2.76381	SGGFPa6-2011 down vs IFskina6-2011
10445935	17416	NM_001037718 // 4932415M13Rik // RIKEN cDNA 4932415M13 gene // 17 C|17 // 211496 /// NR	4932415M13Rik	NM_001037718	0.342832	-2.91688	SGGFPa6-2010 down vs IFskina6-2010	0.396989	-2.51896	SGGFPa6-2011 down vs IFskina6-2011				Cell Junction
10470175	19952	NM_153558 // Lcn13 // lipocalin 13 // 2 A3|2 // 227627 /// ENSMUST00000077667 // Lcn13	Lcn13	NM_153558	0.342518	-2.91956	SGGFPa6-2010 down vs IFskina6-2010	0.316307	-3.16149	SGGFPa6-2011 down vs IFskina6-2011
10425741	15258	NM_029066 // Wbp2nl // WBP2 N-terminal like // 15|15 E2 // 74716 /// ENSMUST00000023089	Wbp2nl	NM_029066	0.34234	-2.92107	SGGFPa6-2010 down vs IFskina6-2010	0.241703	-4.13731	SGGFPa6-2011 down vs IFskina6-2011
10566674	30657	NM_146733 // Olfr482 // olfactory receptor 482 // 7 E3|7 // 258728 /// ENSMUST000000811	Olfr482	NM_146733	0.342186	-2.92239	SGGFPa6-2010 down vs IFskina6-2010	0.0797895	-12.533	SGGFPa6-2011 down vs IFskina6-2011
10499811	23108	NM_008727 // Npr1 // natriuretic peptide receptor 1 // 3 F1|3 47.6 cM // 18160 /// ENSM	Npr1	NM_008727	0.342158	-2.92263	SGGFPa6-2010 down vs IFskina6-2010	0.362412	-2.75929	SGGFPa6-2011 down vs IFskina6-2011
10453609	18213	NM_026092 // Lyzl1 // lysozyme-like 1 // 18 A1|18 // 67328 /// ENSMUST00000025076 // Ly	Lyzl1	NM_026092	0.342106	-2.92307	SGGFPa6-2010 down vs IFskina6-2010	0.388786	-2.57211	SGGFPa6-2011 down vs IFskina6-2011
10408200	13312	NM_175655 // Hist1h4f // histone cluster 1, H4f // 13 A2-A3|13 // 319157	Hist1h4f	NM_175655	0.341825	-2.92547	SGGFPa6-2010 down vs IFskina6-2010	0.346662	-2.88465	SGGFPa6-2011 down vs IFskina6-2011				Ion Transport/Receptor
10450199	17854	NM_001081663 // Btnl7 // butyrophilin-like 7 // 17 B1|17 // 195349	Btnl7	NM_001081663	0.341102	-2.93168	SGGFPa6-2010 down vs IFskina6-2010	0.30039	-3.32901	SGGFPa6-2011 down vs IFskina6-2011				Cell Cycle/Protein Transport
10469129	19828	NR_024257 // 4930412O13Rik // RIKEN cDNA 4930412O13 gene // 2 A1|2 // 381347 /// ENSMUS	4930412O13Rik	NR_024257	0.340953	-2.93296	SGGFPa6-2010 down vs IFskina6-2010	0.352683	-2.83541	SGGFPa6-2011 down vs IFskina6-2011
10570621	31097	NM_013756 // Defb3 // defensin beta 3 // 8|8 // 27358 /// ENSMUST00000033852 // Defb3 /	Defb3	NM_013756	0.340533	-2.93657	SGGFPa6-2010 down vs IFskina6-2010	0.341634	-2.92711	SGGFPa6-2011 down vs IFskina6-2011				Cell Cycle/Txn
10351471	7297	NM_010633 // Uhmk1 // U2AF homology motif (UHM) kinase 1 // 1|1 H2 // 16589 /// BC05873	Uhmk1	NM_010633	0.340043	-2.94081	SGGFPa6-2010 down vs IFskina6-2010	0.216107	-4.62733	SGGFPa6-2011 down vs IFskina6-2011
10440136	16754	NM_147000 // Olfr173 // olfactory receptor 173 // 16 C2|16 // 259002 /// ENSMUST0000004	Olfr173	NM_147000	0.336319	-2.97336	SGGFPa6-2010 down vs IFskina6-2010	0.228907	-4.36859	SGGFPa6-2011 down vs IFskina6-2011
10545022	27909	NM_134183 // Vmn1r21 // vomeronasal 1 receptor 21 // 6 B3|6 // 171201 /// ENSMUST000000	Vmn1r21	NM_134183	0.336319	-2.97336	SGGFPa6-2010 down vs IFskina6-2010	0.325629	-3.07098	SGGFPa6-2011 down vs IFskina6-2011
10581654	32274	NM_007586 // Calb2 // calbindin 2 // 8 E1|8 // 12308 /// ENSMUST00000003754 // Calb2 //	Calb2	NM_007586	0.335609	-2.97965	SGGFPa6-2010 down vs IFskina6-2010	0.356056	-2.80855	SGGFPa6-2011 down vs IFskina6-2011				Cytoskeleton
10494003	22492	NM_207271 // Tdpoz3 // TD and POZ domain containing 3 // 3 F2.1|3 // 399674 /// ENSMUST	Tdpoz3	NM_207271	0.334541	-2.98917	SGGFPa6-2010 down vs IFskina6-2010	0.427627	-2.33849	SGGFPa6-2011 down vs IFskina6-2011
10536083	26911	NM_001105057 // Vmn2r60 // vomeronasal 2, receptor 60 // 7 B3|7 // 637898 /// NR_028441	Vmn2r60	NM_001105057	0.334405	-2.99039	SGGFPa6-2010 down vs IFskina6-2010	0.407305	-2.45516	SGGFPa6-2011 down vs IFskina6-2011
10484872	21550	NM_146985 // Olfr1270 // olfactory receptor 1270 // 2 E1|2 // 258987 /// ENSMUST0000009	Olfr1270	NM_146985	0.334368	-2.99071	SGGFPa6-2010 down vs IFskina6-2010	0.328469	-3.04443	SGGFPa6-2011 down vs IFskina6-2011
10414470	14014	NM_205819 // Tlr11 // toll-like receptor 11 // 14 C1|14 // 239081 /// ENSMUST0000006357	Tlr11	NM_205819	0.33322	-3.00102	SGGFPa6-2010 down vs IFskina6-2010	0.317011	-3.15446	SGGFPa6-2011 down vs IFskina6-2011
10539465	27296	NM_029245 // Ankrd53 // ankyrin repeat domain 53 // 6 D1|6 // 75305 /// ENSMUST00000014	Ankrd53	NM_029245	0.332076	-3.01136	SGGFPa6-2010 down vs IFskina6-2010	0.498122	-2.00754	SGGFPa6-2011 down vs IFskina6-2011
10544588	27849	NM_031247 // Gimap3 // GTPase, IMAP family member 3 // 6 B2.3|6 // 83408 /// ENSMUST000	Gimap3	NM_031247	0.331254	-3.01883	SGGFPa6-2010 down vs IFskina6-2010	0.452658	-2.20917	SGGFPa6-2011 down vs IFskina6-2011
10566294	30568	NM_146822 // Olfr640 // olfactory receptor 640 // 7 E3|7 // 258819 /// ENSMUST000000847	Olfr640	NM_146822	0.330468	-3.02601	SGGFPa6-2010 down vs IFskina6-2010	0.370825	-2.69669	SGGFPa6-2011 down vs IFskina6-2011
10351616	7320	NM_009480 // Usf1 // upstream transcription factor 1 // 1 H|1 93.3 cM // 22278 /// ENSM	Usf1	NM_009480	0.328935	-3.04011	SGGFPa6-2010 down vs IFskina6-2010	0.261907	-3.81814	SGGFPa6-2011 down vs IFskina6-2011
10484571	21412	NM_146582 // Olfr1046 // olfactory receptor 1046 // 2 E1|2 // 258575 /// ENSMUST0000009	Olfr1046	NM_146582	0.328843	-3.04097	SGGFPa6-2010 down vs IFskina6-2010	0.319353	-3.13133	SGGFPa6-2011 down vs IFskina6-2011
10459324	18802	NM_001168423 // Spink13 // serine peptidase inhibitor, Kazal type 13 // 18|18 // 100038	Spink13	NM_001168423	0.328843	-3.04097	SGGFPa6-2010 down vs IFskina6-2010	0.325629	-3.07098	SGGFPa6-2011 down vs IFskina6-2011				Cell Cycle/Ubl Conj Path
10572024	31280	NM_023689 // Spock3 // sparc/osteonectin, cwcv and kazal-like domains proteoglycan 3 //	Spock3	NM_023689	0.328376	-3.04529	SGGFPa6-2010 down vs IFskina6-2010	0.306206	-3.26578	SGGFPa6-2011 down vs IFskina6-2011
10583820	32532	NM_001033813 // Zfp872 // zinc finger protein 872 // 9 A3|9 // 619310 /// ENSMUST000000	Zfp872	NM_001033813	0.328156	-3.04733	SGGFPa6-2010 down vs IFskina6-2010	0.280238	-3.56839	SGGFPa6-2011 down vs IFskina6-2011
10542253	27590	NM_199155 // Tas2r110 // taste receptor, type 2, member 110 // 6 G1|6 63.5 cM // 387344	Tas2r110	NM_199155	0.328154	-3.04735	SGGFPa6-2010 down vs IFskina6-2010	0.458119	-2.18284	SGGFPa6-2011 down vs IFskina6-2011
10522925	25605	NM_008644 // Prol1 // proline rich, lacrimal 1 // 5 E1|5 // 17830 /// ENSMUST0000007865	Prol1	NM_008644	0.326102	-3.06652	SGGFPa6-2010 down vs IFskina6-2010	0.298746	-3.34733	SGGFPa6-2011 down vs IFskina6-2011
10592376	33432	NM_001011864 // Olfr917 // olfactory receptor 917 // 9 A5.1|9 // 258183 /// ENSMUST0000	Olfr917	NM_001011864	0.324853	-3.07831	SGGFPa6-2010 down vs IFskina6-2010	0.394118	-2.53731	SGGFPa6-2011 down vs IFskina6-2011
10502785	23450	ENSMUST00000093950 // Gm10287 // predicted gene 10287 // --- // 100038391	Gm10287	ENSMUST00000093950	0.324574	-3.08096	SGGFPa6-2010 down vs IFskina6-2010	0.367801	-2.71886	SGGFPa6-2011 down vs IFskina6-2011
10538706	27198	NM_027613 // Mmrn1 // multimerin 1 // 6 C1|6 29.0 cM // 70945 /// NM_001163507 // Mmrn1	Mmrn1	NM_027613	0.324147	-3.08502	SGGFPa6-2010 down vs IFskina6-2010	0.459257	-2.17743	SGGFPa6-2011 down vs IFskina6-2011
10461840	19108	NM_001011850 // Olfr1505 // olfactory receptor 1505 // 19 A|19 // 258151 /// ENSMUST000	Olfr1505	NM_001011850	0.323358	-3.09255	SGGFPa6-2010 down vs IFskina6-2010	0.499616	-2.00154	SGGFPa6-2011 down vs IFskina6-2011
10461808	19094	NM_001011842 // Olfr1474 // olfactory receptor 1474 // 19 A|19 // 258123 /// ENSMUST000	Olfr1474	NM_001011842	0.323262	-3.09347	SGGFPa6-2010 down vs IFskina6-2010	0.481314	-2.07765	SGGFPa6-2011 down vs IFskina6-2011
10554718	29075	NM_001105184 // Vmn2r71 // vomeronasal 2, receptor 71 // 7 D3|7 // 233445	Vmn2r71	NM_001105184	0.323141	-3.09462	SGGFPa6-2010 down vs IFskina6-2010	0.499762	-2.00095	SGGFPa6-2011 down vs IFskina6-2011
10604143	34830	XM_003086829 // Gm6310 // predicted pseudogene 6310 // X A3.3|X // 622311 /// XM_886739	Gm6310	XM_003086829	0.323102	-3.095	SGGFPa6-2010 down vs IFskina6-2010	0.30825	-3.24412	SGGFPa6-2011 down vs IFskina6-2011
10601867	34557	NM_177749 // Kir3dl1 // killer cell immunoglobulin-like receptor, three domains, long c	Kir3dl1	NM_177749	0.323081	-3.0952	SGGFPa6-2010 down vs IFskina6-2010	0.315025	-3.17435	SGGFPa6-2011 down vs IFskina6-2011
10582180	32318	NM_001033980 // Fam92b // family with sequence similarity 92, member B // 8 E1|8 // 436	Fam92b	NM_001033980	0.321434	-3.11106	SGGFPa6-2010 down vs IFskina6-2010	0.380649	-2.62709	SGGFPa6-2011 down vs IFskina6-2011
10484516	21391	NM_146433 // Olfr994 // olfactory receptor 994 // 2 E1|2 // 258425 /// ENSMUST000000999	Olfr994	NM_146433	0.320554	-3.1196	SGGFPa6-2010 down vs IFskina6-2010	0.40228	-2.48583	SGGFPa6-2011 down vs IFskina6-2011
10572934	31374	NM_001164235 // 1700007B14Rik // RIKEN cDNA 1700007B14 gene // 8|8 C2 // 71831 /// NM_0	1700007B14Rik	NM_001164235	0.319814	-3.12681	SGGFPa6-2010 down vs IFskina6-2010	0.485655	-2.05907	SGGFPa6-2011 down vs IFskina6-2011
10364424	8679	NM_147071 // Olfr1352 // olfactory receptor 1352 // 10 C1|10 // 259074 /// ENSMUST00000	Olfr1352	NM_147071	0.318308	-3.14161	SGGFPa6-2010 down vs IFskina6-2010	0.361925	-2.763	SGGFPa6-2011 down vs IFskina6-2011
10548663	28342	NM_207024 // Tas2r121 // taste receptor, type 2, member 121 // 6 G1|6 63.4 cM // 387349	Tas2r121	NM_207024	0.317906	-3.14559	SGGFPa6-2010 down vs IFskina6-2010	0.292045	-3.42413	SGGFPa6-2011 down vs IFskina6-2011
10566251	30556	NM_013619 // Olfr67 // olfactory receptor 67 // 7 E3|7 // 18368 /// ENSMUST00000062377	Olfr67	NM_013619	0.317266	-3.15193	SGGFPa6-2010 down vs IFskina6-2010	0.4357	-2.29516	SGGFPa6-2011 down vs IFskina6-2011
10583434	32494	NM_146559 // Olfr868 // olfactory receptor 868 // 9 A2-A5|9 // 258552 /// ENSMUST000000	Olfr868	NM_146559	0.317266	-3.15193	SGGFPa6-2010 down vs IFskina6-2010	0.499205	-2.00318	SGGFPa6-2011 down vs IFskina6-2011
10421418	14835	NM_013514 // Epb4.9 // erythrocyte protein band 4.9 // 14 D2|14 38.0 cM // 13829 /// EN	Epb4.9	NM_013514	0.31671	-3.15746	SGGFPa6-2010 down vs IFskina6-2010	0.481053	-2.07877	SGGFPa6-2011 down vs IFskina6-2011
10389754	11265	BC140961 // 4932411E22Rik // RIKEN cDNA 4932411E22 gene // 11 C|11 // 214604 /// NM_172	4932411E22Rik	BC140961	0.314334	-3.18133	SGGFPa6-2010 down vs IFskina6-2010	0.447645	-2.23391	SGGFPa6-2011 down vs IFskina6-2011
10465764	19480	NM_177002 // C730048C13Rik // RIKEN cDNA C730048C13 gene // 19 A|19 // 319800 /// ENSMU	C730048C13Rik	NM_177002	0.313996	-3.18476	SGGFPa6-2010 down vs IFskina6-2010	0.353076	-2.83225	SGGFPa6-2011 down vs IFskina6-2011
10582958	32415	NM_001033322 // Gucy1a2 // guanylate cyclase 1, soluble, alpha 2 // 9 A1|9 // 234889 //	Gucy1a2	NM_001033322	0.311732	-3.20788	SGGFPa6-2010 down vs IFskina6-2010	0.388663	-2.57292	SGGFPa6-2011 down vs IFskina6-2011
10531009	26390	NM_177024 // Tmprss11bnl // transmembrane protease, serine 11b N terminal like // 5 E1|	Tmprss11bnl	NM_177024	0.311732	-3.20788	SGGFPa6-2010 down vs IFskina6-2010	0.321084	-3.11445	SGGFPa6-2011 down vs IFskina6-2011
10448146	17647	ENSMUST00000095637 // Fpr-rs7 // formyl peptide receptor, related sequence 7 // 17 A3.2	Fpr-rs7	ENSMUST00000095637	0.310902	-3.21644	SGGFPa6-2010 down vs IFskina6-2010	0.319353	-3.13133	SGGFPa6-2011 down vs IFskina6-2011				Cell Junction
10380719	10353	NM_031183 // Sp6 // trans-acting transcription factor 6 // 11 D|11 // 83395 /// ENSMUST	Sp6	NM_031183	0.309332	-3.23277	SGGFPa6-2010 down vs IFskina6-2010	0.443962	-2.25244	SGGFPa6-2011 down vs IFskina6-2011				Tight Junc
10375436	9809	NM_001013783 // Fam71b // family with sequence similarity 71, member B // 11 B1.1|11 //	Fam71b	NM_001013783	0.308924	-3.23704	SGGFPa6-2010 down vs IFskina6-2010	0.359719	-2.77995	SGGFPa6-2011 down vs IFskina6-2011
10469635	19903	ENSMUST00000100368 // Gm10846 // predicted gene 10846 // --- // 100038625	Gm10846	ENSMUST00000100368	0.308601	-3.24043	SGGFPa6-2010 down vs IFskina6-2010	0.43949	-2.27537	SGGFPa6-2011 down vs IFskina6-2011
10583436	32495	NM_146557 // Olfr869 // olfactory receptor 869 // 9 A3|9 // 258550 /// ENSMUST000000757	Olfr869	NM_146557	0.308561	-3.24085	SGGFPa6-2010 down vs IFskina6-2010	0.37588	-2.66043	SGGFPa6-2011 down vs IFskina6-2011				Apoptosis/Ion Transport
10570627	31099	NM_139220 // Defb7 // defensin beta 7 // 8 A1.3|8 // 246080 /// ENSMUST00000047851 // D	Defb7	NM_139220	0.306689	-3.26063	SGGFPa6-2010 down vs IFskina6-2010	0.365854	-2.73333	SGGFPa6-2011 down vs IFskina6-2011
10484764	21501	NM_146778 // Olfr1208 // olfactory receptor 1208 // 2 E1|2 // 258774 /// ENSMUST0000009	Olfr1208	NM_146778	0.306573	-3.26186	SGGFPa6-2010 down vs IFskina6-2010	0.367801	-2.71886	SGGFPa6-2011 down vs IFskina6-2011
10350425	7188	NM_031164 // F13b // coagulation factor XIII, beta subunit // 1 F|1 74.1 cM // 14060 //	F13b	NM_031164	0.305872	-3.26935	SGGFPa6-2010 down vs IFskina6-2010	0.447267	-2.2358	SGGFPa6-2011 down vs IFskina6-2011
10403464	12703	NM_001081426 // Dip2c // DIP2 disco-interacting protein 2 homolog C (Drosophila) // 13	Dip2c	NM_001081426	0.305683	-3.27136	SGGFPa6-2010 down vs IFskina6-2010	0.33321	-3.00111	SGGFPa6-2011 down vs IFskina6-2011
10440149	16760	NM_146321 // Olfr186 // olfactory receptor 186 // 16 C2|16 // 258318 /// ENSMUST0000006	Olfr186	NM_146321	0.305659	-3.27162	SGGFPa6-2010 down vs IFskina6-2010	0.205434	-4.86775	SGGFPa6-2011 down vs IFskina6-2011
10409887	13521	NM_012007 // Ctsj // cathepsin J // 13 B2|13 35.5 cM // 26898 /// ENSMUST00000071526 //	Ctsj	NM_012007	0.304012	-3.28935	SGGFPa6-2010 down vs IFskina6-2010	0.455031	-2.19765	SGGFPa6-2011 down vs IFskina6-2011
10442191	17017	NM_134200 // Vmn1r237 // vomeronasal 1 receptor 237 // 17 A3.2|17 // 171234 /// BC12554	Vmn1r237	NM_134200	0.303284	-3.29724	SGGFPa6-2010 down vs IFskina6-2010	0.343989	-2.90707	SGGFPa6-2011 down vs IFskina6-2011
10442294	17039	NM_001104580 // Vmn2r116 // vomeronasal 2, receptor 116 // 17 A3.3|17 // 619697 /// AB5	Vmn2r116	NM_001104580	0.303111	-3.29912	SGGFPa6-2010 down vs IFskina6-2010	0.242306	-4.12701	SGGFPa6-2011 down vs IFskina6-2011
10416952	14370	NR_029786 // Mir19a // microRNA 19a // 14|14 // 723891	Mir19a	NR_029786	0.303103	-3.29921	SGGFPa6-2010 down vs IFskina6-2010	0.273545	-3.65571	SGGFPa6-2011 down vs IFskina6-2011
10442083	16990	NR_029730 // Mirlet7e // microRNA let7e // 17|17 // 387248	Mirlet7e	NR_029730	0.303056	-3.29972	SGGFPa6-2010 down vs IFskina6-2010	0.469464	-2.13009	SGGFPa6-2011 down vs IFskina6-2011
10412826	13833	ENSMUST00000100863 // Gm10403 // predicted gene 10403 // --- // 100038737	Gm10403	ENSMUST00000100863	0.301466	-3.31712	SGGFPa6-2010 down vs IFskina6-2010	0.355892	-2.80984	SGGFPa6-2011 down vs IFskina6-2011
10455457	18404	NM_010935 // Npy6r // neuropeptide Y receptor Y6 // 18 B3|18 21.0 cM // 18169 /// ENSMU	Npy6r	NM_010935	0.301403	-3.31782	SGGFPa6-2010 down vs IFskina6-2010	0.273545	-3.65571	SGGFPa6-2011 down vs IFskina6-2011
10538781	27205	AF037047 // Gm8479 // thiopurine S-methyltransferase pseudogene // 6 C1|6 // 667141 ///	Gm8479	AF037047	0.298432	-3.35085	SGGFPa6-2010 down vs IFskina6-2010	0.435717	-2.29507	SGGFPa6-2011 down vs IFskina6-2011
10473632	20364	NM_146474 // Olfr1261 // olfactory receptor 1261 // 2 E1|2 // 258466 /// ENSMUST0000007	Olfr1261	NM_146474	0.296874	-3.36843	SGGFPa6-2010 down vs IFskina6-2010	0.12534	-7.97828	SGGFPa6-2011 down vs IFskina6-2011
10514313	24699	NM_206867 // Gm13280 // predicted gene 13280 // 4 C4|4 // 230398 /// ENSMUST00000105148	Gm13280	NM_206867	0.296845	-3.36876	SGGFPa6-2010 down vs IFskina6-2010	0.406425	-2.46048	SGGFPa6-2011 down vs IFskina6-2011
10566207	30537	NM_147046 // Olfr600 // olfactory receptor 600 // 7 E3|7 // 259048 /// ENSMUST000000562	Olfr600	NM_147046	0.294796	-3.39217	SGGFPa6-2010 down vs IFskina6-2010	0.427627	-2.33849	SGGFPa6-2011 down vs IFskina6-2011
10414485	14021	NM_001177508 // Olfr265 // olfactory receptor 265 // 14 C1|14 // 219019 /// ENSMUST0000	Olfr265	NM_001177508	0.294544	-3.39507	SGGFPa6-2010 down vs IFskina6-2010	0.350128	-2.8561	SGGFPa6-2011 down vs IFskina6-2011
10403038	12651	ENSMUST00000103521 // LOC382693 // similar to immunoglobulin heavy chain // 12 F2|12 //	LOC382693	ENSMUST00000103521	0.293154	-3.41117	SGGFPa6-2010 down vs IFskina6-2010	0.307557	-3.25143	SGGFPa6-2011 down vs IFskina6-2011
10445133	17305	NM_146511 // Olfr107 // olfactory receptor 107 // 17 B1|17 // 258504 /// ENSMUST0000007	Olfr107	NM_146511	0.286039	-3.49603	SGGFPa6-2010 down vs IFskina6-2010	0.367465	-2.72135	SGGFPa6-2011 down vs IFskina6-2011
10559936	29667	NM_001105191 // Vmn2r52 // vomeronasal 2, receptor 52 // 7 A1|7 // 384534 /// NM_001105	Vmn2r52	NM_001105191	0.285946	-3.49716	SGGFPa6-2010 down vs IFskina6-2010	0.334738	-2.98741	SGGFPa6-2011 down vs IFskina6-2011
10395306	11794	NM_029152 // Efcab10 // EF-hand calcium binding domain 10 // 12 A3|12 // 75040 /// ENSM	Efcab10	NM_029152	0.285487	-3.50279	SGGFPa6-2010 down vs IFskina6-2010	0.325629	-3.07098	SGGFPa6-2011 down vs IFskina6-2011
10589773	33142	NM_001164659 // Trank1 // tetratricopeptide repeat and ankyrin repeat containing 1 // 9	Trank1	NM_001164659	0.284812	-3.51108	SGGFPa6-2010 down vs IFskina6-2010	0.265358	-3.76849	SGGFPa6-2011 down vs IFskina6-2011
10484691	21468	NM_146639 // Olfr1138 // olfactory receptor 1138 // 2 E1|2 // 258632 /// ENSMUST0000009	Olfr1138	NM_146639	0.282401	-3.54106	SGGFPa6-2010 down vs IFskina6-2010	0.25961	-3.85194	SGGFPa6-2011 down vs IFskina6-2011
10542247	27587	NM_207021 // Tas2r117 // taste receptor, type 2, member 117 // 6 G1|6 63.5 cM // 353166	Tas2r117	NM_207021	0.282086	-3.54502	SGGFPa6-2010 down vs IFskina6-2010	0.424081	-2.35804	SGGFPa6-2011 down vs IFskina6-2011
10555260	29138	NM_146356 // Olfr521 // olfactory receptor 521 // 7 E3|7 // 258353 /// ENSMUST000000982	Olfr521	NM_146356	0.281233	-3.55577	SGGFPa6-2010 down vs IFskina6-2010	0.351735	-2.84305	SGGFPa6-2011 down vs IFskina6-2011
10560812	29809	NM_001166721 // Vmn1r176 // vomeronasal 1 receptor 176 // 7 A3|7 // 546943	Vmn1r176	NM_001166721	0.281122	-3.55718	SGGFPa6-2010 down vs IFskina6-2010	0.37088	-2.69629	SGGFPa6-2011 down vs IFskina6-2011
10577359	31806	NM_153108 // Defb8 // defensin beta 8 // 8 A1.3|8 // 244334	Defb8	NM_153108	0.279958	-3.57196	SGGFPa6-2010 down vs IFskina6-2010	0.201543	-4.96172	SGGFPa6-2011 down vs IFskina6-2011
10466372	19573	NM_146634 // Olfr1504 // olfactory receptor 1504 // 19 C1|19 // 258627 /// ENSMUST00000	Olfr1504	NM_146634	0.279751	-3.57461	SGGFPa6-2010 down vs IFskina6-2010	2.40349	2.40349	SGGFPa6-2011 up vs IFskina6-2011
10592192	33412	NM_001033783 // Gm5615 // predicted gene 5615 // 9 A4|9 // 434396 /// ENSMUST0000009890	Gm5615	NM_001033783	0.278517	-3.59045	SGGFPa6-2010 down vs IFskina6-2010	0.387771	-2.57884	SGGFPa6-2011 down vs IFskina6-2011
10563753	30117	NM_001034868 // Mrgprx2 // MAS-related GPR, member X2 // 7 B4|7 // 243978 /// BC141225	Mrgprx2	NM_001034868	0.272221	-3.67348	SGGFPa6-2010 down vs IFskina6-2010	0.418439	-2.38983	SGGFPa6-2011 down vs IFskina6-2011
10347662	6923	NM_177056 // Tmem198 // transmembrane protein 198 // 1 C4|1 // 319998 /// BC059868 // T	Tmem198	NM_177056	0.271615	-3.68168	SGGFPa6-2010 down vs IFskina6-2010	0.332947	-3.00348	SGGFPa6-2011 down vs IFskina6-2011				Protein Transport/Txn
10366131	8844	NM_001081246 // 1700017N19Rik // RIKEN cDNA 1700017N19 gene // 10 D1|10 // 66605 /// EN	1700017N19Rik	NM_001081246	0.271388	-3.68477	SGGFPa6-2010 down vs IFskina6-2010	0.402508	-2.48442	SGGFPa6-2011 down vs IFskina6-2011
10430739	15801	NM_021317 // Dnajb7 // DnaJ (Hsp40) homolog, subfamily B, member 7 // 15 E1|15 // 57755	Dnajb7	NM_021317	0.271346	-3.68533	SGGFPa6-2010 down vs IFskina6-2010	0.44751	-2.23459	SGGFPa6-2011 down vs IFskina6-2011
10490201	22058	NR_029649 // Mir298 // microRNA 298 // 2|2 // 723832	Mir298	NR_029649	0.270092	-3.70244	SGGFPa6-2010 down vs IFskina6-2010	0.416096	-2.40329	SGGFPa6-2011 down vs IFskina6-2011
10445176	17323	NM_146832 // Olfr134 // olfactory receptor 134 // 17 B1|17 // 258829 /// ENSMUST0000007	Olfr134	NM_146832	0.269626	-3.70885	SGGFPa6-2010 down vs IFskina6-2010	0.218648	-4.57357	SGGFPa6-2011 down vs IFskina6-2011
10565345	30411	NM_001105180 // Vmn2r65 // vomeronasal 2, receptor 65 // 7 D3|7 // 100009609 /// ENSMUS	Vmn2r65	NM_001105180	0.267975	-3.7317	SGGFPa6-2010 down vs IFskina6-2010	0.499762	-2.00095	SGGFPa6-2011 down vs IFskina6-2011
10410328	13586	NM_001076791 // Zfp874b // zinc finger protein 874b // 13 B3|13 // 408067 /// ENSMUST00	Zfp874b	NM_001076791	0.267783	-3.73437	SGGFPa6-2010 down vs IFskina6-2010	0.449746	-2.22348	SGGFPa6-2011 down vs IFskina6-2011
10442378	17052	NM_011321 // Sbp // spermine binding protein // 17 A3.3|17 // 20234 /// ENSMUST00000024	Sbp	NM_011321	0.267704	-3.73547	SGGFPa6-2010 down vs IFskina6-2010	0.481857	-2.0753	SGGFPa6-2011 down vs IFskina6-2011
10548401	28305	NM_010653 // Klrc2 // killer cell lectin-like receptor subfamily C, member 2 // 6 F3|6	Klrc2	NM_010653	0.267039	-3.74477	SGGFPa6-2010 down vs IFskina6-2010	0.198952	-5.02633	SGGFPa6-2011 down vs IFskina6-2011
10477924	20803	NM_173396 // Tgif2 // TGFB-induced factor homeobox 2 // 2 H1|2 // 228839 /// ENSMUST000	Tgif2	NM_173396	0.261909	-3.81811	SGGFPa6-2010 down vs IFskina6-2010	0.438254	-2.28178	SGGFPa6-2011 down vs IFskina6-2011
10566211	30539	NM_147070 // Olfr603 // olfactory receptor 603 // 7 E3|7 // 259073 /// ENSMUST000000718	Olfr603	NM_147070	0.261321	-3.82671	SGGFPa6-2010 down vs IFskina6-2010	0.404397	-2.47281	SGGFPa6-2011 down vs IFskina6-2011
10440125	16751	BC099383 // E330017A01Rik // RIKEN cDNA E330017A01 gene // 16 C1.2|16 // 224247 /// ENS	E330017A01Rik	BC099383	0.259973	-3.84656	SGGFPa6-2010 down vs IFskina6-2010	0.280276	-3.56792	SGGFPa6-2011 down vs IFskina6-2011
10522819	25591	NM_172881 // Ugt2b35 // UDP glucuronosyltransferase 2 family, polypeptide B35 // 5 E1|5	Ugt2b35	NM_172881	0.259184	-3.85826	SGGFPa6-2010 down vs IFskina6-2010	0.308757	-3.23879	SGGFPa6-2011 down vs IFskina6-2011
10597052	33913	NM_199036 // Fbxw15 // F-box and WD-40 domain protein 15 // 9 F2|9 // 382105 /// ENSMUS	Fbxw15	NM_199036	0.258087	-3.87467	SGGFPa6-2010 down vs IFskina6-2010	0.440419	-2.27057	SGGFPa6-2011 down vs IFskina6-2011
10346321	6814	ENSMUST00000097736 // Gm10561 // predicted gene 10561 // 1 C1.2|1 // 628004	Gm10561	ENSMUST00000097736	0.257805	-3.87891	SGGFPa6-2010 down vs IFskina6-2010	0.205921	-4.85624	SGGFPa6-2011 down vs IFskina6-2011
10548608	28332	NM_207016 // Tas2r106 // taste receptor, type 2, member 106 // 6 F3|6 62.0 cM // 387341	Tas2r106	NM_207016	0.255577	-3.91272	SGGFPa6-2010 down vs IFskina6-2010	0.458177	-2.18256	SGGFPa6-2011 down vs IFskina6-2011
10589872	33151	ENSMUST00000072612 // 4921528I07Rik // RIKEN cDNA 4921528I07 gene // 9 F3|9 // 77049	4921528I07Rik	ENSMUST00000072612	0.254356	-3.9315	SGGFPa6-2010 down vs IFskina6-2010	0.388316	-2.57522	SGGFPa6-2011 down vs IFskina6-2011				ECM/Wnt Signaling
10591220	33308	NM_146563 // Olfr18 // olfactory receptor 18 // 9 A3|9 // 18315 /// ENSMUST00000086473	Olfr18	NM_146563	0.252864	-3.95469	SGGFPa6-2010 down vs IFskina6-2010	0.253703	-3.94161	SGGFPa6-2011 down vs IFskina6-2011
10543762	27762	NM_054073 // Tsga13 // testis specific gene A13 // 6 A3.3|6 // 116732 /// ENSMUST000000	Tsga13	NM_054073	0.249806	-4.0031	SGGFPa6-2010 down vs IFskina6-2010	0.352546	-2.83651	SGGFPa6-2011 down vs IFskina6-2011				Apoptosis
10531866	26489	NM_009158 // Mapk10 // mitogen-activated protein kinase 10 // 5 E5|5 // 26414 /// NM_00	Mapk10	NM_009158	0.249698	-4.00484	SGGFPa6-2010 down vs IFskina6-2010	0.381671	-2.62006	SGGFPa6-2011 down vs IFskina6-2011
10577337	31800	NM_183039 // Defb40 // defensin beta 40 // 8 A1.3|8 // 360217 /// ENSMUST00000066258 //	Defb40	NM_183039	0.249465	-4.00857	SGGFPa6-2010 down vs IFskina6-2010	0.342999	-2.91546	SGGFPa6-2011 down vs IFskina6-2011				Receptor
10443215	17135	NM_011432 // Snrpc // U1 small nuclear ribonucleoprotein C // 17|17 B1 // 20630 /// ENS	Snrpc	NM_011432	0.245577	-4.07203	SGGFPa6-2010 down vs IFskina6-2010	0.173791	-5.75405	SGGFPa6-2011 down vs IFskina6-2011
10471776	20094	NM_146662 // Olfr365 // olfactory receptor 365 // 2 C1|2 // 258656 /// ENSMUST000000741	Olfr365	NM_146662	0.244974	-4.08207	SGGFPa6-2010 down vs IFskina6-2010	0.11419	-8.75733	SGGFPa6-2011 down vs IFskina6-2011
10584496	32642	NM_146279 // Olfr960 // olfactory receptor 960 // 9 A5|9 // 258276 /// ENSMUST000000770	Olfr960	NM_146279	0.244368	-4.0922	SGGFPa6-2010 down vs IFskina6-2010	0.1956	-5.11246	SGGFPa6-2011 down vs IFskina6-2011
10511727	24417	ENSMUST00000137780 // Cnbd1 // cyclic nucleotide binding domain containing 1 // 4 A3|4	Cnbd1	ENSMUST00000137780	0.243448	-4.10765	SGGFPa6-2010 down vs IFskina6-2010	0.387771	-2.57884	SGGFPa6-2011 down vs IFskina6-2011
10544936	27896	NM_009717 // Neurod6 // neurogenic differentiation 6 // 6 B3|6 29.0 cM // 11922 /// ENS	Neurod6	NM_009717	0.241697	-4.13741	SGGFPa6-2010 down vs IFskina6-2010	0.301871	-3.31267	SGGFPa6-2011 down vs IFskina6-2011
10532313	26540	AB010352 // AB010352 // cDNA sequence AB010352 // 5 F|5 // 545793 /// AB010352 // AB010	AB010352	AB010352	0.239592	-4.17377	SGGFPa6-2010 down vs IFskina6-2010	0.319582	-3.12909	SGGFPa6-2011 down vs IFskina6-2011
10443438	17152	NM_001034885 // Pnpla1 // patatin-like phospholipase domain containing 1 // 17 A3.3|17	Pnpla1	NM_001034885	0.234944	-4.25634	SGGFPa6-2010 down vs IFskina6-2010	0.477756	-2.09312	SGGFPa6-2011 down vs IFskina6-2011
10559750	29635	NM_030742 // Vmn1r63 // vomeronasal 1 receptor 63 // 7 A1|7 // 81017 /// ENSMUST0000007	Vmn1r63	NM_030742	0.231919	-4.31186	SGGFPa6-2010 down vs IFskina6-2010	0.36892	-2.71061	SGGFPa6-2011 down vs IFskina6-2011				Txn/Wnt Sig Path
10379996	10270	NR_029652 // Mir301 // microRNA 301 // 11|11 // 723834	Mir301	NR_029652	0.229752	-4.35252	SGGFPa6-2010 down vs IFskina6-2010	0.325629	-3.07098	SGGFPa6-2011 down vs IFskina6-2011
10385479	10833	NM_001081282 // Ibtk // inhibitor of Bruton agammaglobulinemia tyrosine kinase // 9 E3.	Ibtk	NM_001081282	0.224243	-4.45944	SGGFPa6-2010 down vs IFskina6-2010	0.308708	-3.23931	SGGFPa6-2011 down vs IFskina6-2011
10408140	13295	NM_134217 // Vmn1r205 // vomeronasal 1 receptor 205 // 13 A3.1|13 // 171251 /// ENSMUST	Vmn1r205	NM_134217	0.222122	-4.50202	SGGFPa6-2010 down vs IFskina6-2010	0.306206	-3.26578	SGGFPa6-2011 down vs IFskina6-2011
10428973	15624	NM_028992 // Gsdmc4 // gasdermin C4 // 15 D1|15 // 74548 /// ENSMUST00000063530 // Gsdm	Gsdmc4	NM_028992	0.222067	-4.50314	SGGFPa6-2010 down vs IFskina6-2010	0.233919	-4.27498	SGGFPa6-2011 down vs IFskina6-2011
10461810	19095	NM_146696 // Olfr1477 // olfactory receptor 1477 // 19 C1|19 // 258691 /// ENSMUST00000	Olfr1477	NM_146696	0.221393	-4.51685	SGGFPa6-2010 down vs IFskina6-2010	0.13508	-7.40302	SGGFPa6-2011 down vs IFskina6-2011
10604956	34961	NR_029974 // Mir452 // microRNA 452 // X|X // 723919	Mir452	NR_029974	0.220204	-4.54125	SGGFPa6-2010 down vs IFskina6-2010	0.247967	-4.03279	SGGFPa6-2011 down vs IFskina6-2011
10484594	21423	NM_146391 // Olfr1058 // olfactory receptor 1058 // 2 D|2 // 258386 /// ENSMUST00000102	Olfr1058	NM_146391	0.21933	-4.55934	SGGFPa6-2010 down vs IFskina6-2010	0.440419	-2.27057	SGGFPa6-2011 down vs IFskina6-2011
10547691	28230	ENSMUST00000100968 // Vmn2r-ps33 // vomeronasal 2, receptor, pseudogene 33 // 6 F2|6 //	Vmn2r-ps33	ENSMUST00000100968	0.216495	-4.61905	SGGFPa6-2010 down vs IFskina6-2010	0.395686	-2.52725	SGGFPa6-2011 down vs IFskina6-2011
10550815	28627	NM_030735 // Vmn1r172 // vomeronasal 1 receptor 172 // 7 A3|7 // 81010 /// ENSMUST00000	Vmn1r172	NM_030735	0.214245	-4.66755	SGGFPa6-2010 down vs IFskina6-2010	0.2902	-3.4459	SGGFPa6-2011 down vs IFskina6-2011				Txn/Receptor
10381608	10452	NM_001127576 // Gm1564 // predicted gene 1564 // 11 E1|11 // 268491 /// ENSMUST00000100	Gm1564	NM_001127576	0.213271	-4.68888	SGGFPa6-2010 down vs IFskina6-2010	0.418439	-2.38983	SGGFPa6-2011 down vs IFskina6-2011
10591203	33301	NM_146528 // Olfr860 // olfactory receptor 860 // 9 A2-A5|9 // 258521 /// ENSMUST000000	Olfr860	NM_146528	0.204434	-4.89155	SGGFPa6-2010 down vs IFskina6-2010	0.36892	-2.71061	SGGFPa6-2011 down vs IFskina6-2011
10349138	7069	NM_025867 // Serpinb11 // serine (or cysteine) peptidase inhibitor, clade B (ovalbumin)	Serpinb11	NM_025867	0.200032	-4.99919	SGGFPa6-2010 down vs IFskina6-2010	0.409017	-2.44489	SGGFPa6-2011 down vs IFskina6-2011
10399299	12228	NM_175431 // A830093I24Rik // RIKEN cDNA A830093I24 gene // 12 A1.1|12 // 207921 /// EN	A830093I24Rik	NM_175431	0.196021	-5.10149	SGGFPa6-2010 down vs IFskina6-2010	0.228907	-4.36859	SGGFPa6-2011 down vs IFskina6-2011
10559745	29634	NM_001081405 // Vmn2r28 // vomeronasal 2, receptor 28 // 7 A1|7 // 665255 /// NM_001081	Vmn2r28	NM_001081405	0.191776	-5.21442	SGGFPa6-2010 down vs IFskina6-2010	0.29648	-3.37291	SGGFPa6-2011 down vs IFskina6-2011
10488424	21858	ENSMUST00000109942 // Gm1330 // predicted gene 1330 // 2 G3|2 // 383753	Gm1330	ENSMUST00000109942	0.19064	-5.24548	SGGFPa6-2010 down vs IFskina6-2010	0.271405	-3.68453	SGGFPa6-2011 down vs IFskina6-2011
10583390	32480	NM_146565 // Olfr837 // olfactory receptor 837 // 9 A2-A5|9 // 258558 /// ENSMUST000000	Olfr837	NM_146565	0.190002	-5.2631	SGGFPa6-2010 down vs IFskina6-2010	0.2902	-3.4459	SGGFPa6-2011 down vs IFskina6-2011
10442182	17014	NM_134198 // Vmn1r234 // vomeronasal 1 receptor 234 // 17 A3.2|17 // 171232 /// ENSMUST	Vmn1r234	NM_134198	0.176646	-5.66103	SGGFPa6-2010 down vs IFskina6-2010	0.465745	-2.1471	SGGFPa6-2011 down vs IFskina6-2011
10350921	7238	NR_030441 // Mir488 // microRNA 488 // 1|1 // 735253	Mir488	NR_030441	0.172437	-5.79922	SGGFPa6-2010 down vs IFskina6-2010	0.327261	-3.05566	SGGFPa6-2011 down vs IFskina6-2011
10450897	17950	NM_001011753 // Olfr115 // olfactory receptor 115 // 17 B1|17 // 257908 /// BC139226 //	Olfr115	NM_001011753	0.165213	-6.05277	SGGFPa6-2010 down vs IFskina6-2010	0.444588	-2.24927	SGGFPa6-2011 down vs IFskina6-2011
10606530	35147	NR_029849 // Mir361 // microRNA 361 // X|X // 723850	Mir361	NR_029849	0.164348	-6.08466	SGGFPa6-2010 down vs IFskina6-2010	0.141704	-7.05696	SGGFPa6-2011 down vs IFskina6-2011
10556162	29294	NM_146724 // Olfr512 // olfactory receptor 512 // 7 E3|7 // 258719 /// ENSMUST000000747	Olfr512	NM_146724	0.16424	-6.08865	SGGFPa6-2010 down vs IFskina6-2010	0.201543	-4.96172	SGGFPa6-2011 down vs IFskina6-2011
10601531	34497	NR_003645 // Ube2dnl // ubiquitin-conjugating enzyme E2D N-terminal like // X E1|X // 2	Ube2dnl	NR_003645	0.151773	-6.58879	SGGFPa6-2010 down vs IFskina6-2010	0.481125	-2.07846	SGGFPa6-2011 down vs IFskina6-2011
10445135	17306	NM_146465 // Olfr108 // olfactory receptor 108 // 17 B1|17 // 258457 /// ENSMUST0000007	Olfr108	NM_146465	0.148173	-6.74886	SGGFPa6-2010 down vs IFskina6-2010	0.367465	-2.72135	SGGFPa6-2011 down vs IFskina6-2011
10570610	31093	NM_019728 // Defb4 // defensin beta 4 // 8 A1.3|8 // 56519 /// ENSMUST00000081017 // De	Defb4	NM_019728	0.146761	-6.81381	SGGFPa6-2010 down vs IFskina6-2010	0.445173	-2.24632	SGGFPa6-2011 down vs IFskina6-2011
10398418	12142	NR_030262 // Mir539 // microRNA 539 // 12|12 // 723917	Mir539	NR_030262	0.140835	-7.10052	SGGFPa6-2010 down vs IFskina6-2010	0.498837	-2.00466	SGGFPa6-2011 down vs IFskina6-2011
10448226	17668	AB540944 // Vmn2r111 // vomeronasal 2, receptor 111 // 17 A3.3|17 // 210876 /// ENSMUST	Vmn2r111	AB540944	0.136669	-7.31693	SGGFPa6-2010 down vs IFskina6-2010	0.390806	-2.55882	SGGFPa6-2011 down vs IFskina6-2011
10419456	14637	NM_207156 // Olfr747 // olfactory receptor 747 // 14 C1|14 // 258264 /// ENSMUST0000007	Olfr747	NM_207156	0.135793	-7.36417	SGGFPa6-2010 down vs IFskina6-2010	0.247967	-4.03279	SGGFPa6-2011 down vs IFskina6-2011
10408158	13304	NM_134237 // Vmn1r220 // vomeronasal 1 receptor 220 // 13 A3.1|13 // 171271 /// ENSMUST	Vmn1r220	NM_134237	0.129196	-7.74018	SGGFPa6-2010 down vs IFskina6-2010	0.319353	-3.13133	SGGFPa6-2011 down vs IFskina6-2011
10541627	27516	NM_001104632 // Vmn2r19 // vomeronasal 2, receptor 19 // 6 F2|6 // 232358 /// NM_001104	Vmn2r19	NM_001104632	0.129196	-7.74018	SGGFPa6-2010 down vs IFskina6-2010	0.215571	-4.63885	SGGFPa6-2011 down vs IFskina6-2011
10492002	22267	ENSMUST00000099100 // Gm10727 // predicted gene 10727 // --- // 100038630	Gm10727	ENSMUST00000099100	0.125172	-7.98899	SGGFPa6-2010 down vs IFskina6-2010	0.129119	-7.7448	SGGFPa6-2011 down vs IFskina6-2011
10560366	29736	NM_054063 // Psg28 // pregnancy-specific glycoprotein 28 // 7 A2|7 // 114871 /// ENSMUS	Psg28	NM_054063	0.11871	-8.42389	SGGFPa6-2010 down vs IFskina6-2010	0.326431	-3.06344	SGGFPa6-2011 down vs IFskina6-2011
10493876	22468	NM_011474 // Sprr2h // small proline-rich protein 2H // 3 F1|3 45.2 cM // 20762 /// ENS	Sprr2h	NM_011474	0.0927017	-10.7873	SGGFPa6-2010 down vs IFskina6-2010	0.368146	-2.71631	SGGFPa6-2011 down vs IFskina6-2011
10489456	21981	NM_173377 // Svs3b // seminal vesicle secretory protein 3B // 2 H3|2 // 329557 /// ENSM	Svs3b	NM_173377	0.0547315	-18.271	SGGFPa6-2010 down vs IFskina6-2010	0.305333	-3.27512	SGGFPa6-2011 down vs IFskina6-2011
