# Supplementary material for: Label Retaining Cells (LRCs) with Myoepithelial Characteristic from the Proximal Acinar Region Define Stem Cells in the Sweat Gland
Source: PLoS One. 2013 Sep 18;8(9):e74174. doi: 10.1371/journal.pone.0074174 (PMC3776797; doi:10.1371/journal.pone.0074174)
Supplement: Table S3 — Unique DEG list for SG non-LRCs. Functionally categorized list of genes identified in the basal layer SG non-LRCs (GFP−/α6+) when compared to the basal layer of the sole’s epidermis. (XLSX) [file pone.0074174.s005.xlsx]

## Sheet: unique DEG-SGa6 vs IFskina6-exp
Column #	Transcript ID	gene_assignment	Gene Symbol	RefSeq	Ratio(SGa62010 vs. IFskina6-2010)	Fold-Change(SGa62010 vs. IFskina6-2010)	Fold-Change(SGa62010 vs. IFskina6-2010) (Description)	Ratio(SGa6-2011 vs. IFskina6-2011)	Fold-Change(SGa6-2011 vs. IFskina6-2011)	Fold-Change(SGa6-2011 vs. IFskina6-2011) (Description)
11156	10388705	AK137634 // LOC100038422 // hypothetical LOC100038422 // --- // 100038422	LOC100038422	AK137634	0.111618	-8.95916	SGa62010 down vs IFskina6-2010	0.498027	-2.00792	SGa6-2011 down vs IFskina6-2011
35107	10606182	NR_030558 // Mir421 // microRNA 421 // X|X // 100124494	Mir421	NR_030558	0.172495	-5.79726	SGa62010 down vs IFskina6-2010	0.133661	-7.48162	SGa6-2011 down vs IFskina6-2011
20328	10473557	NM_146658 // Olfr1131 // olfactory receptor 1131 // 2 E1|2 // 258652 /// ENSMUST0000009	Olfr1131	NM_146658	0.176755	-5.65754	SGa62010 down vs IFskina6-2010	0.424526	-2.35557	SGa6-2011 down vs IFskina6-2011
14705	10420021	NM_133734 // Dcaf11 // DDB1 and CUL4 associated factor 11 // 14 C3|14 24.5 cM // 28199	Dcaf11	NM_133734	0.179461	-5.57225	SGa62010 down vs IFskina6-2010	0.477835	-2.09277	SGa6-2011 down vs IFskina6-2011
14063	10414731	ENSMUST00000103577 // Gm701 // predicted gene 701 // 14 C2|14 // 277146	Gm701	ENSMUST00000103577	0.18262	-5.47584	SGa62010 down vs IFskina6-2010	0.23567	-4.24323	SGa6-2011 down vs IFskina6-2011
29271	10556115	NM_146774 // Olfr472 // olfactory receptor 472 // 7 E3|7 // 258770 /// ENSMUST000000847	Olfr472	NM_146774	0.186533	-5.36099	SGa62010 down vs IFskina6-2010	0.452866	-2.20816	SGa6-2011 down vs IFskina6-2011
12741	10403919	NM_016684 // Zscan12 // zinc finger and SCAN domain containing 12 // 13 A3.1|13 // 2275	Zscan12	NM_016684	0.187905	-5.32183	SGa62010 down vs IFskina6-2010	0.337267	-2.96501	SGa6-2011 down vs IFskina6-2011
16395	10436770	ENSMUST00000062524 // Gm9789 // predicted gene 9789 // 16 C3.3|16 // 640627	Gm9789	ENSMUST00000062524	0.194069	-5.15281	SGa62010 down vs IFskina6-2010	0.149172	-6.70368	SGa6-2011 down vs IFskina6-2011
9602	10373612	NM_146864 // Olfr768 // olfactory receptor 768 // 10 D3|10 // 258863 /// ENSMUST0000006	Olfr768	NM_146864	0.201149	-4.97143	SGa62010 down vs IFskina6-2010	0.414973	-2.4098	SGa6-2011 down vs IFskina6-2011
18150	10452935	BC019508 // Heatr5b // HEAT repeat containing 5B // 17 E3|17 // 320473	Heatr5b	BC019508	0.202546	-4.93714	SGa62010 down vs IFskina6-2010	0.207129	-4.8279	SGa6-2011 down vs IFskina6-2011
12059	10397984	NM_028980 // Ppp4r4 // protein phosphatase 4, regulatory subunit 4 // 12|12 F1 // 74521	Ppp4r4	NM_028980	0.214345	-4.66537	SGa62010 down vs IFskina6-2010	0.495097	-2.01981	SGa6-2011 down vs IFskina6-2011
9600	10373608	ENSMUST00000091994 // Olfr766 // olfactory receptor 766 // 10 D3|10 // 546487	Olfr766	ENSMUST00000091994	0.2147	-4.65765	SGa62010 down vs IFskina6-2010	0.273359	-3.65819	SGa6-2011 down vs IFskina6-2011
19911	10469755	NM_027635 // 4931423N10Rik // RIKEN cDNA 4931423N10 gene // 2 A3|2 // 70981 /// ENSMUST	4931423N10Rik	NM_027635	0.220644	-4.53218	SGa62010 down vs IFskina6-2010	0.334129	-2.99286	SGa6-2011 down vs IFskina6-2011
14653	10419568	NM_053113 // Ear11 // eosinophil-associated, ribonuclease A family, member 11 // 14 C1|	Ear11	NM_053113	0.222076	-4.50296	SGa62010 down vs IFskina6-2010	0.452135	-2.21173	SGa6-2011 down vs IFskina6-2011
19854	10469231	NR_030472 // Mir467b // microRNA 467b // 2|2 // 735257	Mir467b	NR_030472	0.223508	-4.47412	SGa62010 down vs IFskina6-2010	0.484765	-2.06286	SGa6-2011 down vs IFskina6-2011
7071	10349157	NM_001174170 // Serpinb2 // serine (or cysteine) peptidase inhibitor, clade B, member 2	Serpinb2	NM_001174170	0.223604	-4.47219	SGa62010 down vs IFskina6-2010	0.241829	-4.13516	SGa6-2011 down vs IFskina6-2011
19161	10462357	NR_029778 // Mir101b // microRNA 101b // 19|19 // 724062	Mir101b	NR_029778	0.240623	-4.15587	SGa62010 down vs IFskina6-2010	0.498403	-2.00641	SGa6-2011 down vs IFskina6-2011
15943	10432431	NM_001081254 // Fam186b // family with sequence similarity 186, member B // 15 F1|15 //	Fam186b	NM_001081254	0.242055	-4.13129	SGa62010 down vs IFskina6-2010	0.484836	-2.06255	SGa6-2011 down vs IFskina6-2011
16612	10438813	NR_030463 // Mir690 // microRNA 690 // 16 B2|16 // 751543	Mir690	NR_030463	0.244991	-4.08178	SGa62010 down vs IFskina6-2010	0.340601	-2.93598	SGa6-2011 down vs IFskina6-2011
15504	10427991	NM_001081302 // Trio // triple functional domain (PTPRF interacting) // 15 B1|15 // 223	Trio	NM_001081302	0.251075	-3.98287	SGa62010 down vs IFskina6-2010	0.246461	-4.05743	SGa6-2011 down vs IFskina6-2011
14139	10415015	X63928 // Gm13949 // predicted gene 13949 // 14 C1|14 // 386450	Gm13949	X63928	0.251122	-3.98213	SGa62010 down vs IFskina6-2010	0.474157	-2.10901	SGa6-2011 down vs IFskina6-2011
32163	10580624	NM_007954 // Ces1c // carboxylesterase 1C // 8 C5|8 43.0 cM // 13884 /// ENSMUST0000003	Ces1c	NM_007954	0.251678	-3.97333	SGa62010 down vs IFskina6-2010	0.224112	-4.46205	SGa6-2011 down vs IFskina6-2011
13564	10410214	ENSMUST00000059329 // Gm10772 // predicted gene 10772 // 13|13 // 100423045 /// AB01037	Gm10772	ENSMUST00000059329	0.253306	-3.9478	SGa62010 down vs IFskina6-2010	0.466877	-2.14189	SGa6-2011 down vs IFskina6-2011
30321	10564373	ENSMUST00000098392 // Gm10624 // predicted gene 10624 // --- // 100038420	Gm10624	ENSMUST00000098392	0.256218	-3.90293	SGa62010 down vs IFskina6-2010	0.395912	-2.52581	SGa6-2011 down vs IFskina6-2011
34167	10599008	NM_020049 // Slc6a14 // solute carrier family 6 (neurotransmitter transporter), member	Slc6a14	NM_020049	0.261654	-3.82185	SGa62010 down vs IFskina6-2010	0.212735	-4.70069	SGa6-2011 down vs IFskina6-2011
19792	10468851	NR_034047 // Snora19 // small nucleolar RNA, H/ACA box 19 // 19|19 // 100217439	Snora19	NR_034047	0.264835	-3.77594	SGa62010 down vs IFskina6-2010	0.430627	-2.32219	SGa6-2011 down vs IFskina6-2011
15740	10430166	NM_029419 // Apol7a // apolipoprotein L 7a // 15 E1|15 // 75761 /// NM_001164640 // Apo	Apol7a	NM_029419	0.267083	-3.74416	SGa62010 down vs IFskina6-2010	0.375052	-2.6663	SGa6-2011 down vs IFskina6-2011
12848	10404487	NM_001076790 // Serpinb6d // serine (or cysteine) peptidase inhibitor, clade B, member	Serpinb6d	NM_001076790	0.270352	-3.69889	SGa62010 down vs IFskina6-2010	0.296747	-3.36988	SGa6-2011 down vs IFskina6-2011
34563	10601901	NM_027067 // 1700014N06Rik // RIKEN cDNA 1700014N06 gene // X F1|X // 69389 /// BC11707	1700014N06Rik	NM_027067	0.277296	-3.60626	SGa62010 down vs IFskina6-2010	0.375052	-2.6663	SGa6-2011 down vs IFskina6-2011
13288	10408125	ENSMUST00000054679 // Vmn1r190-ps // vomeronasal 1 receptor 190, pseudogene // 13 A3.1|	Vmn1r190-ps	ENSMUST00000054679	0.284383	-3.51639	SGa62010 down vs IFskina6-2010	0.309081	-3.2354	SGa6-2011 down vs IFskina6-2011
34377	10600576	NM_001126321 // Gm14743 // predicted gene 14743 // X B|X // 236874 /// ENSMUST000000881	Gm14743	NM_001126321	0.285549	-3.50203	SGa62010 down vs IFskina6-2010	0.236398	-4.23016	SGa6-2011 down vs IFskina6-2011
14109	10414914	ENSMUST00000103635 // Trav14n-3 // T cell receptor alpha variable 14N-3 // 14 C2|14 //	Trav14n-3	ENSMUST00000103635	0.293141	-3.41133	SGa62010 down vs IFskina6-2010	0.283287	-3.52999	SGa6-2011 down vs IFskina6-2011
27392	10540289	NR_027989 // Gm9871 // predicted gene 9871 // 6 D3|6 // 207157 /// ENSMUST00000064002 /	Gm9871	NR_027989	0.294161	-3.3995	SGa62010 down vs IFskina6-2010	0.416619	-2.40028	SGa6-2011 down vs IFskina6-2011
21514	10484793	NM_146892 // Olfr1223 // olfactory receptor 1223 // 2 E1|2 // 258894 /// ENSMUST0000011	Olfr1223	NM_146892	0.295536	-3.38368	SGa62010 down vs IFskina6-2010	0.418439	-2.38983	SGa6-2011 down vs IFskina6-2011
21653	10485786	NM_146886 // Olfr1298 // olfactory receptor 1298 // 2 E5|2 // 258888 /// ENSMUST0000009	Olfr1298	NM_146886	0.298721	-3.3476	SGa62010 down vs IFskina6-2010	0.24085	-4.15196	SGa6-2011 down vs IFskina6-2011
32630	10584468	NM_207560 // Olfr924 // olfactory receptor 924 // 9 A5.1|9 // 404322 /// ENSMUST0000007	Olfr924	NM_207560	0.298721	-3.3476	SGa62010 down vs IFskina6-2010	0.2902	-3.4459	SGa6-2011 down vs IFskina6-2011
30092	10563611	NM_009117 // Saa1 // serum amyloid A 1 // 7 B4|7 23.5 cM // 20208 /// ENSMUST0000012808	Saa1	NM_009117	0.30167	-3.31488	SGa62010 down vs IFskina6-2010	0.195644	-5.11131	SGa6-2011 down vs IFskina6-2011
20318	10473531	NM_146348 // Olfr1121 // olfactory receptor 1121 // 2 E1|2 // 258345 /// ENSMUST0000006	Olfr1121	NM_146348	0.302673	-3.3039	SGa62010 down vs IFskina6-2010	0.395184	-2.53046	SGa6-2011 down vs IFskina6-2011				Cytoskeleton
21121	10481103	NM_010695 // Lcn4 // lipocalin 4 // 2 A3|2 // 16821 /// ENSMUST00000028283 // Lcn4 // l	Lcn4	NM_010695	0.303621	-3.29358	SGa62010 down vs IFskina6-2010	0.400537	-2.49665	SGa6-2011 down vs IFskina6-2011
12710	10403579	NM_181852 // Prl2c5 // prolactin family 2, subfamily c, member 5 // 13 A1|13 // 107849	Prl2c5	NM_181852	0.30406	-3.28882	SGa62010 down vs IFskina6-2010	0.408499	-2.44799	SGa6-2011 down vs IFskina6-2011
7182	10350339	NR_029795 // Mir181a-1 // microRNA 181a-1 // 1|1 // 735252	Mir181a-1	NR_029795	0.306835	-3.25908	SGa62010 down vs IFskina6-2010	0.30195	-3.31181	SGa6-2011 down vs IFskina6-2011
33043	10588495	NM_153459 // Dusp7 // dual specificity phosphatase 7 // 9 F1|9 // 235584 /// ENSMUST000	Dusp7	NM_153459	0.307561	-3.25138	SGa62010 down vs IFskina6-2010	0.40495	-2.46944	SGa6-2011 down vs IFskina6-2011
34647	10602744	ENSMUST00000112542 // Gm15155 // predicted gene 15155 // --- // 791339 /// ENSMUST00000	Gm15155	ENSMUST00000112542	0.314041	-3.1843	SGa62010 down vs IFskina6-2010	0.31638	-3.16076	SGa6-2011 down vs IFskina6-2011
29211	10555811	NM_147097 // Olfr628 // olfactory receptor 628 // 7 E3|7 // 259159 /// ENSMUST000000981	Olfr628	NM_147097	0.314089	-3.18381	SGa62010 down vs IFskina6-2010	0.475036	-2.1051	SGa6-2011 down vs IFskina6-2011
17957	10450912	NM_001005481 // Olfr132 // olfactory receptor 132 // 17 B1|17 // 257889 /// ENSMUST0000	Olfr132	NM_001005481	0.314373	-3.18094	SGa62010 down vs IFskina6-2010	0.42253	-2.3667	SGa6-2011 down vs IFskina6-2011
26541	10532315	AB010352 // AB010352 // cDNA sequence AB010352 // 5 F|5 // 545793 /// AB010352 // AB010	AB010352	AB010352	0.317768	-3.14695	SGa62010 down vs IFskina6-2010	0.340612	-2.93589	SGa6-2011 down vs IFskina6-2011
19103	10461828	NM_146990 // Olfr1494 // olfactory receptor 1494 // 19 C1|19 // 258992 /// ENSMUST00000	Olfr1494	NM_146990	0.320097	-3.12405	SGa62010 down vs IFskina6-2010	0.282248	-3.54298	SGa6-2011 down vs IFskina6-2011
18571	10457077	NM_015798 // Fbxo15 // F-box protein 15 // 18 E4|18 // 50764 /// ENSMUST00000037718 //	Fbxo15	NM_015798	0.324574	-3.08096	SGa62010 down vs IFskina6-2010	0.2985	-3.35009	SGa6-2011 down vs IFskina6-2011
28555	10550322	NM_011927 // Ceacam9 // carcinoembryonic antigen-related cell adhesion molecule 9 // 7	Ceacam9	NM_011927	0.324852	-3.07833	SGa62010 down vs IFskina6-2010	0.416793	-2.39927	SGa6-2011 down vs IFskina6-2011
16655	10439282	NM_001033239 // Csta // cystatin A // 16 B3|16 // 209294 /// ENSMUST00000096090 // Csta	Csta	NM_001033239	0.325739	-3.06994	SGa62010 down vs IFskina6-2010	0.202674	-4.93403	SGa6-2011 down vs IFskina6-2011
20691	10476874	NM_008780 // Pax1 // paired box gene 1 // 2 G2|2 82.0 cM // 18503 /// ENSMUST0000010996	Pax1	NM_008780	0.326928	-3.05878	SGa62010 down vs IFskina6-2010	0.45501	-2.19775	SGa6-2011 down vs IFskina6-2011
14669	10419713	NM_146432 // Olfr1512 // olfactory receptor 1512 // 14 C1-C2|14 // 258424 /// ENSMUST00	Olfr1512	NM_146432	0.327768	-3.05094	SGa62010 down vs IFskina6-2010	0.402359	-2.48534	SGa6-2011 down vs IFskina6-2011
29104	10554958	ENSMUST00000098304 // Gm10607 // predicted gene 10607 // --- // 100038619	Gm10607	ENSMUST00000098304	0.328345	-3.04558	SGa62010 down vs IFskina6-2010	0.476727	-2.09764	SGa6-2011 down vs IFskina6-2011				Apoptosis
14025	10414493	NM_001011837 // Olfr748 // olfactory receptor 748 // 14 C1|14 // 258113 /// ENSMUST0000	Olfr748	NM_001011837	0.328772	-3.04162	SGa62010 down vs IFskina6-2010	0.465137	-2.1499	SGa6-2011 down vs IFskina6-2011
23364	10501942	BC137977 // 1700006A11Rik // RIKEN cDNA 1700006A11 gene // 3 G1|3 // 71824 /// ENSMUST0	1700006A11Rik	BC137977	0.330915	-3.02193	SGa62010 down vs IFskina6-2010	0.424315	-2.35674	SGa6-2011 down vs IFskina6-2011
29063	10554650	ENSMUST00000032872 // 1700010L04Rik // RIKEN cDNA 1700010L04 gene // 7 D3|7 // 619808	1700010L04Rik	ENSMUST00000032872	0.332508	-3.00744	SGa62010 down vs IFskina6-2010	0.438605	-2.27995	SGa6-2011 down vs IFskina6-2011
33240	10590781	NM_032007 // Mmp1b // matrix metallopeptidase 1b (interstitial collagenase) // 9 A1|9 /	Mmp1b	NM_032007	0.332622	-3.00642	SGa62010 down vs IFskina6-2010	0.456541	-2.19038	SGa6-2011 down vs IFskina6-2011
7752	10355960	NM_009129 // Scg2 // secretogranin II // 1 C4|1 43.6 cM // 20254 /// ENSMUST00000049972	Scg2	NM_009129	0.334798	-2.98687	SGa62010 down vs IFskina6-2010	0.499616	-2.00154	SGa6-2011 down vs IFskina6-2011
25240	10519203	NM_001033394 // Tmem88b // transmembrane protein 88B // 4 E2|4 // 320587 /// ENSMUST000	Tmem88b	NM_001033394	0.335763	-2.97829	SGa62010 down vs IFskina6-2010	0.414399	-2.41314	SGa6-2011 down vs IFskina6-2011
9110	10368484	ENSMUST00000070359 // Gm9996 // predicted gene 9996 // --- // 791368	Gm9996	ENSMUST00000070359	0.336102	-2.97529	SGa62010 down vs IFskina6-2010	0.258743	-3.86484	SGa6-2011 down vs IFskina6-2011
33871	10596543	NM_030730 // Rad54l2 // RAD54 like 2 (S. cerevisiae) // 9 F1|9 // 81000 /// ENSMUST0000	Rad54l2	NM_030730	0.336582	-2.97105	SGa62010 down vs IFskina6-2010	0.241793	-4.13578	SGa6-2011 down vs IFskina6-2011
28570	10550439	NM_028480 // Ceacam5 // carcinoembryonic antigen-related cell adhesion molecule 5 // 7	Ceacam5	NM_028480	0.337167	-2.96589	SGa62010 down vs IFskina6-2010	0.367265	-2.72283	SGa6-2011 down vs IFskina6-2011
21137	10481272	BC099566 // 1700007K13Rik // RIKEN cDNA 1700007K13 gene // 2 A3|2 // 69327 /// AY927869	1700007K13Rik	BC099566	0.339543	-2.94514	SGa62010 down vs IFskina6-2010	0.446037	-2.24196	SGa6-2011 down vs IFskina6-2011
7327	10351667	NM_013730 // Slamf1 // signaling lymphocytic activation molecule family member 1 // 1 H	Slamf1	NM_013730	0.340893	-2.93347	SGa62010 down vs IFskina6-2010	0.381796	-2.6192	SGa6-2011 down vs IFskina6-2011
21507	10484777	NM_146893 // Olfr1216 // olfactory receptor 1216 // 2 E1|2 // 258895 /// ENSMUST0000009	Olfr1216	NM_146893	0.341504	-2.92822	SGa62010 down vs IFskina6-2010	0.289476	-3.45452	SGa6-2011 down vs IFskina6-2011
34904	10604653	NM_001009549 // Zfp36l3 // zinc finger protein 36, C3H type-like 3 // X A5|X // 333473	Zfp36l3	NM_001009549	0.342004	-2.92394	SGa62010 down vs IFskina6-2010	0.312507	-3.19993	SGa6-2011 down vs IFskina6-2011				Apoptosis/Cell Adhesion
18893	10460123	BC098197 // 9330132A10Rik // RIKEN cDNA 9330132A10 gene // 18 E4|18 // 319609	9330132A10Rik	BC098197	0.343782	-2.90882	SGa62010 down vs IFskina6-2010	0.225169	-4.4411	SGa6-2011 down vs IFskina6-2011
7024	10348670	NM_181405 // Rnpepl1 // arginyl aminopeptidase (aminopeptidase B)-like 1 // 1 D|1 // 10	Rnpepl1	NM_181405	0.343863	-2.90814	SGa62010 down vs IFskina6-2010	0.464556	-2.15259	SGa6-2011 down vs IFskina6-2011
12235	10399357	NM_013527 // Gdf7 // growth differentiation factor 7 // 12 A1.1|12 // 238057 /// AF5257	Gdf7	NM_013527	0.344325	-2.90423	SGa62010 down vs IFskina6-2010	0.488595	-2.04669	SGa6-2011 down vs IFskina6-2011
12765	10403992	NM_134220 // Vmn1r198 // vomeronasal 1 receptor 198 // 13 A3.1|13 // 171254 /// ENSMUST	Vmn1r198	NM_134220	0.344466	-2.90304	SGa62010 down vs IFskina6-2010	0.293916	-3.40233	SGa6-2011 down vs IFskina6-2011
14967	10422748	NM_013485 // C9 // complement component 9 // 15 A1|15 // 12279 /// ENSMUST00000022749 /	C9	NM_013485	0.347389	-2.87861	SGa62010 down vs IFskina6-2010	0.348597	-2.86865	SGa6-2011 down vs IFskina6-2011
23556	10503520	NM_015767 // Ttpa // tocopherol (alpha) transfer protein // 4 A3|4 22.7 cM // 50500 ///	Ttpa	NM_015767	0.34973	-2.85935	SGa62010 down vs IFskina6-2010	0.237379	-4.21267	SGa6-2011 down vs IFskina6-2011
21641	10485745	NM_001128103 // Ano3 // anoctamin 3 // 2 E3|2 // 228432 /// ENSMUST00000099623 // Ano3	Ano3	NM_001128103	0.349936	-2.85766	SGa62010 down vs IFskina6-2010	0.421786	-2.37087	SGa6-2011 down vs IFskina6-2011
21867	10488459	NM_001177550 // Zfp442 // zinc finger protein 442 // 2 G3|2 // 668923 /// ENSMUST000001	Zfp442	NM_001177550	0.35048	-2.85323	SGa62010 down vs IFskina6-2010	0.298923	-3.34535	SGa6-2011 down vs IFskina6-2011
26654	10533320	NM_172125 // Adam1b // a disintegrin and metallopeptidase domain 1b // 5 F|5 // 280667	Adam1b	NM_172125	0.356478	-2.80523	SGa62010 down vs IFskina6-2010	0.42808	-2.33601	SGa6-2011 down vs IFskina6-2011
7301	10351487	NM_001109985 // Nos1ap // nitric oxide synthase 1 (neuronal) adaptor protein // 1|1 H2	Nos1ap	NM_001109985	0.357007	-2.80107	SGa62010 down vs IFskina6-2010	0.404699	-2.47097	SGa6-2011 down vs IFskina6-2011
21784	10487619	ENSMUST00000086387 // Gm10183 // predicted gene 10183 // --- // 100038393	Gm10183	ENSMUST00000086387	0.357049	-2.80074	SGa62010 down vs IFskina6-2010	0.368146	-2.71631	SGa6-2011 down vs IFskina6-2011
15429	10427399	NM_001166063 // Ccdc152 // coiled-coil domain containing 152 // 15 A1|15 // 100039139	Ccdc152	NM_001166063	0.357432	-2.79774	SGa62010 down vs IFskina6-2010	0.448489	-2.22971	SGa6-2011 down vs IFskina6-2011
6671	10344950	XR_107233 // Gm7634 // predicted gene 7634 // 1 A3|1 // 665434 /// XR_104530 // Gm7634	Gm7634	XR_107233	0.357452	-2.79758	SGa62010 down vs IFskina6-2010	0.379659	-2.63395	SGa6-2011 down vs IFskina6-2011
28387	10548951	NM_001128090 // Rergl // RERG/RAS-like // 6 G2|6 // 632971 /// BC147153 // Rergl // RER	Rergl	NM_001128090	0.357707	-2.79559	SGa62010 down vs IFskina6-2010	0.313349	-3.19133	SGa6-2011 down vs IFskina6-2011
8411	10362152	NM_001008429 // Taar3 // trace amine-associated receptor 3 // 10 A4|10 // 493809 /// EN	Taar3	NM_001008429	0.358128	-2.7923	SGa62010 down vs IFskina6-2010	0.377674	-2.64779	SGa6-2011 down vs IFskina6-2011
10390	10381101	NM_001177484 // Gm11559 // predicted gene 11559 // 11 D // 100415785 /// ENSMUST0000009	Gm11559	NM_001177484	0.35888	-2.78644	SGa62010 down vs IFskina6-2010	0.444525	-2.24959	SGa6-2011 down vs IFskina6-2011
7051	10348947	NM_027584 // Slco6d1 // solute carrier organic anion transporter family, member 6d1 //	Slco6d1	NM_027584	0.362965	-2.75509	SGa62010 down vs IFskina6-2010	0.464988	-2.15059	SGa6-2011 down vs IFskina6-2011
30645	10566624	NM_001162940 // Gm10081 // predicted gene 10081 // 7 E3|7 // 384732 /// ENSMUST00000076	Gm10081	NM_001162940	0.364115	-2.74639	SGa62010 down vs IFskina6-2010	0.30647	-3.26296	SGa6-2011 down vs IFskina6-2011				Cytoskeleton
35142	10606473	AK034060 // Gm9927 // predicted gene 9927 // X D|X // 331513 /// ENSMUST00000113422 //	Gm9927	AK034060	0.364332	-2.74475	SGa62010 down vs IFskina6-2010	0.406263	-2.46146	SGa6-2011 down vs IFskina6-2011
9622	10373653	NM_146670 // Olfr815 // olfactory receptor 815 // 10 D3|10 // 258665 /// ENSMUST0000007	Olfr815	NM_146670	0.364773	-2.74143	SGa62010 down vs IFskina6-2010	0.21717	-4.60469	SGa6-2011 down vs IFskina6-2011				ECM
28009	10545569	NM_011260 // Reg3g // regenerating islet-derived 3 gamma // 6 C3|6 // 19695 /// ENSMUST	Reg3g	NM_011260	0.364843	-2.7409	SGa62010 down vs IFskina6-2010	0.351868	-2.84198	SGa6-2011 down vs IFskina6-2011
11118	10388292	NM_147007 // Olfr394 // olfactory receptor 394 // 11 B4|11 // 259009 /// ENSMUST0000007	Olfr394	NM_147007	0.365635	-2.73497	SGa62010 down vs IFskina6-2010	0.378643	-2.64101	SGa6-2011 down vs IFskina6-2011
21176	10481627	NM_008491 // Lcn2 // lipocalin 2 // 2 A3|2 27.0 cM // 16819 /// ENSMUST00000050785 // L	Lcn2	NM_008491	0.365767	-2.73398	SGa62010 down vs IFskina6-2010	0.199061	-5.02358	SGa6-2011 down vs IFskina6-2011
27519	10541634	NM_001104639 // Vmn2r24 // vomeronasal 2, receptor 24 // 6 F2|6 // 243628 /// ENSMUST00	Vmn2r24	NM_001104639	0.366513	-2.72841	SGa62010 down vs IFskina6-2010	0.393601	-2.54065	SGa6-2011 down vs IFskina6-2011
34432	10600969	NR_030525 // Mir676 // microRNA 676 // X|X // 751534	Mir676	NR_030525	0.366563	-2.72804	SGa62010 down vs IFskina6-2010	0.465745	-2.1471	SGa6-2011 down vs IFskina6-2011
21298	10483299	NM_018733 // Scn1a // sodium channel, voltage-gated, type I, alpha // 2 C1.3|2 36.0 cM	Scn1a	NM_018733	0.366563	-2.72804	SGa62010 down vs IFskina6-2010	0.442411	-2.26034	SGa6-2011 down vs IFskina6-2011
33480	10592725	ENSMUST00000098856 // Gm10688 // predicted gene 10688 // --- // 100038652	Gm10688	ENSMUST00000098856	0.366597	-2.72779	SGa62010 down vs IFskina6-2010	0.405666	-2.46508	SGa6-2011 down vs IFskina6-2011				Apoptosis
14657	10419594	NM_001011687 // Rnase13 // ribonuclease, RNase A family, 13 (non-active) // 14|14 B-C1	Rnase13	NM_001011687	0.368395	-2.71448	SGa62010 down vs IFskina6-2010	0.451088	-2.21686	SGa6-2011 down vs IFskina6-2011
11205	10389143	NM_181545 // Slfn8 // schlafen 8 // 11 C|11 // 276950 /// NM_001167743 // Slfn8 // schl	Slfn8	NM_181545	0.368694	-2.71227	SGa62010 down vs IFskina6-2010	0.33005	-3.02985	SGa6-2011 down vs IFskina6-2011
33673	10594750	NM_001163143 // C2cd4a // C2 calcium-dependent domain containing 4A // 9 C|9 // 244911	C2cd4a	NM_001163143	0.370416	-2.69966	SGa62010 down vs IFskina6-2010	0.457365	-2.18644	SGa6-2011 down vs IFskina6-2011
7937	10357927	NR_026896 // 4931440L10Rik // RIKEN cDNA 4931440L10 gene // 1 E4|1 // 71001 /// NM_0011	4931440L10Rik	NR_026896	0.370695	-2.69764	SGa62010 down vs IFskina6-2010	0.460248	-2.17274	SGa6-2011 down vs IFskina6-2011
11127	10388310	NM_001015046 // Rap1gap2 // RAP1 GTPase activating protein 2 // 11 B5|11 // 380711 ///	Rap1gap2	NM_001015046	0.372173	-2.68692	SGa62010 down vs IFskina6-2010	0.459612	-2.17575	SGa6-2011 down vs IFskina6-2011
16772	10440174	NM_146994 // Olfr201 // olfactory receptor 201 // 16 C2|16 // 258996 /// ENSMUST0000009	Olfr201	NM_146994	0.372356	-2.6856	SGa62010 down vs IFskina6-2010	0.349876	-2.85816	SGa6-2011 down vs IFskina6-2011
7821	10356675	NM_147039 // Olfr1414 // olfactory receptor 1414 // 1 D-E1|1 // 259041 /// ENSMUST00000	Olfr1414	NM_147039	0.373339	-2.67853	SGa62010 down vs IFskina6-2010	0.482543	-2.07235	SGa6-2011 down vs IFskina6-2011
18473	10456171	NM_177829 // Spink10 // serine peptidase inhibitor, Kazal type 10 // 18 E1|18 // 328971	Spink10	NM_177829	0.373498	-2.67739	SGa62010 down vs IFskina6-2010	0.497244	-2.01108	SGa6-2011 down vs IFskina6-2011
20419	10474221	ENSMUST00000104891 // Gm10912 // predicted gene 10912 // 2 E2|2 // 100038697	Gm10912	ENSMUST00000104891	0.374079	-2.67323	SGa62010 down vs IFskina6-2010	0.498465	-2.00616	SGa6-2011 down vs IFskina6-2011
34882	10604585	NR_030497 // Mir717 // microRNA 717 // X|X // 751531	Mir717	NR_030497	0.375714	-2.6616	SGa62010 down vs IFskina6-2010	0.15388	-6.49856	SGa6-2011 down vs IFskina6-2011
10747	10384615	NM_011023 // Otx1 // orthodenticle homolog 1 (Drosophila) // 11 A3.2|11 12.0 cM // 1842	Otx1	NM_011023	0.380348	-2.62917	SGa62010 down vs IFskina6-2010	0.289982	-3.44849	SGa6-2011 down vs IFskina6-2011
26601	10532857	NM_019821 // Gltp // glycolipid transfer protein // 5 F|5 // 56356 /// ENSMUST000000120	Gltp	NM_019821	0.38045	-2.62846	SGa62010 down vs IFskina6-2010	0.331387	-3.01762	SGa6-2011 down vs IFskina6-2011
34582	10602081	NM_030181 // Vsig1 // V-set and immunoglobulin domain containing 1 // X F1|X // 78789 /	Vsig1	NM_030181	0.38059	-2.6275	SGa62010 down vs IFskina6-2010	0.452006	-2.21236	SGa6-2011 down vs IFskina6-2011
30524	10566172	NM_130866 // Olfr78 // olfactory receptor 78 // 7 E3|7 // 170639 /// NM_147113 // Olfr5	Olfr78	NM_130866	0.380969	-2.62489	SGa62010 down vs IFskina6-2010	0.327261	-3.05566	SGa6-2011 down vs IFskina6-2011
13522	10409896	NM_029636 // Ctsq // cathepsin Q // 13 B3|13 35.0 cM // 104002 /// ENSMUST00000021888 /	Ctsq	NM_029636	0.381038	-2.62441	SGa62010 down vs IFskina6-2010	0.363174	-2.7535	SGa6-2011 down vs IFskina6-2011
15391	10427070	NM_010667 // Krt86 // keratin 86 // 15 F2|15 58.71 cM // 16679 /// ENSMUST00000088049 /	Krt86	NM_010667	0.381367	-2.62215	SGa62010 down vs IFskina6-2010	0.341408	-2.92905	SGa6-2011 down vs IFskina6-2011
19559	10466342	NM_146700 // Olfr1453 // olfactory receptor 1453 // 19 C1|19 // 258695 /// ENSMUST00000	Olfr1453	NM_146700	0.383467	-2.60779	SGa62010 down vs IFskina6-2010	0.402117	-2.48684	SGa6-2011 down vs IFskina6-2011
33620	10594183	NM_001172068 // Senp8 // SUMO/sentrin specific peptidase 8 // 9|9 C // 71599 /// NM_001	Senp8	NM_001172068	0.383997	-2.60419	SGa62010 down vs IFskina6-2010	0.413196	-2.42016	SGa6-2011 down vs IFskina6-2011
21480	10484716	NM_146641 // Olfr1164 // olfactory receptor 1164 // 2 E1|2 // 258634 /// ENSMUST0000009	Olfr1164	NM_146641	0.384891	-2.59814	SGa62010 down vs IFskina6-2010	0.438687	-2.27953	SGa6-2011 down vs IFskina6-2011
33781	10595787	NM_019864 // Atr // ataxia telangiectasia and Rad3 related // 9 E4|9 // 245000 /// ENSM	Atr	NM_019864	0.392383	-2.54853	SGa62010 down vs IFskina6-2010	0.484444	-2.06422	SGa6-2011 down vs IFskina6-2011
29706	10560131	NM_175250 // 2810007J24Rik // RIKEN cDNA 2810007J24 gene // 7 A1|7 // 76971 /// EU48616	2810007J24Rik	NM_175250	0.393361	-2.54219	SGa62010 down vs IFskina6-2010	0.366446	-2.72891	SGa6-2011 down vs IFskina6-2011
12749	10403945	NM_178210 // Hist1h4j // histone cluster 1, H4j // 13 A2-A3|13 // 319159 /// BC139425 /	Hist1h4j	NM_178210	0.393752	-2.53967	SGa62010 down vs IFskina6-2010	0.318185	-3.14282	SGa6-2011 down vs IFskina6-2011				ECM
34146	10598796	NM_028568 // Dusp21 // dual specificity phosphatase 21 // X A1.2|X // 73547 /// BC04860	Dusp21	NM_028568	0.39381	-2.53929	SGa62010 down vs IFskina6-2010	0.44403	-2.2521	SGa6-2011 down vs IFskina6-2011
27976	10545252	ENSMUST00000103403 // Igk-V21-2 // immunoglobulin kappa chain variable 21 (V21)-2 // 6	Igk-V21-2	ENSMUST00000103403	0.393998	-2.53808	SGa62010 down vs IFskina6-2010	0.469752	-2.12878	SGa6-2011 down vs IFskina6-2011
15921	10432176	NR_034051 // Snora34 // small nucleolar RNA, H/ACA box 34 // 15|15 // 100217417	Snora34	NR_034051	0.394835	-2.53271	SGa62010 down vs IFskina6-2010	0.49257	-2.03017	SGa6-2011 down vs IFskina6-2011
26507	10532019	NM_001039647 // Gbp11 // guanylate binding protein 11 // 5 E5|5 // 634650 /// NM_194336	Gbp11	NM_001039647	0.395461	-2.52869	SGa62010 down vs IFskina6-2010	0.477759	-2.09311	SGa6-2011 down vs IFskina6-2011
14261	10416112	NM_175498 // Pnma2 // paraneoplastic antigen MA2 // 14 D1|14 // 239157 /// ENSMUST00000	Pnma2	NM_175498	0.395479	-2.52858	SGa62010 down vs IFskina6-2010	0.429203	-2.3299	SGa6-2011 down vs IFskina6-2011				Cell Adhesion
6798	10346141	ENSMUST00000056879 // C230029F24Rik // RIKEN cDNA C230029F24 gene // 1 C1.1|1 // 442837	C230029F24Rik	ENSMUST00000056879	0.396352	-2.52301	SGa62010 down vs IFskina6-2010	0.421786	-2.37087	SGa6-2011 down vs IFskina6-2011
9931	10376392	NM_207153 // Olfr325 // olfactory receptor 325 // 11 B1.3|11 // 258261 /// ENSMUST00000	Olfr325	NM_207153	0.396854	-2.51982	SGa62010 down vs IFskina6-2010	0.349327	-2.86265	SGa6-2011 down vs IFskina6-2011
12829	10404356	XM_909282 // Gm11362 // predicted gene 11362 // 13 A3.1|13 // 626683	Gm11362	XM_909282	0.39717	-2.51781	SGa62010 down vs IFskina6-2010	0.296408	-3.37373	SGa6-2011 down vs IFskina6-2011				Cell Adhesion/receptor
26168	10528788	ENSMUST00000072180 // Gm10062 // predicted gene 10062 // --- // 100038373	Gm10062	ENSMUST00000072180	0.397635	-2.51487	SGa62010 down vs IFskina6-2010	0.365999	-2.73225	SGa6-2011 down vs IFskina6-2011				Cell Adhesion
28478	10549871	NM_146916 // Olfr1346 // olfactory receptor 1346 // 7 A1|7 // 258918 /// ENSMUST0000005	Olfr1346	NM_146916	0.397867	-2.5134	SGa62010 down vs IFskina6-2010	0.491295	-2.03544	SGa6-2011 down vs IFskina6-2011
27168	10538519	NM_011153 // Gsbs // G substrate // 6 C1|6 23.22 cM // 19051 /// ENSMUST00000052827 //	Gsbs	NM_011153	0.398204	-2.51128	SGa62010 down vs IFskina6-2010	0.391623	-2.55348	SGa6-2011 down vs IFskina6-2011
21517	10484801	NM_146967 // Olfr1226 // olfactory receptor 1226 // 2 E1|2 // 258969 /// ENSMUST0000009	Olfr1226	NM_146967	0.398355	-2.51032	SGa62010 down vs IFskina6-2010	0.338135	-2.9574	SGa6-2011 down vs IFskina6-2011
9691	10374327	NM_028669 // 4930415F15Rik // RIKEN cDNA 4930415F15 gene // 11|11 // 73862	4930415F15Rik	NM_028669	0.39932	-2.50426	SGa62010 down vs IFskina6-2010	0.293584	-3.40618	SGa6-2011 down vs IFskina6-2011
17035	10442283	ENSMUST00000055305 // Gm9805 // predicted gene 9805 // 17 A3.3|17 // 194612 /// AB01033	Gm9805	ENSMUST00000055305	0.400072	-2.49955	SGa62010 down vs IFskina6-2010	0.473845	-2.11039	SGa6-2011 down vs IFskina6-2011
12795	10404063	NM_175660 // Hist1h2ab // histone cluster 1, H2ab // 13 A2-A3|13 // 319172 /// BC117110	Hist1h2ab	NM_175660	0.400699	-2.49564	SGa62010 down vs IFskina6-2010	0.131951	-7.57857	SGa6-2011 down vs IFskina6-2011
12499	10401698	NM_145836 // 6430527G18Rik // RIKEN cDNA 6430527G18 gene // 12 D2|12 // 238330 /// ENSM	6430527G18Rik	NM_145836	0.400807	-2.49497	SGa62010 down vs IFskina6-2010	0.444624	-2.24909	SGa6-2011 down vs IFskina6-2011
8697	10364529	NM_011178 // Prtn3 // proteinase 3 // 10 C1|10 43.0 cM // 19152 /// ENSMUST00000006679	Prtn3	NM_011178	0.400957	-2.49403	SGa62010 down vs IFskina6-2010	0.377438	-2.64944	SGa6-2011 down vs IFskina6-2011
20966	10479377	NR_029901 // Mir133a-2 // microRNA 133a-2 // 2|2 // 723954	Mir133a-2	NR_029901	0.400967	-2.49397	SGa62010 down vs IFskina6-2010	0.140808	-7.10186	SGa6-2011 down vs IFskina6-2011
16364	10436602	NR_029728 // Mirlet7c-1 // microRNA let7c-1 // 16|16 // 387246	Mirlet7c-1	NR_029728	0.401071	-2.49333	SGa62010 down vs IFskina6-2010	0.403278	-2.47968	SGa6-2011 down vs IFskina6-2011
11998	10397507	NM_010363 // Gstz1 // glutathione transferase zeta 1 (maleylacetoacetate isomerase) //	Gstz1	NM_010363	0.40218	-2.48645	SGa62010 down vs IFskina6-2010	0.316126	-3.16329	SGa6-2011 down vs IFskina6-2011
11624	10393749	NR_030682 // 2810410L24Rik // RIKEN cDNA 2810410L24 gene // 11 E2|11 // 100042332	2810410L24Rik	NR_030682	0.402801	-2.48262	SGa62010 down vs IFskina6-2010	0.456897	-2.18868	SGa6-2011 down vs IFskina6-2011
26305	10530128	NM_177006 // 3110047P20Rik // RIKEN cDNA 3110047P20 gene // 5|5 C3.3 // 319807 /// ENSM	3110047P20Rik	NM_177006	0.402818	-2.48251	SGa62010 down vs IFskina6-2010	0.425992	-2.34746	SGa6-2011 down vs IFskina6-2011
28655	10550994	NM_007675 // Ceacam10 // carcinoembryonic antigen-related cell adhesion molecule 10 //	Ceacam10	NM_007675	0.403236	-2.47994	SGa62010 down vs IFskina6-2010	0.414599	-2.41197	SGa6-2011 down vs IFskina6-2011
10112	10378403	NM_001126489 // Zfp735 // zinc finger protein 735 // 11 B4|11 // 76390 /// BC137974 //	Zfp735	NM_001126489	0.40415	-2.47433	SGa62010 down vs IFskina6-2010	0.495942	-2.01636	SGa6-2011 down vs IFskina6-2011
34091	10598491	ENSMUST00000086274 // Gm10490 // predicted gene 10490 // --- // 100038473	Gm10490	ENSMUST00000086274	0.405424	-2.46655	SGa62010 down vs IFskina6-2010	0.452006	-2.21236	SGa6-2011 down vs IFskina6-2011				Apoptosis
17564	10447517	NR_003519 // Pisd-ps2 // phosphatidylserine decarboxylase, pseudogene 2 // 17 A1|17 //	Pisd-ps2	NR_003519	0.405442	-2.46644	SGa62010 down vs IFskina6-2010	0.215746	-4.63508	SGa6-2011 down vs IFskina6-2011
14732	10420302	NM_010371 // Gzmc // granzyme C // 14 C3|14 20.5 cM // 14940 /// ENSMUST00000015585 //	Gzmc	NM_010371	0.405536	-2.46587	SGa62010 down vs IFskina6-2010	0.297747	-3.35856	SGa6-2011 down vs IFskina6-2011
30706	10567086	NM_177382 // Cyp2r1 // cytochrome P450, family 2, subfamily r, polypeptide 1 // 7 F1|7	Cyp2r1	NM_177382	0.405845	-2.46399	SGa62010 down vs IFskina6-2010	0.258743	-3.86484	SGa6-2011 down vs IFskina6-2011				Cell Junction
9455	10372106	ENSMUST00000105285 // Epyc // epiphycan // 10 C2-C3|10 55.0 cM // 13516 /// NR_033537 /	Epyc	ENSMUST00000105285	0.406478	-2.46016	SGa62010 down vs IFskina6-2010	0.154173	-6.48623	SGa6-2011 down vs IFskina6-2011
23638	10504294	NM_001037709 // Rusc2 // RUN and SH3 domain containing 2 // 4 A5|4 // 100213 /// NM_199	Rusc2	NM_001037709	0.407347	-2.45491	SGa62010 down vs IFskina6-2010	0.410118	-2.43832	SGa6-2011 down vs IFskina6-2011
17812	10449807	NM_001033163 // Ephx3 // epoxide hydrolase 3 // 17 B1|17 // 71932 /// ENSMUST0000008772	Ephx3	NM_001033163	0.408054	-2.45066	SGa62010 down vs IFskina6-2010	0.372624	-2.68367	SGa6-2011 down vs IFskina6-2011
31859	10577954	NM_001080813 // Rab11fip1 // RAB11 family interacting protein 1 (class I) // 8|8 A3 //	Rab11fip1	NM_001080813	0.409254	-2.44347	SGa62010 down vs IFskina6-2010	0.206008	-4.85418	SGa6-2011 down vs IFskina6-2011
23882	10506213	NM_001033773 // Ube2u // ubiquitin-conjugating enzyme E2U (putative) // 4 C6|4 // 38153	Ube2u	NM_001033773	0.410103	-2.43841	SGa62010 down vs IFskina6-2010	0.495562	-2.01791	SGa6-2011 down vs IFskina6-2011
22480	10493910	NM_001177694 // Gm4858 // predicted gene 4858 // 3 F1|3 // 229571 /// NM_001034860 // G	Gm4858	NM_001177694	0.410562	-2.43568	SGa62010 down vs IFskina6-2010	0.455183	-2.19692	SGa6-2011 down vs IFskina6-2011
27175	10538567	NM_134187 // Vmn1r8 // vomeronasal 1 receptor 8 // 6 B3|6 // 171205 /// ENSMUST00000078	Vmn1r8	NM_134187	0.410578	-2.43559	SGa62010 down vs IFskina6-2010	0.306068	-3.26724	SGa6-2011 down vs IFskina6-2011
21323	10483665	NM_001005343 // Sp9 // trans-acting transcription factor 9 // 2 C3|2 // 381373 /// BC13	Sp9	NM_001005343	0.41095	-2.43339	SGa62010 down vs IFskina6-2010	0.49158	-2.03426	SGa6-2011 down vs IFskina6-2011				Receptor
31185	10571252	NM_031374 // Tex15 // testis expressed gene 15 // 8 A4|8 // 104271 /// ENSMUST000000097	Tex15	NM_031374	0.411099	-2.4325	SGa62010 down vs IFskina6-2010	0.432504	-2.31212	SGa6-2011 down vs IFskina6-2011
35339	10607962	NM_011667 // Ube1y1 // ubiquitin-activating enzyme E1, Chr Y 1 // Y A1|Y // 22202 /// A	Ube1y1	NM_011667	0.41165	-2.42925	SGa62010 down vs IFskina6-2010	0.367698	-2.71962	SGa6-2011 down vs IFskina6-2011
22253	10491899	AK030119 // 4932443G14 // hypothetical protein 4932443G14 // 3 C|3 // 329633 /// XR_104	4932443G14	AK030119	0.412504	-2.42422	SGa62010 down vs IFskina6-2010	0.349337	-2.86257	SGa6-2011 down vs IFskina6-2011
16297	10435993	NM_198106 // Slc9a10 // solute carrier family 9, member 10 // 16 B5|16 // 208169 /// EN	Slc9a10	NM_198106	0.413868	-2.41623	SGa62010 down vs IFskina6-2010	0.381891	-2.61854	SGa6-2011 down vs IFskina6-2011
11684	10394389	ENSMUST00000037953 // 2810032G03Rik // RIKEN cDNA 2810032G03 gene // 12 A1.1|12 // 7266	2810032G03Rik	ENSMUST00000037953	0.415885	-2.40451	SGa62010 down vs IFskina6-2010	0.483109	-2.06993	SGa6-2011 down vs IFskina6-2011
21221	10482133	NM_146368 // Olfr361 // olfactory receptor 361 // 2 C1|2 // 258365 /// ENSMUST000001001	Olfr361	NM_146368	0.416305	-2.40208	SGa62010 down vs IFskina6-2010	0.450461	-2.21995	SGa6-2011 down vs IFskina6-2011
8678	10364419	NM_147042 // Olfr1353 // olfactory receptor 1353 // 10 C2|10 // 259044 /// ENSMUST00000	Olfr1353	NM_147042	0.416962	-2.3983	SGa62010 down vs IFskina6-2010	0.410876	-2.43383	SGa6-2011 down vs IFskina6-2011				Cell Adhesion
18739	10458755	NM_001163013 // Ythdc2 // YTH domain containing 2 // 18 B3|18 // 240255 /// BC138263 //	Ythdc2	NM_001163013	0.417134	-2.39731	SGa62010 down vs IFskina6-2010	0.34635	-2.88725	SGa6-2011 down vs IFskina6-2011
24038	10507833	NM_001085502 // Nt5c1a // 5'-nucleotidase, cytosolic IA // 4 D2.2|4 // 230718 /// BC147	Nt5c1a	NM_001085502	0.417358	-2.39602	SGa62010 down vs IFskina6-2010	0.438977	-2.27802	SGa6-2011 down vs IFskina6-2011
13514	10409840	NM_199148 // BC051665 // cDNA sequence BC051665 // 13 B2|13 // 218275 /// ENSMUST000000	BC051665	NM_199148	0.417569	-2.39482	SGa62010 down vs IFskina6-2010	0.422979	-2.36418	SGa6-2011 down vs IFskina6-2011
23351	10501802	NM_178936 // Tmem56 // transmembrane protein 56 // 3|3 G3 // 99887 /// ENSMUST000000297	Tmem56	NM_178936	0.417817	-2.39339	SGa62010 down vs IFskina6-2010	0.264244	-3.78438	SGa6-2011 down vs IFskina6-2011
22850	10497481	ENSMUST00000057404 // 2810416G20Rik // RIKEN cDNA 2810416G20 gene // 3 A3|3 // 10004035	2810416G20Rik	ENSMUST00000057404	0.41819	-2.39126	SGa62010 down vs IFskina6-2010	0.33486	-2.98633	SGa6-2011 down vs IFskina6-2011
29558	10559177	AK044960 // B130016D09Rik // RIKEN cDNA B130016D09 cDNA // 7 F5|7 // 436015	B130016D09Rik	AK044960	0.418357	-2.3903	SGa62010 down vs IFskina6-2010	0.443664	-2.25396	SGa6-2011 down vs IFskina6-2011
28564	10550402	NM_001007569 // Pnmal1 // PNMA-like 1 // 7 A2|7 // 71691 /// ENSMUST00000038163 // Pnma	Pnmal1	NM_001007569	0.418627	-2.38876	SGa62010 down vs IFskina6-2010	0.337734	-2.96091	SGa6-2011 down vs IFskina6-2011
12517	10401834	NR_003647 // Gm5039 // eukaryotic translation initiation factor 1A pseudogene // 12 D3|	Gm5039	NR_003647	0.418718	-2.38824	SGa62010 down vs IFskina6-2010	0.32809	-3.04794	SGa6-2011 down vs IFskina6-2011
9430	10371902	NR_029812 // Mir135a-2 // microRNA 135a-2 // 10|10 // 723955	Mir135a-2	NR_029812	0.419816	-2.382	SGa62010 down vs IFskina6-2010	0.398506	-2.50937	SGa6-2011 down vs IFskina6-2011
27792	10544108	NM_001033171 // Klrg2 // killer cell lectin-like receptor subfamily G, member 2 // 6 B1	Klrg2	NM_001033171	0.42002	-2.38084	SGa62010 down vs IFskina6-2010	0.364439	-2.74394	SGa6-2011 down vs IFskina6-2011
19717	10467989	NM_001033343 // Sec31b // Sec31 homolog B (S. cerevisiae) // 19 C3|19 // 240667 /// ENS	Sec31b	NM_001033343	0.421289	-2.37367	SGa62010 down vs IFskina6-2010	0.40457	-2.47176	SGa6-2011 down vs IFskina6-2011
28018	10545651	NM_023547 // Ino80b // INO80 complex subunit B // 6|6 D1 // 70020 /// ENSMUST0000011393	Ino80b	NM_023547	0.421453	-2.37274	SGa62010 down vs IFskina6-2010	0.476392	-2.09911	SGa6-2011 down vs IFskina6-2011
23649	10504419	BC147345 // 5430416O09Rik // RIKEN cDNA 5430416O09 gene // 4 B1|4 // 71406 /// NR_03335	5430416O09Rik	BC147345	0.422592	-2.36635	SGa62010 down vs IFskina6-2010	0.498403	-2.00641	SGa6-2011 down vs IFskina6-2011				Notch Signaling Pathway
21264	10482795	NM_029972 // Ermn // ermin, ERM-like protein // 2 C2|2 // 77767 /// ENSMUST00000090940	Ermn	NM_029972	0.422756	-2.36543	SGa62010 down vs IFskina6-2010	0.494409	-2.02262	SGa6-2011 down vs IFskina6-2011
23353	10501827	NR_036456 // A730020M07Rik // RIKEN cDNA A730020M07 gene // 3 G1|3 // 319738 /// NR_036	A730020M07Rik	NR_036456	0.423446	-2.36158	SGa62010 down vs IFskina6-2010	0.466029	-2.14579	SGa6-2011 down vs IFskina6-2011
14725	10420254	NM_008572 // Mcpt8 // mast cell protease 8 // 14 C3|14 20.0 cM // 17231 /// ENSMUST0000	Mcpt8	NM_008572	0.424618	-2.35506	SGa62010 down vs IFskina6-2010	0.471891	-2.11913	SGa6-2011 down vs IFskina6-2011
13336	10408359	NM_009513 // Nrsn1 // neurensin 1 // 13 A3.1|13 // 22360 /// ENSMUST00000057866 // Nrsn	Nrsn1	NM_009513	0.425154	-2.35209	SGa62010 down vs IFskina6-2010	0.47762	-2.09371	SGa6-2011 down vs IFskina6-2011
13520	10409881	NM_009411 // Tpbpa // trophoblast specific protein alpha // 13 B2|13 36.0 cM // 21984 /	Tpbpa	NM_009411	0.42634	-2.34555	SGa62010 down vs IFskina6-2010	0.499205	-2.00318	SGa6-2011 down vs IFskina6-2011
26393	10531041	NM_152811 // Ugt2b1 // UDP glucuronosyltransferase 2 family, polypeptide B1 // 5 E1|5 /	Ugt2b1	NM_152811	0.427333	-2.34009	SGa62010 down vs IFskina6-2010	0.355892	-2.80984	SGa6-2011 down vs IFskina6-2011
8201	10360145	AK047216 // B930036N10Rik // RIKEN cDNA B930036N10 gene // 1 H3|1 // 100048917 /// AK17	B930036N10Rik	AK047216	0.42757	-2.3388	SGa62010 down vs IFskina6-2010	0.187925	-5.32126	SGa6-2011 down vs IFskina6-2011
20437	10474361	NM_029837 // Mpped2 // metallophosphoesterase domain containing 2 // 2 E3|2 59.0 cM //	Mpped2	NM_029837	0.427716	-2.338	SGa62010 down vs IFskina6-2010	0.443951	-2.2525	SGa6-2011 down vs IFskina6-2011
19343	10464287	NM_029372 // 1700011F14Rik // RIKEN cDNA 1700011F14 gene // 19|19 D3 // 75645 /// ENSMU	1700011F14Rik	NM_029372	0.427889	-2.33705	SGa62010 down vs IFskina6-2010	0.450565	-2.21943	SGa6-2011 down vs IFskina6-2011
22471	10493886	NM_011477 // Sprr2k // small proline-rich protein 2K // 3 F1|3 45.2 cM // 20765 /// ENS	Sprr2k	NM_011477	0.428047	-2.33619	SGa62010 down vs IFskina6-2010	0.269392	-3.71206	SGa6-2011 down vs IFskina6-2011
24421	10511779	NM_175406 // Atp6v0d2 // ATPase, H+ transporting, lysosomal V0 subunit D2 // 4 A3|4 //	Atp6v0d2	NM_175406	0.428838	-2.33188	SGa62010 down vs IFskina6-2010	0.403514	-2.47823	SGa6-2011 down vs IFskina6-2011				ECM
28650	10550967	NM_001102613 // Phldb3 // pleckstrin homology-like domain, family B, member 3 // 7 A3|7	Phldb3	NM_001102613	0.42918	-2.33002	SGa62010 down vs IFskina6-2010	0.475424	-2.10338	SGa6-2011 down vs IFskina6-2011
12318	10399965	NR_015602 // F730043M19Rik // RIKEN cDNA F730043M19 gene // 12|12 // 320046	F730043M19Rik	NR_015602	0.429379	-2.32894	SGa62010 down vs IFskina6-2010	0.463154	-2.15911	SGa6-2011 down vs IFskina6-2011
28622	10550790	NM_001004194 // Nlrp4e // NLR family, pyrin domain containing 4E // 7 A3|7 // 446099 //	Nlrp4e	NM_001004194	0.429703	-2.32719	SGa62010 down vs IFskina6-2010	0.419007	-2.38659	SGa6-2011 down vs IFskina6-2011
24885	10515808	NM_026789 // Wdr65 // WD repeat domain 65 // 4 D2.1|4 // 68625 /// ENSMUST00000071972 /	Wdr65	NM_026789	0.430532	-2.32271	SGa62010 down vs IFskina6-2010	0.41432	-2.41359	SGa6-2011 down vs IFskina6-2011
20104	10471844	NM_021606 // Nek6 // NIMA (never in mitosis gene a)-related expressed kinase 6 // 2 B|2	Nek6	NM_021606	0.43115	-2.31938	SGa62010 down vs IFskina6-2010	0.380519	-2.62799	SGa6-2011 down vs IFskina6-2011
22733	10496457	ENSMUST00000090166 // Adh6b // alcohol dehydrogenase 6B (class V) // 3 G3|3 // 229871	Adh6b	ENSMUST00000090166	0.431199	-2.31912	SGa62010 down vs IFskina6-2010	0.49893	-2.00429	SGa6-2011 down vs IFskina6-2011
27223	10538875	ENSMUST00000103308 // AY498738 // cDNA sequence AY498738 // 6 C1|6 // 692182	AY498738	ENSMUST00000103308	0.431491	-2.31755	SGa62010 down vs IFskina6-2010	0.455047	-2.19758	SGa6-2011 down vs IFskina6-2011
12009	10397555	XM_990056 // Gm8587 // predicted pseudogene 8587 // 12 D3|12 // 667350	Gm8587	XM_990056	0.432343	-2.31298	SGa62010 down vs IFskina6-2010	0.437986	-2.28318	SGa6-2011 down vs IFskina6-2011
22181	10491252	NM_029489 // Samd7 // sterile alpha motif domain containing 7 // 3 A3|3 // 75953 /// NR	Samd7	NM_029489	0.432627	-2.31146	SGa62010 down vs IFskina6-2010	0.380045	-2.63127	SGa6-2011 down vs IFskina6-2011
22053	10490164	ENSMUST00000029022 // Ankrd60 // ankyrin repeat domain 60 // 2 H4|2 // 70065	Ankrd60	ENSMUST00000029022	0.432669	-2.31124	SGa62010 down vs IFskina6-2010	0.397562	-2.51533	SGa6-2011 down vs IFskina6-2011
31956	10578743	NM_175939 // Adam29 // a disintegrin and metallopeptidase domain 29 // 8 B2|8 // 244486	Adam29	NM_175939	0.432722	-2.31095	SGa62010 down vs IFskina6-2010	0.377958	-2.6458	SGa6-2011 down vs IFskina6-2011				ECM
21149	10481378	NR_029838 // Mir219-2 // microRNA 219-2 // 2|2 // 723904	Mir219-2	NR_029838	0.433978	-2.30426	SGa62010 down vs IFskina6-2010	0.39739	-2.51642	SGa6-2011 down vs IFskina6-2011
12372	10400474	NM_009385 // Nkx2-1 // NK2 homeobox 1 // 12 C1-C3|12 28.0 cM // 21869 /// NM_001146198	Nkx2-1	NM_009385	0.43479	-2.29996	SGa62010 down vs IFskina6-2010	0.455374	-2.196	SGa6-2011 down vs IFskina6-2011				Cytoskeleton
23268	10501007	AB081756 // Bclp2 // chitinase like protein 2 // 3 F2.2|3 // 229687 /// BC116403 // Bcl	Bclp2	AB081756	0.435052	-2.29858	SGa62010 down vs IFskina6-2010	0.378609	-2.64125	SGa6-2011 down vs IFskina6-2011
12374	10400483	NM_172577 // Slc25a21 // solute carrier family 25 (mitochondrial oxodicarboxylate carri	Slc25a21	NM_172577	0.436113	-2.29299	SGa62010 down vs IFskina6-2010	0.469098	-2.13175	SGa6-2011 down vs IFskina6-2011
23076	10499429	ENSMUST00000090946 // Gm10253 // predicted gene 10253 // --- // 791281	Gm10253	ENSMUST00000090946	0.436178	-2.29264	SGa62010 down vs IFskina6-2010	0.475129	-2.10469	SGa6-2011 down vs IFskina6-2011
28047	10545881	NM_053096 // Cml2 // camello-like 2 // 6 C3|6 // 93673 /// ENSMUST00000045008 // Cml2 /	Cml2	NM_053096	0.436609	-2.29038	SGa62010 down vs IFskina6-2010	0.473497	-2.11194	SGa6-2011 down vs IFskina6-2011
29857	10561204	NM_181593 // Itpkc // inositol 1,4,5-trisphosphate 3-kinase C // 7 A3|7 // 233011 /// E	Itpkc	NM_181593	0.437597	-2.28521	SGa62010 down vs IFskina6-2010	0.365738	-2.7342	SGa6-2011 down vs IFskina6-2011
10036	10377490	NM_009659 // Alox12b // arachidonate 12-lipoxygenase, 12R type // 11 B3|11 37.0 cM // 1	Alox12b	NM_009659	0.43772	-2.28457	SGa62010 down vs IFskina6-2010	0.168821	-5.92342	SGa6-2011 down vs IFskina6-2011
15411	10427272	NM_010463 // Hoxc12 // homeobox C12 // 15 F3|15 57.4 cM // 15421 /// ENSMUST00000055562	Hoxc12	NM_010463	0.438016	-2.28302	SGa62010 down vs IFskina6-2010	0.421015	-2.37521	SGa6-2011 down vs IFskina6-2011
20309	10473511	NM_207154 // Olfr1102 // olfactory receptor 1102 // 2 D|2 // 228228 /// ENSMUST00000055	Olfr1102	NM_207154	0.43815	-2.28232	SGa62010 down vs IFskina6-2010	0.318475	-3.13996	SGa6-2011 down vs IFskina6-2011
35169	10606589	ENSMUST00000052500 // 4930412D23Rik // RIKEN cDNA 4930412D23 gene // X E3|X // 73934	4930412D23Rik	ENSMUST00000052500	0.440875	-2.26822	SGa62010 down vs IFskina6-2010	0.235415	-4.24781	SGa6-2011 down vs IFskina6-2011				ECM
12279	10399655	ENSMUST00000105166 // Gm4425 // predicted gene 4425 // 12 A1.3|12 // 100043416 /// ENSM	Gm4425	ENSMUST00000105166	0.441081	-2.26716	SGa62010 down vs IFskina6-2010	0.476927	-2.09676	SGa6-2011 down vs IFskina6-2011				Ubl Conj Path
22256	10491920	AF256218 // Elf2 // E74-like factor 2 // 3 C|3 // 69257	Elf2	AF256218	0.441597	-2.26451	SGa62010 down vs IFskina6-2010	0.363261	-2.75284	SGa6-2011 down vs IFskina6-2011				Ubl Conj Path
22336	10492640	NM_178673 // Fstl5 // follistatin-like 5 // 3 E3|3 // 213262 /// ENSMUST00000038364 //	Fstl5	NM_178673	0.441841	-2.26326	SGa62010 down vs IFskina6-2010	0.354864	-2.81798	SGa6-2011 down vs IFskina6-2011				Apoptosis
17004	10442141	NM_134194 // Vmn1r225 // vomeronasal 1 receptor 225 // 17 A3.2|17 // 171228 /// ENSMUST	Vmn1r225	NM_134194	0.441841	-2.26326	SGa62010 down vs IFskina6-2010	0.308327	-3.24331	SGa6-2011 down vs IFskina6-2011
24736	10514500	NM_001004141 // Cyp2j11-ps // cytochrome P450, family 2, subfamily j, polypeptide 11, p	Cyp2j11-ps	NM_001004141	0.444003	-2.25223	SGa62010 down vs IFskina6-2010	0.350221	-2.85534	SGa6-2011 down vs IFskina6-2011
14801	10420935	NM_007940 // Ephx2 // epoxide hydrolase 2, cytoplasmic // 14 D|14 32.5 cM // 13850 ///	Ephx2	NM_007940	0.44541	-2.24512	SGa62010 down vs IFskina6-2010	0.374534	-2.66998	SGa6-2011 down vs IFskina6-2011
25621	10523095	NM_145146 // Afm // afamin // 5 E1|5 // 280662 /// ENSMUST00000113179 // Afm // afamin	Afm	NM_145146	0.445656	-2.24388	SGa62010 down vs IFskina6-2010	0.478791	-2.08859	SGa6-2011 down vs IFskina6-2011				ECM
27054	10537506	NM_146383 // Olfr460 // olfactory receptor 460 // 6 B2|6 // 258381 /// ENSMUST000000515	Olfr460	NM_146383	0.44574	-2.24346	SGa62010 down vs IFskina6-2010	0.492667	-2.02977	SGa6-2011 down vs IFskina6-2011				ECM/Cell Adhesion
6882	10347210	ENSMUST00000097699 // Gm15456 // predicted gene 15456 // 1 C3|1 // 100042814	Gm15456	ENSMUST00000097699	0.445905	-2.24263	SGa62010 down vs IFskina6-2010	0.412519	-2.42413	SGa6-2011 down vs IFskina6-2011
18818	10459475	NM_145493 // Cplx4 // complexin 4 // 18 E1|18 // 225644 /// ENSMUST00000025397 // Cplx4	Cplx4	NM_145493	0.446091	-2.24169	SGa62010 down vs IFskina6-2010	0.308708	-3.23931	SGa6-2011 down vs IFskina6-2011
11305	10390209	NM_009951 // Igf2bp1 // insulin-like growth factor 2 mRNA binding protein 1 // 11 D|11	Igf2bp1	NM_009951	0.446229	-2.241	SGa62010 down vs IFskina6-2010	0.260644	-3.83665	SGa6-2011 down vs IFskina6-2011
27442	10540993	NM_138311 // H1foo // H1 histone family, member O, oocyte-specific // 6 E3|6 // 171506	H1foo	NM_138311	0.446249	-2.2409	SGa62010 down vs IFskina6-2010	0.389037	-2.57045	SGa6-2011 down vs IFskina6-2011
28574	10550465	NM_023289 // Ceacam11 // carcinoembryonic antigen-related cell adhesion molecule 11 //	Ceacam11	NM_023289	0.446302	-2.24063	SGa62010 down vs IFskina6-2010	0.318475	-3.13996	SGa6-2011 down vs IFskina6-2011
19317	10463945	NM_001085390 // Dusp5 // dual specificity phosphatase 5 // 19 D2|19 // 240672	Dusp5	NM_001085390	0.446607	-2.23911	SGa62010 down vs IFskina6-2010	0.413464	-2.41859	SGa6-2011 down vs IFskina6-2011
14398	10417208	NM_028651 // Tmtc4 // transmembrane and tetratricopeptide repeat containing 4 // 14 E5|	Tmtc4	NM_028651	0.446972	-2.23728	SGa62010 down vs IFskina6-2010	0.45723	-2.18708	SGa6-2011 down vs IFskina6-2011
32050	10579636	NM_024444 // Cyp4f18 // cytochrome P450, family 4, subfamily f, polypeptide 18 // 8|8 C	Cyp4f18	NM_024444	0.44722	-2.23603	SGa62010 down vs IFskina6-2010	0.245748	-4.0692	SGa6-2011 down vs IFskina6-2011
17055	10442393	NM_010947 // Ntn3 // netrin 3 // 17 A3.3|17 // 18209 /// ENSMUST00000024931 // Ntn3 //	Ntn3	NM_010947	0.447595	-2.23416	SGa62010 down vs IFskina6-2010	0.3521	-2.8401	SGa6-2011 down vs IFskina6-2011
13203	10407454	ENSMUST00000069071 // Gm9973 // predicted gene 9973 // --- // 791366	Gm9973	ENSMUST00000069071	0.447821	-2.23304	SGa62010 down vs IFskina6-2010	0.311744	-3.20776	SGa6-2011 down vs IFskina6-2011
12365	10400393	BC049669 // Fam177a // family with sequence similarity 177, member A // 12 C1|12 // 733	Fam177a	BC049669	0.447986	-2.23221	SGa62010 down vs IFskina6-2010	0.312284	-3.20221	SGa6-2011 down vs IFskina6-2011
21303	10483379	AK156311 // F830016D02Rik // RIKEN cDNA F830016D02 gene // --- // 100038632 /// XM_0030	F830016D02Rik	AK156311	0.448341	-2.23044	SGa62010 down vs IFskina6-2010	0.398506	-2.50937	SGa6-2011 down vs IFskina6-2011
29740	10560385	NM_020261 // Psg23 // pregnancy-specific glycoprotein 23 // 7 A3|7 4.0 cM // 56868 ///	Psg23	NM_020261	0.448459	-2.22986	SGa62010 down vs IFskina6-2010	0.360162	-2.77653	SGa6-2011 down vs IFskina6-2011
34675	10603059	NM_020626 // Tmem27 // transmembrane protein 27 // X F5|X // 57394 /// ENSMUST000001122	Tmem27	NM_020626	0.448548	-2.22942	SGa62010 down vs IFskina6-2010	0.413463	-2.4186	SGa6-2011 down vs IFskina6-2011
12423	10400904	NM_028687 // 4930403N07Rik // RIKEN cDNA 4930403N07 gene // 12 C3|12 // 73936 /// ENSMU	4930403N07Rik	NM_028687	0.449848	-2.22297	SGa62010 down vs IFskina6-2010	0.455035	-2.19763	SGa6-2011 down vs IFskina6-2011
15594	10428714	NM_172378 // BC026439 // cDNA sequence BC026439 // 15 D1|15 // 210463 /// BC026439 // B	BC026439	NM_172378	0.450032	-2.22206	SGa62010 down vs IFskina6-2010	0.373523	-2.67721	SGa6-2011 down vs IFskina6-2011				Gap Junction
9684	10374228	NM_001037928 // Gm11992 // predicted gene 11992 // 11 A1|11 // 626870 /// ENSMUST000000	Gm11992	NM_001037928	0.45043	-2.2201	SGa62010 down vs IFskina6-2010	0.418826	-2.38763	SGa6-2011 down vs IFskina6-2011
7455	10352928	NM_011283 // Rp1 // retinitis pigmentosa 1 (human) // 1 A1|1 6.5 cM // 19888 /// NM_001	Rp1	NM_011283	0.450966	-2.21746	SGa62010 down vs IFskina6-2010	0.452809	-2.20844	SGa6-2011 down vs IFskina6-2011
29421	10557575	NM_016754 // Mylpf // myosin light chain, phosphorylatable, fast skeletal muscle // 7 F	Mylpf	NM_016754	0.450992	-2.21734	SGa62010 down vs IFskina6-2010	0.485151	-2.06121	SGa6-2011 down vs IFskina6-2011
27974	10545247	U59155 // Igk-V19-14 // immunoglobulin kappa chain variable 19 (V19)-14 // 6 C1|6 // 66	Igk-V19-14	U59155	0.451062	-2.21699	SGa62010 down vs IFskina6-2010	0.267826	-3.73376	SGa6-2011 down vs IFskina6-2011
12997	10405838	NM_030047 // 4930458L03Rik // RIKEN cDNA 4930458L03 gene // 13 B3|13 // 78124 /// ENSMU	4930458L03Rik	NM_030047	0.451754	-2.2136	SGa62010 down vs IFskina6-2010	0.403278	-2.47968	SGa6-2011 down vs IFskina6-2011
31649	10575873	NM_027950 // Osgin1 // oxidative stress induced growth inhibitor 1 // 8 E1|8 // 71839 /	Osgin1	NM_027950	0.452145	-2.21168	SGa62010 down vs IFskina6-2010	0.40419	-2.47408	SGa6-2011 down vs IFskina6-2011
33122	10589535	NM_008694 // Ngp // neutrophilic granule protein // 9 F2|9 // 18054 /// ENSMUST00000035	Ngp	NM_008694	0.45278	-2.20858	SGa62010 down vs IFskina6-2010	0.280091	-3.57027	SGa6-2011 down vs IFskina6-2011
16716	10439848	ENSMUST00000074055 // Gm4827 // predicted gene 4827 // 16 B5|16 // 224180	Gm4827	ENSMUST00000074055	0.452918	-2.20791	SGa62010 down vs IFskina6-2010	0.308802	-3.23832	SGa6-2011 down vs IFskina6-2011
9410	10371603	AK132809 // Gm6653 // predicted gene 6653 // 10 C1|10 // 626115 /// XR_035409 // Gm6653	Gm6653	AK132809	0.45332	-2.20595	SGa62010 down vs IFskina6-2010	0.461702	-2.1659	SGa6-2011 down vs IFskina6-2011
29139	10555262	NM_001164258 // Xrra1 // X-ray radiation resistance associated 1 // 7 E1|7 // 446101 //	Xrra1	NM_001164258	0.453629	-2.20444	SGa62010 down vs IFskina6-2010	0.4063	-2.46124	SGa6-2011 down vs IFskina6-2011
32926	10587241	NM_173731 // Hmgcll1 // 3-hydroxymethyl-3-methylglutaryl-Coenzyme A lyase-like 1 // 9 D	Hmgcll1	NM_173731	0.454126	-2.20203	SGa62010 down vs IFskina6-2010	0.41061	-2.4354	SGa6-2011 down vs IFskina6-2011
35311	10607712	NM_008177 // Grpr // gastrin releasing peptide receptor // X F5|X 70.0 cM // 14829 ///	Grpr	NM_008177	0.454285	-2.20126	SGa62010 down vs IFskina6-2010	0.479166	-2.08696	SGa6-2011 down vs IFskina6-2011
15852	10431220	NM_001164625 // 2210021J22Rik // RIKEN cDNA 2210021J22 gene // 15 E2|15 // 72355 /// NM	2210021J22Rik	NM_001164625	0.454557	-2.19995	SGa62010 down vs IFskina6-2010	0.413247	-2.41986	SGa6-2011 down vs IFskina6-2011
15892	10431839	NM_207533 // Dbx2 // developing brain homeobox 2 // 15 F1|15 71.1 cM // 223843 /// ENSM	Dbx2	NM_207533	0.455043	-2.1976	SGa62010 down vs IFskina6-2010	0.491243	-2.03565	SGa6-2011 down vs IFskina6-2011
33934	10597309	NM_016853 // Stac // src homology three (SH3) and cysteine rich domain // 9 F3|9 62.0 c	Stac	NM_016853	0.455577	-2.19502	SGa62010 down vs IFskina6-2010	0.437458	-2.28594	SGa6-2011 down vs IFskina6-2011
21931	10489038	NM_020255 // Scand1 // SCAN domain-containing 1 // 2|2 H2 // 19018 /// ENSMUST000000791	Scand1	NM_020255	0.456315	-2.19147	SGa62010 down vs IFskina6-2010	0.392954	-2.54482	SGa6-2011 down vs IFskina6-2011
29114	10555039	NM_001039039 // Kctd21 // potassium channel tetramerisation domain containing 21 // 7 E	Kctd21	NM_001039039	0.456483	-2.19066	SGa62010 down vs IFskina6-2010	0.385168	-2.59627	SGa6-2011 down vs IFskina6-2011
20771	10477551	DQ080431 // 1700003F12Rik // RIKEN cDNA 1700003F12 gene // 2 H1|2 // 75480 /// BC147532	1700003F12Rik	DQ080431	0.457503	-2.18578	SGa62010 down vs IFskina6-2010	0.47012	-2.12712	SGa6-2011 down vs IFskina6-2011
26964	10536563	NM_021050 // Cftr // cystic fibrosis transmembrane conductance regulator homolog // 6 A	Cftr	NM_021050	0.457555	-2.18553	SGa62010 down vs IFskina6-2010	0.458119	-2.18284	SGa6-2011 down vs IFskina6-2011
29818	10560862	BC139039 // 2310033E01Rik // RIKEN cDNA 2310033E01 gene // 7 A2-A3|7 // 641361 /// NM_0	2310033E01Rik	BC139039	0.457669	-2.18499	SGa62010 down vs IFskina6-2010	0.476529	-2.09851	SGa6-2011 down vs IFskina6-2011
22682	10495933	NM_197997 // 4930422G04Rik // RIKEN cDNA 4930422G04 gene // 3 G2|3 // 71643 /// ENSMUST	4930422G04Rik	NM_197997	0.457713	-2.18478	SGa62010 down vs IFskina6-2010	0.425406	-2.35069	SGa6-2011 down vs IFskina6-2011
14035	10414551	NM_019398 // Ear5 // eosinophil-associated, ribonuclease A family, member 5 // 14 C1|14	Ear5	NM_019398	0.459487	-2.17634	SGa62010 down vs IFskina6-2010	0.471708	-2.11996	SGa6-2011 down vs IFskina6-2011
24941	10516241	NM_001007573 // Maneal // mannosidase, endo-alpha-like // 4 D2.2|4 // 215090 /// ENSMUS	Maneal	NM_001007573	0.460715	-2.17054	SGa62010 down vs IFskina6-2010	0.481978	-2.07478	SGa6-2011 down vs IFskina6-2011
17986	10451142	NM_001177468 // Gm7325 // predicted gene 7325 // 17 B3|17 // 653016 /// NM_001177469 //	Gm7325	NM_001177468	0.460988	-2.16926	SGa62010 down vs IFskina6-2010	0.426684	-2.34366	SGa6-2011 down vs IFskina6-2011
32599	10584378	NM_146481 // Olfr890 // olfactory receptor 890 // 9 A5|9 // 258474 /// ENSMUST000000798	Olfr890	NM_146481	0.461057	-2.16893	SGa62010 down vs IFskina6-2010	0.37425	-2.67201	SGa6-2011 down vs IFskina6-2011
30699	10567034	NM_020623 // Pth // parathyroid hormone // 7 F|7 52.5 cM // 19226 /// ENSMUST0000007979	Pth	NM_020623	0.461861	-2.16515	SGa62010 down vs IFskina6-2010	0.264517	-3.78047	SGa6-2011 down vs IFskina6-2011
29231	10555883	NM_147050 // Olfr659 // olfactory receptor 659 // 7 E3|7 // 259052 /// ENSMUST000000981	Olfr659	NM_147050	0.462918	-2.16021	SGa62010 down vs IFskina6-2010	0.484283	-2.06491	SGa6-2011 down vs IFskina6-2011
16756	10440141	NM_146996 // Olfr177 // olfactory receptor 177 // 16 C2|16 // 258998 /// NM_146993 // O	Olfr177	NM_146996	0.463569	-2.15718	SGa62010 down vs IFskina6-2010	0.418439	-2.38983	SGa6-2011 down vs IFskina6-2011
20064	10471597	XM_887818 // Gm6422 // predicted gene 6422 // 2 B|2 // 623370	Gm6422	XM_887818	0.463808	-2.15606	SGa62010 down vs IFskina6-2010	0.498515	-2.00596	SGa6-2011 down vs IFskina6-2011
31322	10572456	NM_010592 // Jund // Jun proto-oncogene related gene d // 8 C2|8 33.0 cM // 16478 /// E	Jund	NM_010592	0.463957	-2.15537	SGa62010 down vs IFskina6-2010	0.396473	-2.52224	SGa6-2011 down vs IFskina6-2011
30579	10566326	NM_023835 // Trim12a // tripartite motif-containing 12A // 7 E3|7 // 76681 /// BC094899	Trim12a	NM_023835	0.464112	-2.15465	SGa62010 down vs IFskina6-2010	0.121995	-8.19705	SGa6-2011 down vs IFskina6-2011
35095	10606083	NM_007709 // Cited1 // Cbp/p300-interacting transactivator with Glu/Asp-rich carboxy-te	Cited1	NM_007709	0.464191	-2.15428	SGa62010 down vs IFskina6-2010	0.475037	-2.1051	SGa6-2011 down vs IFskina6-2011
12881	10404836	NM_183204 // Rnf182 // ring finger protein 182 // 13 A4|13 // 328234 /// ENSMUST0000005	Rnf182	NM_183204	0.464474	-2.15297	SGa62010 down vs IFskina6-2010	0.477612	-2.09375	SGa6-2011 down vs IFskina6-2011
28251	10547888	NM_013533 // Gpr162 // G protein-coupled receptor 162 // 6 F2|6 60.18 cM // 14788 /// E	Gpr162	NM_013533	0.464791	-2.1515	SGa62010 down vs IFskina6-2010	0.342718	-2.91785	SGa6-2011 down vs IFskina6-2011
14625	10419429	NM_001011530 // Olfr723 // olfactory receptor 723 // 14 C1|14 // 259147 /// NM_146492 /	Olfr723	NM_001011530	0.465102	-2.15007	SGa62010 down vs IFskina6-2010	0.42253	-2.3667	SGa6-2011 down vs IFskina6-2011
20704	10476931	NM_021405 // Cst10 // cystatin 10 (chondrocytes) // 2 G3|2 // 58214 /// ENSMUST00000109	Cst10	NM_021405	0.465285	-2.14922	SGa62010 down vs IFskina6-2010	0.430147	-2.32479	SGa6-2011 down vs IFskina6-2011
21509	10484781	NM_146818 // Olfr1218 // olfactory receptor 1218 // 2 E1|2 // 258815 /// ENSMUST0000009	Olfr1218	NM_146818	0.465377	-2.1488	SGa62010 down vs IFskina6-2010	0.415924	-2.40429	SGa6-2011 down vs IFskina6-2011
14627	10419435	NM_146317 // Olfr725 // olfactory receptor 725 // 14 C3-D1|14 // 258314 /// ENSMUST0000	Olfr725	NM_146317	0.465443	-2.14849	SGa62010 down vs IFskina6-2010	0.304319	-3.28602	SGa6-2011 down vs IFskina6-2011
15418	10427297	NM_175730 // Hoxc5 // homeobox C5 // 15 F3|15 57.4 cM // 15424 /// ENSMUST00000001709 /	Hoxc5	NM_175730	0.465769	-2.14699	SGa62010 down vs IFskina6-2010	0.327437	-3.05402	SGa6-2011 down vs IFskina6-2011
31087	10570585	NM_001113350 // Xkr5 // X Kell blood group precursor-related family, member 5 // 8 A1.3	Xkr5	NM_001113350	0.465773	-2.14697	SGa62010 down vs IFskina6-2010	0.419327	-2.38477	SGa6-2011 down vs IFskina6-2011
7905	10357529	NR_028304 // C4bp-ps1 // complement component 4 binding protein, pseudogene 1 // 1 E4|1	C4bp-ps1	NR_028304	0.465859	-2.14657	SGa62010 down vs IFskina6-2010	0.442351	-2.26065	SGa6-2011 down vs IFskina6-2011
23461	10502881	NM_012028 // St6galnac5 // ST6 (alpha-N-acetyl-neuraminyl-2,3-beta-galactosyl-1,3)-N-ac	St6galnac5	NM_012028	0.465869	-2.14653	SGa62010 down vs IFskina6-2010	0.43818	-2.28217	SGa6-2011 down vs IFskina6-2011
11361	10390823	NM_027574 // Krt28 // keratin 28 // 11 D|11 // 70843 /// ENSMUST00000006963 // Krt28 //	Krt28	NM_027574	0.466539	-2.14344	SGa62010 down vs IFskina6-2010	0.305005	-3.27863	SGa6-2011 down vs IFskina6-2011
12959	10405566	NM_177809 // Slc25a48 // solute carrier family 25, member 48 // 13 B1|13 // 328258 ///	Slc25a48	NM_177809	0.466729	-2.14257	SGa62010 down vs IFskina6-2010	0.438662	-2.27966	SGa6-2011 down vs IFskina6-2011
13624	10410644	NM_001081680 // Zfp72 // zinc finger protein 72 // 13 C1|13 // 238722 /// ENSMUST000000	Zfp72	NM_001081680	0.468183	-2.13592	SGa62010 down vs IFskina6-2010	0.431255	-2.31882	SGa6-2011 down vs IFskina6-2011
11800	10395356	NM_207531 // Agr3 // anterior gradient homolog 3 (Xenopus laevis) // 12 A3|12 // 403205	Agr3	NM_207531	0.4683	-2.13538	SGa62010 down vs IFskina6-2010	0.474989	-2.10531	SGa6-2011 down vs IFskina6-2011
20380	10473809	NM_011355 // Sfpi1 // SFFV proviral integration 1 // 2 E3|2 47.5 cM // 20375 /// ENSMUS	Sfpi1	NM_011355	0.468549	-2.13425	SGa62010 down vs IFskina6-2010	0.416611	-2.40032	SGa6-2011 down vs IFskina6-2011
33475	10592652	AK035675 // 9530085L02Rik // RIKEN cDNA 9530085L02 gene // 9 A5.1|9 // 442822	9530085L02Rik	AK035675	0.468791	-2.13315	SGa62010 down vs IFskina6-2010	0.430039	-2.32537	SGa6-2011 down vs IFskina6-2011
26320	10530269	NM_178446 // Rbm47 // RNA binding motif protein 47 // 5 C3.1|5 // 245945 /// NM_0011273	Rbm47	NM_178446	0.469625	-2.12936	SGa62010 down vs IFskina6-2010	0.406712	-2.45874	SGa6-2011 down vs IFskina6-2011
29505	10558596	NM_153783 // Paox // polyamine oxidase (exo-N4-amino) // 7 F4|7 // 212503 /// ENSMUST00	Paox	NM_153783	0.469889	-2.12816	SGa62010 down vs IFskina6-2010	0.440047	-2.27249	SGa6-2011 down vs IFskina6-2011
14315	10416533	NM_175369 // Ccdc122 // coiled-coil domain containing 122 // 14 D3|14 // 108811 /// ENS	Ccdc122	NM_175369	0.469946	-2.1279	SGa62010 down vs IFskina6-2010	0.421786	-2.37087	SGa6-2011 down vs IFskina6-2011				Signal Transduction
20420	10474223	NM_181858 // Cd59b // CD59b antigen // 2 E2|2 // 333883 /// ENSMUST00000111130 // Cd59b	Cd59b	NM_181858	0.470313	-2.12624	SGa62010 down vs IFskina6-2010	0.413534	-2.41818	SGa6-2011 down vs IFskina6-2011
26426	10531201	NM_177872 // Adamts3 // a disintegrin-like and metallopeptidase (reprolysin type) with	Adamts3	NM_177872	0.470972	-2.12327	SGa62010 down vs IFskina6-2010	0.270002	-3.70368	SGa6-2011 down vs IFskina6-2011				Protein Transport/Receptor
26328	10530360	NM_175519 // Kctd8 // potassium channel tetramerisation domain containing 8 // 5 C3.1|5	Kctd8	NM_175519	0.471198	-2.12225	SGa62010 down vs IFskina6-2010	0.4828	-2.07125	SGa6-2011 down vs IFskina6-2011				Cell Junction/Cytoskeleton
11527	10392476	NM_027038 // 1700012B07Rik // RIKEN cDNA 1700012B07 gene // 11 E1|11 // 69324 /// NM_00	1700012B07Rik	NM_027038	0.471342	-2.1216	SGa62010 down vs IFskina6-2010	0.367265	-2.72283	SGa6-2011 down vs IFskina6-2011
34498	10601534	NM_001081661 // 4930524E20Rik // RIKEN cDNA 4930524E20 gene // X E1|X // 75097	4930524E20Rik	NM_001081661	0.471428	-2.12121	SGa62010 down vs IFskina6-2010	0.331608	-3.0156	SGa6-2011 down vs IFskina6-2011				?
9415	10371662	NM_011461 // Spic // Spi-C transcription factor (Spi-1/PU.1 related) // 10|10 C // 2072	Spic	NM_011461	0.471574	-2.12056	SGa62010 down vs IFskina6-2010	0.473227	-2.11315	SGa6-2011 down vs IFskina6-2011				Receptor
14304	10416451	NM_019775 // Cpb2 // carboxypeptidase B2 (plasma) // 14|14 D2 // 56373 /// ENSMUST00000	Cpb2	NM_019775	0.472529	-2.11627	SGa62010 down vs IFskina6-2010	0.455183	-2.19692	SGa6-2011 down vs IFskina6-2011				Receptor
17530	10447239	NM_026180 // Abcg8 // ATP-binding cassette, sub-family G (WHITE), member 8 // 17 E4|17	Abcg8	NM_026180	0.472691	-2.11555	SGa62010 down vs IFskina6-2010	0.43412	-2.30351	SGa6-2011 down vs IFskina6-2011
34712	10603308	NR_029574 // Mir188 // microRNA 188 // X|X // 387183	Mir188	NR_029574	0.472769	-2.1152	SGa62010 down vs IFskina6-2010	0.489257	-2.04391	SGa6-2011 down vs IFskina6-2011
26730	10534324	NM_010717 // Limk1 // LIM-domain containing, protein kinase // 5 G2|5 75.0 cM // 16885	Limk1	NM_010717	0.472867	-2.11476	SGa62010 down vs IFskina6-2010	0.402606	-2.48381	SGa6-2011 down vs IFskina6-2011
35213	10606941	NM_001037915 // Ripply1 // ripply1 homolog (zebrafish) // X F1|X // 622473 /// ENSMUST0	Ripply1	NM_001037915	0.473183	-2.11335	SGa62010 down vs IFskina6-2010	0.384228	-2.60262	SGa6-2011 down vs IFskina6-2011
15143	10424662	NM_028216 // Psca // prostate stem cell antigen // 15 D3|15 // 72373 /// ENSMUST0000002	Psca	NM_028216	0.47377	-2.11073	SGa62010 down vs IFskina6-2010	0.431484	-2.31758	SGa6-2011 down vs IFskina6-2011
30914	10568826	ENSMUST00000140820 // 9330101J02Rik // RIKEN cDNA 9330101J02 gene // 7 F4|7 // 664857 /	9330101J02Rik	ENSMUST00000140820	0.473881	-2.11023	SGa62010 down vs IFskina6-2010	0.475753	-2.10193	SGa6-2011 down vs IFskina6-2011
25141	10518209	NM_027056 // 1700012P22Rik // RIKEN cDNA 1700012P22 gene // 4 E1|4 // 69364 /// ENSMUST	1700012P22Rik	NM_027056	0.474576	-2.10714	SGa62010 down vs IFskina6-2010	0.41061	-2.4354	SGa6-2011 down vs IFskina6-2011
7414	10352497	NR_034044 // Snora36b // small nucleolar RNA, H/ACA box 36B // 1|1 // 100217449 /// NR_	Snora36b	NR_034044	0.475214	-2.10432	SGa62010 down vs IFskina6-2010	0.389054	-2.57034	SGa6-2011 down vs IFskina6-2011
24546	10512827	BC028561 // Gm568 // predicted gene 568 // 4 B1|4 // 230143	Gm568	BC028561	0.475219	-2.10429	SGa62010 down vs IFskina6-2010	0.414199	-2.4143	SGa6-2011 down vs IFskina6-2011
24241	10510090	NM_177571 // Gm13103 // predicted gene 13103 // 4 E1|4 // 194225 /// ENSMUST00000094522	Gm13103	NM_177571	0.475352	-2.1037	SGa62010 down vs IFskina6-2010	0.362579	-2.75802	SGa6-2011 down vs IFskina6-2011
17126	10443117	NM_007523 // Bak1 // BCL2-antagonist/killer 1 // 17|17 B // 12018 /// ENSMUST0000007869	Bak1	NM_007523	0.475657	-2.10236	SGa62010 down vs IFskina6-2010	0.355276	-2.81471	SGa6-2011 down vs IFskina6-2011
26401	10531087	NM_019878 // Sult1b1 // sulfotransferase family 1B, member 1 // 5 E1|5 // 56362 /// ENS	Sult1b1	NM_019878	0.47579	-2.10177	SGa62010 down vs IFskina6-2010	0.43505	-2.29858	SGa6-2011 down vs IFskina6-2011
7273	10351197	NM_011346 // Sell // selectin, lymphocyte // 1 H2.2|1 86.6 cM // 20343 /// NM_001164059	Sell	NM_011346	0.475837	-2.10156	SGa62010 down vs IFskina6-2010	0.480585	-2.0808	SGa6-2011 down vs IFskina6-2011
25110	10517901	NM_024412 // Clcnka // chloride channel Ka // 4 E1|4 // 12733 /// NM_001146307 // Clcnk	Clcnka	NM_024412	0.476916	-2.09681	SGa62010 down vs IFskina6-2010	0.422642	-2.36607	SGa6-2011 down vs IFskina6-2011
7799	10356457	NM_008299 // Dnajb3 // DnaJ (Hsp40) homolog, subfamily B, member 3 // 1 D|1 // 15504 //	Dnajb3	NM_008299	0.477321	-2.09503	SGa62010 down vs IFskina6-2010	0.351107	-2.84813	SGa6-2011 down vs IFskina6-2011
12148	10398430	NR_030437 // Mir496 // microRNA 496 // 12|12 // 751524	Mir496	NR_030437	0.477321	-2.09503	SGa62010 down vs IFskina6-2010	0.267826	-3.73376	SGa6-2011 down vs IFskina6-2011
22930	10498158	ENSMUST00000099099 // Gm10726 // predicted gene 10726 // --- // 100038482	Gm10726	ENSMUST00000099099	0.478119	-2.09153	SGa62010 down vs IFskina6-2010	0.470276	-2.12641	SGa6-2011 down vs IFskina6-2011
7506	10353333	NM_001039123 // Defb18 // defensin beta 18 // 1 A3|1 // 654460 /// ENSMUST00000097818 /	Defb18	NM_001039123	0.478203	-2.09116	SGa62010 down vs IFskina6-2010	0.477902	-2.09248	SGa6-2011 down vs IFskina6-2011
13341	10408386	NM_023741 // Prl8a8 // prolactin family 8, subfamily a, member 81 // 13 A3.1|13 // 7418	Prl8a8	NM_023741	0.478288	-2.09079	SGa62010 down vs IFskina6-2010	0.497824	-2.00874	SGa6-2011 down vs IFskina6-2011
30553	10566241	NM_147098 // Olfr630 // olfactory receptor 630 // 7 E3|7 // 259102 /// ENSMUST000000528	Olfr630	NM_147098	0.478637	-2.08926	SGa62010 down vs IFskina6-2010	0.467607	-2.13855	SGa6-2011 down vs IFskina6-2011
19223	10463027	NM_007815 // Cyp2c29 // cytochrome P450, family 2, subfamily c, polypeptide 29 // 19 27	Cyp2c29	NM_007815	0.47879	-2.0886	SGa62010 down vs IFskina6-2010	0.192021	-5.20776	SGa6-2011 down vs IFskina6-2011
11597	10393404	XM_003085765 // LOC100505199 // hypothetical protein LOC100505199 // --- // 100505199	LOC100505199	XM_003085765	0.478882	-2.0882	SGa62010 down vs IFskina6-2010	0.438687	-2.27953	SGa6-2011 down vs IFskina6-2011
6977	10348131	NM_007432 // Akp3 // alkaline phosphatase 3, intestine, not Mn requiring // 1 D|1 51.7	Akp3	NM_007432	0.479169	-2.08695	SGa62010 down vs IFskina6-2010	0.444316	-2.25065	SGa6-2011 down vs IFskina6-2011				Receptor
21650	10485779	NM_146403 // Olfr1295 // olfactory receptor 1295 // 2 E5|2 // 258398 /// ENSMUST0000009	Olfr1295	NM_146403	0.479463	-2.08567	SGa62010 down vs IFskina6-2010	0.409152	-2.44408	SGa6-2011 down vs IFskina6-2011
6834	10346592	NM_001033449 // Als2cr4 // amyotrophic lateral sclerosis 2 (juvenile) chromosome region	Als2cr4	NM_001033449	0.479707	-2.08461	SGa62010 down vs IFskina6-2010	0.376231	-2.65794	SGa6-2011 down vs IFskina6-2011
21985	10489484	NM_011521 // Sdc4 // syndecan 4 // 2 H3|2 94.0 cM // 20971 /// ENSMUST00000017153 // Sd	Sdc4	NM_011521	0.479968	-2.08347	SGa62010 down vs IFskina6-2010	0.217616	-4.59525	SGa6-2011 down vs IFskina6-2011
12464	10401320	NM_009620 // Adam4 // a disintegrin and metallopeptidase domain 4 // 12 D1|12 // 11498	Adam4	NM_009620	0.480333	-2.08189	SGa62010 down vs IFskina6-2010	0.31035	-3.22217	SGa6-2011 down vs IFskina6-2011
25930	10526241	NM_009902 // Cldn3 // claudin 3 // 5 G2|5 75.0 cM // 12739 /// ENSMUST00000094245 // Cl	Cldn3	NM_009902	0.480707	-2.08027	SGa62010 down vs IFskina6-2010	0.42409	-2.35799	SGa6-2011 down vs IFskina6-2011
14729	10420280	NM_010375 // Gzmg // granzyme G // 14 C3|14 20.5 cM // 14944 /// ENSMUST00000015578 //	Gzmg	NM_010375	0.480864	-2.07959	SGa62010 down vs IFskina6-2010	0.484356	-2.0646	SGa6-2011 down vs IFskina6-2011				Cell Adhesion
29871	10561376	NM_007866 // Dll3 // delta-like 3 (Drosophila) // 7 A3|7 10.0 cM // 13389 /// ENSMUST00	Dll3	NM_007866	0.481297	-2.07772	SGa62010 down vs IFskina6-2010	0.417815	-2.3934	SGa6-2011 down vs IFskina6-2011
11714	10394685	NM_008747 // Ntsr2 // neurotensin receptor 2 // 12 A1.1|12 6.0 cM // 18217 /// ENSMUST0	Ntsr2	NM_008747	0.481471	-2.07697	SGa62010 down vs IFskina6-2010	0.454623	-2.19962	SGa6-2011 down vs IFskina6-2011
14486	10417933	NM_021508 // Myoz1 // myozenin 1 // 14 A3|14 // 59011 /// ENSMUST00000090469 // Myoz1 /	Myoz1	NM_021508	0.481473	-2.07696	SGa62010 down vs IFskina6-2010	0.348117	-2.8726	SGa6-2011 down vs IFskina6-2011
12647	10403028	ENSMUST00000103521 // LOC382693 // similar to immunoglobulin heavy chain // 12 F2|12 //	LOC382693	ENSMUST00000103521	0.481833	-2.07541	SGa62010 down vs IFskina6-2010	0.47744	-2.0945	SGa6-2011 down vs IFskina6-2011
17097	10442857	NM_026238 // Narfl // nuclear prelamin A recognition factor-like // 17 A3.3|17 // 67563	Narfl	NM_026238	0.482576	-2.07221	SGa62010 down vs IFskina6-2010	0.43116	-2.31932	SGa6-2011 down vs IFskina6-2011
15419	10427301	NR_030526 // Mir615 // microRNA 615 // 15|15 // 751557	Mir615	NR_030526	0.483432	-2.06854	SGa62010 down vs IFskina6-2010	0.401123	-2.493	SGa6-2011 down vs IFskina6-2011
26638	10533122	NM_133902 // Sdsl // serine dehydratase-like // 5 F|5 // 257635 /// ENSMUST00000031594	Sdsl	NM_133902	0.483447	-2.06848	SGa62010 down vs IFskina6-2010	0.464729	-2.15179	SGa6-2011 down vs IFskina6-2011
15722	10429951	XM_982916 // Gm8140 // predicted gene 8140 // 15 D3|15 // 666504	Gm8140	XM_982916	0.483691	-2.06744	SGa62010 down vs IFskina6-2010	0.219488	-4.55606	SGa6-2011 down vs IFskina6-2011
17826	10449971	NM_028543 // Zfp763 // zinc finger protein 763 // 17 B1|17 // 73451 /// ENSMUST00000087	Zfp763	NM_028543	0.484696	-2.06315	SGa62010 down vs IFskina6-2010	0.367265	-2.72283	SGa6-2011 down vs IFskina6-2011
12129	10398392	NR_029762 // Mir329 // microRNA 329 // 12|12 // 723842	Mir329	NR_029762	0.484753	-2.0629	SGa62010 down vs IFskina6-2010	0.229818	-4.35128	SGa6-2011 down vs IFskina6-2011
34833	10604157	ENSMUST00000089286 // 4930525M21Rik // RIKEN cDNA 4930525M21 gene // X A3.3|X // 436199	4930525M21Rik	ENSMUST00000089286	0.484841	-2.06253	SGa62010 down vs IFskina6-2010	0.196014	-5.10167	SGa6-2011 down vs IFskina6-2011
29210	10555809	NM_001025386 // Olfr243 // olfactory receptor 243 // 7 E3|7 // 436002 /// NM_001025386	Olfr243	NM_001025386	0.484841	-2.06253	SGa62010 down vs IFskina6-2010	0.289476	-3.45452	SGa6-2011 down vs IFskina6-2011
18618	10457614	NM_009700 // Aqp4 // aquaporin 4 // 18 A1|18 6.0 cM // 11829 /// ENSMUST00000079081 //	Aqp4	NM_009700	0.484875	-2.06239	SGa62010 down vs IFskina6-2010	0.473323	-2.11272	SGa6-2011 down vs IFskina6-2011
34236	10599487	NM_028773 // Sash3 // SAM and SH3 domain containing 3 // X A4|X // 74131 /// ENSMUST000	Sash3	NM_028773	0.48529	-2.06062	SGa62010 down vs IFskina6-2010	0.490172	-2.0401	SGa6-2011 down vs IFskina6-2011
33983	10597878	NM_153540 // C85492 // expressed sequence C85492 // 9 F4|9 // 215494 /// ENSMUST0000008	C85492	NM_153540	0.485376	-2.06026	SGa62010 down vs IFskina6-2010	0.391576	-2.55378	SGa6-2011 down vs IFskina6-2011
13296	10408142	NM_134216 // Vmn1r206 // vomeronasal 1 receptor 206 // 13 A3.1|13 // 171250 /// ENSMUST	Vmn1r206	NM_134216	0.485402	-2.06015	SGa62010 down vs IFskina6-2010	0.471708	-2.11996	SGa6-2011 down vs IFskina6-2011
7473	10353038	NM_145692 // Lrrc67 // leucine rich repeat containing 67 // 1 A2|1 // 69312 /// NM_0270	Lrrc67	NM_145692	0.485837	-2.0583	SGa62010 down vs IFskina6-2010	0.199666	-5.00837	SGa6-2011 down vs IFskina6-2011
14396	10417181	ENSMUST00000100294 // Gm10837 // predicted gene 10837 // 14 E5|14 // 100038380	Gm10837	ENSMUST00000100294	0.486048	-2.05741	SGa62010 down vs IFskina6-2010	0.478687	-2.08905	SGa6-2011 down vs IFskina6-2011
17189	10443933	ENSMUST00000039217 // Gm10103 // predicted gene 10103 // 17 B1|17 // 383232	Gm10103	ENSMUST00000039217	0.486122	-2.0571	SGa62010 down vs IFskina6-2010	0.372692	-2.68318	SGa6-2011 down vs IFskina6-2011				???
33737	10595324	NM_010482 // Htr1b // 5-hydroxytryptamine (serotonin) receptor 1B // 9 E1|9 46.0 cM //	Htr1b	NM_010482	0.486742	-2.05448	SGa62010 down vs IFskina6-2010	0.38739	-2.58138	SGa6-2011 down vs IFskina6-2011
9660	10373944	NM_026015 // Zmat5 // zinc finger, matrin type 5 // 11 A1|11 3.0 cM // 67178 /// ENSMUS	Zmat5	NM_026015	0.487022	-2.0533	SGa62010 down vs IFskina6-2010	0.35919	-2.78404	SGa6-2011 down vs IFskina6-2011
32525	10583759	NM_001164614 // Ccdc159 // coiled-coil domain containing 159 // 9|9 A4 // 67119 /// NM_	Ccdc159	NM_001164614	0.487225	-2.05244	SGa62010 down vs IFskina6-2010	0.483812	-2.06692	SGa6-2011 down vs IFskina6-2011				Intermediate Filament
6928	10347726	XM_003086206 // LOC100504876 // 60S ribosomal protein L7a-like // --- // 100504876	LOC100504876	XM_003086206	0.487786	-2.05008	SGa62010 down vs IFskina6-2010	0.344505	-2.90272	SGa6-2011 down vs IFskina6-2011				Intermediate Filament
26196	10529018	NM_028483 // Cib4 // calcium and integrin binding family member 4 // 5 B1|5 // 73259 //	Cib4	NM_028483	0.48799	-2.04922	SGa62010 down vs IFskina6-2010	0.432493	-2.31218	SGa6-2011 down vs IFskina6-2011				ECM/Cell Adhesion/Signal
29209	10555807	NM_146841 // Olfr617 // olfactory receptor 617 // 7 E3|7 // 258838 /// ENSMUST000000482	Olfr617	NM_146841	0.489236	-2.044	SGa62010 down vs IFskina6-2010	0.347109	-2.88094	SGa6-2011 down vs IFskina6-2011				ECM/Cell Adhesion/Signal
11756	10394929	AK132630 // Gm9292 // predicted gene 9292 // 12 A1.3|12 // 668662 /// XR_105458 // Gm92	Gm9292	AK132630	0.489287	-2.04379	SGa62010 down vs IFskina6-2010	0.181301	-5.5157	SGa6-2011 down vs IFskina6-2011
19891	10469565	NM_018809 // Ptf1a // pancreas specific transcription factor, 1a // 2|2 A2 // 19213 ///	Ptf1a	NM_018809	0.489319	-2.04366	SGa62010 down vs IFskina6-2010	0.228117	-4.38372	SGa6-2011 down vs IFskina6-2011
33181	10590169	NM_007397 // Acvr2b // activin receptor IIB // 9 F3|9 // 11481 /// ENSMUST00000035093 /	Acvr2b	NM_007397	0.489365	-2.04346	SGa62010 down vs IFskina6-2010	0.406006	-2.46302	SGa6-2011 down vs IFskina6-2011
23406	10502395	BC150693 // 4930579F01Rik // RIKEN cDNA 4930579F01 gene // 3|3 H2 // 67741 /// NM_00116	4930579F01Rik	BC150693	0.489416	-2.04325	SGa62010 down vs IFskina6-2010	0.476727	-2.09764	SGa6-2011 down vs IFskina6-2011
11574	10393098	NM_016852 // Wbp2 // WW domain binding protein 2 // 11 E2|11 // 22378 /// ENSMUST000000	Wbp2	NM_016852	0.489626	-2.04237	SGa62010 down vs IFskina6-2010	0.245383	-4.07526	SGa6-2011 down vs IFskina6-2011
10070	10377841	NM_029360 // Tm4sf5 // transmembrane 4 superfamily member 5 // 11 B3|11 // 75604 /// EN	Tm4sf5	NM_029360	0.490687	-2.03796	SGa62010 down vs IFskina6-2010	0.404581	-2.47169	SGa6-2011 down vs IFskina6-2011
14778	10420721	NM_001037751 // Defb48 // defensin beta 48 // 14 D1|14 // 432867 /// ENSMUST00000100493	Defb48	NM_001037751	0.49075	-2.0377	SGa62010 down vs IFskina6-2010	0.289147	-3.45845	SGa6-2011 down vs IFskina6-2011
11302	10390184	ENSMUST00000062249 // Gm9796 // predicted gene 9796 // 11 D|11 // 544809	Gm9796	ENSMUST00000062249	0.490948	-2.03688	SGa62010 down vs IFskina6-2010	0.361528	-2.76604	SGa6-2011 down vs IFskina6-2011				Intermediate Filament
15966	10432661	NM_001161767 // Galnt6 // UDP-N-acetyl-alpha-D-galactosamine:polypeptide N-acetylgalact	Galnt6	NM_001161767	0.491017	-2.03659	SGa62010 down vs IFskina6-2010	0.244787	-4.08519	SGa6-2011 down vs IFskina6-2011
26941	10536353	NM_010057 // Dlx6 // distal-less homeobox 6 // 6 A1|6 2.0 cM // 13396 /// EF535989 // D	Dlx6	NM_010057	0.491218	-2.03575	SGa62010 down vs IFskina6-2010	0.386455	-2.58762	SGa6-2011 down vs IFskina6-2011
15965	10432652	NM_033612 // Cela1 // chymotrypsin-like elastase family, member 1 // 15 F1-F3|15 56.8 c	Cela1	NM_033612	0.49133	-2.03529	SGa62010 down vs IFskina6-2010	0.495455	-2.01835	SGa6-2011 down vs IFskina6-2011
7260	10351095	NM_009452 // Tnfsf4 // tumor necrosis factor (ligand) superfamily, member 4 // 1 H2.1|1	Tnfsf4	NM_009452	0.491678	-2.03385	SGa62010 down vs IFskina6-2010	0.492553	-2.03024	SGa6-2011 down vs IFskina6-2011
21383	10484482	NM_199223 // Rtn4rl2 // reticulon 4 receptor-like 2 // 2 D|2 // 269295 /// ENSMUST00000	Rtn4rl2	NM_199223	0.492207	-2.03166	SGa62010 down vs IFskina6-2010	0.462451	-2.16239	SGa6-2011 down vs IFskina6-2011
13611	10410501	NM_010573 // Irx1 // Iroquois related homeobox 1 (Drosophila) // 13 C1|13 43.0 cM // 16	Irx1	NM_010573	0.492331	-2.03115	SGa62010 down vs IFskina6-2010	0.290786	-3.43895	SGa6-2011 down vs IFskina6-2011
22981	10498526	NR_027955 // 4931440P22Rik // RIKEN cDNA 4931440P22 gene // 3 E1|3 // 71004 /// ENSMUST	4931440P22Rik	NR_027955	0.492343	-2.03111	SGa62010 down vs IFskina6-2010	0.401644	-2.48977	SGa6-2011 down vs IFskina6-2011
13023	10405938	NM_198322 // Zfp273 // zinc finger protein 273 // 13 B3|13 // 212569 /// ENSMUST0000001	Zfp273	NM_198322	0.493927	-2.02459	SGa62010 down vs IFskina6-2010	0.316301	-3.16154	SGa6-2011 down vs IFskina6-2011				ECM/Signal
32651	10584514	NM_146610 // Olfr972 // olfactory receptor 972 // 9 A5-B|9 // 258603 /// ENSMUST0000007	Olfr972	NM_146610	0.493943	-2.02452	SGa62010 down vs IFskina6-2010	0.388786	-2.57211	SGa6-2011 down vs IFskina6-2011
30932	10568964	NM_146520 // Olfr536 // olfactory receptor 536 // 7 F4|7 // 258513 /// ENSMUST000000643	Olfr536	NM_146520	0.494045	-2.02411	SGa62010 down vs IFskina6-2010	0.480227	-2.08235	SGa6-2011 down vs IFskina6-2011
30670	10566700	NM_146725 // Olfr516 // olfactory receptor 516 // 7 E3|7 // 258720 /// ENSMUST000000714	Olfr516	NM_146725	0.494377	-2.02275	SGa62010 down vs IFskina6-2010	0.306386	-3.26386	SGa6-2011 down vs IFskina6-2011
26793	10535017	NM_001033416 // Gal3st4 // galactose-3-O-sulfotransferase 4 // 5 G2|5 // 330217 /// ENS	Gal3st4	NM_001033416	0.494753	-2.02121	SGa62010 down vs IFskina6-2010	0.400384	-2.4976	SGa6-2011 down vs IFskina6-2011
7806	10356498	NM_029122 // Iqca // IQ motif containing with AAA domain // 1 D|1 // 74918 /// ENSMUST0	Iqca	NM_029122	0.495011	-2.02016	SGa62010 down vs IFskina6-2010	0.476558	-2.09838	SGa6-2011 down vs IFskina6-2011
13340	10408379	NM_011167 // Prl8a6 // prolactin family 8, subfamily a, member 6 // 13 A3.1|13 14.0 cM	Prl8a6	NM_011167	0.495255	-2.01916	SGa62010 down vs IFskina6-2010	0.425549	-2.34991	SGa6-2011 down vs IFskina6-2011
12046	10397792	NM_173023 // Catsperb // cation channel, sperm-associated, beta // 12 E|12 // 271036 //	Catsperb	NM_173023	0.495802	-2.01694	SGa62010 down vs IFskina6-2010	0.497244	-2.01108	SGa6-2011 down vs IFskina6-2011
29085	10554745	NM_001105189 // Vmn2r78 // vomeronasal 2, receptor 78 // 7 D3|7 // 637896	Vmn2r78	NM_001105189	0.496081	-2.0158	SGa62010 down vs IFskina6-2010	0.284613	-3.51354	SGa6-2011 down vs IFskina6-2011
24993	10516776	ENSMUST00000070532 // Fabp3 // fatty acid binding protein 3, muscle and heart // 4 D2.2	Fabp3	ENSMUST00000070532	0.496174	-2.01542	SGa62010 down vs IFskina6-2010	0.437311	-2.2867	SGa6-2011 down vs IFskina6-2011				ECM/Signal
21555	10484886	NM_146975 // Olfr1273-ps // olfactory receptor 1273, pseudogene // 2 E1|2 // 258977 ///	Olfr1273-ps	NM_146975	0.496238	-2.01516	SGa62010 down vs IFskina6-2010	0.373773	-2.67542	SGa6-2011 down vs IFskina6-2011
20735	10477134	NM_001037247 // Defb36 // defensin beta 36 // 2 H1|2 // 266620 /// ENSMUST00000058086 /	Defb36	NM_001037247	0.497438	-2.0103	SGa62010 down vs IFskina6-2010	0.403985	-2.47534	SGa6-2011 down vs IFskina6-2011
24952	10516335	NM_011902 // Tekt2 // tektin 2 // 4 D2.2|4 // 24084 /// ENSMUST00000102616 // Tekt2 //	Tekt2	NM_011902	0.497751	-2.00904	SGa62010 down vs IFskina6-2010	0.338846	-2.95119	SGa6-2011 down vs IFskina6-2011
9618	10373645	NM_146552 // Olfr811 // olfactory receptor 811 // 10 D3|10 // 258545 /// ENSMUST0000007	Olfr811	NM_146552	0.497818	-2.00877	SGa62010 down vs IFskina6-2010	0.489261	-2.0439	SGa6-2011 down vs IFskina6-2011
26734	10534395	NM_009903 // Cldn4 // claudin 4 // 5 G2|5 75.0 cM // 12740 /// ENSMUST00000051401 // Cl	Cldn4	NM_009903	0.497825	-2.00874	SGa62010 down vs IFskina6-2010	0.0292357	-34.2047	SGa6-2011 down vs IFskina6-2011
20415	10474181	NM_178890 // Abtb2 // ankyrin repeat and BTB (POZ) domain containing 2 // 2 E2|2 // 993	Abtb2	NM_178890	0.498059	-2.00779	SGa62010 down vs IFskina6-2010	0.297501	-3.36134	SGa6-2011 down vs IFskina6-2011
24857	10515613	NM_011213 // Ptprf // protein tyrosine phosphatase, receptor type, F // 4|4 C6-D1 // 19	Ptprf	NM_011213	0.498343	-2.00665	SGa62010 down vs IFskina6-2010	0.425406	-2.35069	SGa6-2011 down vs IFskina6-2011
33010	10588081	NM_012020 // Foxl2 // forkhead box L2 // 9|9 E4 // 26927 /// ENSMUST00000051312 // Foxl	Foxl2	NM_012020	0.4987	-2.00521	SGa62010 down vs IFskina6-2010	0.241436	-4.14188	SGa6-2011 down vs IFskina6-2011
25903	10526038	NM_011846 // Mmp17 // matrix metallopeptidase 17 // 5 G1.3|5 72.5 cM // 23948 /// ENSMU	Mmp17	NM_011846	0.49987	-2.00052	SGa62010 down vs IFskina6-2010	0.32361	-3.09014	SGa6-2011 down vs IFskina6-2011
35088	10606056	NM_001081356 // 2610030H06Rik // RIKEN cDNA 2610030H06 gene // X|X // 67048 /// BC02831	2610030H06Rik	NM_001081356	2.00589	2.00589	SGa62010 up vs IFskina6-2010	3.34425	3.34425	SGa6-2011 up vs IFskina6-2011
19632	10466972	NM_177721 // Ranbp6 // RAN binding protein 6 // 19 C1|19 // 240614 /// ENSMUST000000995	Ranbp6	NM_177721	2.02636	2.02636	SGa62010 up vs IFskina6-2010	2.41556	2.41556	SGa6-2011 up vs IFskina6-2011
28133	10546706	NM_019743 // Rybp // RING1 and YY1 binding protein // 6 E1|6 // 56353 /// ENSMUST000001	Rybp	NM_019743	2.03065	2.03065	SGa62010 up vs IFskina6-2010	9.61379	9.61379	SGa6-2011 up vs IFskina6-2011
22907	10497964	NM_027558 // Pgrmc2 // progesterone receptor membrane component 2 // 3|3 C // 70804 ///	Pgrmc2	NM_027558	2.03304	2.03304	SGa62010 up vs IFskina6-2010	2.02572	2.02572	SGa6-2011 up vs IFskina6-2011
12020	10397633	NM_201518 // Flrt2 // fibronectin leucine rich transmembrane protein 2 // 12 E|12 // 39	Flrt2	NM_201518	2.03505	2.03505	SGa62010 up vs IFskina6-2010	2.31959	2.31959	SGa6-2011 up vs IFskina6-2011
26065	10527649	BC116246 // 6330406I15Rik // RIKEN cDNA 6330406I15 gene // 5 G3|5 // 70717 /// NM_02751	6330406I15Rik	BC116246	2.03621	2.03621	SGa62010 up vs IFskina6-2010	3.07771	3.07771	SGa6-2011 up vs IFskina6-2011
29882	10561513	NM_011885 // Mrps12 // mitochondrial ribosomal protein S12 // 7 A3|7 // 24030 /// ENSMU	Mrps12	NM_011885	2.03663	2.03663	SGa62010 up vs IFskina6-2010	4.06904	4.06904	SGa6-2011 up vs IFskina6-2011
31622	10575609	NM_001037665 // Zfp1 // zinc finger protein 1 // 8 E1|8 57.0 cM // 22640 /// NM_011742	Zfp1	NM_001037665	2.03668	2.03668	SGa62010 up vs IFskina6-2010	2.27826	2.27826	SGa6-2011 up vs IFskina6-2011
13696	10411448	NM_145455 // Btf3 // basic transcription factor 3 // 13 D1|13 // 218490 /// NM_00117054	Btf3	NM_145455	2.03812	2.03812	SGa62010 up vs IFskina6-2010	2.12693	2.12693	SGa6-2011 up vs IFskina6-2011
28434	10549536	NM_001113424 // Amn1 // antagonist of mitotic exit network 1 homolog (S. cerevisiae) //	Amn1	NM_001113424	2.03884	2.03884	SGa62010 up vs IFskina6-2010	2.73454	2.73454	SGa6-2011 up vs IFskina6-2011
32911	10587042	NM_198609 // Rsl24d1 // ribosomal L24 domain containing 1 // 9 D|9 // 225215 /// BC0894	Rsl24d1	NM_198609	2.03965	2.03965	SGa62010 up vs IFskina6-2010	2.8826	2.8826	SGa6-2011 up vs IFskina6-2011
20058	10471555	NM_011923 // Angptl2 // angiopoietin-like 2 // 2 B|2 // 26360 /// ENSMUST00000004208 //	Angptl2	NM_011923	2.04244	2.04244	SGa62010 up vs IFskina6-2010	2.89348	2.89348	SGa6-2011 up vs IFskina6-2011				ECM/Signal
16328	10436304	NM_001014423 // Abi3bp // ABI gene family, member 3 (NESH) binding protein // 16 C1.1|1	Abi3bp	NM_001014423	2.04878	2.04878	SGa62010 up vs IFskina6-2010	3.12839	3.12839	SGa6-2011 up vs IFskina6-2011				ECM/Signal
8349	10361651	NM_145706 // Nup43 // nucleoporin 43 // 10 A1|10 // 69912 /// ENSMUST00000040135 // Nup	Nup43	NM_145706	2.04978	2.04978	SGa62010 up vs IFskina6-2010	2.15106	2.15106	SGa6-2011 up vs IFskina6-2011				ECM/Signal
25954	10526508	NM_025562 // Fis1 // fission 1 (mitochondrial outer membrane) homolog (yeast) // 5|5 G1	Fis1	NM_025562	2.05195	2.05195	SGa62010 up vs IFskina6-2010	2.09174	2.09174	SGa6-2011 up vs IFskina6-2011
20273	10473384	NM_021398 // Slc43a3 // solute carrier family 43, member 3 // 2 E1|2 // 58207 /// ENSMU	Slc43a3	NM_021398	2.05913	2.05913	SGa62010 up vs IFskina6-2010	3.0378	3.0378	SGa6-2011 up vs IFskina6-2011
33631	10594289	NM_033320 // Glce // glucuronyl C5-epimerase // 9 C-D|9 // 93683 /// ENSMUST00000034785	Glce	NM_033320	2.05958	2.05958	SGa62010 up vs IFskina6-2010	2.21656	2.21656	SGa6-2011 up vs IFskina6-2011
14221	10415791	NM_026001 // Rnaseh2b // ribonuclease H2, subunit B // 14 D1|14 // 67153 /// ENSMUST000	Rnaseh2b	NM_026001	2.06152	2.06152	SGa62010 up vs IFskina6-2010	2.20434	2.20434	SGa6-2011 up vs IFskina6-2011
26804	10535095	NM_133349 // Zfand2a // zinc finger, AN1-type domain 2A // 5 G2|5 // 100494 /// NM_0011	Zfand2a	NM_133349	2.06448	2.06448	SGa62010 up vs IFskina6-2010	2.38764	2.38764	SGa6-2011 up vs IFskina6-2011
7931	10357870	NM_054077 // Prelp // proline arginine-rich end leucine-rich repeat // 1 E4|1 74.3 cM /	Prelp	NM_054077	2.06467	2.06467	SGa62010 up vs IFskina6-2010	3.88646	3.88646	SGa6-2011 up vs IFskina6-2011
9606	10373620	NM_146266 // Olfr772 // olfactory receptor 772 // 10 D3|10 // 257666 /// ENSMUST0000008	Olfr772	NM_146266	2.06469	2.06469	SGa62010 up vs IFskina6-2010	2.38271	2.38271	SGa6-2011 up vs IFskina6-2011
35055	10605766	NM_019791 // Maged1 // melanoma antigen, family D, 1 // X C3|X 34.6 cM // 94275 /// ENS	Maged1	NM_019791	2.0672	2.0672	SGa62010 up vs IFskina6-2010	3.80254	3.80254	SGa6-2011 up vs IFskina6-2011
14270	10416181	NM_009285 // Stc1 // stanniocalcin 1 // 14 D2|14 // 20855 /// ENSMUST00000014957 // Stc	Stc1	NM_009285	2.07329	2.07329	SGa62010 up vs IFskina6-2010	3.62032	3.62032	SGa6-2011 up vs IFskina6-2011
28400	10549102	NM_008428 // Kcnj8 // potassium inwardly-rectifying channel, subfamily J, member 8 // 6	Kcnj8	NM_008428	2.07684	2.07684	SGa62010 up vs IFskina6-2010	2.12002	2.12002	SGa6-2011 up vs IFskina6-2011
10322	10380524	NM_016752 // Slc35b1 // solute carrier family 35, member B1 // 11 D|11 55.5 cM // 11017	Slc35b1	NM_016752	2.07814	2.07814	SGa62010 up vs IFskina6-2010	4.87201	4.87201	SGa6-2011 up vs IFskina6-2011
11932	10396740	NM_172952 // Gphn // gephyrin // 12 D2|12 // 268566 /// NM_145965 // Gphn // gephyrin /	Gphn	NM_172952	2.08431	2.08431	SGa62010 up vs IFskina6-2010	2.25877	2.25877	SGa6-2011 up vs IFskina6-2011
22448	10493789	NM_009113 // S100a13 // S100 calcium binding protein A13 // 3 F1-F2|3 43.6 cM // 20196	S100a13	NM_009113	2.08708	2.08708	SGa62010 up vs IFskina6-2010	3.37924	3.37924	SGa6-2011 up vs IFskina6-2011				Apoptosis/Cell Cycle
9351	10371006	NM_013895 // Timm13 // translocase of inner mitochondrial membrane 13 homolog (yeast) /	Timm13	NM_013895	2.08943	2.08943	SGa62010 up vs IFskina6-2010	2.63779	2.63779	SGa6-2011 up vs IFskina6-2011
27135	10538187	NM_053110 // Gpnmb // glycoprotein (transmembrane) nmb // 6 B2.3|6 21.0 cM // 93695 ///	Gpnmb	NM_053110	2.08996	2.08996	SGa62010 up vs IFskina6-2010	2.62597	2.62597	SGa6-2011 up vs IFskina6-2011
28705	10551410	NM_009560 // Zfp60 // zinc finger protein 60 // 7 A3|7 12.3 cM // 22718 /// NM_029531 /	Zfp60	NM_009560	2.09651	2.09651	SGa62010 up vs IFskina6-2010	2.04297	2.04297	SGa6-2011 up vs IFskina6-2011
24433	10511843	NM_026194 // 1810074P20Rik // RIKEN cDNA 1810074P20 gene // 4 A3|4 // 67490 /// ENSMUST	1810074P20Rik	NM_026194	2.0995	2.0995	SGa62010 up vs IFskina6-2010	3.42248	3.42248	SGa6-2011 up vs IFskina6-2011
33588	10593856	NM_172924 // C230081A13Rik // RIKEN cDNA C230081A13 gene // 9 B|9 // 244895 /// ENSMUST	C230081A13Rik	NM_172924	2.09971	2.09971	SGa62010 up vs IFskina6-2010	2.03175	2.03175	SGa6-2011 up vs IFskina6-2011
19472	10465686	NM_001003934 // Rtn3 // reticulon 3 // 19 A|19 // 20168 /// NM_001003933 // Rtn3 // ret	Rtn3	NM_001003934	2.10309	2.10309	SGa62010 up vs IFskina6-2010	3.62125	3.62125	SGa6-2011 up vs IFskina6-2011
9438	10371987	NM_019648 // Metap2 // methionine aminopeptidase 2 // 10 C2|10 // 56307 /// ENSMUST0000	Metap2	NM_019648	2.10642	2.10642	SGa62010 up vs IFskina6-2010	3.03527	3.03527	SGa6-2011 up vs IFskina6-2011
27187	10538617	NM_133737 // Lancl2 // LanC (bacterial lantibiotic synthetase component C)-like 2 // 6|	Lancl2	NM_133737	2.10907	2.10907	SGa62010 up vs IFskina6-2010	3.22182	3.22182	SGa6-2011 up vs IFskina6-2011
23248	10500808	NM_133859 // Olfml3 // olfactomedin-like 3 // 3 F2.2|3 // 99543 /// ENSMUST00000029440	Olfml3	NM_133859	2.10918	2.10918	SGa62010 up vs IFskina6-2010	3.48928	3.48928	SGa6-2011 up vs IFskina6-2011
21824	10488048	NM_021527 // Mkks // McKusick-Kaufman syndrome protein // 2 F3|2 // 59030 /// NM_001141	Mkks	NM_021527	2.11255	2.11255	SGa62010 up vs IFskina6-2010	3.85044	3.85044	SGa6-2011 up vs IFskina6-2011
27847	10544573	NM_027852 // Rarres2 // retinoic acid receptor responder (tazarotene induced) 2 // 6 B2	Rarres2	NM_027852	2.11651	2.11651	SGa62010 up vs IFskina6-2010	6.89126	6.89126	SGa6-2011 up vs IFskina6-2011
25950	10526482	NM_011293 // Polr2j // polymerase (RNA) II (DNA directed) polypeptide J // 5|5 G1 // 20	Polr2j	NM_011293	2.11857	2.11857	SGa62010 up vs IFskina6-2010	3.08821	3.08821	SGa6-2011 up vs IFskina6-2011				ECM/Signal
9106	10368409	NM_008481 // Lama2 // laminin, alpha 2 // 10 A4-B1|10 20.0 cM // 16773 /// ENSMUST00000	Lama2	NM_008481	2.11911	2.11911	SGa62010 up vs IFskina6-2010	3.34556	3.34556	SGa6-2011 up vs IFskina6-2011				Receptor
18686	10458247	NM_178005 // Lrrtm2 // leucine rich repeat transmembrane neuronal 2 // 18 B1|18 // 1070	Lrrtm2	NM_178005	2.12598	2.12598	SGa62010 up vs IFskina6-2010	2.76122	2.76122	SGa6-2011 up vs IFskina6-2011
31592	10575144	NM_025391 // Nip7 // nuclear import 7 homolog (S. cerevisiae) // 8|8 D2 // 66164 /// NR	Nip7	NM_025391	2.12704	2.12704	SGa62010 up vs IFskina6-2010	2.41975	2.41975	SGa6-2011 up vs IFskina6-2011				Cell Cycle/Protein Transport
22343	10492682	NM_133187 // Fam198b // family with sequence similarity 198, member B // 3 E3|3 // 6865	Fam198b	NM_133187	2.12921	2.12921	SGa62010 up vs IFskina6-2010	2.52771	2.52771	SGa6-2011 up vs IFskina6-2011
22127	10490818	NM_025285 // Stmn2 // stathmin-like 2 // 3 A1|3 6.6 cM // 20257 /// ENSMUST00000116348	Stmn2	NM_025285	2.13476	2.13476	SGa62010 up vs IFskina6-2010	8.21104	8.21104	SGa6-2011 up vs IFskina6-2011
6672	10344952	NM_133832 // Rdh10 // retinol dehydrogenase 10 (all-trans) // 1 A3|1 12.0 cM // 98711 /	Rdh10	NM_133832	2.14332	2.14332	SGa62010 up vs IFskina6-2010	2.11315	2.11315	SGa6-2011 up vs IFskina6-2011
9846	10375614	NM_013529 // Gfpt2 // glutamine fructose-6-phosphate transaminase 2 // 11 B1.2|11 26.0	Gfpt2	NM_013529	2.15755	2.15755	SGa62010 up vs IFskina6-2010	20.6667	20.6667	SGa6-2011 up vs IFskina6-2011
12367	10400405	NM_010907 // Nfkbia // nuclear factor of kappa light polypeptide gene enhancer in B-cel	Nfkbia	NM_010907	2.16179	2.16179	SGa62010 up vs IFskina6-2010	2.72114	2.72114	SGa6-2011 up vs IFskina6-2011
25488	10521798	NM_025755 // Pacrgl // PARK2 co-regulated-like // 5 B3|5 // 66768 /// ENSMUST0000003096	Pacrgl	NM_025755	2.16494	2.16494	SGa62010 up vs IFskina6-2010	2.40517	2.40517	SGa6-2011 up vs IFskina6-2011
23994	10507484	NM_080469 // Eri3 // exoribonuclease 3 // 4|4 D1 // 140546 /// ENSMUST00000037127 // Er	Eri3	NM_080469	2.16508	2.16508	SGa62010 up vs IFskina6-2010	2.08971	2.08971	SGa6-2011 up vs IFskina6-2011
7003	10348493	NM_008515 // Lrrfip1 // leucine rich repeat (in FLII) interacting protein 1 // 1 D|1 //	Lrrfip1	NM_008515	2.16791	2.16791	SGa62010 up vs IFskina6-2010	2.03906	2.03906	SGa6-2011 up vs IFskina6-2011
30383	10565057	NR_027976 // Wdr73 // WD repeat domain 73 // 7 D3|7 // 71968 /// NM_028026 // Wdr73 //	Wdr73	NR_027976	2.18583	2.18583	SGa62010 up vs IFskina6-2010	2.59488	2.59488	SGa6-2011 up vs IFskina6-2011
24197	10509560	NM_001048057 // Rpl38 // ribosomal protein L38 // 11|11 G1 // 67671 /// NM_023372 // Rp	Rpl38	NM_001048057	2.18805	2.18805	SGa62010 up vs IFskina6-2010	3.25755	3.25755	SGa6-2011 up vs IFskina6-2011
23558	10503534	NM_016746 // Ccnc // cyclin C // 4 A3|4 // 51813 /// NM_001122982 // Ccnc // cyclin C /	Ccnc	NM_016746	2.1887	2.1887	SGa62010 up vs IFskina6-2010	5.36699	5.36699	SGa6-2011 up vs IFskina6-2011
24364	10511258	NM_026125 // Fam132a // family with sequence similarity 132, member A // 4 E2|4 83.0 cM	Fam132a	NM_026125	2.18925	2.18925	SGa62010 up vs IFskina6-2010	2.32324	2.32324	SGa6-2011 up vs IFskina6-2011
23339	10501676	NM_008246 // Hiat1 // hippocampus abundant gene transcript 1 // 3|3 G2 // 15247 /// ENS	Hiat1	NM_008246	2.19065	2.19065	SGa62010 up vs IFskina6-2010	2.09385	2.09385	SGa6-2011 up vs IFskina6-2011
15115	10424400	NM_010849 // Myc // myelocytomatosis oncogene // 15 D2-D3|15 32.0 cM // 17869 /// NM_00	Myc	NM_010849	2.1908	2.1908	SGa62010 up vs IFskina6-2010	6.90846	6.90846	SGa6-2011 up vs IFskina6-2011
13165	10407145	NM_172593 // Mier3 // mesoderm induction early response 1, family member 3 // 13 D2.2|1	Mier3	NM_172593	2.19109	2.19109	SGa62010 up vs IFskina6-2010	4.2553	4.2553	SGa6-2011 up vs IFskina6-2011
13895	10413434	NM_001114879 // D14Abb1e // DNA segment, Chr 14, Abbott 1 expressed // 14|14 B // 21885	D14Abb1e	NM_001114879	2.19532	2.19532	SGa62010 up vs IFskina6-2010	3.78936	3.78936	SGa6-2011 up vs IFskina6-2011
14037	10414555	AY358079 // Gm7247 // predicted gene 7247 // 14 C1-C2|14 // 638695 /// ENSMUST000001629	Gm7247	AY358079	2.20018	2.20018	SGa62010 up vs IFskina6-2010	2.14385	2.14385	SGa6-2011 up vs IFskina6-2011
8757	10365199	NM_001142963 // Gm10778 // predicted gene 10778 // --- // 100233208 /// ENSMUST00000099	Gm10778	NM_001142963	2.20026	2.20026	SGa62010 up vs IFskina6-2010	2.46321	2.46321	SGa6-2011 up vs IFskina6-2011
7974	10358379	NM_013835 // Trove2 // TROVE domain family, member 2 // 1 F|1 78.7 cM // 20822 /// ENSM	Trove2	NM_013835	2.20111	2.20111	SGa62010 up vs IFskina6-2010	2.26478	2.26478	SGa6-2011 up vs IFskina6-2011
25155	10518344	NR_033612 // Gm13238 // predicted gene 13238 // 4 E1|4 // 236069 /// NM_175833 // Cdv3	Gm13238	NR_033612	2.20278	2.20278	SGa62010 up vs IFskina6-2010	4.2162	4.2162	SGa6-2011 up vs IFskina6-2011
15627	10428998	NM_010026 // Asap1 // ArfGAP with SH# domain, ankyrin repeat and PH domain1 // 15|15 D3	Asap1	NM_010026	2.20478	2.20478	SGa62010 up vs IFskina6-2010	2.31057	2.31057	SGa6-2011 up vs IFskina6-2011
23388	10502205	NM_008212 // Hadh // hydroxyacyl-Coenzyme A dehydrogenase // 3 G3|3 // 15107 /// ENSMUS	Hadh	NM_008212	2.20756	2.20756	SGa62010 up vs IFskina6-2010	2.11305	2.11305	SGa6-2011 up vs IFskina6-2011
23147	10499961	NM_001007222 // Tdpoz2 // TD and POZ domain containing 2 // 3 F2.1|3 // 399673 /// BC14	Tdpoz2	NM_001007222	2.20805	2.20805	SGa62010 up vs IFskina6-2010	2.91971	2.91971	SGa6-2011 up vs IFskina6-2011
7466	10353004	NM_025415 // Cks2 // CDC28 protein kinase regulatory subunit 2 // 13 A5|13 // 66197 ///	Cks2	NM_025415	2.21493	2.21493	SGa62010 up vs IFskina6-2010	2.31235	2.31235	SGa6-2011 up vs IFskina6-2011
8808	10365716	NM_026166 // Ikbip // IKBKB interacting protein // 10 C2|10 // 67454 /// NM_027078 // I	Ikbip	NM_026166	2.21848	2.21848	SGa62010 up vs IFskina6-2010	2.28823	2.28823	SGa6-2011 up vs IFskina6-2011
31461	10573924	NM_008610 // Mmp2 // matrix metallopeptidase 2 // 8 C5|8 44.0 cM // 17390 /// ENSMUST00	Mmp2	NM_008610	2.22406	2.22406	SGa62010 up vs IFskina6-2010	3.75468	3.75468	SGa6-2011 up vs IFskina6-2011
32462	10583320	NM_133214 // BC017612 // cDNA sequence BC017612 // 9 A2|9 // 170748 /// ENSMUST00000045	BC017612	NM_133214	2.22685	2.22685	SGa62010 up vs IFskina6-2010	2.24095	2.24095	SGa6-2011 up vs IFskina6-2011
19596	10466659	NM_010266 // Gda // guanine deaminase // 19 B|19 15.5 cM // 14544 /// ENSMUST0000008760	Gda	NM_010266	2.23045	2.23045	SGa62010 up vs IFskina6-2010	2.00063	2.00063	SGa6-2011 up vs IFskina6-2011
32199	10580986	NM_009033 // Rbmxrt // RNA binding motif protein, X chromosome retrogene // 8 C1|8 // 1	Rbmxrt	NM_009033	2.23272	2.23272	SGa62010 up vs IFskina6-2010	3.93693	3.93693	SGa6-2011 up vs IFskina6-2011
22969	10498415	NM_028136 // Dhx36 // DEAH (Asp-Glu-Ala-His) box polypeptide 36 // 3 E1|3 // 72162 ///	Dhx36	NM_028136	2.25046	2.25046	SGa62010 up vs IFskina6-2010	4.22826	4.22826	SGa6-2011 up vs IFskina6-2011
14294	10416375	NM_026119 // Med4 // mediator of RNA polymerase II transcription, subunit 4 homolog (ye	Med4	NM_026119	2.25909	2.25909	SGa62010 up vs IFskina6-2010	7.95491	7.95491	SGa6-2011 up vs IFskina6-2011
16035	10433274	NM_139307 // Vasn // vasorin // 16 A1|16 // 246154 /// ENSMUST00000038770 // Vasn // va	Vasn	NM_139307	2.26006	2.26006	SGa62010 up vs IFskina6-2010	5.08037	5.08037	SGa6-2011 up vs IFskina6-2011
28236	10547740	NM_144938 // C1s // complement component 1, s subcomponent // 6 F2|6 // 50908 /// NM_00	C1s	NM_144938	2.26024	2.26024	SGa62010 up vs IFskina6-2010	3.1541	3.1541	SGa6-2011 up vs IFskina6-2011
16550	10438313	NM_033324 // Dgcr8 // DiGeorge syndrome critical region gene 8 // 16 B1|16 10.9 cM // 9	Dgcr8	NM_033324	2.26175	2.26175	SGa62010 up vs IFskina6-2010	2.26033	2.26033	SGa6-2011 up vs IFskina6-2011
31005	10569646	NM_007631 // Ccnd1 // cyclin D1 // 7 F5|7 72.3 cM // 12443 /// ENSMUST00000093962 // Cc	Ccnd1	NM_007631	2.26607	2.26607	SGa62010 up vs IFskina6-2010	2.92834	2.92834	SGa6-2011 up vs IFskina6-2011
22980	10498519	NM_026155 // Ssr3 // signal sequence receptor, gamma // 3 E1|3 // 67437 /// ENSMUST0000	Ssr3	NM_026155	2.26856	2.26856	SGa62010 up vs IFskina6-2010	2.23166	2.23166	SGa6-2011 up vs IFskina6-2011
11275	10389842	NM_001013375 // Utp18 // UTP18, small subunit (SSU) processome component, homolog (yeas	Utp18	NM_001013375	2.28193	2.28193	SGa62010 up vs IFskina6-2010	4.24789	4.24789	SGa6-2011 up vs IFskina6-2011
23651	10504424	NM_016678 // Reck // reversion-inducing-cysteine-rich protein with kazal motifs // 4 B1	Reck	NM_016678	2.288	2.288	SGa62010 up vs IFskina6-2010	2.50277	2.50277	SGa6-2011 up vs IFskina6-2011
28053	10545917	NM_011865 // Pcbp1 // poly(rC) binding protein 1 // 6|6 D1 // 23983 /// ENSMUST00000053	Pcbp1	NM_011865	2.29512	2.29512	SGa62010 up vs IFskina6-2010	2.16343	2.16343	SGa6-2011 up vs IFskina6-2011
13013	10405892	NM_001177750 // Gm10767 // predicted gene 10767 // --- // 100038538	Gm10767	NM_001177750	2.29587	2.29587	SGa62010 up vs IFskina6-2010	4.25309	4.25309	SGa6-2011 up vs IFskina6-2011
15358	10426689	NM_139140 // Spats2 // spermatogenesis associated, serine-rich 2 // 15 F1|15 // 72572 /	Spats2	NM_139140	2.29827	2.29827	SGa62010 up vs IFskina6-2010	2.03834	2.03834	SGa6-2011 up vs IFskina6-2011
27164	10538459	NM_007472 // Aqp1 // aquaporin 1 // 6 B3|6 27.0 cM // 11826 /// ENSMUST00000004774 // A	Aqp1	NM_007472	2.30152	2.30152	SGa62010 up vs IFskina6-2010	2.57101	2.57101	SGa6-2011 up vs IFskina6-2011
16213	10435057	NM_009981 // Pcyt1a // phosphate cytidylyltransferase 1, choline, alpha isoform // 16 B	Pcyt1a	NM_009981	2.31156	2.31156	SGa62010 up vs IFskina6-2010	2.08682	2.08682	SGa6-2011 up vs IFskina6-2011
23182	10500253	NM_027541 // Prpf3 // PRP3 pre-mRNA processing factor 3 homolog (yeast) // 3|3 F2 // 70	Prpf3	NM_027541	2.31898	2.31898	SGa62010 up vs IFskina6-2010	2.16422	2.16422	SGa6-2011 up vs IFskina6-2011
14962	10422707	NM_001013367 // Prkaa1 // protein kinase, AMP-activated, alpha 1 catalytic subunit // 1	Prkaa1	NM_001013367	2.32577	2.32577	SGa62010 up vs IFskina6-2010	2.62122	2.62122	SGa6-2011 up vs IFskina6-2011
19628	10466938	NM_026362 // 5033414D02Rik // RIKEN cDNA 5033414D02 gene // 19 C1|19 // 67759 /// ENSMU	5033414D02Rik	NM_026362	2.32611	2.32611	SGa62010 up vs IFskina6-2010	4.15957	4.15957	SGa6-2011 up vs IFskina6-2011
25458	10521555	NM_025281 // Lyar // Ly1 antibody reactive clone // 5 B3|5 24.0 cM // 17089 /// ENSMUST	Lyar	NM_025281	2.32642	2.32642	SGa62010 up vs IFskina6-2010	3.64362	3.64362	SGa6-2011 up vs IFskina6-2011
10218	10379524	NM_011330 // Ccl11 // chemokine (C-C motif) ligand 11 // 11 C|11 47.0 cM // 20292 /// E	Ccl11	NM_011330	2.32749	2.32749	SGa62010 up vs IFskina6-2010	6.24636	6.24636	SGa6-2011 up vs IFskina6-2011
10509	10382257	NM_025275 // Amz2 // archaelysin family metallopeptidase 2 // 11 E1|11 70.0 cM // 13929	Amz2	NM_025275	2.32767	2.32767	SGa62010 up vs IFskina6-2010	2.36927	2.36927	SGa6-2011 up vs IFskina6-2011
18101	10452430	NM_015794 // Fbxl17 // F-box and leucine-rich repeat protein 17 // 17|17 E1.2 // 50758	Fbxl17	NM_015794	2.33723	2.33723	SGa62010 up vs IFskina6-2010	3.3669	3.3669	SGa6-2011 up vs IFskina6-2011
14688	10419825	NM_023190 // Acin1 // apoptotic chromatin condensation inducer 1 // 14 C3|14 // 56215 /	Acin1	NM_023190	2.3386	2.3386	SGa62010 up vs IFskina6-2010	2.09295	2.09295	SGa6-2011 up vs IFskina6-2011
34383	10600597	NM_138751 // Tmem47 // transmembrane protein 47 // X|X A7.2 // 192216 /// ENSMUST000000	Tmem47	NM_138751	2.34143	2.34143	SGa62010 up vs IFskina6-2010	4.50745	4.50745	SGa6-2011 up vs IFskina6-2011				Txn Regulation
15585	10428619	NM_015744 // Enpp2 // ectonucleotide pyrophosphatase/phosphodiesterase 2 // 15|15 D2 //	Enpp2	NM_015744	2.34168	2.34168	SGa62010 up vs IFskina6-2010	13.1163	13.1163	SGa6-2011 up vs IFskina6-2011
16932	10441497	NM_054040 // Tulp4 // tubby like protein 4 // 17 A1|17 3.2 cM // 68842 /// NM_001103181	Tulp4	NM_054040	2.34725	2.34725	SGa62010 up vs IFskina6-2010	2.71788	2.71788	SGa6-2011 up vs IFskina6-2011
28059	10545974	NM_054041 // Antxr1 // anthrax toxin receptor 1 // 6 D1|6 // 69538 /// ENSMUST000000420	Antxr1	NM_054041	2.34798	2.34798	SGa62010 up vs IFskina6-2010	2.97268	2.97268	SGa6-2011 up vs IFskina6-2011
13905	10413559	NM_177815 // Rft1 // RFT1 homolog (S. cerevisiae) // 14 B|14 // 328370 /// ENSMUST00000	Rft1	NM_177815	2.36555	2.36555	SGa62010 up vs IFskina6-2010	3.28021	3.28021	SGa6-2011 up vs IFskina6-2011
26629	10533050	NM_030704 // Hspb8 // heat shock protein 8 // 5 F|5 59.0 cM // 80888 /// ENSMUST0000003	Hspb8	NM_030704	2.36783	2.36783	SGa62010 up vs IFskina6-2010	4.04804	4.04804	SGa6-2011 up vs IFskina6-2011
17657	10448182	NR_030484 // Mir703 // microRNA 703 // 5|5 // 735265	Mir703	NR_030484	2.36874	2.36874	SGa62010 up vs IFskina6-2010	4.18184	4.18184	SGa6-2011 up vs IFskina6-2011
13454	10409278	NM_017373 // Nfil3 // nuclear factor, interleukin 3, regulated // 13 B1|13 32.0 cM // 1	Nfil3	NM_017373	2.3725	2.3725	SGa62010 up vs IFskina6-2010	3.86133	3.86133	SGa6-2011 up vs IFskina6-2011
7901	10357488	NM_010016 // Cd55 // CD55 antigen // 1 E4|1 67.6 cM // 13136 /// ENSMUST00000027650 //	Cd55	NM_010016	2.37568	2.37568	SGa62010 up vs IFskina6-2010	6.66672	6.66672	SGa6-2011 up vs IFskina6-2011				Cell Adhesion
11830	10395684	NM_029760 // Nubpl // nucleotide binding protein-like // 12 C1|12 // 76826 /// ENSMUST0	Nubpl	NM_029760	2.38075	2.38075	SGa62010 up vs IFskina6-2010	2.10454	2.10454	SGa6-2011 up vs IFskina6-2011
23925	10506743	BC019215 // 0610037L13Rik // RIKEN cDNA 0610037L13 gene // 4 C7|4 // 74098 /// ENSMUST0	0610037L13Rik	BC019215	2.38125	2.38125	SGa62010 up vs IFskina6-2010	2.09764	2.09764	SGa6-2011 up vs IFskina6-2011
18697	10458340	NM_010415 // Hbegf // heparin-binding EGF-like growth factor // 18 B2|18 15.0 cM // 152	Hbegf	NM_010415	2.39282	2.39282	SGa62010 up vs IFskina6-2010	3.77055	3.77055	SGa6-2011 up vs IFskina6-2011				Receptor
17358	10445434	NM_026768 // Mrps18a // mitochondrial ribosomal protein S18A // 17 C|17 // 68565 /// EN	Mrps18a	NM_026768	2.39839	2.39839	SGa62010 up vs IFskina6-2010	4.59998	4.59998	SGa6-2011 up vs IFskina6-2011
13039	10406067	NM_146047 // Clptm1l // CLPTM1-like // 13 C1|13 // 218335 /// ENSMUST00000022102 // Clp	Clptm1l	NM_146047	2.40158	2.40158	SGa62010 up vs IFskina6-2010	2.40672	2.40672	SGa6-2011 up vs IFskina6-2011
16077	10433691	NM_010946 // Ntan1 // N-terminal Asn amidase // 16 A1|16 8.7 cM // 18203 /// ENSMUST000	Ntan1	NM_010946	2.40222	2.40222	SGa62010 up vs IFskina6-2010	3.41562	3.41562	SGa6-2011 up vs IFskina6-2011
11146	10388579	NM_016810 // Gosr1 // golgi SNAP receptor complex member 1 // 11 B5|11 // 53334 /// ENS	Gosr1	NM_016810	2.40942	2.40942	SGa62010 up vs IFskina6-2010	2.20893	2.20893	SGa6-2011 up vs IFskina6-2011
30809	10567995	NM_019738 // Nupr1 // nuclear protein 1 // 7 F4|7 // 56312 /// ENSMUST00000032961 // Nu	Nupr1	NM_019738	2.4115	2.4115	SGa62010 up vs IFskina6-2010	3.38993	3.38993	SGa6-2011 up vs IFskina6-2011
11963	10397145	NM_134188 // Acot2 // acyl-CoA thioesterase 2 // 12|12 D3 // 171210 /// ENSMUST00000021	Acot2	NM_134188	2.41814	2.41814	SGa62010 up vs IFskina6-2010	2.0614	2.0614	SGa6-2011 up vs IFskina6-2011
6998	10348451	NM_007722 // Cxcr7 // chemokine (C-X-C motif) receptor 7 // 1 D|1 55.6 cM // 12778 ///	Cxcr7	NM_007722	2.41912	2.41912	SGa62010 up vs IFskina6-2010	7.57474	7.57474	SGa6-2011 up vs IFskina6-2011
18570	10457071	NM_025797 // Cyb5 // cytochrome b-5 // 18 E4|18 55.0 cM // 109672 /// ENSMUST0000016018	Cyb5	NM_025797	2.42444	2.42444	SGa62010 up vs IFskina6-2010	4.29925	4.29925	SGa6-2011 up vs IFskina6-2011
33751	10595466	NM_028352 // Pgm3 // phosphoglucomutase 3 // 9 E3.2|9 48.0 cM // 109785 /// NM_00116374	Pgm3	NM_028352	2.43144	2.43144	SGa62010 up vs IFskina6-2010	3.6821	3.6821	SGa6-2011 up vs IFskina6-2011
30685	10566846	NM_021494 // Dennd5a // DENN/MADD domain containing 5A // 7 F1|7 // 19347 /// ENSMUST00	Dennd5a	NM_021494	2.43469	2.43469	SGa62010 up vs IFskina6-2010	2.33117	2.33117	SGa6-2011 up vs IFskina6-2011
22859	10497548	NM_173182 // Fndc3b // fibronectin type III domain containing 3B // 3 A3|3 // 72007 ///	Fndc3b	NM_173182	2.44646	2.44646	SGa62010 up vs IFskina6-2010	2.04015	2.04015	SGa6-2011 up vs IFskina6-2011
31382	10573027	NM_001081164 // Otud4 // OTU domain containing 4 // 8 C3|8 36.0 cM // 73945 /// ENSMUST	Otud4	NM_001081164	2.44828	2.44828	SGa62010 up vs IFskina6-2010	3.81096	3.81096	SGa6-2011 up vs IFskina6-2011
14207	10415678	NM_026908 // Cab39l // calcium binding protein 39-like // 14 C3-D1|14 // 69008 /// ENSM	Cab39l	NM_026908	2.46523	2.46523	SGa62010 up vs IFskina6-2010	2.78913	2.78913	SGa6-2011 up vs IFskina6-2011
25368	10520419	NM_133907 // Ube3c // ubiquitin protein ligase E3C // 5 B1|5 // 100763 /// ENSMUST00000	Ube3c	NM_133907	2.47268	2.47268	SGa62010 up vs IFskina6-2010	2.52765	2.52765	SGa6-2011 up vs IFskina6-2011				ECM/ Signal
29963	10562368	BC060233 // 4931406P16Rik // RIKEN cDNA 4931406P16 gene // 7 B1|7 // 233103 /// NM_1727	4931406P16Rik	BC060233	2.47485	2.47485	SGa62010 up vs IFskina6-2010	2.0462	2.0462	SGa6-2011 up vs IFskina6-2011
23431	10502655	NM_010516 // Cyr61 // cysteine rich protein 61 // 3 H2|3 72.9 cM // 16007 /// ENSMUST00	Cyr61	NM_010516	2.47776	2.47776	SGa62010 up vs IFskina6-2010	2.60158	2.60158	SGa6-2011 up vs IFskina6-2011
33550	10593421	NM_023483 // 1110032A03Rik // RIKEN cDNA 1110032A03 gene // 9|9 B // 68721 /// ENSMUST0	1110032A03Rik	NM_023483	2.48171	2.48171	SGa62010 up vs IFskina6-2010	2.12294	2.12294	SGa6-2011 up vs IFskina6-2011
31792	10577222	NM_025556 // 2410022L05Rik // RIKEN cDNA 2410022L05 gene // 8 A1.1|8 // 66423 /// ENSMU	2410022L05Rik	NM_025556	2.49241	2.49241	SGa62010 up vs IFskina6-2010	2.10161	2.10161	SGa6-2011 up vs IFskina6-2011
10304	10380321	NM_134012 // Mbtd1 // mbt domain containing 1 // 11 D|11 // 103537 /// BC064014 // Mbtd	Mbtd1	NM_134012	2.49851	2.49851	SGa62010 up vs IFskina6-2010	2.28307	2.28307	SGa6-2011 up vs IFskina6-2011
29768	10560618	NM_007469 // Apoc1 // apolipoprotein C-I // 7 A3|7 4.0 cM // 11812 /// NM_001110009 //	Apoc1	NM_007469	2.5007	2.5007	SGa62010 up vs IFskina6-2010	3.50556	3.50556	SGa6-2011 up vs IFskina6-2011
7219	10350758	AK080751 // A930039A15Rik // RIKEN cDNA A930039A15 gene // --- // 791276	A930039A15Rik	AK080751	2.50507	2.50507	SGa62010 up vs IFskina6-2010	2.56407	2.56407	SGa6-2011 up vs IFskina6-2011
13907	10413596	NM_001166532 // Sfmbt1 // Scm-like with four mbt domains 1 // 14 B|14 10.5 cM // 54650	Sfmbt1	NM_001166532	2.50598	2.50598	SGa62010 up vs IFskina6-2010	2.77703	2.77703	SGa6-2011 up vs IFskina6-2011
7470	10353032	BC059209 // Vcpip1 // valosin containing protein (p97)/p47 complex interacting protein	Vcpip1	BC059209	2.51684	2.51684	SGa62010 up vs IFskina6-2010	2.08791	2.08791	SGa6-2011 up vs IFskina6-2011
26972	10536635	BC151018 // A430107O13Rik // RIKEN cDNA A430107O13 gene // 6 A3.1|6 // 214642 /// NM_00	A430107O13Rik	BC151018	2.53901	2.53901	SGa62010 up vs IFskina6-2010	3.68629	3.68629	SGa6-2011 up vs IFskina6-2011
29825	10560911	NM_010261 // Rabac1 // Rab acceptor 1 (prenylated) // 7 A3|7 // 14470 /// ENSMUST000000	Rabac1	NM_010261	2.54069	2.54069	SGa62010 up vs IFskina6-2010	2.03825	2.03825	SGa6-2011 up vs IFskina6-2011
30626	10566583	AK172683 // Gm8995 // predicted gene 8995 // 7 E3|7 // 668139 /// XR_035350 // Gm8995 /	Gm8995	AK172683	2.54507	2.54507	SGa62010 up vs IFskina6-2010	2.34336	2.34336	SGa6-2011 up vs IFskina6-2011
29090	10554800	NM_028238 // Rab38 // RAB38, member of RAS oncogene family // 7 E1|7 46.0 cM // 72433 /	Rab38	NM_028238	2.55758	2.55758	SGa62010 up vs IFskina6-2010	2.11957	2.11957	SGa6-2011 up vs IFskina6-2011
24013	10507606	NM_001038998 // Ccdc23 // coiled-coil domain containing 23 // 4 D2.1|4 // 69216 /// NM_	Ccdc23	NM_001038998	2.55983	2.55983	SGa62010 up vs IFskina6-2010	2.43798	2.43798	SGa6-2011 up vs IFskina6-2011
24841	10515425	NR_028524 // Snord38a // small nucleolar RNA, C/D box 38A // 4|4 // 100217424	Snord38a	NR_028524	2.55993	2.55993	SGa62010 up vs IFskina6-2010	2.45531	2.45531	SGa6-2011 up vs IFskina6-2011
17342	10445308	NM_018887 // Cyp39a1 // cytochrome P450, family 39, subfamily a, polypeptide 1 // 17 B3	Cyp39a1	NM_018887	2.56447	2.56447	SGa62010 up vs IFskina6-2010	3.2683	3.2683	SGa6-2011 up vs IFskina6-2011				Cell Adhesion/Signal
8968	10367349	NM_001114097 // Smarcc2 // SWI/SNF related, matrix associated, actin dependent regulato	Smarcc2	NM_001114097	2.57119	2.57119	SGa62010 up vs IFskina6-2010	2.80505	2.80505	SGa6-2011 up vs IFskina6-2011
6713	10345241	NM_134448 // Dst // dystonin // 1 B|1 16.5 cM // 13518 /// NM_133833 // Dst // dystonin	Dst	NM_134448	2.57441	2.57441	SGa62010 up vs IFskina6-2010	2.06036	2.06036	SGa6-2011 up vs IFskina6-2011
18073	10452110	NM_153152 // 2410015M20Rik // RIKEN cDNA 2410015M20 gene // 17 D|17 // 224904 /// ENSMU	2410015M20Rik	NM_153152	2.5799	2.5799	SGa62010 up vs IFskina6-2010	2.29099	2.29099	SGa6-2011 up vs IFskina6-2011				Cell Junction
30397	10565193	NM_013886 // Hdgfrp3 // hepatoma-derived growth factor, related protein 3 // 7 D3|7 //	Hdgfrp3	NM_013886	2.59125	2.59125	SGa62010 up vs IFskina6-2010	2.24944	2.24944	SGa6-2011 up vs IFskina6-2011
34090	10598482	NM_011591 // Timm17b // translocase of inner mitochondrial membrane 17b // X A1.1|X 2.0	Timm17b	NM_011591	2.59995	2.59995	SGa62010 up vs IFskina6-2010	2.45996	2.45996	SGa6-2011 up vs IFskina6-2011
23071	10499394	NM_001002011 // Lmna // lamin A // 3 F1|3 42.6 cM // 16905 /// NM_001111102 // Lmna //	Lmna	NM_001002011	2.6069	2.6069	SGa62010 up vs IFskina6-2010	4.31534	4.31534	SGa6-2011 up vs IFskina6-2011
10691	10384145	NM_029938 // H2afv // H2A histone family, member V // 11 A1|11 // 77605 /// ENSMUST0000	H2afv	NM_029938	2.62506	2.62506	SGa62010 up vs IFskina6-2010	3.26884	3.26884	SGa6-2011 up vs IFskina6-2011
23362	10501922	NR_028574 // Snhg8 // small nucleolar RNA host gene 8 // 3 G3|3 // 69895 /// NR_028573	Snhg8	NR_028574	2.63862	2.63862	SGa62010 up vs IFskina6-2010	2.36405	2.36405	SGa6-2011 up vs IFskina6-2011
10840	10385511	NM_011190 // Psme2 // proteasome (prosome, macropain) 28 subunit, beta // 14 C2-D1|14 2	Psme2	NM_011190	2.64423	2.64423	SGa62010 up vs IFskina6-2010	3.31743	3.31743	SGa6-2011 up vs IFskina6-2011
18456	10455961	NM_001146275 // Iigp1 // interferon inducible GTPase 1 // 18 D3|18 // 60440 /// NM_0217	Iigp1	NM_001146275	2.65649	2.65649	SGa62010 up vs IFskina6-2010	2.22456	2.22456	SGa6-2011 up vs IFskina6-2011
13545	10410092	NM_175494 // Zfp367 // zinc finger protein 367 // 13 B3|13 // 238673 /// ENSMUST0000005	Zfp367	NM_175494	2.65866	2.65866	SGa62010 up vs IFskina6-2010	2.38826	2.38826	SGa6-2011 up vs IFskina6-2011
19702	10467826	NM_001081257 // Hpse2 // heparanase 2 // 19 C3|19 // 545291 /// ENSMUST00000099428 // H	Hpse2	NM_001081257	2.66118	2.66118	SGa62010 up vs IFskina6-2010	4.55077	4.55077	SGa6-2011 up vs IFskina6-2011
18649	10457888	NM_001004361 // 5730494M16Rik // RIKEN cDNA 5730494M16 gene // 18 A2|18 // 66648 /// NM	5730494M16Rik	NM_001004361	2.66349	2.66349	SGa62010 up vs IFskina6-2010	2.30444	2.30444	SGa6-2011 up vs IFskina6-2011
26475	10531645	NM_016690 // Hnrpdl // heterogeneous nuclear ribonucleoprotein D-like // 5 E4|5 54.0 cM	Hnrpdl	NM_016690	2.69133	2.69133	SGa62010 up vs IFskina6-2010	2.03466	2.03466	SGa6-2011 up vs IFskina6-2011
19171	10462454	NM_144873 // Uhrf2 // ubiquitin-like, containing PHD and RING finger domains 2 // 19 C1	Uhrf2	NM_144873	2.69224	2.69224	SGa62010 up vs IFskina6-2010	2.36247	2.36247	SGa6-2011 up vs IFskina6-2011				Sugar Transport
14760	10420572	NM_170591 // Nupl1 // nucleoporin like 1 // 14 D1|14 // 71844 /// NR_030458 // Mir719 /	Nupl1	NM_170591	2.70167	2.70167	SGa62010 up vs IFskina6-2010	2.19249	2.19249	SGa6-2011 up vs IFskina6-2011
8079	10358816	NM_010683 // Lamc1 // laminin, gamma 1 // 1 G3|1 81.1 cM // 226519 /// ENSMUST000000277	Lamc1	NM_010683	2.71956	2.71956	SGa62010 up vs IFskina6-2010	3.30789	3.30789	SGa6-2011 up vs IFskina6-2011
6660	10344837	NM_029525 // Prex2 // phosphatidylinositol-3,4,5-trisphosphate-dependent Rac exchange f	Prex2	NM_029525	2.74934	2.74934	SGa62010 up vs IFskina6-2010	2.17578	2.17578	SGa6-2011 up vs IFskina6-2011
8074	10358733	NM_016846 // Rgl1 // ral guanine nucleotide dissociation stimulator,-like 1 // 1|1 G2 /	Rgl1	NM_016846	2.75471	2.75471	SGa62010 up vs IFskina6-2010	2.67632	2.67632	SGa6-2011 up vs IFskina6-2011
24171	10509163	NM_008321 // Id3 // inhibitor of DNA binding 3 // 4 D3|4 66.0 cM // 15903 /// ENSMUST00	Id3	NM_008321	2.75501	2.75501	SGa62010 up vs IFskina6-2010	3.14506	3.14506	SGa6-2011 up vs IFskina6-2011
28110	10546450	NM_175314 // Adamts9 // a disintegrin-like and metallopeptidase (reprolysin type) with	Adamts9	NM_175314	2.75723	2.75723	SGa62010 up vs IFskina6-2010	2.17545	2.17545	SGa6-2011 up vs IFskina6-2011				Ubl Conj Path
9803	10375360	NM_007897 // Ebf1 // early B-cell factor 1 // 11 B1.1|11 20.0 cM // 13591 /// ENSMUST00	Ebf1	NM_007897	2.77104	2.77104	SGa62010 up vs IFskina6-2010	3.48376	3.48376	SGa6-2011 up vs IFskina6-2011
25034	10517147	NM_026144 // Dhdds // dehydrodolichyl diphosphate synthase // 4 D3|4 // 67422 /// ENSMU	Dhdds	NM_026144	2.77379	2.77379	SGa62010 up vs IFskina6-2010	2.18461	2.18461	SGa6-2011 up vs IFskina6-2011				Recpetor
13488	10409579	NM_019568 // Cxcl14 // chemokine (C-X-C motif) ligand 14 // 13 B1|13 // 57266 /// ENSMU	Cxcl14	NM_019568	2.80642	2.80642	SGa62010 up vs IFskina6-2010	3.49823	3.49823	SGa6-2011 up vs IFskina6-2011
16346	10436456	NM_011173 // Pros1 // protein S (alpha) // 16 C1.3|16 // 19128 /// ENSMUST00000023629 /	Pros1	NM_011173	2.81478	2.81478	SGa62010 up vs IFskina6-2010	3.07096	3.07096	SGa6-2011 up vs IFskina6-2011
33739	10595371	NM_026122 // Hmgn3 // high mobility group nucleosomal binding domain 3 // 9|9 E3.1 // 9	Hmgn3	NM_026122	2.81546	2.81546	SGa62010 up vs IFskina6-2010	2.57522	2.57522	SGa6-2011 up vs IFskina6-2011
27018	10537179	NM_007563 // Bpgm // 2,3-bisphosphoglycerate mutase // 6 B1|6 // 12183 /// ENSMUST00000	Bpgm	NM_007563	2.81914	2.81914	SGa62010 up vs IFskina6-2010	2.52765	2.52765	SGa6-2011 up vs IFskina6-2011				Apoptosis
21745	10487040	NM_007993 // Fbn1 // fibrillin 1 // 2 F|2 71.0 cM // 14118 /// ENSMUST00000103234 // Fb	Fbn1	NM_007993	2.85825	2.85825	SGa62010 up vs IFskina6-2010	5.77471	5.77471	SGa6-2011 up vs IFskina6-2011
22193	10491399	NM_029017 // Mrpl47 // mitochondrial ribosomal protein L47 // 3|3 B // 74600 /// BC0879	Mrpl47	NM_029017	2.85974	2.85974	SGa62010 up vs IFskina6-2010	3.23713	3.23713	SGa6-2011 up vs IFskina6-2011
25555	10522503	NM_011058 // Pdgfra // platelet derived growth factor receptor, alpha polypeptide // 5	Pdgfra	NM_011058	2.87373	2.87373	SGa62010 up vs IFskina6-2010	3.60361	3.60361	SGa6-2011 up vs IFskina6-2011				Apoptosis/Txn
21349	10483865	NM_010222 // Fkbp7 // FK506 binding protein 7 // 2 C3|2 60.5 cM // 14231 /// ENSMUST000	Fkbp7	NM_010222	2.89506	2.89506	SGa62010 up vs IFskina6-2010	5.05355	5.05355	SGa6-2011 up vs IFskina6-2011
13155	10407053	BC004049 // 2810008M24Rik // RIKEN cDNA 2810008M24 gene // 13 D2.1|13 // 75616 /// BC07	2810008M24Rik	BC004049	2.90121	2.90121	SGa62010 up vs IFskina6-2010	5.18685	5.18685	SGa6-2011 up vs IFskina6-2011				Receptor
15493	10427885	NM_001165971 // Gm5803 // predicted gene 5803 // 15 A2|15 // 545091 /// NM_010447 // Hn	Gm5803	NM_001165971	2.90884	2.90884	SGa62010 up vs IFskina6-2010	2.42298	2.42298	SGa6-2011 up vs IFskina6-2011
13742	10411974	NM_029665 // Ipo11 // importin 11 // 13 D2.1|13 // 76582 /// ENSMUST00000080856 // Ipo1	Ipo11	NM_029665	2.92369	2.92369	SGa62010 up vs IFskina6-2010	2.98918	2.98918	SGa6-2011 up vs IFskina6-2011
7971	10358339	NM_009888 // Cfh // complement component factor h // 1 F|1 74.1 cM // 12628 /// ENSMUST	Cfh	NM_009888	2.9243	2.9243	SGa62010 up vs IFskina6-2010	2.68546	2.68546	SGa6-2011 up vs IFskina6-2011
33210	10590445	NM_133741 // Snrk // SNF related kinase // 9 F4|9 // 20623 /// NM_001164572 // Snrk //	Snrk	NM_133741	2.93273	2.93273	SGa62010 up vs IFskina6-2010	2.80517	2.80517	SGa6-2011 up vs IFskina6-2011
8803	10365637	NM_025859 // Arl1 // ADP-ribosylation factor-like 1 // 10 C1|10 // 104303 /// ENSMUST00	Arl1	NM_025859	2.9394	2.9394	SGa62010 up vs IFskina6-2010	10.7474	10.7474	SGa6-2011 up vs IFskina6-2011
11636	10393844	NM_011568 // Thoc4 // THO complex 4 // 11 E2|11 // 21681 /// ENSMUST00000026125 // Thoc	Thoc4	NM_011568	2.9443	2.9443	SGa62010 up vs IFskina6-2010	2.07437	2.07437	SGa6-2011 up vs IFskina6-2011
21786	10487629	NM_130884 // Idh3b // isocitrate dehydrogenase 3 (NAD+) beta // 2|2 F3 // 170718 /// EN	Idh3b	NM_130884	2.94899	2.94899	SGa62010 up vs IFskina6-2010	2.04861	2.04861	SGa6-2011 up vs IFskina6-2011
31931	10578493	NM_126166 // Tlr3 // toll-like receptor 3 // 8|8 B2 // 142980 /// ENSMUST00000034056 //	Tlr3	NM_126166	2.94989	2.94989	SGa62010 up vs IFskina6-2010	2.108	2.108	SGa6-2011 up vs IFskina6-2011
23392	10502232	NM_007926 // Aimp1 // aminoacyl tRNA synthetase complex-interacting multifunctional pro	Aimp1	NM_007926	2.96862	2.96862	SGa62010 up vs IFskina6-2010	2.49536	2.49536	SGa6-2011 up vs IFskina6-2011
8145	10359624	NM_175686 // Prrx1 // paired related homeobox 1 // 1 H2.1|1 85.4 cM // 18933 /// NM_011	Prrx1	NM_175686	2.9845	2.9845	SGa62010 up vs IFskina6-2010	4.82624	4.82624	SGa6-2011 up vs IFskina6-2011
8341	10361381	NM_001079686 // Syne1 // synaptic nuclear envelope 1 // 10 A1|10 // 64009 /// NM_153399	Syne1	NM_001079686	2.98918	2.98918	SGa62010 up vs IFskina6-2010	2.21908	2.21908	SGa6-2011 up vs IFskina6-2011
10728	10384474	NM_025443 // Pno1 // partner of NOB1 homolog (S. cerevisiae) // 11 A2|11 // 66249 /// E	Pno1	NM_025443	2.99366	2.99366	SGa62010 up vs IFskina6-2010	2.31793	2.31793	SGa6-2011 up vs IFskina6-2011
14804	10420988	NM_009955 // Dpysl2 // dihydropyrimidinase-like 2 // 14 D1|14 28.2 cM // 12934 /// ENSM	Dpysl2	NM_009955	2.99613	2.99613	SGa62010 up vs IFskina6-2010	4.73909	4.73909	SGa6-2011 up vs IFskina6-2011				Cell Adhesion/Signal
29445	10557843	NM_139149 // Fus // fusion, derived from t(12;16) malignant liposarcoma (human) // 7 F3	Fus	NM_139149	3.00096	3.00096	SGa62010 up vs IFskina6-2010	2.55356	2.55356	SGa6-2011 up vs IFskina6-2011				Cell Adhesion/Signal
25693	10523727	NM_008861 // Pkd2 // polycystic kidney disease 2 // 5 E5|5 55.0 cM // 18764 /// ENSMUST	Pkd2	NM_008861	3.00895	3.00895	SGa62010 up vs IFskina6-2010	2.59317	2.59317	SGa6-2011 up vs IFskina6-2011				Cell Adhesion/Signal
7091	10349383	NM_028787 // Slc35f5 // solute carrier family 35, member F5 // 1 E3|1 // 74150 /// ENSM	Slc35f5	NM_028787	3.01709	3.01709	SGa62010 up vs IFskina6-2010	2.2808	2.2808	SGa6-2011 up vs IFskina6-2011				Ubl Conj Path
12058	10397975	NM_026790 // Ifi27l1 // interferon, alpha-inducible protein 27 like 1 // 12 E|12 51.0 c	Ifi27l1	NM_026790	3.02126	3.02126	SGa62010 up vs IFskina6-2010	2.08844	2.08844	SGa6-2011 up vs IFskina6-2011
11915	10396476	NM_023275 // Rhoj // ras homolog gene family, member J // 12 C3|12 // 80837 /// ENSMUST	Rhoj	NM_023275	3.03862	3.03862	SGa62010 up vs IFskina6-2010	2.10458	2.10458	SGa6-2011 up vs IFskina6-2011
26278	10529858	NM_173764 // Tapt1 // transmembrane anterior posterior transformation 1 // 5 B3|5 // 23	Tapt1	NM_173764	3.05388	3.05388	SGa62010 up vs IFskina6-2010	2.36418	2.36418	SGa6-2011 up vs IFskina6-2011
34583	10602090	NM_174875 // Atg4a // autophagy-related 4A (yeast) // X F1|X // 666468 /// ENSMUST00000	Atg4a	NM_174875	3.06969	3.06969	SGa62010 up vs IFskina6-2010	2.4683	2.4683	SGa6-2011 up vs IFskina6-2011
17022	10442219	NM_144515 // Zfp52 // zinc finger protein 52 // 17 A3.2|17 9.9 cM // 22710 /// ENSMUST0	Zfp52	NM_144515	3.09095	3.09095	SGa62010 up vs IFskina6-2010	4.86909	4.86909	SGa6-2011 up vs IFskina6-2011
7471	10353034	NR_004410 // Snord87 // small nucleolar RNA, C/D box 87 // 1|1 // 266793	Snord87	NR_004410	3.09169	3.09169	SGa62010 up vs IFskina6-2010	4.06779	4.06779	SGa6-2011 up vs IFskina6-2011
22747	10496592	NM_010260 // Gbp2 // guanylate binding protein 2 // 3 H1|3 67.4 cM // 14469 /// ENSMUST	Gbp2	NM_010260	3.11878	3.11878	SGa62010 up vs IFskina6-2010	2.76232	2.76232	SGa6-2011 up vs IFskina6-2011
27656	10542757	NM_172734 // Stk38l // serine/threonine kinase 38 like // 6 G3|6 // 232533 /// ENSMUST0	Stk38l	NM_172734	3.12838	3.12838	SGa62010 up vs IFskina6-2010	5.59338	5.59338	SGa6-2011 up vs IFskina6-2011
18862	10459866	NM_001171010 // Slc14a1 // solute carrier family 14 (urea transporter), member 1 // 18	Slc14a1	NM_001171010	3.14322	3.14322	SGa62010 up vs IFskina6-2010	2.36455	2.36455	SGa6-2011 up vs IFskina6-2011
16570	10438445	NM_183390 // Klhl6 // kelch-like 6 (Drosophila) // 16 A3|16 // 239743 /// ENSMUST000000	Klhl6	NM_183390	3.15048	3.15048	SGa62010 up vs IFskina6-2010	2.3031	2.3031	SGa6-2011 up vs IFskina6-2011
24122	10508721	NR_034050 // Snora44 // small nucleolar RNA, H/ACA box 44 // 4|4 // 100217418	Snora44	NR_034050	3.15974	3.15974	SGa62010 up vs IFskina6-2010	2.42035	2.42035	SGa6-2011 up vs IFskina6-2011
7147	10349947	NM_021355 // Fmod // fibromodulin // 1 E4|1 74.3 cM // 14264 /// ENSMUST00000048183 //	Fmod	NM_021355	3.1961	3.1961	SGa62010 up vs IFskina6-2010	2.31429	2.31429	SGa6-2011 up vs IFskina6-2011
34818	10604076	NR_002900 // Snora69 // small nucleolar RNA, H/ACA box 69 // X A3.3|X // 104369	Snora69	NR_002900	3.19837	3.19837	SGa62010 up vs IFskina6-2010	5.09233	5.09233	SGa6-2011 up vs IFskina6-2011				Sugar Transport
15031	10423548	NM_008304 // Sdc2 // syndecan 2 // 15 B3.1|15 12.4 cM // 15529 /// ENSMUST00000022871 /	Sdc2	NM_008304	3.22349	3.22349	SGa62010 up vs IFskina6-2010	3.11212	3.11212	SGa6-2011 up vs IFskina6-2011
34637	10602716	NM_018798 // Ubqln2 // ubiquilin 2 // X F3|X // 54609 /// ENSMUST00000060714 // Ubqln2	Ubqln2	NM_018798	3.22451	3.22451	SGa62010 up vs IFskina6-2010	2.01772	2.01772	SGa6-2011 up vs IFskina6-2011
19834	10469151	NM_172471 // Itih5 // inter-alpha (globulin) inhibitor H5 // 2 A1|2 // 209378 /// ENSMU	Itih5	NM_172471	3.24011	3.24011	SGa62010 up vs IFskina6-2010	2.02681	2.02681	SGa6-2011 up vs IFskina6-2011
11092	10388154	NM_026068 // Med31 // mediator of RNA polymerase II transcription, subunit 31 homolog (	Med31	NM_026068	3.25488	3.25488	SGa62010 up vs IFskina6-2010	2.69166	2.69166	SGa6-2011 up vs IFskina6-2011
13909	10413609	NM_181390 // Mustn1 // musculoskeletal, embryonic nuclear protein 1 // 14 B|14 // 66175	Mustn1	NM_181390	3.31606	3.31606	SGa62010 up vs IFskina6-2010	7.49808	7.49808	SGa6-2011 up vs IFskina6-2011
21302	10483353	NM_009135 // Scn7a // sodium channel, voltage-gated, type VII, alpha // 2 C1.3|2 45.0 c	Scn7a	NM_009135	3.33565	3.33565	SGa62010 up vs IFskina6-2010	2.8753	2.8753	SGa6-2011 up vs IFskina6-2011
27985	10545346	NM_027275 // Ptcd3 // pentatricopeptide repeat domain 3 // 6 C1|6 // 69956 /// ENSMUST0	Ptcd3	NM_027275	3.33712	3.33712	SGa62010 up vs IFskina6-2010	2.01236	2.01236	SGa6-2011 up vs IFskina6-2011
25843	10525397	NM_019824 // Arpc3 // actin related protein 2/3 complex, subunit 3 // 5 F|5 // 56378 //	Arpc3	NM_019824	3.35289	3.35289	SGa62010 up vs IFskina6-2010	2.30818	2.30818	SGa6-2011 up vs IFskina6-2011
10228	10379615	NM_183201 // Slfn5 // schlafen 5 // 11 C|11 // 327978 /// ENSMUST00000067443 // Slfn5 /	Slfn5	NM_183201	3.35647	3.35647	SGa62010 up vs IFskina6-2010	3.04824	3.04824	SGa6-2011 up vs IFskina6-2011
25279	10519527	NM_011076 // Abcb1a // ATP-binding cassette, sub-family B (MDR/TAP), member 1A // 5 A1|	Abcb1a	NM_011076	3.41442	3.41442	SGa62010 up vs IFskina6-2010	2.7032	2.7032	SGa6-2011 up vs IFskina6-2011
26280	10529875	NM_001077398 // Ldb2 // LIM domain binding 2 // 5 B3|5 // 16826 /// NM_010698 // Ldb2 /	Ldb2	NM_001077398	3.43408	3.43408	SGa62010 up vs IFskina6-2010	2.63058	2.63058	SGa6-2011 up vs IFskina6-2011
30915	10568859	NM_028177 // Ndufab1 // NADH dehydrogenase (ubiquinone) 1, alpha/beta subcomplex, 1 //	Ndufab1	NM_028177	3.45078	3.45078	SGa62010 up vs IFskina6-2010	2.82114	2.82114	SGa6-2011 up vs IFskina6-2011
23185	10500276	BC028528 // BC028528 // cDNA sequence BC028528 // 3 F2.1|3 // 229600 /// AF534879 // BC	BC028528	BC028528	3.4692	3.4692	SGa62010 up vs IFskina6-2010	2.11744	2.11744	SGa6-2011 up vs IFskina6-2011
27453	10541075	NM_001012477 // Cxcl12 // chemokine (C-X-C motif) ligand 12 // 6 F1|6 53.0 cM // 20315	Cxcl12	NM_001012477	3.49028	3.49028	SGa62010 up vs IFskina6-2010	2.54041	2.54041	SGa6-2011 up vs IFskina6-2011
17499	10446965	NM_207246 // Rasgrp3 // RAS, guanyl releasing protein 3 // 17 E2|17 // 240168 /// NM_00	Rasgrp3	NM_207246	3.49225	3.49225	SGa62010 up vs IFskina6-2010	2.59399	2.59399	SGa6-2011 up vs IFskina6-2011
17720	10448803	NM_198937 // Hn1l // hematological and neurological expressed 1-like // 17 A3.3|17 11.0	Hn1l	NM_198937	3.55704	3.55704	SGa62010 up vs IFskina6-2010	2.14606	2.14606	SGa6-2011 up vs IFskina6-2011
9373	10371230	NM_010301 // Gna11 // guanine nucleotide binding protein, alpha 11 // 10 C1|10 43.0 cM	Gna11	NM_010301	3.57068	3.57068	SGa62010 up vs IFskina6-2010	2.15349	2.15349	SGa6-2011 up vs IFskina6-2011
19635	10467003	NR_003650 // Gm5972 // protein phosphatase 1, regulatory (inhibitor) subunit 2 pseudoge	Gm5972	NR_003650	3.59198	3.59198	SGa62010 up vs IFskina6-2010	3.01037	3.01037	SGa6-2011 up vs IFskina6-2011
23346	10501762	NM_029655 // Snx7 // sorting nexin 7 // 3|3 G2 // 76561 /// NM_001190156 // Snx7 // sor	Snx7	NM_029655	3.60447	3.60447	SGa62010 up vs IFskina6-2010	2.10626	2.10626	SGa6-2011 up vs IFskina6-2011
27497	10541496	NM_015776 // Mfap5 // microfibrillar associated protein 5 // 6 F1|6 // 50530 /// ENSMUS	Mfap5	NM_015776	3.60862	3.60862	SGa62010 up vs IFskina6-2010	18.6435	18.6435	SGa6-2011 up vs IFskina6-2011
31025	10569890	NM_181732 // Aida // axin interactor, dorsalization associated // 1|1 // 108909 /// ENS	Aida	NM_181732	3.62808	3.62808	SGa62010 up vs IFskina6-2010	2.31517	2.31517	SGa6-2011 up vs IFskina6-2011				ECM/Signal
9896	10376060	NM_008390 // Irf1 // interferon regulatory factor 1 // 11 B1.3|11 29.0 cM // 16362 ///	Irf1	NM_008390	3.6416	3.6416	SGa62010 up vs IFskina6-2010	2.73481	2.73481	SGa6-2011 up vs IFskina6-2011
18669	10458046	NM_053078 // D0H4S114 // DNA segment, human D4S114 // 18 B1|18 // 27528 /// NM_00110998	D0H4S114	NM_053078	3.67191	3.67191	SGa62010 up vs IFskina6-2010	2.33868	2.33868	SGa6-2011 up vs IFskina6-2011
11134	10388430	NM_011340 // Serpinf1 // serine (or cysteine) peptidase inhibitor, clade F, member 1 //	Serpinf1	NM_011340	3.68152	3.68152	SGa62010 up vs IFskina6-2010	9.98902	9.98902	SGa6-2011 up vs IFskina6-2011
26504	10531980	NM_172777 // Gbp9 // guanylate-binding protein 9 // 5 E5|5 // 236573 /// DQ985742 // Gb	Gbp9	NM_172777	3.69527	3.69527	SGa62010 up vs IFskina6-2010	4.82371	4.82371	SGa6-2011 up vs IFskina6-2011				Keratinization
18693	10458303	NM_001033141 // Ecscr // endothelial cell-specific chemotaxis regulator // 18 B2|18 //	Ecscr	NM_001033141	3.70927	3.70927	SGa62010 up vs IFskina6-2010	2.3196	2.3196	SGa6-2011 up vs IFskina6-2011				Receptor
7377	10352119	NM_024282 // Pppde1 // PPPDE peptidase domain containing 1 // 1|1 H3 // 78825 /// ENSMU	Pppde1	NM_024282	3.71125	3.71125	SGa62010 up vs IFskina6-2010	2.0347	2.0347	SGa6-2011 up vs IFskina6-2011
27403	10540493	NM_138677 // Edem1 // ER degradation enhancer, mannosidase alpha-like 1 // 6 E2|6 // 19	Edem1	NM_138677	3.71734	3.71734	SGa62010 up vs IFskina6-2010	2.79206	2.79206	SGa6-2011 up vs IFskina6-2011
23905	10506488	NM_080555 // Ppap2b // phosphatidic acid phosphatase type 2B // 4 C6|4 52.7 cM // 67916	Ppap2b	NM_080555	3.73132	3.73132	SGa62010 up vs IFskina6-2010	5.60841	5.60841	SGa6-2011 up vs IFskina6-2011
24452	10511952	NM_015824 // Orc3 // origin recognition complex, subunit 3 // 4|4 A3 // 50793 /// NM_00	Orc3	NM_015824	3.7526	3.7526	SGa62010 up vs IFskina6-2010	2.24729	2.24729	SGa6-2011 up vs IFskina6-2011
7707	10355403	NM_010233 // Fn1 // fibronectin 1 // 1 C1-C5|1 36.1 cM // 14268 /// ENSMUST00000055226	Fn1	NM_010233	3.75276	3.75276	SGa62010 up vs IFskina6-2010	8.03141	8.03141	SGa6-2011 up vs IFskina6-2011
29464	10558150	NM_019564 // Htra1 // HtrA serine peptidase 1 // 7 F3|7 // 56213 /// ENSMUST00000006367	Htra1	NM_019564	3.75365	3.75365	SGa62010 up vs IFskina6-2010	3.39475	3.39475	SGa6-2011 up vs IFskina6-2011				Ubl Conj Path
11464	10391762	NM_001159382 // Gjc1 // gap junction protein, gamma 1 // 11 E1|11 // 14615 /// NM_00812	Gjc1	NM_001159382	3.77706	3.77706	SGa62010 up vs IFskina6-2010	2.51336	2.51336	SGa6-2011 up vs IFskina6-2011
22545	10494445	NM_001163170 // Lix1l // Lix1-like // 3 F2.1|3 // 280411 /// ENSMUST00000062058 // Lix1	Lix1l	NM_001163170	3.78072	3.78072	SGa62010 up vs IFskina6-2010	2.56461	2.56461	SGa6-2011 up vs IFskina6-2011
17738	10449051	NM_019719 // Stub1 // STIP1 homology and U-Box containing protein 1 // 17 B1|17 11.6 cM	Stub1	NM_019719	3.78158	3.78158	SGa62010 up vs IFskina6-2010	2.05614	2.05614	SGa6-2011 up vs IFskina6-2011
8141	10359571	NM_010231 // Fmo1 // flavin containing monooxygenase 1 // 1 H1|1 92.6 cM // 14261 /// E	Fmo1	NM_010231	3.78211	3.78211	SGa62010 up vs IFskina6-2010	2.32567	2.32567	SGa6-2011 up vs IFskina6-2011
8832	10365983	NM_008524 // Lum // lumican // 10 C3|10 61.0 cM // 17022 /// ENSMUST00000038160 // Lum	Lum	NM_008524	3.80069	3.80069	SGa62010 up vs IFskina6-2010	8.23182	8.23182	SGa6-2011 up vs IFskina6-2011
23329	10501586	NM_007901 // S1pr1 // sphingosine-1-phosphate receptor 1 // 3 G1|3 // 13609 /// ENSMUST	S1pr1	NM_007901	3.83662	3.83662	SGa62010 up vs IFskina6-2010	2.64721	2.64721	SGa6-2011 up vs IFskina6-2011
12905	10405033	NM_001012324 // Ecm2 // extracellular matrix protein 2, female organ and adipocyte spec	Ecm2	NM_001012324	3.89271	3.89271	SGa62010 up vs IFskina6-2010	2.50191	2.50191	SGa6-2011 up vs IFskina6-2011				Microtubule
9099	10368317	NM_134005 // Enpp3 // ectonucleotide pyrophosphatase/phosphodiesterase 3 // 10 A4|10 //	Enpp3	NM_134005	3.89598	3.89598	SGa62010 up vs IFskina6-2010	2.64732	2.64732	SGa6-2011 up vs IFskina6-2011
11828	10395672	NM_021710 // Ap4s1 // adaptor-related protein complex AP-4, sigma 1 // 12 C1|12 // 1178	Ap4s1	NM_021710	3.94742	3.94742	SGa62010 up vs IFskina6-2010	2.54025	2.54025	SGa6-2011 up vs IFskina6-2011
13505	10409737	NM_023328 // Agtpbp1 // ATP/GTP binding protein 1 // 13 B2|13 37.0 cM // 67269 /// NM_0	Agtpbp1	NM_023328	3.96227	3.96227	SGa62010 up vs IFskina6-2010	3.53355	3.53355	SGa6-2011 up vs IFskina6-2011
11607	10393559	NM_011594 // Timp2 // tissue inhibitor of metalloproteinase 2 // 11 E2|11 72.0 cM // 21	Timp2	NM_011594	4.08332	4.08332	SGa62010 up vs IFskina6-2010	4.4375	4.4375	SGa6-2011 up vs IFskina6-2011
32993	10587880	NM_029620 // Pcolce2 // procollagen C-endopeptidase enhancer 2 // 9 E3.3|9 // 76477 ///	Pcolce2	NM_029620	4.1284	4.1284	SGa62010 up vs IFskina6-2010	13.0331	13.0331	SGa6-2011 up vs IFskina6-2011				ECM/Signal
21381	10484463	NM_009776 // Serping1 // serine (or cysteine) peptidase inhibitor, clade G, member 1 //	Serping1	NM_009776	4.15167	4.15167	SGa62010 up vs IFskina6-2010	11.3767	11.3767	SGa6-2011 up vs IFskina6-2011
7724	10355567	NM_027154 // Tmbim1 // transmembrane BAX inhibitor motif containing 1 // 1 C3|1 // 6966	Tmbim1	NM_027154	4.16186	4.16186	SGa62010 up vs IFskina6-2010	3.43189	3.43189	SGa6-2011 up vs IFskina6-2011
13167	10407173	NM_010560 // Il6st // interleukin 6 signal transducer // 13 D2.2|13 67.0 cM // 16195 //	Il6st	NM_010560	4.20515	4.20515	SGa62010 up vs IFskina6-2010	3.75176	3.75176	SGa6-2011 up vs IFskina6-2011
32611	10584405	NM_146869 // Olfr147 // olfactory receptor 147 // 9 A5.1|9 // 258869 /// ENSMUST0000005	Olfr147	NM_146869	4.20969	4.20969	SGa62010 up vs IFskina6-2010	2.44428	2.44428	SGa6-2011 up vs IFskina6-2011
22740	10496494	NM_019571 // Tspan5 // tetraspanin 5 // 3 H1|3 // 56224 /// ENSMUST00000029800 // Tspan	Tspan5	NM_019571	4.25366	4.25366	SGa62010 up vs IFskina6-2010	4.23353	4.23353	SGa6-2011 up vs IFskina6-2011
23890	10506301	NM_001122899 // Lepr // leptin receptor // 4 C6|4 46.7 cM // 16847 /// NM_146146 // Lep	Lepr	NM_001122899	4.28814	4.28814	SGa62010 up vs IFskina6-2010	3.04295	3.04295	SGa6-2011 up vs IFskina6-2011
18510	10456522	NM_013685 // Tcf4 // transcription factor 4 // 18 E2|18 // 21413 /// NM_001083967 // Tc	Tcf4	NM_013685	4.32214	4.32214	SGa62010 up vs IFskina6-2010	2.17219	2.17219	SGa6-2011 up vs IFskina6-2011				Cell Junction
16291	10435948	NM_026439 // Ccdc80 // coiled-coil domain containing 80 // 16|16 B5 // 67896 /// ENSMUS	Ccdc80	NM_026439	4.34912	4.34912	SGa62010 up vs IFskina6-2010	11.7958	11.7958	SGa6-2011 up vs IFskina6-2011
18330	10454828	AY223547 // Pnet-ps // prenatal ethanol induced mRNA, pseudogene // 18 B2|18 // 448986	Pnet-ps	AY223547	4.43046	4.43046	SGa62010 up vs IFskina6-2010	2.85783	2.85783	SGa6-2011 up vs IFskina6-2011
32873	10586477	NM_011149 // Ppib // peptidylprolyl isomerase B // 9 C|9 // 19035 /// NM_001025612 // S	Ppib	NM_011149	4.44768	4.44768	SGa62010 up vs IFskina6-2010	2.27029	2.27029	SGa6-2011 up vs IFskina6-2011
27124	10538126	NM_174990 // Gimap4 // GTPase, IMAP family member 4 // 6 B2.3|6 // 107526 /// NM_175048	Gimap4	NM_174990	4.5072	4.5072	SGa62010 up vs IFskina6-2010	2.02869	2.02869	SGa6-2011 up vs IFskina6-2011
22175	10491191	NM_026517 // Rpl22l1 // ribosomal protein L22 like 1 // 3 A3|3 // 68028 /// ENSMUST0000	Rpl22l1	NM_026517	4.5663	4.5663	SGa62010 up vs IFskina6-2010	21.2356	21.2356	SGa6-2011 up vs IFskina6-2011
8247	10360506	NM_011785 // Akt3 // thymoma viral proto-oncogene 3 // 1|1 H4-H6 // 23797 /// ENSMUST00	Akt3	NM_011785	4.71041	4.71041	SGa62010 up vs IFskina6-2010	4.00548	4.00548	SGa6-2011 up vs IFskina6-2011
31623	10575616	ENSMUST00000034428 // Gabarapl2 // gamma-aminobutyric acid (GABA) A receptor-associated	Gabarapl2	ENSMUST00000034428	4.73423	4.73423	SGa62010 up vs IFskina6-2010	2.13498	2.13498	SGa6-2011 up vs IFskina6-2011
17339	10445268	NM_001081178 // Gpr116 // G protein-coupled receptor 116 // 17 B3|17 // 224792 /// ENSM	Gpr116	NM_001081178	4.73697	4.73697	SGa62010 up vs IFskina6-2010	2.1375	2.1375	SGa6-2011 up vs IFskina6-2011
9256	10369842	ENSMUST00000143791 // Bicc1 // bicaudal C homolog 1 (Drosophila) // 10 B5.3|10 38.6 cM	Bicc1	ENSMUST00000143791	4.77949	4.77949	SGa62010 up vs IFskina6-2010	6.86796	6.86796	SGa6-2011 up vs IFskina6-2011
16228	10435271	NM_175256 // Heg1 // HEG homolog 1 (zebrafish) // 16 B3|16 // 77446 /// ENSMUST00000038	Heg1	NM_175256	4.7937	4.7937	SGa62010 up vs IFskina6-2010	2.32612	2.32612	SGa6-2011 up vs IFskina6-2011
22818	10497265	NM_024406 // Fabp4 // fatty acid binding protein 4, adipocyte // 3 A1|3 13.9 cM // 1177	Fabp4	NM_024406	4.8612	4.8612	SGa62010 up vs IFskina6-2010	4.8283	4.8283	SGa6-2011 up vs IFskina6-2011
6760	10345762	NM_008362 // Il1r1 // interleukin 1 receptor, type I // 1 B|1 19.5 cM // 16177 /// NM_0	Il1r1	NM_008362	4.99055	4.99055	SGa62010 up vs IFskina6-2010	2.90169	2.90169	SGa6-2011 up vs IFskina6-2011				Ubl Conj Path
15330	10426479	NM_175344 // Ano6 // anoctamin 6 // 15 F1|15 // 105722 /// ENSMUST00000071874 // Ano6 /	Ano6	NM_175344	5.02106	5.02106	SGa62010 up vs IFskina6-2010	2.40162	2.40162	SGa6-2011 up vs IFskina6-2011				Ubl Conj Path
26934	10536216	NM_025331 // Gng11 // guanine nucleotide binding protein (G protein), gamma 11 // 6 A1|	Gng11	NM_025331	5.02931	5.02931	SGa62010 up vs IFskina6-2010	2.95658	2.95658	SGa6-2011 up vs IFskina6-2011
6748	10345608	NM_026123 // Unc50 // unc-50 homolog (C. elegans) // 1 B|1 // 67387 /// ENSMUST00000027	Unc50	NM_026123	5.17996	5.17996	SGa62010 up vs IFskina6-2010	2.04831	2.04831	SGa6-2011 up vs IFskina6-2011				Ubl Conj Path
28379	10548879	NM_008597 // Mgp // matrix Gla protein // 6 G1|6 // 17313 /// ENSMUST00000032342 // Mgp	Mgp	NM_008597	5.45137	5.45137	SGa62010 up vs IFskina6-2010	3.88331	3.88331	SGa6-2011 up vs IFskina6-2011
31727	10576639	NM_008737 // Nrp1 // neuropilin 1 // 8 E|8 73.0 cM // 18186 /// ENSMUST00000026917 // N	Nrp1	NM_008737	5.56724	5.56724	SGa62010 up vs IFskina6-2010	2.33572	2.33572	SGa6-2011 up vs IFskina6-2011
7449	10352905	NM_001111059 // Cd34 // CD34 antigen // 1 H6|1 106.6 cM // 12490 /// NM_133654 // Cd34	Cd34	NM_001111059	5.67326	5.67326	SGa62010 up vs IFskina6-2010	15.181	15.181	SGa6-2011 up vs IFskina6-2011
16817	10440513	NM_144853 // Cyyr1 // cysteine and tyrosine-rich protein 1 // 16 C3.3|16 56.2 cM // 224	Cyyr1	NM_144853	5.86239	5.86239	SGa62010 up vs IFskina6-2010	2.28907	2.28907	SGa6-2011 up vs IFskina6-2011
12906	10405047	NM_025711 // Aspn // asporin // 13|13 B1 // 66695 /// NM_001172481 // Aspn // asporin /	Aspn	NM_025711	6.05728	6.05728	SGa62010 up vs IFskina6-2010	23.0831	23.0831	SGa6-2011 up vs IFskina6-2011
13170	10407211	NM_008247 // Ppap2a // phosphatidic acid phosphatase type 2A // 13 D2.2|13 // 19012 ///	Ppap2a	NM_008247	6.17846	6.17846	SGa62010 up vs IFskina6-2010	2.105	2.105	SGa6-2011 up vs IFskina6-2011
35131	10606369	NM_008409 // Itm2a // integral membrane protein 2A // X|X A2-A3 // 16431 /// ENSMUST000	Itm2a	NM_008409	6.2412	6.2412	SGa62010 up vs IFskina6-2010	3.09347	3.09347	SGa6-2011 up vs IFskina6-2011
13371	10408600	NM_001164117 // Serpinb6a // serine (or cysteine) peptidase inhibitor, clade B, member	Serpinb6a	NM_001164117	6.34917	6.34917	SGa62010 up vs IFskina6-2010	4.97947	4.97947	SGa6-2011 up vs IFskina6-2011
22772	10496872	NM_133222 // Eltd1 // EGF, latrophilin seven transmembrane domain containing 1 // 3|3 H	Eltd1	NM_133222	6.79381	6.79381	SGa62010 up vs IFskina6-2010	4.6453	4.6453	SGa6-2011 up vs IFskina6-2011
29712	10560174	NM_009156 // Sepw1 // selenoprotein W, muscle 1 // 7|7 A2 // 20364 /// ENSMUST000000443	Sepw1	NM_009156	6.93658	6.93658	SGa62010 up vs IFskina6-2010	2.04476	2.04476	SGa6-2011 up vs IFskina6-2011
26505	10531987	NM_008620 // Gbp4 // guanylate binding protein 4 // 5 E5|5 60.0 cM // 17472 /// EF49442	Gbp4	NM_008620	7.11543	7.11543	SGa62010 up vs IFskina6-2010	2.3838	2.3838	SGa6-2011 up vs IFskina6-2011
16695	10439651	NM_010818 // Cd200 // CD200 antigen // 16 A1|16 29.0 cM // 17470 /// ENSMUST00000023341	Cd200	NM_010818	7.34606	7.34606	SGa62010 up vs IFskina6-2010	2.21674	2.21674	SGa6-2011 up vs IFskina6-2011
22722	10496359	NM_001163522 // Emcn // endomucin // 3 G3|3 // 59308 /// NM_016885 // Emcn // endomucin	Emcn	NM_001163522	7.34783	7.34783	SGa62010 up vs IFskina6-2010	3.75222	3.75222	SGa6-2011 up vs IFskina6-2011
27192	10538640	NM_011920 // Abcg2 // ATP-binding cassette, sub-family G (WHITE), member 2 // 6 B3|6 28	Abcg2	NM_011920	7.61022	7.61022	SGa62010 up vs IFskina6-2010	2.62726	2.62726	SGa6-2011 up vs IFskina6-2011
9012	10367591	NM_026793 // Myct1 // myc target 1 // 10 A1|10 // 68632 /// ENSMUST00000051809 // Myct1	Myct1	NM_026793	7.93105	7.93105	SGa62010 up vs IFskina6-2010	3.22462	3.22462	SGa6-2011 up vs IFskina6-2011
32977	10587746	NM_153525 // Tmem41b // transmembrane protein 41B // 7 F1|7 50.5 cM // 233724 /// ENSMU	Tmem41b	NM_153525	7.99843	7.99843	SGa62010 up vs IFskina6-2010	2.25234	2.25234	SGa6-2011 up vs IFskina6-2011
25052	10517336	NM_013885 // Clic4 // chloride intracellular channel 4 (mitochondrial) // 4 D3|4 // 298	Clic4	NM_013885	8.17506	8.17506	SGa62010 up vs IFskina6-2010	2.47525	2.47525	SGa6-2011 up vs IFskina6-2011
31531	10574438	NM_009868 // Cdh5 // cadherin 5 // 8 D3|8 51.0 cM // 12562 /// ENSMUST00000034339 // Cd	Cdh5	NM_009868	8.30355	8.30355	SGa62010 up vs IFskina6-2010	2.21433	2.21433	SGa6-2011 up vs IFskina6-2011
26375	10530841	NM_001159518 // Igfbp7 // insulin-like growth factor binding protein 7 // 5 C3.3|5 // 2	Igfbp7	NM_001159518	8.45985	8.45985	SGa62010 up vs IFskina6-2010	3.89643	3.89643	SGa6-2011 up vs IFskina6-2011
19231	10463070	NM_009848 // Entpd1 // ectonucleoside triphosphate diphosphohydrolase 1 // 19 C3|19 35.	Entpd1	NM_009848	8.6004	8.6004	SGa62010 up vs IFskina6-2010	4.52978	4.52978	SGa6-2011 up vs IFskina6-2011
35284	10607467	NM_009121 // Sat1 // spermidine/spermine N1-acetyl transferase 1 // X F3-F4|X 65.2 cM /	Sat1	NM_009121	8.67392	8.67392	SGa62010 up vs IFskina6-2010	2.31542	2.31542	SGa6-2011 up vs IFskina6-2011
22941	10498273	NM_008536 // Tm4sf1 // transmembrane 4 superfamily member 1 // 3 D|3 // 17112 /// ENSMU	Tm4sf1	NM_008536	9.6671	9.6671	SGa62010 up vs IFskina6-2010	5.92116	5.92116	SGa6-2011 up vs IFskina6-2011
32759	10585438	NM_013496 // Crabp1 // cellular retinoic acid binding protein I // 9 A5.3|9 31.0 cM //	Crabp1	NM_013496	10.1971	10.1971	SGa62010 up vs IFskina6-2010	6.40946	6.40946	SGa6-2011 up vs IFskina6-2011
21852	10488382	NM_010740 // Cd93 // CD93 antigen // 2 G3|2 84.0 cM // 17064 /// ENSMUST00000099269 //	Cd93	NM_010740	10.4184	10.4184	SGa62010 up vs IFskina6-2010	5.6473	5.6473	SGa6-2011 up vs IFskina6-2011
11504	10392221	NM_008816 // Pecam1 // platelet/endothelial cell adhesion molecule 1 // 11 E1|11 // 186	Pecam1	NM_008816	10.6066	10.6066	SGa62010 up vs IFskina6-2010	4.08863	4.08863	SGa6-2011 up vs IFskina6-2011
7272	10351182	NM_011345 // Sele // selectin, endothelial cell // 1 H2.2|1 86.6 cM // 20339 /// ENSMUS	Sele	NM_011345	10.8905	10.8905	SGa62010 up vs IFskina6-2010	13.8852	13.8852	SGa6-2011 up vs IFskina6-2011
13519	10409876	NM_007796 // Ctla2a // cytotoxic T lymphocyte-associated protein 2 alpha // 13 B2|13 36	Ctla2a	NM_007796	12.8419	12.8419	SGa62010 up vs IFskina6-2010	11.2775	11.2775	SGa6-2011 up vs IFskina6-2011
32815	10585982	NM_173018 // Myo9a // myosin IXa // 9 B|9 33.0 cM // 270163 /// ENSMUST00000136740 // M	Myo9a	NM_173018	14.7466	14.7466	SGa62010 up vs IFskina6-2010	3.2405	3.2405	SGa6-2011 up vs IFskina6-2011
7274	10351206	NM_011347 // Selp // selectin, platelet // 1 H2.2|1 86.6 cM // 20344 /// ENSMUST0000016	Selp	NM_011347	15.1575	15.1575	SGa62010 up vs IFskina6-2010	5.49464	5.49464	SGa6-2011 up vs IFskina6-2011
10138	10378568	NR_029739 // Mir22 // microRNA 22 // 11|11 // 387141 /// NR_030711 // 2210403K04Rik //	Mir22	NR_029739	16.8249	16.8249	SGa62010 up vs IFskina6-2010	5.476	5.476	SGa6-2011 up vs IFskina6-2011
24378	10511363	NM_001002927 // Penk // preproenkephalin // 4 A1|4 0.8 cM // 18619 /// ENSMUST000000703	Penk	NM_001002927	18.2612	18.2612	SGa62010 up vs IFskina6-2010	7.06144	7.06144	SGa6-2011 up vs IFskina6-2011
26497	10531931	NM_010097 // Sparcl1 // SPARC-like 1 // 5 E4|5 55.0 cM // 13602 /// ENSMUST00000031249	Sparcl1	NM_010097	21.2833	21.2833	SGa62010 up vs IFskina6-2010	6.8482	6.8482	SGa6-2011 up vs IFskina6-2011
25371	10520452	NM_031168 // Il6 // interleukin 6 // 5 B1|5 17.0 cM // 16193 /// ENSMUST00000026845 //	Il6	NM_031168	24.4331	24.4331	SGa62010 up vs IFskina6-2010	5.15805	5.15805	SGa6-2011 up vs IFskina6-2011
10497	10382104	NR_030703 // Snord104 // small nucleolar RNA, C/D box 104 // 11|11 // 100216537	Snord104	NR_030703	43.2852	43.2852	SGa62010 up vs IFskina6-2010	2.61146	2.61146	SGa6-2011 up vs IFskina6-2011
